# Supplementary material
Source: publisher figshare collection journal article supplement (https://acs.figshare.com/ndownloader/files/5843304)
Supplement: Supplementary file 1 [file 5843304]

data_p1
_audit_creation_date              2016-07-14
_audit_creation_method
;
Olex2 1.2
(compiled 2016.02.19 svn.r3266 for OlexSys, GUI svn.r5155)
;
_publ_contact_author_address      ?
_publ_contact_author_email        ?
_publ_contact_author_name         ''
_publ_contact_author_phone        ?
_publ_section_references
;
Dolomanov, O.V., Bourhis, L.J., Gildea, R.J, Howard, J.A.K. & Puschmann, H.
 (2009), J. Appl. Cryst. 42, 339-341.

Sheldrick, G.M. (2008). Acta Cryst. A64, 112-122.
;
_chemical_name_common             ?
_chemical_name_systematic
;
 ? 
;
_chemical_formula_moiety
'C16 H16 Co6 N8 O80 P2 W20, C16 H16 Co3 N8 O8, Na O6, 15(O2)'
_chemical_formula_sum             'C32 H32 Co9 N16 Na O124 P2 W20'
_chemical_formula_weight          6917.04
_chemical_absolute_configuration  ad
_chemical_melting_point           ?
loop_
  _atom_type_symbol
  _atom_type_description
  _atom_type_scat_dispersion_real
  _atom_type_scat_dispersion_imag
  _atom_type_scat_source
 'C' 'C' 0.0033 0.0016 'International Tables Vol C Tables 4.2.6.8 and 6.1.1.4'
 'H' 'H' 0.0000 0.0000 'International Tables Vol C Tables 4.2.6.8 and 6.1.1.4'
 'Co' 'Co' 0.3494 0.9721 'International Tables Vol C Tables 4.2.6.8 and 6.1.1.4'
 'N' 'N' 0.0061 0.0033 'International Tables Vol C Tables 4.2.6.8 and 6.1.1.4'
 'Na' 'Na' 0.0362 0.0249 'International Tables Vol C Tables 4.2.6.8 and 6.1.1.4'
 'O' 'O' 0.0106 0.0060 'International Tables Vol C Tables 4.2.6.8 and 6.1.1.4'
 'P' 'P' 0.1023 0.0942 'International Tables Vol C Tables 4.2.6.8 and 6.1.1.4'
 'W' 'W' -0.8490 6.8722 'International Tables Vol C Tables 4.2.6.8 and 6.1.1.4'

_space_group_crystal_system       'monoclinic'
_space_group_IT_number            4
_space_group_name_H-M_alt         'P 1 21 1'
_space_group_name_Hall            'P 2yb'
loop_
  _space_group_symop_id
  _space_group_symop_operation_xyz
 1 'x, y, z'
 2 '-x, y+1/2, -z'

_cell_length_a                    12.1218(5)
_cell_length_b                    44.069(2)
_cell_length_c                    13.7866(7)
_cell_angle_alpha                 90.00
_cell_angle_beta                  92.743(3)
_cell_angle_gamma                 90.00
_cell_volume                      7356.3(6)
_cell_formula_units_Z             2
_cell_measurement_reflns_used     9946
_cell_measurement_temperature     173(2)
_cell_measurement_theta_max       27.417
_cell_measurement_theta_min       2.679
_exptl_absorpt_coefficient_mu     16.687
_exptl_absorpt_correction_T_max   0.3487
_exptl_absorpt_correction_T_min   0.2862
_exptl_absorpt_correction_type    ?
_exptl_absorpt_process_details    ?
_exptl_crystal_colour             ?
_exptl_crystal_density_diffrn     3.123
_exptl_crystal_density_meas       ?
_exptl_crystal_density_method     'not measured'
_exptl_crystal_description        rod
_exptl_crystal_F_000              6184
_exptl_crystal_size_max           0.1
_exptl_crystal_size_mid           0.1
_exptl_crystal_size_min           0.08
_exptl_special_details
;
 ? 
;
_diffrn_reflns_av_R_equivalents   0.0309
_diffrn_reflns_av_unetI/netI      0.0602
_diffrn_reflns_limit_h_max        13
_diffrn_reflns_limit_h_min        -14
_diffrn_reflns_limit_k_max        54
_diffrn_reflns_limit_k_min        -53
_diffrn_reflns_limit_l_max        16
_diffrn_reflns_limit_l_min        -16
_diffrn_reflns_number             46400
_diffrn_reflns_theta_full         26.00
_diffrn_reflns_theta_max          26.00
_diffrn_reflns_theta_min          2.68
_diffrn_ambient_temperature       173.15
_diffrn_detector_area_resol_mean  ?
_diffrn_measured_fraction_theta_full 0.991
_diffrn_measured_fraction_theta_max 0.991
_diffrn_measurement_device_type   'CCD area detector'
_diffrn_measurement_method        ?
_diffrn_radiation_monochromator   graphite
_diffrn_radiation_type            MoK\a
_diffrn_radiation_wavelength      0.71073
_diffrn_source                    'fine-focus sealed tube'
_diffrn_standards_decay_%         ?
_diffrn_standards_interval_count  ?
_diffrn_standards_interval_time   ?
_diffrn_standards_number          ?
_reflns_number_gt                 23108
_reflns_number_total              26848
_reflns_threshold_expression      >2sigma(I)
_computing_cell_refinement        ?
_computing_data_collection        ?
_computing_data_reduction         ?
_computing_molecular_graphics     'Olex2 (Dolomanov et al., 2009)'
_computing_publication_material   'Olex2 (Dolomanov et al., 2009)'
_computing_structure_refinement   'XH (Sheldrick, 2008)'
_computing_structure_solution     'SHELXS-97 (Sheldrick, 1990)'
_refine_diff_density_max          1.797
_refine_diff_density_min          -1.333
_refine_diff_density_rms          0.249
_refine_ls_abs_structure_details  'Flack H D (1983), Acta Cryst. A39, 876-881'
_refine_ls_abs_structure_Flack    0.044(8)
_refine_ls_extinction_coef        ?
_refine_ls_extinction_method      none
_refine_ls_goodness_of_fit_ref    0.996
_refine_ls_hydrogen_treatment     constr
_refine_ls_matrix_type            full
_refine_ls_number_parameters      1781
_refine_ls_number_reflns          26848
_refine_ls_number_restraints      33
_refine_ls_R_factor_all           0.0508
_refine_ls_R_factor_gt            0.0419
_refine_ls_restrained_S_all       0.996
_refine_ls_shift/su_max           0.003
_refine_ls_shift/su_mean          0.000
_refine_ls_structure_factor_coef  Fsqd
_refine_ls_weighting_details
'calc w=1/[\s^2^(Fo^2^)+(0.0507P)^2^+0.0000P] where P=(Fo^2^+2Fc^2^)/3'
_refine_ls_weighting_scheme       calc
_refine_ls_wR_factor_gt           0.0958
_refine_ls_wR_factor_ref          0.0993
_refine_special_details
;
 Refinement of F^2^ against ALL reflections.  The weighted R-factor wR and 
 goodness of fit S are based on F^2^, conventional R-factors R are based 
 on F, with F set to zero for negative F^2^. The threshold expression of 
 F^2^ > 2sigma(F^2^) is used only for calculating R-factors(gt) etc. and is 
 not relevant to the choice of reflections for refinement.  R-factors based 
 on F^2^ are statistically about twice as large as those based on F, and R- 
 factors based on ALL data will be even larger. 
;
_olex2_refinement_description
;
1. Fixed Uiso
 At 1.2 times of:
  All C(H) groups
2. Restrained distances
 O45W-O44W
 2.75 with sigma of 0.01
 O49W-O44W
 2.75 with sigma of 0.01
 O42W-O49W
 2.75 with sigma of 0.01
 O43W-O49W
 2.75 with sigma of 0.01
 O49W-O45W
 2.75 with sigma of 0.01
3. Uiso/Uaniso restraints and constraints
Na1 \\sim O42W \\sim O45W \\sim O46W: within 1.7A with sigma of 0.004 and sigma
for terminal atoms of 0.08
O1W \\sim O1WA: within 1.7A with sigma of 0.004 and sigma for terminal atoms of
0.08
O2W \\sim O2WA: within 1.7A with sigma of 0.004 and sigma for terminal atoms of
0.08
O3W \\sim O3WA: within 1.7A with sigma of 0.004 and sigma for terminal atoms of
0.08
Uanis(O19) \\sim Ueq, Uanis(O18) \\sim Ueq, Uanis(C12) \\sim Ueq, Uanis(C14)
\\sim Ueq: with sigma of 0.006 and sigma for terminal atoms of 0.2
4. Others
 Fixed Sof: O4W(0.5) O4WA(0.5) O3W(0.3) O3WA(0.7) O2W(0.5) O2WA(0.5) O5W(0.5)
 O5WA(0.5) O1W(0.5) O1WA(0.5) O6W(0.5) O6WA(0.5)
5.a Aromatic/amide H refined with riding coordinates:
 C1(H1), C2(H2), C3(H3), C4(H4), C5(H5), C6(H6), C7(H7), C8(H8), C9(H9),
 C10(H10), C11(H11), C12(H12), C13(H13), C14(H14), C15(H15), C16(H16), C17(H17),
  C18(H18), C19(H19), C20(H20), C21(H21), C22(H22), C23(H23), C24(H24),
 C25(H25), C26(H26), C27(H27), C28(H28), C29(H29), C30(H30), C31(H31), C32(H32)
;
_atom_sites_solution_hydrogens    geom
_atom_sites_solution_primary      direct
_atom_sites_solution_secondary    difmap
loop_
  _atom_site_label
  _atom_site_type_symbol
  _atom_site_fract_x
  _atom_site_fract_y
  _atom_site_fract_z
  _atom_site_U_iso_or_equiv
  _atom_site_adp_type
  _atom_site_occupancy
  _atom_site_calc_flag
  _atom_site_disorder_assembly
  _atom_site_disorder_group
  _atom_site_refinement_flags_posn
  _atom_site_refinement_flags_adp
 W1 W 0.20632(6) 0.817299(16) -0.06326(5) 0.02719(16) Uani 1 d . . . .
 W2 W 0.29989(6) 0.842169(16) 0.18627(5) 0.02715(16) Uani 1 d . . . .
 W3 W 0.50276(6) 0.836364(15) -0.00487(5) 0.02558(15) Uani 1 d . . . .
 W4 W 0.28833(6) 0.746471(17) -0.14383(5) 0.02957(16) Uani 1 d . . . .
 W5 W 0.57869(5) 0.765612(16) -0.09085(5) 0.02595(15) Uani 1 d . . . .
 W6 W 0.66085(5) 0.787931(15) 0.13967(5) 0.02429(16) Uani 1 d . . . .
 W7 W 0.46080(5) 0.795213(15) 0.33065(5) 0.02468(15) Uani 1 d . . . .
 W8 W 0.18820(5) 0.777006(16) 0.27925(5) 0.02613(15) Uani 1 d . . . .
 W9 W 0.09964(6) 0.751519(17) 0.03450(5) 0.03074(17) Uani 1 d . . . .
 W10 W 0.53732(5) 0.717407(15) 0.24566(5) 0.02273(14) Uani 1 d . . . .
 W11 W 0.51528(5) 0.614867(15) 0.26670(5) 0.02406(15) Uani 1 d . . . .
 W12 W 0.59530(5) 0.537422(16) 0.18006(5) 0.02738(16) Uani 1 d . . . .
 W13 W 0.86742(6) 0.555389(16) 0.23404(6) 0.03052(17) Uani 1 d . . . .
 W14 W 0.95272(6) 0.579976(18) 0.47975(6) 0.03510(19) Uani 1 d . . . .
 W15 W 0.76092(6) 0.585164(17) 0.65665(6) 0.03305(18) Uani 1 d . . . .
 W16 W 0.47199(6) 0.565633(16) 0.59945(5) 0.02901(17) Uani 1 d . . . .
 W17 W 0.39190(5) 0.543637(16) 0.36808(5) 0.02648(16) Uani 1 d . . . .
 W18 W 0.84145(6) 0.514374(16) 0.57510(6) 0.03061(17) Uani 1 d . . . .
 W19 W 0.54703(6) 0.495139(16) 0.51287(5) 0.02815(16) Uani 1 d . . . .
 W20 W 0.75377(6) 0.489368(16) 0.32463(6) 0.02977(16) Uani 1 d . . . .
 Co1 Co 0.45952(18) 0.70073(5) 0.01962(17) 0.0260(5) Uani 1 d . . . .
 Co2 Co 0.27660(17) 0.70501(5) 0.18718(16) 0.0235(5) Uani 1 d . . . .
 Co3 Co 0.68058(17) 0.66070(5) 0.11233(16) 0.0256(5) Uani 1 d . . . .
 Co4 Co 0.37037(17) 0.67133(5) 0.39909(16) 0.0253(5) Uani 1 d . . . .
 Co5 Co 0.59424(18) 0.63177(5) 0.49108(17) 0.0274(5) Uani 1 d . . . .
 Co6 Co 0.77517(18) 0.62757(5) 0.32786(17) 0.0263(5) Uani 1 d . . . .
 P1 P 0.3798(3) 0.76876(9) 0.0942(3) 0.0168(8) Uani 1 d . . . .
 P2 P 0.6707(3) 0.56293(10) 0.4167(3) 0.0212(9) Uani 1 d . . . .
 O1 O 0.2680(10) 0.8797(3) 0.2054(9) 0.037(3) Uani 1 d . . . .
 O2 O 0.5347(9) 0.8714(3) -0.0466(9) 0.037(3) Uani 1 d . . . .
 O3 O 0.1409(10) 0.8458(3) -0.1236(9) 0.042(3) Uani 1 d . . . .
 O4 O 0.2217(9) 0.8327(3) 0.0666(8) 0.034(3) Uani 1 d . . . .
 O5 O 0.3609(8) 0.8294(3) -0.0650(8) 0.028(3) Uani 1 d . . . .
 O6 O 0.4280(9) 0.8457(3) 0.1115(8) 0.030(3) Uani 1 d . . . .
 O7 O 0.2370(8) 0.7905(3) -0.1598(9) 0.032(3) Uani 1 d . . . .
 O8 O 0.5662(8) 0.8108(3) -0.0961(8) 0.030(3) Uani 1 d . . . .
 O9 O 0.6293(8) 0.8273(3) 0.0791(9) 0.030(3) Uani 1 d . . . .
 O10 O 0.4013(8) 0.8344(3) 0.2961(8) 0.031(3) Uani 1 d . . . .
 O11 O 0.1926(8) 0.8215(2) 0.2535(8) 0.024(2) Uani 1 d . . . .
 O12 O 0.0865(9) 0.7938(3) -0.0252(9) 0.031(3) Uani 1 d . . . .
 O13 O 0.1414(8) 0.7410(3) -0.0948(9) 0.032(3) Uani 1 d . . . .
 O14 O 0.2644(9) 0.7346(3) -0.2631(9) 0.033(3) Uani 1 d . . . .
 O15 O 0.4322(8) 0.7649(3) -0.1481(8) 0.026(3) Uani 1 d . . . .
 O16 O 0.6581(8) 0.7603(3) -0.1903(8) 0.028(3) Uani 1 d . . . .
 O17 O 0.6915(7) 0.7752(2) 0.0117(7) 0.022(2) Uani 1 d . . . .
 O18 O 0.5746(8) 0.8033(3) 0.2464(7) 0.025(2) Uani 1 d . . . U
 O19 O 0.7898(9) 0.7935(2) 0.1850(8) 0.031(3) Uani 1 d . . . U
 O20 O 0.5255(9) 0.8037(2) 0.4402(8) 0.028(3) Uani 1 d . . . .
 O21 O 0.3120(9) 0.7858(2) 0.3683(7) 0.026(3) Uani 1 d . . . .
 O22 O 0.0780(8) 0.7774(2) 0.3570(7) 0.024(2) Uani 1 d . . . .
 O23 O 0.1099(8) 0.7737(3) 0.1549(8) 0.026(2) Uani 1 d . . . .
 O24 O -0.0389(8) 0.7426(3) 0.0236(10) 0.038(3) Uani 1 d . . . .
 O25 O 0.4861(8) 0.7833(3) 0.0538(8) 0.028(3) Uani 1 d . . . .
 O26 O 0.2844(9) 0.7702(3) 0.0149(9) 0.031(3) Uani 1 d . . . .
 O27 O 0.3446(9) 0.7874(2) 0.1833(8) 0.025(2) Uani 1 d . . . .
 O28 O 0.2250(9) 0.7380(3) 0.2760(8) 0.028(3) Uani 1 d . . . .
 O29 O 0.1581(9) 0.7177(3) 0.0885(8) 0.032(3) Uani 1 d . . . .
 O29W O 0.7965(9) 0.6277(3) 0.0781(9) 0.036(3) Uani 1 d . . . .
 O30 O 0.3454(8) 0.7144(2) -0.0796(8) 0.024(2) Uani 1 d . . . .
 O30W O 0.7328(9) 0.6870(3) -0.0027(8) 0.029(3) Uani 1 d . . . .
 O31 O 0.5650(9) 0.7277(3) -0.0438(8) 0.032(3) Uani 1 d . . . .
 O31W O 0.2554(8) 0.7047(3) 0.4367(8) 0.028(3) Uani 1 d . . . .
 O32 O 0.6288(8) 0.7495(2) 0.1818(8) 0.027(3) Uani 1 d . . . .
 O32W O 0.3162(9) 0.6440(3) 0.5170(8) 0.034(3) Uani 1 d . . . .
 O33 O 0.4873(8) 0.7540(3) 0.3161(8) 0.027(3) Uani 1 d . . . .
 O33W O 0.3378(8) 0.6746(2) 0.0846(8) 0.027(3) Uani 1 d . . . .
 O34 O 0.6365(9) 0.7048(3) 0.3300(8) 0.033(3) Uani 1 d . . . .
 O34W O 0.7156(8) 0.6554(2) 0.4280(8) 0.026(3) Uani 1 d . . . .
 O35 O 0.5654(9) 0.6932(2) 0.1397(8) 0.027(3) Uani 1 d . . . .
 O36 O 0.4034(8) 0.7358(2) 0.1257(8) 0.023(2) Uani 1 d . . . .
 O37 O 0.4131(9) 0.6974(3) 0.2814(8) 0.027(3) Uani 1 d . . . .
 O38 O 0.6374(8) 0.6351(2) 0.2314(8) 0.027(3) Uani 1 d . . . .
 O39 O 0.4169(9) 0.6266(2) 0.1796(9) 0.028(3) Uani 1 d . . . .
 O40 O 0.4858(8) 0.6386(3) 0.3711(8) 0.028(3) Uani 1 d . . . .
 O41 O 0.4238(8) 0.5823(3) 0.3266(7) 0.024(2) Uani 1 d . . . .
 O42 O 0.4838(8) 0.6028(3) 0.5545(8) 0.027(3) Uani 1 d . . . .
 O43 O 0.5649(8) 0.5787(2) 0.1979(8) 0.026(2) Uani 1 d . . . .
 O44 O 0.8282(8) 0.5949(3) 0.2389(8) 0.029(3) Uani 1 d . . . .
 O45 O 0.8940(9) 0.6124(3) 0.4203(8) 0.032(3) Uani 1 d . . . .
 O46 O 0.7043(10) 0.6168(3) 0.5968(8) 0.038(3) Uani 1 d . . . .
 O47 O 0.7790(10) 0.5978(3) 0.7720(9) 0.042(3) Uani 1 d . . . .
 O48 O 0.9074(9) 0.5914(3) 0.6077(8) 0.033(3) Uani 1 d . . . .
 O49 O 1.0921(10) 0.5871(3) 0.4930(10) 0.042(3) Uani 1 d . . . .
 O50 O 0.9422(9) 0.5573(2) 0.3584(8) 0.030(3) Uani 1 d . . . .
 O51 O 0.9732(10) 0.5561(3) 0.1561(10) 0.041(3) Uani 1 d . . . .
 O52 O 0.7414(8) 0.5466(2) 0.1437(8) 0.023(2) Uani 1 d . . . .
 O53 O 0.5357(10) 0.5303(3) 0.0670(9) 0.035(3) Uani 1 d . . . .
 O54 O 0.4796(9) 0.5287(3) 0.2679(9) 0.034(3) Uani 1 d . . . .
 O55 O 0.2593(8) 0.5383(3) 0.3183(8) 0.028(3) Uani 1 d . . . .
 O56 O 0.3615(9) 0.5570(3) 0.4961(9) 0.035(3) Uani 1 d . . . .
 O57 O 0.3881(10) 0.5690(3) 0.6949(8) 0.033(3) Uani 1 d . . . .
 O58 O 0.6138(9) 0.5657(3) 0.6603(9) 0.031(3) Uani 1 d . . . .
 O59 O 0.6472(8) 0.5967(2) 0.3867(8) 0.023(2) Uani 1 d . . . .
 O60 O 0.7645(8) 0.5621(3) 0.4959(7) 0.026(3) Uani 1 d . . . .
 O61 O 0.7032(8) 0.5446(2) 0.3264(8) 0.025(2) Uani 1 d . . . .
 O62 O 0.5668(8) 0.5490(2) 0.4558(7) 0.022(2) Uani 1 d . . . .
 O63 O 0.4862(9) 0.5203(3) 0.6079(8) 0.030(3) Uani 1 d . . . .
 O64 O 0.4230(9) 0.5044(3) 0.4293(8) 0.030(3) Uani 1 d . . . .
 O65 O 0.6522(9) 0.4978(3) 0.2142(9) 0.035(3) Uani 1 d . . . .
 O66 O 0.8622(10) 0.5110(3) 0.2570(9) 0.039(3) Uani 1 d . . . .
 O67 O 0.9596(8) 0.5376(3) 0.5373(9) 0.036(3) Uani 1 d . . . .
 O68 O 0.8143(9) 0.5419(3) 0.6722(8) 0.032(3) Uani 1 d . . . .
 O69 O 0.6891(9) 0.5022(2) 0.5747(8) 0.027(3) Uani 1 d . . . .
 O70 O 0.8331(8) 0.4978(3) 0.4421(8) 0.032(3) Uani 1 d . . . .
 O71 O 0.6276(9) 0.4862(3) 0.4011(8) 0.032(3) Uani 1 d . . . .
 O72 O 0.7893(10) 0.4538(3) 0.3066(10) 0.045(3) Uani 1 d . . . .
 O73 O 0.5140(9) 0.4593(3) 0.5504(9) 0.034(3) Uani 1 d . . . .
 O74 O 0.9044(9) 0.4851(3) 0.6379(8) 0.030(3) Uani 1 d . . . .
 N1 N 0.5058(11) 0.6596(3) -0.0482(10) 0.028(3) Uani 1 d . . . .
 N2 N 0.5682(11) 0.6408(3) 0.0010(11) 0.032(3) Uani 1 d . . . .
 N3 N 0.8110(10) 0.6824(3) 0.2010(9) 0.019(3) Uani 1 d . . . .
 N4 N 0.8544(10) 0.6655(4) 0.2745(10) 0.031(3) Uani 1 d . . . .
 N5 N 0.4789(10) 0.6915(3) 0.5128(10) 0.031(3) Uani 1 d . . . .
 N6 N 0.5439(11) 0.6709(3) 0.5616(10) 0.032(3) Uani 1 d . . . .
 N7 N 0.1938(11) 0.6656(3) 0.2370(10) 0.029(3) Uani 1 d . . . .
 N8 N 0.2447(12) 0.6500(4) 0.3141(11) 0.037(4) Uani 1 d . . . .
 C1 C 0.4565(15) 0.6522(4) -0.1306(14) 0.037(4) Uani 1 d . . . .
 H1 H 0.4082 0.6664 -0.1624 0.045 Uiso 1 calc . . R .
 C2 C 0.473(2) 0.6230(5) -0.1749(17) 0.068(8) Uani 1 d . . . .
 H2 H 0.4461 0.6184 -0.2391 0.081 Uiso 1 calc . . R .
 C3 C 0.5296(18) 0.6027(5) -0.1188(18) 0.057(6) Uani 1 d . . . .
 H3 H 0.5339 0.5821 -0.1384 0.068 Uiso 1 calc . . R .
 C4 C 0.5813(16) 0.6122(4) -0.0326(14) 0.040(5) Uani 1 d . . . .
 H4 H 0.6270 0.5984 0.0038 0.048 Uiso 1 calc . . R .
 C5 C 0.8425(12) 0.7102(4) 0.1816(14) 0.037(5) Uani 1 d . . . .
 H5 H 0.8124 0.7202 0.1254 0.044 Uiso 1 calc . . R .
 C6 C 0.9220(13) 0.7255(4) 0.2447(13) 0.031(4) Uani 1 d . . . .
 H6 H 0.9403 0.7461 0.2333 0.037 Uiso 1 calc . . R .
 C7 C 0.9706(14) 0.7104(4) 0.3204(13) 0.035(4) Uani 1 d . . . .
 H7 H 1.0245 0.7198 0.3628 0.042 Uiso 1 calc . . R .
 C8 C 0.9366(14) 0.6790(4) 0.3343(16) 0.042(5) Uani 1 d . . . .
 H8 H 0.9714 0.6674 0.3853 0.050 Uiso 1 calc . . R .
 C9 C 0.5804(13) 0.6784(3) 0.6528(13) 0.031(4) Uani 1 d . . . .
 H9 H 0.6233 0.6638 0.6889 0.038 Uiso 1 calc . . R .
 C10 C 0.5592(16) 0.7056(4) 0.6963(14) 0.040(5) Uani 1 d . . . .
 H10 H 0.5845 0.7095 0.7613 0.048 Uiso 1 calc . . R .
 C11 C 0.5000(13) 0.7271(5) 0.6429(13) 0.037(5) Uani 1 d . . . .
 H11 H 0.4842 0.7466 0.6687 0.044 Uiso 1 calc . . R .
 C12 C 0.4654(14) 0.7189(4) 0.5505(13) 0.036(4) Uani 1 d . . . U
 H12 H 0.4292 0.7338 0.5107 0.043 Uiso 1 calc . . R .
 C13 C 0.2099(15) 0.6213(4) 0.3255(13) 0.036(4) Uani 1 d . . . .
 H13 H 0.2462 0.6095 0.3748 0.043 Uiso 1 calc . . R .
 C14 C 0.1268(14) 0.6082(4) 0.2716(14) 0.035(4) Uani 1 d . . . U
 H14 H 0.1017 0.5884 0.2863 0.042 Uiso 1 calc . . R .
 C15 C 0.0817(13) 0.6237(4) 0.1979(13) 0.035(4) Uani 1 d . . . .
 H15 H 0.0252 0.6149 0.1568 0.043 Uiso 1 calc . . R .
 C16 C 0.1175(12) 0.6525(4) 0.1819(11) 0.026(4) Uani 1 d . . . .
 H16 H 0.0855 0.6635 0.1283 0.031 Uiso 1 calc . . R .
 Co7 Co 0.14443(17) 0.41463(5) 0.45038(16) 0.0273(5) Uani 1 d . . . .
 Co8 Co 0.26797(17) 0.34993(5) 0.35561(16) 0.0276(5) Uani 1 d . . . .
 Co9 Co 0.08758(17) 0.34829(5) 0.54337(16) 0.0271(5) Uani 1 d . . . .
 O35W O 0.1549(10) 0.4592(2) 0.4948(8) 0.034(3) Uani 1 d . . . .
 O36W O 0.0544(10) 0.4276(3) 0.3191(9) 0.051(4) Uani 1 d . . . .
 O37W O 0.1716(9) 0.3445(3) 0.2298(9) 0.040(3) Uani 1 d . . . .
 O38W O -0.0364(9) 0.3232(3) 0.4680(9) 0.044(3) Uani 1 d . . . .
 O39W O 0.3938(9) 0.3287(3) 0.2832(8) 0.037(3) Uani 1 d . . . .
 O40W O 0.0420(8) 0.3288(3) 0.6682(8) 0.031(3) Uani 1 d . . . .
 O41W O 0.3856(8) 0.3554(2) 0.4717(7) 0.023(2) Uani 1 d . . . .
 O75 O 0.1315(8) 0.3689(2) 0.4181(7) 0.027(2) Uani 1 d . . . .
 N9 N 0.2904(10) 0.4182(3) 0.3641(10) 0.029(3) Uani 1 d . . . .
 N10 N 0.3190(10) 0.3944(3) 0.3119(10) 0.033(3) Uani 1 d . . . .
 N11 N 0.2282(11) 0.3067(3) 0.4279(9) 0.028(3) Uani 1 d . . . .
 N12 N 0.1906(10) 0.3084(3) 0.5174(9) 0.024(3) Uani 1 d . . . .
 N13 N 0.2157(10) 0.3735(3) 0.6155(10) 0.029(3) Uani 1 d . . . .
 N14 N 0.2410(10) 0.4007(3) 0.5790(9) 0.024(3) Uani 1 d . . . .
 N15 N -0.0325(11) 0.3828(3) 0.5574(10) 0.032(3) Uani 1 d . . . .
 N16 N -0.0128(10) 0.4096(3) 0.5149(9) 0.026(3) Uani 1 d . . . .
 C17 C 0.3903(15) 0.3994(4) 0.2405(12) 0.042(5) Uani 1 d . . . .
 H17 H 0.4094 0.3826 0.2014 0.050 Uiso 1 calc . . R .
 C18 C 0.4350(15) 0.4262(4) 0.2217(15) 0.044(5) Uani 1 d . . . .
 H18 H 0.4837 0.4281 0.1700 0.053 Uiso 1 calc . . R .
 C19 C 0.4116(15) 0.4505(4) 0.2754(15) 0.046(5) Uani 1 d . . . .
 H19 H 0.4440 0.4698 0.2648 0.055 Uiso 1 calc . . R .
 C20 C 0.3381(13) 0.4460(3) 0.3467(12) 0.031(4) Uani 1 d . . . .
 H20 H 0.3192 0.4628 0.3858 0.037 Uiso 1 calc . . R .
 C21 C 0.2590(14) 0.2804(4) 0.3939(13) 0.041(4) Uani 1 d . . . .
 H21 H 0.2815 0.2784 0.3292 0.049 Uiso 1 calc . . R .
 C22 C 0.2574(13) 0.2555(4) 0.4563(14) 0.036(4) Uani 1 d . . . .
 H22 H 0.2733 0.2360 0.4311 0.044 Uiso 1 calc . . R .
 C23 C 0.2351(14) 0.2577(4) 0.5477(11) 0.031(4) Uani 1 d . . . .
 H23 H 0.2439 0.2414 0.5928 0.037 Uiso 1 calc . . R .
 C24 C 0.1973(14) 0.2863(5) 0.5719(12) 0.042(5) Uani 1 d . . . .
 H24 H 0.1745 0.2890 0.6363 0.050 Uiso 1 calc . . R .
 C25 C 0.3255(13) 0.4162(4) 0.6143(13) 0.037(4) Uani 1 d . . . .
 H25 H 0.3401 0.4358 0.5891 0.044 Uiso 1 calc . . R .
 C26 C 0.3964(16) 0.4040(5) 0.6903(14) 0.044(5) Uani 1 d . . . .
 H26 H 0.4603 0.4148 0.7133 0.053 Uiso 1 calc . . R .
 C27 C 0.3725(12) 0.3782(4) 0.7271(12) 0.030(4) Uani 1 d . . . .
 H27 H 0.4162 0.3703 0.7802 0.036 Uiso 1 calc . . R .
 C28 C 0.2795(12) 0.3615(4) 0.6878(11) 0.029(4) Uani 1 d . . . .
 H28 H 0.2631 0.3421 0.7128 0.035 Uiso 1 calc . . R .
 C29 C -0.1348(13) 0.3775(5) 0.5909(13) 0.042(5) Uani 1 d . . . .
 H29 H -0.1492 0.3586 0.6208 0.050 Uiso 1 calc . . R .
 C30 C -0.2183(13) 0.3991(5) 0.5824(13) 0.042(5) Uani 1 d . . . .
 H30 H -0.2900 0.3948 0.6039 0.050 Uiso 1 calc . . R .
 C31 C -0.1954(16) 0.4266(4) 0.5425(15) 0.048(5) Uani 1 d . . . .
 H31 H -0.2476 0.4427 0.5426 0.057 Uiso 1 calc . . R .
 C32 C -0.0952(13) 0.4304(4) 0.5025(15) 0.041(5) Uani 1 d . . . .
 H32 H -0.0828 0.4481 0.4651 0.049 Uiso 1 calc . . R .
 Na1 Na 0.2990(4) 0.49958(15) 0.8704(4) 0.0287(14) Uani 1 d . . . U
 O42W O 0.336(2) 0.4975(7) 0.730(2) 0.168(11) Uiso 1 d . . D U
 O43W O 0.296(3) 0.5436(9) 0.866(3) 0.217(15) Uiso 1 d . . D .
 O44W O 0.285(4) 0.5057(11) 1.033(4) 0.40(4) Uiso 1 d . . D .
 O45W O 0.290(3) 0.4563(7) 0.912(2) 0.193(13) Uiso 1 d . . D U
 O46W O 0.150(4) 0.5048(11) 0.816(3) 0.255(19) Uiso 1 d . . . U
 O49W O 0.452(2) 0.4997(8) 0.906(2) 0.37(3) Uiso 1 d . . D .
 O4W O 0.295(3) 0.6723(8) 0.689(3) 0.069(10) Uiso 0.50 d . . . .
 O4WA O 0.237(3) 0.6754(8) 0.677(3) 0.065(9) Uiso 0.50 d . . . .
 O3W O 0.905(4) 0.6892(12) 0.740(4) 0.065(14) Uiso 0.30 d . . . U
 O3WA O 0.8285(19) 0.6989(6) 0.7174(17) 0.071(6) Uiso 0.70 d . . . U
 O2W O 0.798(3) 0.5433(10) 0.949(3) 0.085(12) Uiso 0.50 d . . . U
 O2WA O 0.741(4) 0.5517(10) 0.928(3) 0.097(13) Uiso 0.50 d . . . U
 O5W O 0.177(3) 0.4569(10) 0.150(3) 0.091(12) Uiso 0.50 d . . . .
 O5WA O 0.219(4) 0.4561(11) 0.098(4) 0.105(14) Uiso 0.50 d . . . .
 O1W O 0.930(3) 0.4008(9) 0.898(3) 0.081(10) Uiso 0.50 d . . . U
 O1WA O 0.902(3) 0.4216(10) 0.881(3) 0.089(11) Uiso 0.50 d . . . U
 O6W O 0.641(3) 0.5110(10) 0.803(3) 0.085(12) Uiso 0.50 d . . . .
 O6WA O 0.622(3) 0.5289(9) 0.827(3) 0.079(10) Uiso 0.50 d . . . .
 O7W O 0.8765(12) 0.6676(4) 0.5588(9) 0.077(5) Uani 1 d . . . .
 O8W O 0.7676(17) 0.6568(4) 0.8373(12) 0.087(6) Uani 1 d . . . .
 O9W O 0.961(2) 0.4744(5) 0.119(2) 0.151(12) Uani 1 d . . . .
 O10W O 0.6461(16) 0.4556(4) 0.0594(12) 0.083(5) Uani 1 d . . . .
 O11W O 0.9166(15) 0.4144(4) 0.0899(17) 0.104(7) Uani 1 d . . . .
 O12W O 0.6973(10) 0.3999(3) 0.1347(10) 0.049(3) Uani 1 d . . . .
 O13W O 0.9167(11) 0.3687(4) 0.3115(10) 0.070(5) Uani 1 d . . . .
 O14W O 0.6889(9) 0.3823(3) 0.3322(10) 0.048(3) Uani 1 d . . . .
 O15W O 0.1392(15) 0.3927(4) 0.1072(12) 0.080(5) Uani 1 d . . . .
 O16W O 0.6156(10) 0.3216(3) 0.3032(10) 0.044(3) Uani 1 d . . . .
 O17W O 0.9524(13) 0.2648(3) 0.4073(10) 0.061(4) Uani 1 d . . . .
 O18W O 0.1288(10) 0.2975(3) 0.1083(10) 0.054(4) Uani 1 d . . . .
 O19W O 0.7071(12) 0.2803(4) 0.4293(10) 0.059(4) Uani 1 d . . . .
 O20W O 0.0414(12) 0.2503(4) 0.2263(11) 0.064(4) Uiso 1 d . . . .
 O21W O 0.0193(15) 0.3358(5) 0.8659(14) 0.107(8) Uani 1 d . . . .
 O22W O 0.1959(12) 0.3681(4) 0.9361(11) 0.064(4) Uani 1 d . . . .
 O23W O 0.114(3) 0.4142(9) 0.830(3) 0.213(15) Uiso 1 d . . . .
 O24W O 0.0998(19) 0.4605(6) 0.6895(18) 0.124(8) Uiso 1 d . . . .
 O25W O 0.0816(10) 0.4994(4) 0.3661(11) 0.063(5) Uani 1 d . . . .
 O26W O 0.1837(12) 0.5278(5) 0.5949(14) 0.087(6) Uani 1 d . . . .
 O27W O 0.9559(14) 0.5024(3) 0.9550(12) 0.073(5) Uani 1 d . . . .
 O28W O 0.0779(11) 0.6996(3) 0.5482(9) 0.055(4) Uani 1 d . . . .
 O47W O 0.5362(9) 0.4005(3) 0.4622(9) 0.042(3) Uani 1 d . . . .
 O48W O 0.206(3) 0.5469(8) 1.125(2) 0.186(13) Uiso 1 d . . . .

loop_
  _atom_site_aniso_label
  _atom_site_aniso_U_11
  _atom_site_aniso_U_22
  _atom_site_aniso_U_33
  _atom_site_aniso_U_23
  _atom_site_aniso_U_13
  _atom_site_aniso_U_12
 W1 0.0277(4) 0.0262(4) 0.0276(4) 0.0041(3) 0.0005(3) 0.0012(3)
 W2 0.0320(4) 0.0211(4) 0.0287(4) 0.0012(3) 0.0046(3) 0.0014(3)
 W3 0.0282(4) 0.0230(4) 0.0257(4) 0.0016(3) 0.0033(3) -0.0012(3)
 W4 0.0316(4) 0.0294(4) 0.0276(4) -0.0001(3) -0.0006(3) -0.0002(3)
 W5 0.0281(4) 0.0254(4) 0.0245(4) -0.0001(3) 0.0023(3) -0.0011(3)
 W6 0.0251(3) 0.0228(4) 0.0249(4) 0.0004(3) 0.0002(3) -0.0024(3)
 W7 0.0292(3) 0.0212(4) 0.0237(4) -0.0015(3) 0.0020(3) -0.0007(3)
 W8 0.0270(3) 0.0224(4) 0.0293(4) 0.0008(3) 0.0044(3) 0.0011(3)
 W9 0.0286(4) 0.0307(4) 0.0327(4) 0.0039(3) -0.0003(3) -0.0008(3)
 W10 0.0248(3) 0.0200(4) 0.0233(4) -0.0002(3) 0.0004(3) -0.0004(3)
 W11 0.0243(3) 0.0215(4) 0.0264(4) -0.0003(3) 0.0009(3) -0.0002(3)
 W12 0.0305(4) 0.0222(4) 0.0296(4) -0.0028(3) 0.0032(3) -0.0005(3)
 W13 0.0298(4) 0.0241(4) 0.0381(4) 0.0015(3) 0.0061(3) 0.0011(3)
 W14 0.0296(4) 0.0306(4) 0.0446(5) 0.0048(4) -0.0032(3) -0.0018(3)
 W15 0.0361(4) 0.0285(4) 0.0340(4) 0.0004(3) -0.0050(3) -0.0010(3)
 W16 0.0331(4) 0.0244(4) 0.0297(4) -0.0006(3) 0.0028(3) 0.0000(3)
 W17 0.0260(3) 0.0236(4) 0.0299(4) -0.0002(3) 0.0017(3) -0.0027(3)
 W18 0.0296(4) 0.0244(4) 0.0375(4) 0.0050(3) -0.0014(3) 0.0012(3)
 W19 0.0308(4) 0.0204(4) 0.0335(4) 0.0011(3) 0.0043(3) -0.0019(3)
 W20 0.0323(4) 0.0214(4) 0.0360(4) 0.0004(3) 0.0062(3) 0.0018(3)
 Co1 0.0283(12) 0.0218(12) 0.0279(13) 0.0022(10) 0.0011(10) 0.0012(9)
 Co2 0.0247(11) 0.0203(12) 0.0253(12) -0.0002(9) -0.0011(9) 0.0013(9)
 Co3 0.0264(11) 0.0226(13) 0.0278(12) 0.0003(10) 0.0033(9) 0.0009(9)
 Co4 0.0287(11) 0.0208(12) 0.0266(12) -0.0004(10) 0.0020(9) 0.0009(9)
 Co5 0.0286(12) 0.0239(13) 0.0295(13) -0.0019(10) -0.0014(10) 0.0012(9)
 Co6 0.0267(11) 0.0230(13) 0.0290(13) 0.0023(10) 0.0004(9) 0.0006(9)
 P1 0.0199(18) 0.016(2) 0.0149(19) 0.0007(16) 0.0012(15) 0.0015(15)
 P2 0.0197(19) 0.017(2) 0.027(2) 0.0018(18) 0.0000(16) -0.0010(16)
 O1 0.047(7) 0.029(7) 0.034(7) 0.007(6) 0.002(6) -0.004(6)
 O2 0.037(7) 0.034(7) 0.039(7) -0.009(6) -0.003(5) -0.003(5)
 O3 0.046(7) 0.045(9) 0.034(7) 0.003(6) -0.004(6) -0.005(6)
 O4 0.034(6) 0.035(7) 0.032(7) -0.006(6) 0.001(5) 0.000(5)
 O5 0.020(6) 0.035(7) 0.027(6) 0.009(5) 0.000(5) -0.003(5)
 O6 0.033(6) 0.023(7) 0.034(7) -0.002(5) 0.009(5) -0.002(5)
 O7 0.023(6) 0.029(7) 0.045(7) 0.022(6) -0.005(5) 0.002(5)
 O8 0.026(6) 0.039(7) 0.025(6) -0.010(5) 0.008(5) -0.007(5)
 O9 0.015(5) 0.024(6) 0.052(8) 0.005(6) 0.003(5) -0.001(4)
 O10 0.025(6) 0.034(7) 0.036(7) -0.002(6) 0.008(5) -0.007(5)
 O11 0.020(5) 0.021(6) 0.030(6) 0.007(5) -0.002(4) 0.000(4)
 O12 0.029(6) 0.023(6) 0.043(7) -0.004(5) 0.015(5) -0.007(5)
 O13 0.025(6) 0.026(7) 0.045(8) 0.017(6) 0.008(5) -0.007(5)
 O14 0.033(6) 0.020(6) 0.044(8) 0.004(5) 0.003(5) 0.003(5)
 O15 0.017(5) 0.038(7) 0.023(6) 0.004(5) 0.001(4) 0.002(5)
 O16 0.025(6) 0.030(7) 0.030(6) 0.004(5) 0.001(5) 0.000(5)
 O17 0.019(5) 0.023(6) 0.024(6) 0.003(5) -0.004(4) -0.007(4)
 O18 0.021(4) 0.034(5) 0.020(4) 0.002(4) 0.012(4) -0.002(4)
 O19 0.048(7) 0.013(6) 0.032(7) 0.006(5) 0.019(5) 0.007(5)
 O20 0.035(6) 0.023(6) 0.028(6) 0.003(5) 0.008(5) -0.001(5)
 O21 0.045(7) 0.020(6) 0.014(5) 0.003(5) 0.008(5) 0.009(5)
 O22 0.037(6) 0.016(6) 0.021(6) 0.005(5) 0.010(5) -0.006(5)
 O23 0.018(5) 0.027(7) 0.031(6) -0.001(5) 0.004(4) 0.003(5)
 O24 0.005(5) 0.048(8) 0.060(9) 0.001(7) -0.003(5) -0.009(5)
 O25 0.025(6) 0.026(7) 0.033(7) -0.004(5) 0.010(5) 0.000(5)
 O26 0.031(6) 0.016(6) 0.046(8) 0.003(6) 0.000(5) 0.000(5)
 O27 0.036(6) 0.009(6) 0.029(6) 0.010(5) 0.004(5) 0.001(4)
 O28 0.031(6) 0.031(7) 0.025(6) -0.001(5) 0.014(5) -0.008(5)
 O29 0.038(6) 0.021(6) 0.034(7) 0.000(5) -0.015(5) -0.008(5)
 O29W 0.032(6) 0.026(7) 0.050(8) 0.011(6) 0.009(6) 0.011(5)
 O30 0.023(5) 0.015(6) 0.033(6) -0.006(5) -0.002(5) -0.006(4)
 O30W 0.034(6) 0.031(7) 0.024(6) 0.003(5) 0.008(5) 0.000(5)
 O31 0.042(7) 0.020(6) 0.033(7) -0.005(5) 0.003(5) 0.011(5)
 O31W 0.028(6) 0.030(7) 0.027(6) -0.002(5) 0.004(5) 0.011(5)
 O32 0.022(5) 0.019(6) 0.039(7) 0.000(5) 0.004(5) 0.001(5)
 O32W 0.044(7) 0.034(7) 0.023(6) 0.000(5) 0.009(5) 0.003(5)
 O33 0.026(6) 0.031(7) 0.025(6) 0.002(5) 0.007(5) 0.002(5)
 O33W 0.030(6) 0.020(6) 0.032(7) -0.003(5) 0.011(5) -0.006(5)
 O34 0.034(6) 0.040(8) 0.027(6) 0.001(6) 0.011(5) -0.006(5)
 O34W 0.025(6) 0.018(6) 0.036(7) -0.006(5) -0.003(5) 0.000(4)
 O35 0.036(6) 0.019(6) 0.026(6) -0.005(5) 0.008(5) -0.004(5)
 O36 0.026(5) 0.020(6) 0.021(6) 0.000(5) -0.006(4) 0.003(4)
 O37 0.031(6) 0.023(6) 0.029(6) -0.004(5) 0.007(5) -0.005(5)
 O38 0.027(6) 0.020(6) 0.034(7) -0.009(5) -0.002(5) -0.005(5)
 O39 0.028(6) 0.017(6) 0.039(7) -0.007(5) -0.006(5) -0.001(5)
 O40 0.016(5) 0.027(7) 0.041(7) 0.012(5) -0.003(5) 0.006(4)
 O41 0.021(5) 0.033(7) 0.019(6) -0.003(5) 0.000(4) -0.002(5)
 O42 0.020(5) 0.037(7) 0.025(6) -0.002(5) -0.002(5) 0.000(5)
 O43 0.030(6) 0.015(6) 0.031(6) -0.004(5) 0.004(5) -0.010(5)
 O44 0.024(6) 0.033(7) 0.028(6) 0.003(5) -0.008(5) 0.000(5)
 O45 0.030(6) 0.036(7) 0.030(7) 0.002(6) 0.004(5) 0.006(5)
 O46 0.053(8) 0.035(8) 0.026(7) -0.003(6) 0.016(6) -0.005(6)
 O47 0.046(8) 0.046(9) 0.032(7) -0.001(6) -0.012(6) 0.000(6)
 O48 0.034(6) 0.029(7) 0.034(7) -0.005(5) -0.005(5) -0.012(5)
 O49 0.037(7) 0.037(8) 0.053(9) 0.014(7) 0.012(6) 0.006(6)
 O50 0.045(7) 0.012(6) 0.032(7) 0.009(5) -0.007(5) -0.006(5)
 O51 0.038(7) 0.031(8) 0.054(8) -0.003(6) 0.000(6) 0.013(6)
 O52 0.018(5) 0.021(6) 0.032(6) -0.004(5) -0.001(4) 0.002(4)
 O53 0.044(7) 0.025(7) 0.035(7) -0.005(5) 0.010(5) 0.001(5)
 O54 0.032(6) 0.034(7) 0.034(7) -0.004(5) -0.007(5) -0.009(5)
 O55 0.020(6) 0.043(8) 0.020(6) -0.008(5) -0.005(4) -0.005(5)
 O56 0.033(6) 0.019(6) 0.053(8) -0.005(6) 0.013(6) 0.002(5)
 O57 0.050(7) 0.027(7) 0.023(6) -0.011(5) 0.005(5) -0.009(5)
 O58 0.037(7) 0.018(6) 0.041(7) -0.009(5) 0.017(5) -0.008(5)
 O59 0.028(6) 0.019(6) 0.021(6) -0.002(5) -0.001(4) 0.008(4)
 O60 0.019(5) 0.038(7) 0.020(6) -0.004(5) -0.011(4) 0.001(5)
 O61 0.024(6) 0.027(7) 0.024(6) -0.010(5) 0.006(4) 0.000(5)
 O62 0.029(6) 0.015(6) 0.021(6) -0.006(5) -0.006(4) 0.004(4)
 O63 0.035(6) 0.029(7) 0.027(6) 0.004(5) 0.003(5) 0.005(5)
 O64 0.038(7) 0.026(7) 0.028(7) -0.007(5) 0.012(5) -0.017(5)
 O65 0.042(7) 0.024(7) 0.038(7) -0.004(6) -0.011(6) -0.001(5)
 O66 0.043(7) 0.031(8) 0.041(8) -0.011(6) -0.001(6) 0.007(6)
 O67 0.019(6) 0.036(7) 0.054(8) 0.007(6) 0.000(5) -0.001(5)
 O68 0.046(7) 0.028(7) 0.020(6) 0.006(5) -0.005(5) 0.008(5)
 O69 0.035(6) 0.021(6) 0.026(6) -0.006(5) 0.004(5) 0.003(5)
 O70 0.024(6) 0.037(7) 0.034(7) -0.003(6) 0.000(5) 0.011(5)
 O71 0.039(7) 0.026(7) 0.032(7) 0.003(5) 0.003(5) -0.007(5)
 O72 0.038(7) 0.049(9) 0.048(8) -0.004(7) 0.002(6) -0.008(6)
 O73 0.039(7) 0.030(7) 0.033(7) 0.000(6) 0.006(5) -0.001(5)
 O74 0.032(6) 0.024(7) 0.035(7) 0.000(5) 0.009(5) 0.006(5)
 N1 0.033(8) 0.023(8) 0.029(8) -0.001(6) 0.007(6) -0.008(6)
 N2 0.023(7) 0.035(9) 0.037(9) 0.002(7) 0.005(6) -0.018(6)
 N3 0.030(7) 0.013(7) 0.015(7) 0.005(5) -0.001(5) -0.004(5)
 N4 0.021(7) 0.039(9) 0.035(9) -0.002(7) 0.008(6) -0.002(6)
 N5 0.017(7) 0.042(10) 0.032(8) -0.001(7) -0.007(6) 0.009(6)
 N6 0.040(8) 0.033(9) 0.022(8) 0.005(6) -0.007(6) 0.003(7)
 N7 0.033(7) 0.022(8) 0.033(8) 0.008(6) 0.009(6) 0.009(6)
 N8 0.041(9) 0.034(9) 0.037(9) -0.009(7) 0.017(7) 0.014(7)
 C1 0.041(10) 0.036(11) 0.035(11) -0.004(9) 0.000(8) -0.001(8)
 C2 0.092(17) 0.046(14) 0.060(15) -0.037(12) -0.046(14) 0.019(13)
 C3 0.057(13) 0.044(14) 0.069(16) -0.010(12) -0.010(12) -0.004(10)
 C4 0.056(11) 0.022(10) 0.042(11) -0.004(8) 0.007(9) -0.001(8)
 C5 0.013(8) 0.045(12) 0.053(12) -0.002(10) 0.011(7) -0.012(7)
 C6 0.028(8) 0.020(9) 0.045(11) -0.001(8) 0.021(7) 0.002(7)
 C7 0.029(9) 0.041(12) 0.036(10) 0.009(9) -0.002(7) 0.000(8)
 C8 0.029(9) 0.026(10) 0.073(15) 0.014(10) 0.020(9) 0.005(8)
 C9 0.040(9) 0.008(8) 0.043(11) 0.002(7) -0.030(8) -0.008(7)
 C10 0.065(12) 0.019(10) 0.034(10) -0.005(8) -0.006(9) -0.016(9)
 C11 0.027(8) 0.046(12) 0.037(11) -0.025(9) 0.000(7) -0.013(8)
 C12 0.040(6) 0.032(6) 0.036(6) -0.004(5) 0.001(5) -0.005(5)
 C13 0.045(11) 0.030(11) 0.032(10) -0.001(8) 0.007(8) 0.005(8)
 C14 0.034(6) 0.029(6) 0.042(6) 0.003(5) -0.001(5) -0.003(5)
 C15 0.024(8) 0.051(12) 0.032(10) -0.011(9) 0.001(7) -0.025(8)
 C16 0.023(8) 0.038(11) 0.016(8) 0.001(7) -0.008(6) -0.004(7)
 Co7 0.0318(11) 0.0220(12) 0.0283(12) 0.0013(9) 0.0047(9) 0.0013(9)
 Co8 0.0330(11) 0.0230(12) 0.0272(12) -0.0009(9) 0.0046(9) -0.0001(9)
 Co9 0.0289(11) 0.0232(12) 0.0293(12) 0.0024(9) 0.0027(9) -0.0007(9)
 O35W 0.059(7) 0.011(6) 0.033(7) 0.002(5) 0.011(6) 0.004(5)
 O36W 0.045(7) 0.063(10) 0.044(8) 0.020(7) 0.004(6) 0.003(7)
 O37W 0.034(6) 0.047(8) 0.039(7) -0.005(6) 0.005(5) 0.007(6)
 O38W 0.037(7) 0.047(9) 0.048(8) -0.007(6) -0.001(6) -0.007(6)
 O39W 0.041(6) 0.050(8) 0.022(6) -0.010(5) 0.007(5) -0.001(6)
 O40W 0.030(6) 0.029(6) 0.034(7) 0.000(5) 0.004(5) -0.001(5)
 O41W 0.026(5) 0.016(5) 0.026(6) 0.003(4) 0.001(4) 0.003(4)
 O75 0.024(5) 0.029(6) 0.026(6) 0.004(5) -0.005(4) 0.000(4)
 N9 0.023(6) 0.022(7) 0.040(8) -0.004(6) -0.012(6) -0.002(5)
 N10 0.031(7) 0.024(8) 0.044(9) -0.021(7) -0.005(6) 0.004(6)
 N11 0.044(8) 0.019(7) 0.020(7) 0.005(6) 0.000(6) -0.002(6)
 N12 0.037(7) 0.015(7) 0.020(7) -0.004(5) -0.008(5) 0.005(5)
 N13 0.026(7) 0.028(8) 0.031(8) 0.015(6) -0.003(6) 0.003(6)
 N14 0.026(6) 0.016(7) 0.030(7) 0.002(6) 0.002(5) 0.008(5)
 N15 0.035(7) 0.034(8) 0.029(8) 0.009(6) 0.014(6) 0.016(6)
 N16 0.029(7) 0.031(8) 0.018(7) 0.000(6) -0.002(5) 0.005(6)
 C17 0.060(11) 0.040(11) 0.026(9) -0.024(8) 0.010(8) 0.002(9)
 C18 0.041(10) 0.034(12) 0.059(13) 0.012(10) 0.018(9) -0.005(8)
 C19 0.049(11) 0.029(11) 0.059(13) 0.017(10) -0.007(10) -0.021(9)
 C20 0.046(9) 0.009(8) 0.039(10) 0.000(7) 0.014(8) -0.010(7)
 C21 0.046(10) 0.044(12) 0.033(10) -0.012(9) 0.004(8) 0.008(9)
 C22 0.043(10) 0.012(8) 0.055(12) 0.001(8) 0.011(8) 0.006(7)
 C23 0.053(10) 0.017(8) 0.024(9) 0.015(7) 0.002(7) 0.003(7)
 C24 0.048(10) 0.066(14) 0.010(8) 0.012(9) -0.007(7) -0.009(9)
 C25 0.031(8) 0.031(10) 0.049(11) 0.017(8) 0.002(8) -0.014(7)
 C26 0.046(11) 0.048(13) 0.038(11) 0.004(9) 0.000(9) -0.030(9)
 C27 0.022(7) 0.039(11) 0.028(9) -0.015(8) 0.001(7) -0.003(7)
 C28 0.025(7) 0.040(10) 0.021(8) -0.010(7) -0.002(6) -0.002(7)
 C29 0.026(8) 0.058(13) 0.041(11) 0.016(9) -0.005(8) -0.001(8)
 C30 0.028(8) 0.065(14) 0.032(10) 0.006(9) 0.003(7) 0.000(8)
 C31 0.050(11) 0.032(11) 0.061(14) 0.000(10) 0.011(10) 0.010(9)
 C32 0.031(9) 0.026(10) 0.065(13) -0.010(9) 0.003(8) 0.008(7)
 Na1 0.025(3) 0.036(4) 0.026(3) 0.000(3) 0.005(2) -0.002(3)
 O7W 0.077(10) 0.137(16) 0.016(7) 0.002(8) -0.012(7) -0.044(10)
 O8W 0.157(18) 0.059(12) 0.048(10) -0.018(8) 0.034(10) -0.022(11)
 O9W 0.18(2) 0.074(15) 0.21(3) -0.055(16) 0.15(2) -0.030(15)
 O10W 0.145(16) 0.046(10) 0.056(10) 0.009(8) -0.006(10) 0.021(10)
 O11W 0.080(12) 0.063(13) 0.17(2) 0.003(13) 0.051(13) 0.007(10)
 O12W 0.055(8) 0.035(8) 0.057(9) -0.011(7) 0.011(7) -0.002(6)
 O13W 0.047(8) 0.120(15) 0.042(8) -0.035(9) -0.011(7) 0.012(8)
 O14W 0.026(6) 0.051(9) 0.066(9) -0.009(7) -0.002(6) -0.002(6)
 O15W 0.113(13) 0.063(11) 0.064(11) 0.033(9) 0.011(10) 0.010(10)
 O16W 0.047(7) 0.036(8) 0.051(8) -0.002(6) 0.015(6) 0.003(6)
 O17W 0.091(11) 0.041(9) 0.051(9) 0.004(7) -0.010(8) 0.017(8)
 O18W 0.036(7) 0.064(10) 0.060(9) -0.037(8) -0.009(6) 0.007(6)
 O19W 0.063(9) 0.061(10) 0.051(9) 0.004(8) -0.001(7) 0.005(8)
 O21W 0.086(13) 0.16(2) 0.082(13) -0.053(13) 0.038(10) -0.064(13)
 O22W 0.063(9) 0.074(11) 0.054(9) -0.020(8) -0.003(7) 0.015(8)
 O25W 0.029(7) 0.099(13) 0.061(10) 0.020(9) -0.006(6) -0.011(7)
 O26W 0.037(8) 0.127(17) 0.096(14) 0.043(12) -0.009(8) -0.005(9)
 O27W 0.104(13) 0.044(9) 0.077(12) 0.019(8) 0.058(10) 0.027(9)
 O28W 0.064(9) 0.067(10) 0.034(7) -0.004(7) 0.007(6) -0.005(7)
 O47W 0.038(6) 0.031(7) 0.060(8) -0.010(6) 0.024(6) -0.014(5)

_geom_special_details
;
 All esds (except the esd in the dihedral angle between two l.s. planes) 
 are estimated using the full covariance matrix.  The cell esds are taken 
 into account individually in the estimation of esds in distances, angles 
 and torsion angles; correlations between esds in cell parameters are only 
 used when they are defined by crystal symmetry.  An approximate (isotropic) 
 treatment of cell esds is used for estimating esds involving l.s. planes. 
;
loop_
  _geom_bond_atom_site_label_1
  _geom_bond_atom_site_label_2
  _geom_bond_distance
  _geom_bond_site_symmetry_2
  _geom_bond_publ_flag
 W1 O3 1.684(13) . ?
 W1 O4 1.916(12) . ?
 W1 O5 1.950(10) . ?
 W1 O7 1.833(13) . ?
 W1 O12 1.879(10) . ?
 W1 O26 2.504(11) . ?
 W2 O1 1.720(12) . ?
 W2 O4 1.908(12) . ?
 W2 O6 1.911(11) . ?
 W2 O10 1.935(12) . ?
 W2 O11 1.869(10) . ?
 W2 O27 2.476(10) . ?
 W3 O2 1.699(13) . ?
 W3 O5 1.897(10) . ?
 W3 O6 1.924(11) . ?
 W3 O8 1.879(11) . ?
 W3 O9 1.919(11) . ?
 W3 O25 2.485(11) . ?
 W4 O7 2.044(11) . ?
 W4 O13 1.951(10) . ?
 W4 O14 1.736(13) . ?
 W4 O15 1.927(10) . ?
 W4 O26 2.428(12) . ?
 W4 O30 1.789(11) . ?
 W5 O8 1.999(12) . ?
 W5 O15 1.909(10) . ?
 W5 O16 1.728(11) . ?
 W5 O17 1.966(10) . ?
 W5 O25 2.462(10) . ?
 W5 O31 1.804(12) . ?
 W6 O9 1.956(11) . ?
 W6 O17 1.905(10) . ?
 W6 O18 1.967(10) . ?
 W6 O19 1.673(12) . ?
 W6 O25 2.385(11) . ?
 W6 O32 1.837(11) . ?
 W7 O10 1.921(12) . ?
 W7 O18 1.880(9) . ?
 W7 O20 1.710(11) . ?
 W7 O21 1.945(11) . ?
 W7 O27 2.440(11) . ?
 W7 O33 1.858(12) . ?
 W8 O11 1.994(10) . ?
 W8 O21 1.932(11) . ?
 W8 O22 1.752(10) . ?
 W8 O23 1.925(11) . ?
 W8 O27 2.406(10) . ?
 W8 O28 1.779(12) . ?
 W9 O12 2.039(12) . ?
 W9 O13 1.933(12) . ?
 W9 O23 1.925(11) . ?
 W9 O24 1.725(10) . ?
 W9 O26 2.413(11) . ?
 W9 O29 1.795(11) . ?
 W10 O32 2.025(11) . ?
 W10 O33 1.991(11) . ?
 W10 O34 1.724(12) . ?
 W10 O35 1.854(11) . ?
 W10 O36 2.402(10) . ?
 W10 O37 1.833(11) . ?
 W11 O38 1.815(11) . ?
 W11 O39 1.730(11) . ?
 W11 O40 1.828(12) . ?
 W11 O41 2.015(11) . ?
 W11 O43 1.966(11) . ?
 W11 O59 2.384(10) . ?
 W12 O43 1.873(11) . ?
 W12 O52 1.907(10) . ?
 W12 O53 1.715(12) . ?
 W12 O54 1.935(12) . ?
 W12 O61 2.373(10) . ?
 W12 O65 1.927(12) . ?
 W13 O44 1.806(11) . ?
 W13 O50 1.903(11) . ?
 W13 O51 1.712(12) . ?
 W13 O52 1.962(10) . ?
 W13 O61 2.460(10) . ?
 W13 O66 1.984(13) . ?
 W14 O45 1.777(12) . ?
 W14 O48 1.940(12) . ?
 W14 O49 1.720(12) . ?
 W14 O50 1.946(11) . ?
 W14 O60 2.433(10) . ?
 W14 O67 2.031(12) . ?
 W15 O46 1.744(13) . ?
 W15 O47 1.689(13) . ?
 W15 O48 1.949(11) . ?
 W15 O58 1.981(11) . ?
 W15 O60 2.441(11) . ?
 W15 O68 2.021(11) . ?
 W16 O42 1.758(12) . ?
 W16 O56 1.946(12) . ?
 W16 O57 1.707(11) . ?
 W16 O58 1.877(12) . ?
 W16 O62 2.449(10) . ?
 W16 O63 2.007(12) . ?
 W17 O41 1.844(11) . ?
 W17 O54 1.901(12) . ?
 W17 O55 1.733(10) . ?
 W17 O56 1.913(12) . ?
 W17 O62 2.401(10) . ?
 W17 O64 1.955(12) . ?
 W18 O60 2.527(11) . ?
 W18 O67 1.854(11) . ?
 W18 O68 1.848(11) . ?
 W18 O69 1.923(11) . ?
 W18 O70 1.972(12) . ?
 W18 O74 1.714(11) . ?
 W19 O62 2.514(10) . ?
 W19 O63 1.894(11) . ?
 W19 O64 1.893(12) . ?
 W19 O69 1.910(11) . ?
 W19 O71 1.905(12) . ?
 W19 O73 1.715(12) . ?
 W20 O61 2.511(11) . ?
 W20 O65 1.948(11) . ?
 W20 O66 1.903(13) . ?
 W20 O70 1.880(11) . ?
 W20 O71 1.903(11) . ?
 W20 O72 1.647(14) . ?
 Co1 O30 1.992(11) . ?
 Co1 O31 1.978(12) . ?
 Co1 O33W 2.105(10) . ?
 Co1 O35 2.072(11) . ?
 Co1 O36 2.256(11) . ?
 Co1 N1 2.129(14) . ?
 Co2 O28 2.019(11) . ?
 Co2 O29 2.010(11) . ?
 Co2 O33W 2.110(11) . ?
 Co2 O36 2.247(11) . ?
 Co2 O37 2.082(11) . ?
 Co2 N7 2.137(14) . ?
 Co3 O29W 2.092(11) . ?
 Co3 O30W 2.088(11) . ?
 Co3 O35 2.047(11) . ?
 Co3 O38 2.078(12) . ?
 Co3 N2 2.187(14) . ?
 Co3 N3 2.174(12) . ?
 Co4 O31W 2.108(10) . ?
 Co4 O32W 2.151(12) . ?
 Co4 O37 2.073(11) . ?
 Co4 O40 2.059(11) . ?
 Co4 N5 2.186(14) . ?
 Co4 N8 2.099(16) . ?
 Co5 O34W 2.033(11) . ?
 Co5 O40 2.085(11) . ?
 Co5 O42 2.074(11) . ?
 Co5 O46 2.038(13) . ?
 Co5 O59 2.225(10) . ?
 Co5 N6 2.087(15) . ?
 Co6 O34W 2.008(11) . ?
 Co6 O38 2.111(11) . ?
 Co6 O44 2.017(12) . ?
 Co6 O45 1.994(11) . ?
 Co6 O59 2.243(11) . ?
 Co6 N4 2.078(15) . ?
 P1 O25 1.565(11) . ?
 P1 O26 1.555(12) . ?
 P1 O27 1.554(12) . ?
 P1 O36 1.538(11) . ?
 P2 O59 1.569(11) . ?
 P2 O60 1.539(10) . ?
 P2 O61 1.550(11) . ?
 P2 O62 1.524(11) . ?
 N1 N2 1.292(19) . ?
 N1 C1 1.30(2) . ?
 N2 C4 1.35(2) . ?
 N3 N4 1.344(18) . ?
 N3 C5 1.31(2) . ?
 N4 C8 1.40(2) . ?
 N5 N6 1.359(18) . ?
 N5 C12 1.33(2) . ?
 N6 C9 1.35(2) . ?
 N7 N8 1.38(2) . ?
 N7 C16 1.30(2) . ?
 N8 C13 1.34(2) . ?
 C1 C2 1.44(3) . ?
 C2 C3 1.35(3) . ?
 C3 C4 1.38(3) . ?
 C5 C6 1.44(2) . ?
 C6 C7 1.35(2) . ?
 C7 C8 1.46(3) . ?
 C9 C10 1.37(2) . ?
 C10 C11 1.38(3) . ?
 C11 C12 1.37(2) . ?
 C13 C14 1.35(2) . ?
 C14 C15 1.32(2) . ?
 C15 C16 1.36(2) . ?
 Co7 O35W 2.061(11) . ?
 Co7 O36W 2.145(13) . ?
 Co7 O75 2.068(11) . ?
 Co7 N9 2.184(14) . ?
 Co7 N14 2.166(12) . ?
 Co7 N16 2.153(13) . ?
 Co8 O37W 2.058(12) . ?
 Co8 O39W 2.085(11) . ?
 Co8 O41W 2.106(10) . ?
 Co8 O75 2.078(10) . ?
 Co8 N10 2.151(14) . ?
 Co8 N11 2.213(13) . ?
 Co9 O38W 2.100(12) . ?
 Co9 O40W 2.024(11) . ?
 Co9 O75 2.044(10) . ?
 Co9 N12 2.197(12) . ?
 Co9 N13 2.119(14) . ?
 Co9 N15 2.121(13) . ?
 N9 N10 1.328(18) . ?
 N9 C20 1.380(19) . ?
 N10 C17 1.36(2) . ?
 N11 N12 1.337(18) . ?
 N11 C21 1.31(2) . ?
 N12 C24 1.23(2) . ?
 N13 N14 1.341(17) . ?
 N13 C28 1.341(19) . ?
 N14 C25 1.31(2) . ?
 N15 N16 1.343(19) . ?
 N15 C29 1.36(2) . ?
 N16 C32 1.36(2) . ?
 C17 C18 1.33(3) . ?
 C18 C19 1.34(3) . ?
 C19 C20 1.37(2) . ?
 C21 C22 1.40(2) . ?
 C22 C23 1.30(2) . ?
 C23 C24 1.39(3) . ?
 C25 C26 1.43(3) . ?
 C26 C27 1.28(3) . ?
 C27 C28 1.43(2) . ?
 C29 C30 1.39(3) . ?
 C30 C31 1.37(3) . ?
 C31 C32 1.37(2) . ?
 Na1 O42W 2.01(3) . ?
 Na1 O43W 1.94(4) . ?
 Na1 O44W 2.27(5) . ?
 Na1 O45W 2.00(3) . ?
 Na1 O46W 1.94(4) . ?
 Na1 O49W 1.90(3) . ?
 O4W O4WA 0.73(4) . ?
 O3W O3WA 1.05(5) . ?
 O2W O2WA 0.82(5) . ?
 O5W O5WA 0.90(5) . ?
 O1W O1WA 1.00(5) . ?
 O6W O6WA 0.89(5) . ?

loop_
  _geom_angle_atom_site_label_1
  _geom_angle_atom_site_label_2
  _geom_angle_atom_site_label_3
  _geom_angle
  _geom_angle_site_symmetry_1
  _geom_angle_site_symmetry_3
  _geom_angle_publ_flag
 O3 W1 O4 102.7(6) . . ?
 O3 W1 O5 102.7(5) . . ?
 O3 W1 O7 103.3(5) . . ?
 O3 W1 O12 101.4(6) . . ?
 O3 W1 O26 172.1(5) . . ?
 O4 W1 O5 82.2(5) . . ?
 O4 W1 O26 82.7(5) . . ?
 O5 W1 O26 83.6(4) . . ?
 O7 W1 O4 153.3(5) . . ?
 O7 W1 O5 86.5(5) . . ?
 O7 W1 O12 91.9(5) . . ?
 O7 W1 O26 72.0(4) . . ?
 O12 W1 O4 88.7(5) . . ?
 O12 W1 O5 155.5(5) . . ?
 O12 W1 O26 72.8(4) . . ?
 O1 W2 O4 103.7(5) . . ?
 O1 W2 O6 101.5(5) . . ?
 O1 W2 O10 100.9(5) . . ?
 O1 W2 O11 103.0(5) . . ?
 O1 W2 O27 172.1(5) . . ?
 O4 W2 O6 86.2(5) . . ?
 O4 W2 O10 155.2(5) . . ?
 O4 W2 O27 82.7(4) . . ?
 O6 W2 O10 86.2(5) . . ?
 O6 W2 O27 83.4(4) . . ?
 O10 W2 O27 73.0(4) . . ?
 O11 W2 O4 89.7(5) . . ?
 O11 W2 O6 155.4(5) . . ?
 O11 W2 O10 87.5(4) . . ?
 O11 W2 O27 72.0(4) . . ?
 O2 W3 O5 102.5(5) . . ?
 O2 W3 O6 102.3(5) . . ?
 O2 W3 O8 102.2(6) . . ?
 O2 W3 O9 101.8(5) . . ?
 O2 W3 O25 171.3(5) . . ?
 O5 W3 O6 86.9(5) . . ?
 O5 W3 O9 155.6(5) . . ?
 O5 W3 O25 84.5(4) . . ?
 O6 W3 O25 83.1(4) . . ?
 O8 W3 O5 90.1(5) . . ?
 O8 W3 O6 155.4(5) . . ?
 O8 W3 O9 86.5(5) . . ?
 O8 W3 O25 72.3(4) . . ?
 O9 W3 O6 86.3(5) . . ?
 O9 W3 O25 71.5(4) . . ?
 O7 W4 O26 70.7(4) . . ?
 O13 W4 O7 83.0(5) . . ?
 O13 W4 O26 71.5(5) . . ?
 O14 W4 O7 98.4(5) . . ?
 O14 W4 O13 100.2(5) . . ?
 O14 W4 O15 102.0(5) . . ?
 O14 W4 O26 166.7(4) . . ?
 O14 W4 O30 105.9(5) . . ?
 O15 W4 O7 82.5(4) . . ?
 O15 W4 O13 155.0(5) . . ?
 O15 W4 O26 84.5(4) . . ?
 O30 W4 O7 155.6(5) . . ?
 O30 W4 O13 93.9(5) . . ?
 O30 W4 O15 91.1(5) . . ?
 O30 W4 O26 85.3(4) . . ?
 O8 W5 O25 71.1(4) . . ?
 O15 W5 O8 86.2(5) . . ?
 O15 W5 O17 154.5(4) . . ?
 O15 W5 O25 83.6(4) . . ?
 O16 W5 O8 98.6(5) . . ?
 O16 W5 O15 102.2(5) . . ?
 O16 W5 O17 101.8(5) . . ?
 O16 W5 O25 168.0(5) . . ?
 O16 W5 O31 103.0(5) . . ?
 O17 W5 O8 82.0(4) . . ?
 O17 W5 O25 71.2(4) . . ?
 O31 W5 O8 158.2(5) . . ?
 O31 W5 O15 91.9(5) . . ?
 O31 W5 O17 90.8(5) . . ?
 O31 W5 O25 87.1(4) . . ?
 O9 W6 O18 85.0(5) . . ?
 O9 W6 O25 73.3(4) . . ?
 O17 W6 O9 84.8(5) . . ?
 O17 W6 O18 158.3(4) . . ?
 O17 W6 O25 74.0(4) . . ?
 O18 W6 O25 84.8(4) . . ?
 O19 W6 O9 100.9(5) . . ?
 O19 W6 O17 99.7(5) . . ?
 O19 W6 O18 101.0(5) . . ?
 O19 W6 O25 171.6(4) . . ?
 O19 W6 O32 103.0(5) . . ?
 O32 W6 O9 155.9(4) . . ?
 O32 W6 O17 94.3(5) . . ?
 O32 W6 O18 87.3(5) . . ?
 O32 W6 O25 83.2(4) . . ?
 O10 W7 O21 85.2(4) . . ?
 O10 W7 O27 74.1(4) . . ?
 O18 W7 O10 87.3(5) . . ?
 O18 W7 O21 157.3(5) . . ?
 O18 W7 O27 85.7(4) . . ?
 O20 W7 O10 100.0(5) . . ?
 O20 W7 O18 100.7(5) . . ?
 O20 W7 O21 101.7(5) . . ?
 O20 W7 O27 171.3(4) . . ?
 O20 W7 O33 103.6(5) . . ?
 O21 W7 O27 71.7(4) . . ?
 O33 W7 O10 156.4(5) . . ?
 O33 W7 O18 89.1(5) . . ?
 O33 W7 O21 89.3(4) . . ?
 O33 W7 O27 82.4(4) . . ?
 O11 W8 O27 71.8(4) . . ?
 O21 W8 O11 83.6(4) . . ?
 O21 W8 O27 72.7(4) . . ?
 O22 W8 O11 97.3(5) . . ?
 O22 W8 O21 101.6(5) . . ?
 O22 W8 O23 100.8(5) . . ?
 O22 W8 O27 167.9(4) . . ?
 O22 W8 O28 102.9(5) . . ?
 O23 W8 O11 86.1(4) . . ?
 O23 W8 O21 156.3(4) . . ?
 O23 W8 O27 83.9(4) . . ?
 O28 W8 O11 159.7(4) . . ?
 O28 W8 O21 91.2(5) . . ?
 O28 W8 O23 91.0(5) . . ?
 O28 W8 O27 88.0(4) . . ?
 O12 W9 O26 72.4(4) . . ?
 O13 W9 O12 82.3(5) . . ?
 O13 W9 O26 72.2(4) . . ?
 O23 W9 O12 83.4(5) . . ?
 O23 W9 O13 155.3(4) . . ?
 O23 W9 O26 84.3(4) . . ?
 O24 W9 O12 96.7(5) . . ?
 O24 W9 O13 99.3(5) . . ?
 O24 W9 O23 102.3(5) . . ?
 O24 W9 O26 166.7(5) . . ?
 O24 W9 O29 102.2(6) . . ?
 O29 W9 O12 161.1(5) . . ?
 O29 W9 O13 93.8(5) . . ?
 O29 W9 O23 93.2(5) . . ?
 O29 W9 O26 88.8(4) . . ?
 O32 W10 O36 80.3(4) . . ?
 O33 W10 O32 80.3(4) . . ?
 O33 W10 O36 81.4(4) . . ?
 O34 W10 O32 98.0(5) . . ?
 O34 W10 O33 98.7(5) . . ?
 O34 W10 O35 101.4(5) . . ?
 O34 W10 O36 178.2(5) . . ?
 O34 W10 O37 102.6(5) . . ?
 O35 W10 O32 86.3(5) . . ?
 O35 W10 O33 157.2(5) . . ?
 O35 W10 O36 78.2(4) . . ?
 O37 W10 O32 158.0(5) . . ?
 O37 W10 O33 89.2(5) . . ?
 O37 W10 O35 96.8(5) . . ?
 O37 W10 O36 79.1(4) . . ?
 O38 W11 O40 97.0(5) . . ?
 O38 W11 O41 158.8(5) . . ?
 O38 W11 O43 89.9(4) . . ?
 O38 W11 O59 79.8(4) . . ?
 O39 W11 O38 102.2(5) . . ?
 O39 W11 O40 102.8(5) . . ?
 O39 W11 O41 97.1(5) . . ?
 O39 W11 O43 97.1(5) . . ?
 O39 W11 O59 177.7(4) . . ?
 O40 W11 O41 87.3(5) . . ?
 O40 W11 O43 157.0(5) . . ?
 O40 W11 O59 78.2(4) . . ?
 O41 W11 O59 80.8(4) . . ?
 O43 W11 O41 78.9(4) . . ?
 O43 W11 O59 81.5(4) . . ?
 O43 W12 O52 91.1(4) . . ?
 O43 W12 O54 87.6(5) . . ?
 O43 W12 O61 82.1(4) . . ?
 O43 W12 O65 156.6(5) . . ?
 O52 W12 O54 156.4(5) . . ?
 O52 W12 O61 73.4(4) . . ?
 O52 W12 O65 86.0(5) . . ?
 O53 W12 O43 102.7(5) . . ?
 O53 W12 O52 99.0(5) . . ?
 O53 W12 O54 104.3(5) . . ?
 O53 W12 O61 171.2(4) . . ?
 O53 W12 O65 100.8(5) . . ?
 O54 W12 O61 83.2(4) . . ?
 O65 W12 O54 85.9(5) . . ?
 O65 W12 O61 74.8(4) . . ?
 O44 W13 O50 92.2(5) . . ?
 O44 W13 O52 90.9(4) . . ?
 O44 W13 O61 86.9(4) . . ?
 O44 W13 O66 159.1(5) . . ?
 O50 W13 O52 154.6(5) . . ?
 O50 W13 O61 84.5(4) . . ?
 O50 W13 O66 85.3(5) . . ?
 O51 W13 O44 102.2(5) . . ?
 O51 W13 O50 103.1(6) . . ?
 O51 W13 O52 100.9(5) . . ?
 O51 W13 O61 167.8(5) . . ?
 O51 W13 O66 98.6(5) . . ?
 O52 W13 O61 70.5(4) . . ?
 O52 W13 O66 82.9(5) . . ?
 O66 W13 O61 72.2(4) . . ?
 O45 W14 O48 94.9(5) . . ?
 O45 W14 O50 90.4(5) . . ?
 O45 W14 O60 86.9(4) . . ?
 O45 W14 O67 158.0(5) . . ?
 O48 W14 O50 154.9(5) . . ?
 O48 W14 O60 72.1(4) . . ?
 O48 W14 O67 83.8(5) . . ?
 O49 W14 O45 105.8(6) . . ?
 O49 W14 O48 100.1(6) . . ?
 O49 W14 O50 102.0(6) . . ?
 O49 W14 O60 165.9(5) . . ?
 O49 W14 O67 96.0(5) . . ?
 O50 W14 O60 83.7(4) . . ?
 O50 W14 O67 82.2(5) . . ?
 O67 W14 O60 71.8(4) . . ?
 O46 W15 O48 93.8(5) . . ?
 O46 W15 O58 91.4(5) . . ?
 O46 W15 O60 85.8(5) . . ?
 O46 W15 O68 157.0(5) . . ?
 O47 W15 O46 102.3(6) . . ?
 O47 W15 O48 101.5(6) . . ?
 O47 W15 O58 101.2(6) . . ?
 O47 W15 O60 170.0(5) . . ?
 O47 W15 O68 100.6(5) . . ?
 O48 W15 O58 155.0(5) . . ?
 O48 W15 O60 71.8(4) . . ?
 O48 W15 O68 83.0(5) . . ?
 O58 W15 O60 84.2(4) . . ?
 O58 W15 O68 82.8(5) . . ?
 O68 W15 O60 71.6(4) . . ?
 O42 W16 O56 89.4(5) . . ?
 O42 W16 O58 93.8(5) . . ?
 O42 W16 O62 86.8(4) . . ?
 O42 W16 O63 159.8(5) . . ?
 O56 W16 O62 71.5(4) . . ?
 O56 W16 O63 84.4(5) . . ?
 O57 W16 O42 104.7(5) . . ?
 O57 W16 O56 99.6(5) . . ?
 O57 W16 O58 102.8(5) . . ?
 O57 W16 O62 165.6(5) . . ?
 O57 W16 O63 95.4(5) . . ?
 O58 W16 O56 155.7(5) . . ?
 O58 W16 O62 84.7(4) . . ?
 O58 W16 O63 84.4(5) . . ?
 O63 W16 O62 72.9(4) . . ?
 O41 W17 O54 87.9(5) . . ?
 O41 W17 O56 93.1(5) . . ?
 O41 W17 O62 82.7(4) . . ?
 O41 W17 O64 155.9(4) . . ?
 O54 W17 O56 156.4(5) . . ?
 O54 W17 O62 83.6(4) . . ?
 O54 W17 O64 84.5(5) . . ?
 O55 W17 O41 101.9(5) . . ?
 O55 W17 O54 101.9(5) . . ?
 O55 W17 O56 101.0(5) . . ?
 O55 W17 O62 172.9(4) . . ?
 O55 W17 O64 102.0(5) . . ?
 O56 W17 O62 73.1(4) . . ?
 O56 W17 O64 85.2(5) . . ?
 O64 W17 O62 73.8(4) . . ?
 O67 W18 O60 72.2(4) . . ?
 O67 W18 O69 155.2(5) . . ?
 O67 W18 O70 87.1(5) . . ?
 O68 W18 O60 72.0(4) . . ?
 O68 W18 O67 90.5(6) . . ?
 O68 W18 O69 88.9(5) . . ?
 O68 W18 O70 156.0(5) . . ?
 O69 W18 O60 84.1(4) . . ?
 O69 W18 O70 83.5(4) . . ?
 O70 W18 O60 84.5(4) . . ?
 O74 W18 O60 172.6(5) . . ?
 O74 W18 O67 103.1(5) . . ?
 O74 W18 O68 102.7(5) . . ?
 O74 W18 O69 101.3(5) . . ?
 O74 W18 O70 101.1(5) . . ?
 O63 W19 O62 73.1(4) . . ?
 O63 W19 O69 88.2(5) . . ?
 O63 W19 O71 155.9(5) . . ?
 O64 W19 O62 72.1(4) . . ?
 O64 W19 O63 88.4(5) . . ?
 O64 W19 O69 155.4(5) . . ?
 O64 W19 O71 88.6(5) . . ?
 O69 W19 O62 83.6(4) . . ?
 O71 W19 O62 83.2(4) . . ?
 O71 W19 O69 84.7(5) . . ?
 O73 W19 O62 172.0(4) . . ?
 O73 W19 O63 103.1(5) . . ?
 O73 W19 O64 101.0(5) . . ?
 O73 W19 O69 103.5(5) . . ?
 O73 W19 O71 101.0(5) . . ?
 O65 W20 O61 71.2(4) . . ?
 O66 W20 O61 72.2(4) . . ?
 O66 W20 O65 87.0(5) . . ?
 O66 W20 O71 154.1(5) . . ?
 O70 W20 O61 85.1(4) . . ?
 O70 W20 O65 156.0(5) . . ?
 O70 W20 O66 89.2(5) . . ?
 O70 W20 O71 85.9(5) . . ?
 O71 W20 O61 82.1(4) . . ?
 O71 W20 O65 87.3(5) . . ?
 O72 W20 O61 171.8(5) . . ?
 O72 W20 O65 102.9(6) . . ?
 O72 W20 O66 102.2(6) . . ?
 O72 W20 O70 101.0(6) . . ?
 O72 W20 O71 103.7(6) . . ?
 O30 Co1 O33W 88.9(4) . . ?
 O30 Co1 O35 168.7(4) . . ?
 O30 Co1 O36 91.0(4) . . ?
 O30 Co1 N1 98.3(5) . . ?
 O31 Co1 O30 87.5(5) . . ?
 O31 Co1 O33W 175.6(4) . . ?
 O31 Co1 O35 93.5(5) . . ?
 O31 Co1 O36 95.5(4) . . ?
 O31 Co1 N1 97.3(5) . . ?
 O33W Co1 O36 82.0(4) . . ?
 O33W Co1 N1 85.7(5) . . ?
 O35 Co1 O33W 89.5(4) . . ?
 O35 Co1 O36 77.7(4) . . ?
 O35 Co1 N1 92.8(5) . . ?
 N1 Co1 O36 164.4(5) . . ?
 O28 Co2 O33W 173.4(4) . . ?
 O28 Co2 O36 91.8(4) . . ?
 O28 Co2 O37 89.9(4) . . ?
 O28 Co2 N7 103.1(5) . . ?
 O29 Co2 O28 88.7(5) . . ?
 O29 Co2 O33W 89.2(5) . . ?
 O29 Co2 O36 93.2(4) . . ?
 O29 Co2 O37 171.2(5) . . ?
 O29 Co2 N7 96.5(5) . . ?
 O33W Co2 O36 82.1(4) . . ?
 O33W Co2 N7 83.4(5) . . ?
 O37 Co2 O33W 91.2(4) . . ?
 O37 Co2 O36 78.2(4) . . ?
 O37 Co2 N7 92.3(5) . . ?
 N7 Co2 O36 162.4(4) . . ?
 O29W Co3 N2 88.0(5) . . ?
 O29W Co3 N3 87.4(5) . . ?
 O30W Co3 O29W 89.1(5) . . ?
 O30W Co3 N2 83.8(5) . . ?
 O30W Co3 N3 86.8(4) . . ?
 O35 Co3 O29W 177.6(5) . . ?
 O35 Co3 O30W 89.2(4) . . ?
 O35 Co3 O38 91.9(4) . . ?
 O35 Co3 N2 90.1(5) . . ?
 O35 Co3 N3 94.2(5) . . ?
 O38 Co3 O29W 89.9(5) . . ?
 O38 Co3 O30W 176.6(4) . . ?
 O38 Co3 N2 99.5(5) . . ?
 O38 Co3 N3 89.9(4) . . ?
 N3 Co3 N2 169.6(5) . . ?
 O31W Co4 O32W 88.6(4) . . ?
 O31W Co4 N5 85.5(5) . . ?
 O32W Co4 N5 83.2(5) . . ?
 O37 Co4 O31W 89.9(4) . . ?
 O37 Co4 O32W 176.5(4) . . ?
 O37 Co4 N5 99.9(5) . . ?
 O37 Co4 N8 90.7(5) . . ?
 O40 Co4 O31W 176.6(4) . . ?
 O40 Co4 O32W 89.1(4) . . ?
 O40 Co4 O37 92.5(4) . . ?
 O40 Co4 N5 91.6(5) . . ?
 O40 Co4 N8 93.6(5) . . ?
 N8 Co4 O31W 88.8(5) . . ?
 N8 Co4 O32W 86.1(5) . . ?
 N8 Co4 N5 167.9(6) . . ?
 O34W Co5 O40 91.6(4) . . ?
 O34W Co5 O42 172.5(4) . . ?
 O34W Co5 O46 90.5(4) . . ?
 O34W Co5 O59 80.9(4) . . ?
 O34W Co5 N6 90.5(5) . . ?
 O40 Co5 O59 77.2(4) . . ?
 O40 Co5 N6 93.6(5) . . ?
 O42 Co5 O40 91.7(4) . . ?
 O42 Co5 O59 93.3(4) . . ?
 O42 Co5 N6 96.0(5) . . ?
 O46 Co5 O40 168.7(5) . . ?
 O46 Co5 O42 85.0(4) . . ?
 O46 Co5 O59 92.2(4) . . ?
 O46 Co5 N6 97.5(5) . . ?
 N6 Co5 O59 167.1(5) . . ?
 O34W Co6 O38 92.1(4) . . ?
 O34W Co6 O44 172.1(5) . . ?
 O34W Co6 O59 81.0(4) . . ?
 O34W Co6 N4 86.5(5) . . ?
 O38 Co6 O59 77.5(4) . . ?
 O44 Co6 O38 89.7(4) . . ?
 O44 Co6 O59 91.9(4) . . ?
 O44 Co6 N4 101.1(5) . . ?
 O45 Co6 O34W 92.2(5) . . ?
 O45 Co6 O38 169.0(5) . . ?
 O45 Co6 O44 84.7(5) . . ?
 O45 Co6 O59 93.2(4) . . ?
 O45 Co6 N4 99.5(5) . . ?
 N4 Co6 O38 90.9(5) . . ?
 N4 Co6 O59 162.5(5) . . ?
 O26 P1 O25 109.3(7) . . ?
 O27 P1 O25 109.1(6) . . ?
 O27 P1 O26 108.1(6) . . ?
 O36 P1 O25 110.0(6) . . ?
 O36 P1 O26 111.0(6) . . ?
 O36 P1 O27 109.2(6) . . ?
 O60 P2 O59 109.1(6) . . ?
 O60 P2 O61 110.4(6) . . ?
 O61 P2 O59 109.5(6) . . ?
 O62 P2 O59 109.5(6) . . ?
 O62 P2 O60 109.5(6) . . ?
 O62 P2 O61 108.7(6) . . ?
 W2 O4 W1 155.1(6) . . ?
 W3 O5 W1 152.9(6) . . ?
 W2 O6 W3 149.3(7) . . ?
 W1 O7 W4 127.2(6) . . ?
 W3 O8 W5 127.3(6) . . ?
 W3 O9 W6 125.2(6) . . ?
 W7 O10 W2 124.8(6) . . ?
 W2 O11 W8 126.3(5) . . ?
 W1 O12 W9 124.7(6) . . ?
 W9 O13 W4 125.0(6) . . ?
 W5 O15 W4 145.1(6) . . ?
 W6 O17 W5 124.7(5) . . ?
 W7 O18 W6 145.9(6) . . ?
 W8 O21 W7 125.1(5) . . ?
 W9 O23 W8 144.6(6) . . ?
 W5 O25 W3 89.3(4) . . ?
 W6 O25 W3 89.9(4) . . ?
 W6 O25 W5 90.0(3) . . ?
 P1 O25 W3 125.6(6) . . ?
 P1 O25 W5 125.0(6) . . ?
 P1 O25 W6 125.8(6) . . ?
 W4 O26 W1 89.6(4) . . ?
 W9 O26 W1 89.8(4) . . ?
 W9 O26 W4 90.7(4) . . ?
 P1 O26 W1 126.1(6) . . ?
 P1 O26 W4 124.8(6) . . ?
 P1 O26 W9 124.8(7) . . ?
 W7 O27 W2 88.1(4) . . ?
 W8 O27 W2 89.9(3) . . ?
 W8 O27 W7 90.5(4) . . ?
 P1 O27 W2 126.6(6) . . ?
 P1 O27 W7 124.3(6) . . ?
 P1 O27 W8 126.0(6) . . ?
 W8 O28 Co2 142.8(6) . . ?
 W9 O29 Co2 140.1(6) . . ?
 W4 O30 Co1 144.9(6) . . ?
 W5 O31 Co1 141.9(6) . . ?
 W6 O32 W10 155.5(6) . . ?
 W7 O33 W10 154.5(6) . . ?
 Co1 O33W Co2 102.3(5) . . ?
 Co6 O34W Co5 105.8(5) . . ?
 W10 O35 Co1 114.0(5) . . ?
 W10 O35 Co3 134.5(6) . . ?
 Co3 O35 Co1 111.5(5) . . ?
 Co1 O36 W10 90.0(4) . . ?
 Co2 O36 W10 89.3(4) . . ?
 Co2 O36 Co1 93.6(4) . . ?
 P1 O36 W10 128.6(6) . . ?
 P1 O36 Co1 121.4(6) . . ?
 P1 O36 Co2 123.7(6) . . ?
 W10 O37 Co2 113.1(6) . . ?
 W10 O37 Co4 135.8(6) . . ?
 Co4 O37 Co2 110.9(5) . . ?
 W11 O38 Co3 135.9(6) . . ?
 W11 O38 Co6 112.6(6) . . ?
 Co3 O38 Co6 111.2(5) . . ?
 W11 O40 Co4 135.1(6) . . ?
 W11 O40 Co5 113.7(5) . . ?
 Co4 O40 Co5 111.1(6) . . ?
 W17 O41 W11 155.9(6) . . ?
 W16 O42 Co5 142.0(6) . . ?
 W12 O43 W11 156.6(6) . . ?
 W13 O44 Co6 143.4(6) . . ?
 W14 O45 Co6 145.7(7) . . ?
 W15 O46 Co5 145.7(7) . . ?
 W14 O48 W15 125.5(6) . . ?
 W13 O50 W14 143.7(6) . . ?
 W12 O52 W13 125.4(6) . . ?
 W17 O54 W12 146.4(7) . . ?
 W17 O56 W16 125.4(6) . . ?
 W16 O58 W15 142.8(7) . . ?
 Co5 O59 W11 90.7(3) . . ?
 Co5 O59 Co6 92.3(4) . . ?
 Co6 O59 W11 89.9(4) . . ?
 P2 O59 W11 127.4(6) . . ?
 P2 O59 Co5 122.9(6) . . ?
 P2 O59 Co6 123.4(6) . . ?
 W14 O60 W15 90.3(3) . . ?
 W14 O60 W18 88.9(3) . . ?
 W15 O60 W18 88.7(3) . . ?
 P2 O60 W14 126.3(6) . . ?
 P2 O60 W15 126.1(6) . . ?
 P2 O60 W18 124.8(6) . . ?
 W12 O61 W13 90.7(3) . . ?
 W12 O61 W20 89.2(3) . . ?
 W13 O61 W20 88.8(3) . . ?
 P2 O61 W12 126.9(6) . . ?
 P2 O61 W13 123.9(6) . . ?
 P2 O61 W20 125.8(6) . . ?
 W16 O62 W19 88.5(3) . . ?
 W17 O62 W16 90.0(3) . . ?
 W17 O62 W19 88.3(3) . . ?
 P2 O62 W16 126.4(6) . . ?
 P2 O62 W17 125.9(6) . . ?
 P2 O62 W19 125.8(5) . . ?
 W19 O63 W16 125.3(6) . . ?
 W19 O64 W17 125.7(5) . . ?
 W12 O65 W20 124.7(6) . . ?
 W20 O66 W13 126.9(6) . . ?
 W18 O67 W14 126.8(6) . . ?
 W18 O68 W15 127.6(6) . . ?
 W19 O69 W18 153.1(6) . . ?
 W20 O70 W18 151.1(6) . . ?
 W20 O71 W19 152.9(7) . . ?
 N2 N1 Co1 118.3(11) . . ?
 N2 N1 C1 122.2(16) . . ?
 C1 N1 Co1 118.5(13) . . ?
 N1 N2 Co3 116.2(11) . . ?
 N1 N2 C4 119.4(15) . . ?
 C4 N2 Co3 122.3(13) . . ?
 N4 N3 Co3 115.3(10) . . ?
 C5 N3 Co3 120.3(11) . . ?
 C5 N3 N4 124.3(14) . . ?
 N3 N4 Co6 122.8(10) . . ?
 N3 N4 C8 116.8(14) . . ?
 C8 N4 Co6 117.6(12) . . ?
 N6 N5 Co4 113.5(11) . . ?
 C12 N5 Co4 124.8(11) . . ?
 C12 N5 N6 119.5(15) . . ?
 N5 N6 Co5 119.8(11) . . ?
 C9 N6 Co5 122.9(11) . . ?
 C9 N6 N5 117.1(14) . . ?
 N8 N7 Co2 116.8(11) . . ?
 C16 N7 Co2 120.2(11) . . ?
 C16 N7 N8 120.4(15) . . ?
 N7 N8 Co4 119.5(12) . . ?
 C13 N8 Co4 125.4(13) . . ?
 C13 N8 N7 115.1(15) . . ?
 N1 C1 C2 121.8(18) . . ?
 C3 C2 C1 115.1(19) . . ?
 C2 C3 C4 119(2) . . ?
 N2 C4 C3 121.3(19) . . ?
 N3 C5 C6 120.4(17) . . ?
 C7 C6 C5 119.6(17) . . ?
 C6 C7 C8 117.0(18) . . ?
 N4 C8 C7 121.7(17) . . ?
 N6 C9 C10 123.9(16) . . ?
 C9 C10 C11 118.2(17) . . ?
 C12 C11 C10 116.1(18) . . ?
 N5 C12 C11 124.6(19) . . ?
 N8 C13 C14 124.7(18) . . ?
 C15 C14 C13 118.0(18) . . ?
 C14 C15 C16 118.9(16) . . ?
 N7 C16 C15 122.7(15) . . ?
 O35W Co7 O36W 91.1(5) . . ?
 O35W Co7 O75 175.0(4) . . ?
 O35W Co7 N9 93.0(5) . . ?
 O35W Co7 N14 90.2(5) . . ?
 O35W Co7 N16 91.1(5) . . ?
 O36W Co7 N9 85.0(5) . . ?
 O36W Co7 N14 177.4(5) . . ?
 O36W Co7 N16 87.2(5) . . ?
 O75 Co7 O36W 92.7(5) . . ?
 O75 Co7 N9 90.5(4) . . ?
 O75 Co7 N14 86.1(4) . . ?
 O75 Co7 N16 85.9(5) . . ?
 N14 Co7 N9 92.7(5) . . ?
 N16 Co7 N9 171.3(5) . . ?
 N16 Co7 N14 95.0(5) . . ?
 O37W Co8 O39W 86.7(4) . . ?
 O37W Co8 O41W 171.9(4) . . ?
 O37W Co8 O75 88.0(4) . . ?
 O37W Co8 N10 91.6(5) . . ?
 O37W Co8 N11 98.8(5) . . ?
 O39W Co8 O41W 86.0(4) . . ?
 O39W Co8 N10 92.8(5) . . ?
 O39W Co8 N11 90.5(5) . . ?
 O41W Co8 N10 85.1(4) . . ?
 O41W Co8 N11 84.9(4) . . ?
 O75 Co8 O39W 174.2(4) . . ?
 O75 Co8 O41W 99.4(4) . . ?
 O75 Co8 N10 89.7(5) . . ?
 O75 Co8 N11 88.0(5) . . ?
 N10 Co8 N11 169.2(5) . . ?
 O38W Co9 N12 84.1(5) . . ?
 O38W Co9 N13 178.2(5) . . ?
 O38W Co9 N15 86.8(5) . . ?
 O40W Co9 O38W 88.8(5) . . ?
 O40W Co9 O75 178.6(5) . . ?
 O40W Co9 N12 88.8(5) . . ?
 O40W Co9 N13 92.7(5) . . ?
 O40W Co9 N15 90.6(5) . . ?
 O75 Co9 O38W 91.4(5) . . ?
 O75 Co9 N12 92.6(5) . . ?
 O75 Co9 N13 87.1(5) . . ?
 O75 Co9 N15 88.0(5) . . ?
 N13 Co9 N12 95.0(5) . . ?
 N13 Co9 N15 94.1(5) . . ?
 N15 Co9 N12 170.9(5) . . ?
 Co7 O75 Co8 115.3(5) . . ?
 Co9 O75 Co7 105.7(5) . . ?
 Co9 O75 Co8 114.6(5) . . ?
 N10 N9 Co7 118.5(10) . . ?
 N10 N9 C20 119.0(14) . . ?
 C20 N9 Co7 121.1(11) . . ?
 N9 N10 Co8 118.8(11) . . ?
 N9 N10 C17 117.2(14) . . ?
 C17 N10 Co8 123.5(11) . . ?
 N12 N11 Co8 117.4(9) . . ?
 C21 N11 Co8 121.9(12) . . ?
 C21 N11 N12 119.6(14) . . ?
 N11 N12 Co9 114.6(9) . . ?
 C24 N12 Co9 123.7(12) . . ?
 C24 N12 N11 120.4(14) . . ?
 N14 N13 Co9 117.9(9) . . ?
 C28 N13 Co9 121.8(11) . . ?
 C28 N13 N14 119.8(13) . . ?
 N13 N14 Co7 115.9(9) . . ?
 C25 N14 Co7 122.8(11) . . ?
 C25 N14 N13 121.0(13) . . ?
 N16 N15 Co9 117.0(9) . . ?
 N16 N15 C29 118.8(13) . . ?
 C29 N15 Co9 123.1(12) . . ?
 N15 N16 Co7 116.8(9) . . ?
 N15 N16 C32 120.1(14) . . ?
 C32 N16 Co7 122.5(12) . . ?
 C18 C17 N10 124.3(16) . . ?
 C17 C18 C19 120.2(18) . . ?
 C18 C19 C20 116.2(16) . . ?
 C19 C20 N9 123.0(16) . . ?
 N11 C21 C22 117.5(16) . . ?
 C23 C22 C21 123.1(16) . . ?
 C22 C23 C24 112.7(14) . . ?
 N12 C24 C23 125.8(16) . . ?
 N14 C25 C26 120.8(15) . . ?
 C27 C26 C25 118.9(16) . . ?
 C26 C27 C28 119.7(17) . . ?
 N13 C28 C27 119.7(16) . . ?
 N15 C29 C30 121.6(17) . . ?
 C31 C30 C29 118.7(17) . . ?
 C30 C31 C32 118.2(17) . . ?
 N16 C32 C31 121.8(18) . . ?
 O42W Na1 O44W 170.6(15) . . ?
 O43W Na1 O42W 91.3(15) . . ?
 O43W Na1 O44W 84.6(18) . . ?
 O43W Na1 O45W 164.3(15) . . ?
 O45W Na1 O42W 104.4(14) . . ?
 O45W Na1 O44W 80.0(13) . . ?
 O46W Na1 O42W 83.2(16) . . ?
 O46W Na1 O43W 81.5(17) . . ?
 O46W Na1 O44W 105(2) . . ?
 O46W Na1 O45W 99.3(17) . . ?
 O49W Na1 O42W 89.3(10) . . ?
 O49W Na1 O43W 91.4(11) . . ?
 O49W Na1 O44W 82.3(13) . . ?
 O49W Na1 O45W 89.7(10) . . ?
 O49W Na1 O46W 169.5(17) . . ?

_iucr_refine_instructions_details
;
TITL Integration of 151009c
CELL 0.71 12.1218 44.0691 13.7866 90 92.7428 90
ZERR 2 0.0005 0.0021 0.0007 0 0.0027 0
LATT -1
SYMM -X,0.5+Y,-Z
SFAC C H Co N Na O P W
UNIT 64 64 18 32 2 248 4 40
DFIX 2.75 0.01 O45W O44W
DFIX 2.75 0.01 O49W O44W
DFIX 2.75 0.01 O42W O49W
DFIX 2.75 0.01 O43W O49W
DFIX 2.75 0.01 O49W O45W
SIMU 0.004 0.08 1.7 Na1 O42W O45W O46W
SIMU 0.004 0.08 1.7 O1W O1WA
SIMU 0.004 0.08 1.7 O2W O2WA
SIMU 0.004 0.08 1.7 O3W O3WA
ISOR 0.006 0.2 O19 O18 C12 C14
 
L.S. 10 0 0
PLAN  200
SIZE 0.1 0.1 0.08
TEMP -100
fmap 2 53
acta
OMIT -3 52
OMIT -3 13 3
OMIT -3 -13 3
OMIT -2 8 3
OMIT -2 -8 3
OMIT 9 0 10
OMIT -2 -14 3
OMIT 2 0 3
OMIT 5 2 15
OMIT -1 7 4
OMIT 7 22 13
OMIT -2 0 9
OMIT 0 1 2
OMIT -1 0 8
OMIT 1 1 5
OMIT -2 10 13
OMIT 0 16 0
OMIT 6 26 13
OMIT 11 0 1
REM <olex2.extras>
REM <HklSrc "%.\\P.hkl">
REM </olex2.extras>
 
WGHT    0.050700
FVAR       0.18867
W1    8    0.206316    0.817299   -0.063263    11.00000    0.02773    0.02617 =
         0.02758    0.00408    0.00051    0.00119
W2    8    0.299890    0.842169    0.186275    11.00000    0.03196    0.02109 =
         0.02870    0.00115    0.00459    0.00136
W3    8    0.502756    0.836364   -0.004874    11.00000    0.02824    0.02300 =
         0.02568    0.00165    0.00331   -0.00122
W4    8    0.288333    0.746471   -0.143826    11.00000    0.03155    0.02937 =
         0.02758   -0.00008   -0.00059   -0.00016
W5    8    0.578687    0.765612   -0.090847    11.00000    0.02811    0.02536 =
         0.02448   -0.00010    0.00226   -0.00105
W6    8    0.660849    0.787931    0.139668    11.00000    0.02506    0.02279 =
         0.02493    0.00042    0.00023   -0.00243
W7    8    0.460799    0.795213    0.330649    11.00000    0.02925    0.02116 =
         0.02370   -0.00150    0.00204   -0.00069
W8    8    0.188200    0.777006    0.279252    11.00000    0.02698    0.02239 =
         0.02930    0.00084    0.00436    0.00111
W9    8    0.099642    0.751519    0.034496    11.00000    0.02860    0.03070 =
         0.03275    0.00393   -0.00030   -0.00076
W10   8    0.537318    0.717407    0.245665    11.00000    0.02481    0.01999 =
         0.02331   -0.00017    0.00044   -0.00042
W11   8    0.515282    0.614867    0.266699    11.00000    0.02430    0.02151 =
         0.02635   -0.00035    0.00090   -0.00019
W12   8    0.595300    0.537422    0.180061    11.00000    0.03053    0.02218 =
         0.02960   -0.00282    0.00322   -0.00047
W13   8    0.867421    0.555389    0.234037    11.00000    0.02980    0.02407 =
         0.03811    0.00154    0.00608    0.00111
W14   8    0.952719    0.579976    0.479745    11.00000    0.02961    0.03060 =
         0.04462    0.00483   -0.00324   -0.00178
W15   8    0.760917    0.585164    0.656650    11.00000    0.03607    0.02849 =
         0.03395    0.00044   -0.00501   -0.00098
W16   8    0.471987    0.565633    0.599449    11.00000    0.03306    0.02441 =
         0.02967   -0.00062    0.00279   -0.00001
W17   8    0.391896    0.543637    0.368075    11.00000    0.02600    0.02356 =
         0.02993   -0.00023    0.00171   -0.00268
W18   8    0.841446    0.514374    0.575102    11.00000    0.02960    0.02444 =
         0.03750    0.00496   -0.00136    0.00124
W19   8    0.547031    0.495139    0.512870    11.00000    0.03084    0.02035 =
         0.03353    0.00115    0.00433   -0.00194
W20   8    0.753771    0.489368    0.324634    11.00000    0.03233    0.02141 =
         0.03602    0.00044    0.00623    0.00177
CO1   3    0.459524    0.700732    0.019622    11.00000    0.02832    0.02183 =
         0.02788    0.00218    0.00108    0.00117
CO2   3    0.276599    0.705006    0.187180    11.00000    0.02468    0.02027 =
         0.02529   -0.00018   -0.00109    0.00130
CO3   3    0.680578    0.660698    0.112329    11.00000    0.02643    0.02265 =
         0.02780    0.00030    0.00331    0.00086
CO4   3    0.370366    0.671331    0.399092    11.00000    0.02866    0.02078 =
         0.02657   -0.00039    0.00203    0.00086
CO5   3    0.594238    0.631773    0.491080    11.00000    0.02864    0.02395 =
         0.02949   -0.00194   -0.00142    0.00121
CO6   3    0.775172    0.627574    0.327863    11.00000    0.02667    0.02301 =
         0.02905    0.00226    0.00044    0.00061
P1    7    0.379820    0.768765    0.094243    11.00000    0.01987    0.01555 =
         0.01487    0.00073    0.00115    0.00146
P2    7    0.670695    0.562929    0.416671    11.00000    0.01972    0.01655 =
         0.02708    0.00184   -0.00004   -0.00102
O1    6    0.267988    0.879661    0.205426    11.00000    0.04748    0.02942 =
         0.03363    0.00711    0.00206   -0.00396
O2    6    0.534721    0.871415   -0.046563    11.00000    0.03687    0.03430 =
         0.03869   -0.00885   -0.00324   -0.00292
O3    6    0.140914    0.845789   -0.123630    11.00000    0.04625    0.04546 =
         0.03415    0.00290   -0.00421   -0.00527
O4    6    0.221747    0.832715    0.066639    11.00000    0.03353    0.03475 =
         0.03234   -0.00642    0.00094    0.00011
O5    6    0.360942    0.829378   -0.064961    11.00000    0.02026    0.03528 =
         0.02735    0.00946    0.00043   -0.00319
O6    6    0.428000    0.845661    0.111487    11.00000    0.03314    0.02292 =
         0.03377   -0.00236    0.00875   -0.00197
O7    6    0.237036    0.790451   -0.159839    11.00000    0.02308    0.02868 =
         0.04483    0.02208   -0.00528    0.00215
O8    6    0.566154    0.810825   -0.096084    11.00000    0.02593    0.03934 =
         0.02500   -0.00966    0.00824   -0.00677
O9    6    0.629257    0.827313    0.079094    11.00000    0.01500    0.02368 =
         0.05164    0.00488    0.00304   -0.00052
O10   6    0.401344    0.834367    0.296112    11.00000    0.02543    0.03389 =
         0.03563   -0.00151    0.00804   -0.00699
O11   6    0.192621    0.821514    0.253527    11.00000    0.02013    0.02058 =
         0.03046    0.00666   -0.00246    0.00039
O12   6    0.086505    0.793777   -0.025230    11.00000    0.02928    0.02326 =
         0.04282   -0.00372    0.01501   -0.00722
O13   6    0.141379    0.740952   -0.094769    11.00000    0.02489    0.02644 =
         0.04527    0.01716    0.00778   -0.00737
O14   6    0.264369    0.734648   -0.263076    11.00000    0.03327    0.02032 =
         0.04442    0.00364    0.00290    0.00297
O15   6    0.432192    0.764873   -0.148122    11.00000    0.01656    0.03792 =
         0.02279    0.00392    0.00126    0.00159
O16   6    0.658074    0.760346   -0.190304    11.00000    0.02503    0.03016 =
         0.02996    0.00438    0.00074    0.00025
O17   6    0.691543    0.775196    0.011703    11.00000    0.01904    0.02266 =
         0.02359    0.00339   -0.00400   -0.00699
O18   6    0.574583    0.803349    0.246418    11.00000    0.02139    0.03412 =
         0.01957    0.00212    0.01198   -0.00159
O19   6    0.789773    0.793510    0.184984    11.00000    0.04842    0.01322 =
         0.03213    0.00631    0.01891    0.00683
O20   6    0.525474    0.803663    0.440238    11.00000    0.03512    0.02260 =
         0.02780    0.00336    0.00763   -0.00104
O21   6    0.312047    0.785787    0.368300    11.00000    0.04526    0.02045 =
         0.01418    0.00263    0.00826    0.00894
O22   6    0.077975    0.777398    0.356992    11.00000    0.03669    0.01584 =
         0.02071    0.00498    0.01040   -0.00567
O23   6    0.109875    0.773699    0.154869    11.00000    0.01833    0.02740 =
         0.03103   -0.00142    0.00357    0.00261
O24   6   -0.038926    0.742594    0.023629    11.00000    0.00503    0.04797 =
         0.06015    0.00108   -0.00323   -0.00885
O25   6    0.486093    0.783327    0.053814    11.00000    0.02523    0.02610 =
         0.03287   -0.00400    0.01044   -0.00031
O26   6    0.284371    0.770185    0.014910    11.00000    0.03093    0.01620 =
         0.04554    0.00326   -0.00039   -0.00007
O27   6    0.344592    0.787372    0.183345    11.00000    0.03626    0.00913 =
         0.02931    0.01045    0.00410    0.00052
O28   6    0.224986    0.737956    0.276047    11.00000    0.03059    0.03097 =
         0.02506   -0.00050    0.01430   -0.00832
O29   6    0.158149    0.717735    0.088491    11.00000    0.03784    0.02132 =
         0.03418    0.00030   -0.01489   -0.00822
O29W  6    0.796537    0.627696    0.078110    11.00000    0.03201    0.02634 =
         0.05035    0.01054    0.00863    0.01128
O30   6    0.345384    0.714403   -0.079646    11.00000    0.02272    0.01524 =
         0.03273   -0.00558   -0.00168   -0.00648
O30W  6    0.732766    0.687042   -0.002678    11.00000    0.03376    0.03057 =
         0.02380    0.00295    0.00817    0.00027
O31   6    0.564992    0.727662   -0.043799    11.00000    0.04166    0.02003 =
         0.03348   -0.00450    0.00346    0.01062
O31W  6    0.255401    0.704727    0.436667    11.00000    0.02782    0.03030 =
         0.02676   -0.00191    0.00447    0.01129
O32   6    0.628816    0.749515    0.181811    11.00000    0.02188    0.01910 =
         0.03901    0.00009    0.00374    0.00081
O32W  6    0.316174    0.644001    0.516992    11.00000    0.04419    0.03438 =
         0.02319   -0.00036    0.00877    0.00284
O33   6    0.487258    0.753980    0.316068    11.00000    0.02625    0.03140 =
         0.02524    0.00173    0.00706    0.00159
O33W  6    0.337832    0.674571    0.084553    11.00000    0.03042    0.01975 =
         0.03224   -0.00275    0.01064   -0.00645
O34   6    0.636542    0.704811    0.330018    11.00000    0.03405    0.03959 =
         0.02689    0.00116    0.01078   -0.00596
O34W  6    0.715615    0.655448    0.427982    11.00000    0.02492    0.01755 =
         0.03616   -0.00625   -0.00310    0.00040
O35   6    0.565374    0.693169    0.139705    11.00000    0.03629    0.01893 =
         0.02586   -0.00510    0.00827   -0.00380
O36   6    0.403430    0.735830    0.125748    11.00000    0.02559    0.01985 =
         0.02140   -0.00008   -0.00633    0.00284
O37   6    0.413135    0.697374    0.281410    11.00000    0.03067    0.02264 =
         0.02865   -0.00378    0.00747   -0.00459
O38   6    0.637394    0.635145    0.231397    11.00000    0.02719    0.01980 =
         0.03383   -0.00940   -0.00243   -0.00510
O39   6    0.416888    0.626588    0.179636    11.00000    0.02783    0.01674 =
         0.03936   -0.00660   -0.00570   -0.00126
O40   6    0.485827    0.638618    0.371057    11.00000    0.01565    0.02698 =
         0.04093    0.01203   -0.00330    0.00621
O41   6    0.423847    0.582301    0.326645    11.00000    0.02063    0.03310 =
         0.01856   -0.00272   -0.00032   -0.00211
O42   6    0.483845    0.602761    0.554540    11.00000    0.01977    0.03738 =
         0.02487   -0.00230   -0.00192   -0.00021
O43   6    0.564947    0.578660    0.197851    11.00000    0.03017    0.01522 =
         0.03136   -0.00424    0.00391   -0.01029
O44   6    0.828181    0.594886    0.238881    11.00000    0.02446    0.03311 =
         0.02780    0.00333   -0.00755   -0.00021
O45   6    0.894046    0.612370    0.420324    11.00000    0.03017    0.03594 =
         0.03048    0.00246    0.00397    0.00636
O46   6    0.704309    0.616810    0.596765    11.00000    0.05307    0.03504 =
         0.02615   -0.00299    0.01594   -0.00536
O47   6    0.779020    0.597780    0.772023    11.00000    0.04595    0.04602 =
         0.03239   -0.00125   -0.01241    0.00014
O48   6    0.907361    0.591448    0.607703    11.00000    0.03420    0.02930 =
         0.03435   -0.00524   -0.00542   -0.01152
O49   6    1.092123    0.587110    0.492972    11.00000    0.03681    0.03689 =
         0.05324    0.01437    0.01231    0.00565
O50   6    0.942197    0.557334    0.358441    11.00000    0.04526    0.01193 =
         0.03175    0.00874   -0.00665   -0.00575
O51   6    0.973161    0.556118    0.156075    11.00000    0.03847    0.03095 =
         0.05420   -0.00250    0.00025    0.01330
O52   6    0.741442    0.546598    0.143741    11.00000    0.01754    0.02078 =
         0.03177   -0.00398   -0.00149    0.00191
O53   6    0.535708    0.530330    0.066973    11.00000    0.04423    0.02519 =
         0.03529   -0.00484    0.01003    0.00128
O54   6    0.479629    0.528666    0.267900    11.00000    0.03195    0.03408 =
         0.03405   -0.00443   -0.00739   -0.00887
O55   6    0.259305    0.538307    0.318254    11.00000    0.02037    0.04253 =
         0.02041   -0.00789   -0.00536   -0.00517
O56   6    0.361511    0.557009    0.496061    11.00000    0.03326    0.01938 =
         0.05291   -0.00519    0.01304    0.00190
O57   6    0.388054    0.568969    0.694864    11.00000    0.04986    0.02734 =
         0.02346   -0.01077    0.00493   -0.00877
O58   6    0.613805    0.565726    0.660313    11.00000    0.03656    0.01775 =
         0.04053   -0.00882    0.01702   -0.00817
O59   6    0.647232    0.596749    0.386738    11.00000    0.02825    0.01925 =
         0.02051   -0.00205   -0.00107    0.00846
O60   6    0.764549    0.562103    0.495892    11.00000    0.01917    0.03783 =
         0.01979   -0.00357   -0.01148    0.00090
O61   6    0.703231    0.544614    0.326442    11.00000    0.02439    0.02673 =
         0.02392   -0.01006    0.00554   -0.00050
O62   6    0.566782    0.548963    0.455817    11.00000    0.02882    0.01503 =
         0.02069   -0.00585   -0.00579    0.00422
O63   6    0.486238    0.520337    0.607949    11.00000    0.03537    0.02933 =
         0.02658    0.00422    0.00258    0.00504
O64   6    0.423046    0.504357    0.429346    11.00000    0.03820    0.02611 =
         0.02784   -0.00710    0.01159   -0.01734
O65   6    0.652186    0.497807    0.214163    11.00000    0.04191    0.02352 =
         0.03797   -0.00352   -0.01087   -0.00115
O66   6    0.862227    0.510983    0.257026    11.00000    0.04292    0.03117 =
         0.04111   -0.01147   -0.00141    0.00707
O67   6    0.959582    0.537557    0.537291    11.00000    0.01859    0.03561 =
         0.05395    0.00693   -0.00028   -0.00117
O68   6    0.814338    0.541921    0.672175    11.00000    0.04633    0.02807 =
         0.02012    0.00581   -0.00532    0.00752
O69   6    0.689109    0.502196    0.574688    11.00000    0.03539    0.02070 =
         0.02571   -0.00574    0.00441    0.00332
O70   6    0.833055    0.497807    0.442083    11.00000    0.02382    0.03655 =
         0.03441   -0.00300   -0.00004    0.01109
O71   6    0.627641    0.486216    0.401111    11.00000    0.03881    0.02565 =
         0.03177    0.00254    0.00325   -0.00676
O72   6    0.789289    0.453802    0.306627    11.00000    0.03804    0.04864 =
         0.04806   -0.00426    0.00224   -0.00811
O73   6    0.513982    0.459312    0.550423    11.00000    0.03949    0.03029 =
         0.03265    0.00027    0.00612   -0.00135
O74   6    0.904365    0.485057    0.637950    11.00000    0.03156    0.02369 =
         0.03459    0.00008    0.00901    0.00639
N1    4    0.505762    0.659556   -0.048244    11.00000    0.03266    0.02343 =
         0.02889   -0.00086    0.00741   -0.00751
N2    4    0.568179    0.640767    0.001042    11.00000    0.02325    0.03508 =
         0.03663    0.00229    0.00450   -0.01752
N3    4    0.811050    0.682386    0.201028    11.00000    0.02962    0.01333 =
         0.01470    0.00464   -0.00128   -0.00430
N4    4    0.854358    0.665474    0.274540    11.00000    0.02102    0.03876 =
         0.03496   -0.00155    0.00825   -0.00196
N5    4    0.478851    0.691518    0.512790    11.00000    0.01740    0.04219 =
         0.03167   -0.00084   -0.00724    0.00872
N6    4    0.543864    0.670935    0.561615    11.00000    0.04038    0.03274 =
         0.02213    0.00549   -0.00734    0.00293
N7    4    0.193765    0.665578    0.236992    11.00000    0.03257    0.02180 =
         0.03298    0.00795    0.00899    0.00931
N8    4    0.244687    0.650015    0.314073    11.00000    0.04134    0.03425 =
         0.03691   -0.00862    0.01728    0.01439
C1    1    0.456482    0.652182   -0.130583    11.00000    0.04090    0.03596 =
         0.03484   -0.00417   -0.00044   -0.00128
AFIX  43
H1    2    0.408212    0.666387   -0.162436    11.00000   -1.20000
AFIX   0
C2    1    0.473056    0.623022   -0.174948    11.00000    0.09241    0.04607 =
         0.06039   -0.03748   -0.04582    0.01889
AFIX  43
H2    2    0.446069    0.618429   -0.239099    11.00000   -1.20000
AFIX   0
C3    1    0.529632    0.602739   -0.118805    11.00000    0.05651    0.04418 =
         0.06888   -0.00953   -0.00974   -0.00430
AFIX  43
H3    2    0.533905    0.582119   -0.138368    11.00000   -1.20000
AFIX   0
C4    1    0.581313    0.612197   -0.032620    11.00000    0.05588    0.02245 =
         0.04202   -0.00449    0.00736   -0.00082
AFIX  43
H4    2    0.626994    0.598382    0.003778    11.00000   -1.20000
AFIX   0
C5    1    0.842476    0.710179    0.181571    11.00000    0.01331    0.04501 =
         0.05327   -0.00224    0.01150   -0.01184
AFIX  43
H5    2    0.812369    0.720223    0.125365    11.00000   -1.20000
AFIX   0
C6    1    0.922031    0.725457    0.244740    11.00000    0.02842    0.02037 =
         0.04461   -0.00094    0.02060    0.00153
AFIX  43
H6    2    0.940347    0.746067    0.233297    11.00000   -1.20000
AFIX   0
C7    1    0.970597    0.710364    0.320427    11.00000    0.02867    0.04099 =
         0.03596    0.00939   -0.00168    0.00027
AFIX  43
H7    2    1.024478    0.719754    0.362796    11.00000   -1.20000
AFIX   0
C8    1    0.936636    0.678966    0.334279    11.00000    0.02897    0.02579 =
         0.07262    0.01443    0.01967    0.00488
AFIX  43
H8    2    0.971404    0.667410    0.385254    11.00000   -1.20000
AFIX   0
C9    1    0.580395    0.678367    0.652789    11.00000    0.03955    0.00835 =
         0.04276    0.00186   -0.03036   -0.00787
AFIX  43
H9    2    0.623313    0.663850    0.688859    11.00000   -1.20000
AFIX   0
C10   1    0.559191    0.705597    0.696256    11.00000    0.06509    0.01939 =
         0.03383   -0.00525   -0.00584   -0.01645
AFIX  43
H10   2    0.584524    0.709537    0.761311    11.00000   -1.20000
AFIX   0
C11   1    0.500020    0.727129    0.642896    11.00000    0.02669    0.04624 =
         0.03659   -0.02476   -0.00033   -0.01295
AFIX  43
H11   2    0.484211    0.746555    0.668684    11.00000   -1.20000
AFIX   0
C12   1    0.465386    0.718856    0.550519    11.00000    0.03981    0.03175 =
         0.03637   -0.00411    0.00102   -0.00535
AFIX  43
H12   2    0.429177    0.733773    0.510743    11.00000   -1.20000
AFIX   0
C13   1    0.209884    0.621339    0.325455    11.00000    0.04526    0.02971 =
         0.03222   -0.00064    0.00663    0.00486
AFIX  43
H13   2    0.246201    0.609463    0.374836    11.00000   -1.20000
AFIX   0
C14   1    0.126834    0.608183    0.271609    11.00000    0.03449    0.02876 =
         0.04230    0.00313   -0.00125   -0.00262
AFIX  43
H14   2    0.101697    0.588366    0.286313    11.00000   -1.20000
AFIX   0
C15   1    0.081696    0.623712    0.197943    11.00000    0.02400    0.05055 =
         0.03180   -0.01130    0.00096   -0.02460
AFIX  43
H15   2    0.025182    0.614943    0.156845    11.00000   -1.20000
AFIX   0
C16   1    0.117496    0.652496    0.181871    11.00000    0.02271    0.03776 =
         0.01556    0.00129   -0.00821   -0.00377
AFIX  43
H16   2    0.085548    0.663478    0.128289    11.00000   -1.20000
AFIX   0
 
CO7   3    0.144430    0.414630    0.450380    11.00000    0.03185    0.02199 =
         0.02833    0.00129    0.00466    0.00134
CO8   3    0.267974    0.349925    0.355609    11.00000    0.03303    0.02297 =
         0.02715   -0.00085    0.00463   -0.00013
CO9   3    0.087579    0.348288    0.543373    11.00000    0.02889    0.02320 =
         0.02934    0.00241    0.00265   -0.00071
O35W  6    0.154873    0.459231    0.494803    11.00000    0.05874    0.01076 =
         0.03281    0.00222    0.01066    0.00416
O36W  6    0.054444    0.427568    0.319117    11.00000    0.04519    0.06314 =
         0.04388    0.02033    0.00433    0.00302
O37W  6    0.171636    0.344499    0.229817    11.00000    0.03417    0.04737 =
         0.03905   -0.00458    0.00475    0.00695
O38W  6   -0.036411    0.323225    0.467988    11.00000    0.03656    0.04714 =
         0.04772   -0.00658   -0.00100   -0.00653
O39W  6    0.393840    0.328656    0.283189    11.00000    0.04101    0.04952 =
         0.02204   -0.00988    0.00678   -0.00064
O40W  6    0.042016    0.328779    0.668173    11.00000    0.03003    0.02925 =
         0.03448   -0.00034    0.00376   -0.00072
O41W  6    0.385626    0.355411    0.471676    11.00000    0.02600    0.01615 =
         0.02604    0.00250    0.00131    0.00266
O75   6    0.131462    0.368902    0.418096    11.00000    0.02443    0.02927 =
         0.02647    0.00397   -0.00473    0.00009
N9    4    0.290351    0.418245    0.364093    11.00000    0.02289    0.02199 =
         0.04017   -0.00408   -0.01172   -0.00213
N10   4    0.318975    0.394427    0.311855    11.00000    0.03052    0.02353 =
         0.04356   -0.02106   -0.00519    0.00435
N11   4    0.228201    0.306716    0.427907    11.00000    0.04411    0.01875 =
         0.02033    0.00476    0.00009   -0.00242
N12   4    0.190628    0.308368    0.517371    11.00000    0.03724    0.01504 =
         0.01966   -0.00394   -0.00773    0.00522
N13   4    0.215699    0.373516    0.615506    11.00000    0.02640    0.02808 =
         0.03127    0.01497   -0.00285    0.00342
N14   4    0.240988    0.400716    0.578982    11.00000    0.02633    0.01552 =
         0.02988    0.00152    0.00249    0.00783
N15   4   -0.032503    0.382811    0.557351    11.00000    0.03519    0.03378 =
         0.02888    0.00858    0.01401    0.01624
N16   4   -0.012786    0.409578    0.514945    11.00000    0.02898    0.03120 =
         0.01815    0.00009   -0.00153    0.00498
C17   1    0.390253    0.399395    0.240468    11.00000    0.05952    0.03963 =
         0.02644   -0.02388    0.01038    0.00196
AFIX  43
H17   2    0.409431    0.382626    0.201383    11.00000   -1.20000
AFIX   0
C18   1    0.435005    0.426208    0.221664    11.00000    0.04112    0.03403 =
         0.05859    0.01206    0.01763   -0.00533
AFIX  43
H18   2    0.483695    0.428124    0.170026    11.00000   -1.20000
AFIX   0
C19   1    0.411555    0.450543    0.275427    11.00000    0.04913    0.02878 =
         0.05903    0.01662   -0.00693   -0.02053
AFIX  43
H19   2    0.444007    0.469805    0.264755    11.00000   -1.20000
AFIX   0
C20   1    0.338078    0.446031    0.346663    11.00000    0.04582    0.00908 =
         0.03941    0.00002    0.01370   -0.01046
AFIX  43
H20   2    0.319156    0.462807    0.385822    11.00000   -1.20000
AFIX   0
C21   1    0.258966    0.280406    0.393895    11.00000    0.04551    0.04441 =
         0.03349   -0.01187    0.00442    0.00844
AFIX  43
H21   2    0.281486    0.278380    0.329153    11.00000   -1.20000
AFIX   0
C22   1    0.257403    0.255479    0.456349    11.00000    0.04283    0.01239 =
         0.05485    0.00102    0.01072    0.00596
AFIX  43
H22   2    0.273317    0.235992    0.431082    11.00000   -1.20000
AFIX   0
C23   1    0.235135    0.257671    0.547730    11.00000    0.05255    0.01708 =
         0.02375    0.01490    0.00231    0.00251
AFIX  43
H23   2    0.243885    0.241447    0.592815    11.00000   -1.20000
AFIX   0
C24   1    0.197284    0.286273    0.571912    11.00000    0.04817    0.06638 =
         0.01035    0.01191   -0.00727   -0.00852
AFIX  43
H24   2    0.174481    0.289045    0.636288    11.00000   -1.20000
AFIX   0
C25   1    0.325545    0.416176    0.614315    11.00000    0.03079    0.03099 =
         0.04884    0.01706    0.00234   -0.01363
AFIX  43
H25   2    0.340084    0.435765    0.589149    11.00000   -1.20000
AFIX   0
C26   1    0.396421    0.403998    0.690317    11.00000    0.04617    0.04809 =
         0.03777    0.00353    0.00009   -0.02997
AFIX  43
H26   2    0.460289    0.414798    0.713258    11.00000   -1.20000
AFIX   0
C27   1    0.372462    0.378247    0.727100    11.00000    0.02172    0.03924 =
         0.02831   -0.01453    0.00107   -0.00324
AFIX  43
H27   2    0.416216    0.370300    0.780187    11.00000   -1.20000
AFIX   0
C28   1    0.279509    0.361536    0.687813    11.00000    0.02534    0.04004 =
         0.02147   -0.01012   -0.00183   -0.00162
AFIX  43
H28   2    0.263095    0.342052    0.712839    11.00000   -1.20000
AFIX   0
C29   1   -0.134753    0.377495    0.590916    11.00000    0.02619    0.05818 =
         0.04062    0.01589   -0.00544   -0.00055
AFIX  43
H29   2   -0.149238    0.358581    0.620822    11.00000   -1.20000
AFIX   0
C30   1   -0.218328    0.399087    0.582428    11.00000    0.02801    0.06463 =
         0.03208    0.00613    0.00331   -0.00019
AFIX  43
H30   2   -0.289955    0.394779    0.603938    11.00000   -1.20000
AFIX   0
C31   1   -0.195370    0.426620    0.542538    11.00000    0.05021    0.03231 =
         0.06129   -0.00050    0.01059    0.01015
AFIX  43
H31   2   -0.247575    0.442698    0.542585    11.00000   -1.20000
AFIX   0
C32   1   -0.095202    0.430409    0.502542    11.00000    0.03128    0.02630 =
         0.06516   -0.01030    0.00300    0.00794
AFIX  43
H32   2   -0.082783    0.448065    0.465065    11.00000   -1.20000
AFIX   0
 
NA1   5    0.298983    0.499578    0.870446    11.00000    0.02469    0.03571 =
         0.02601   -0.00006    0.00516   -0.00227
O42W  6    0.336114    0.497518    0.729700    11.00000    0.16837
O43W  6    0.295645    0.543627    0.866367    11.00000    0.21719
O44W  6    0.284524    0.505720    1.032519    11.00000    0.40301
O45W  6    0.290065    0.456276    0.911650    11.00000    0.19345
O46W  6    0.149915    0.504819    0.816325    11.00000    0.25505
O49W  6    0.452320    0.499685    0.905989    11.00000    0.37325
O4W   6    0.295205    0.672263    0.688567    10.50000    0.06855
O4WA  6    0.236888    0.675399    0.676741    10.50000    0.06455
O3W   6    0.904621    0.689176    0.739825    10.30000    0.06465
O3WA  6    0.828499    0.698859    0.717411    10.70000    0.07118
O2W   6    0.797965    0.543332    0.948728    10.50000    0.08525
O2WA  6    0.741051    0.551658    0.927519    10.50000    0.09683
O5W   6    0.176700    0.456931    0.149573    10.50000    0.09115
O5WA  6    0.219071    0.456139    0.098218    10.50000    0.10490
O1W   6    0.930086    0.400795    0.897845    10.50000    0.08108
O1WA  6    0.901830    0.421581    0.880609    10.50000    0.08854
O6W   6    0.640813    0.510970    0.803204    10.50000    0.08453
O6WA  6    0.621727    0.528872    0.827127    10.50000    0.07853
O7W   6    0.876481    0.667556    0.558807    11.00000    0.07744    0.13675 =
         0.01609    0.00227   -0.01239   -0.04385
O8W   6    0.767567    0.656834    0.837348    11.00000    0.15713    0.05895 =
         0.04760   -0.01793    0.03436   -0.02185
O9W   6    0.961429    0.474385    0.118771    11.00000    0.18491    0.07406 =
         0.20726   -0.05519    0.14520   -0.03032
O10W  6    0.646096    0.455621    0.059385    11.00000    0.14518    0.04576 =
         0.05578    0.00937   -0.00601    0.02065
O11W  6    0.916592    0.414399    0.089855    11.00000    0.08040    0.06326 =
         0.17317    0.00300    0.05109    0.00734
O12W  6    0.697253    0.399911    0.134722    11.00000    0.05514    0.03515 =
         0.05700   -0.01110    0.01130   -0.00227
O13W  6    0.916722    0.368686    0.311460    11.00000    0.04734    0.12044 =
         0.04201   -0.03509   -0.01144    0.01154
O14W  6    0.688939    0.382308    0.332189    11.00000    0.02633    0.05146 =
         0.06596   -0.00892   -0.00247   -0.00227
O15W  6    0.139151    0.392712    0.107199    11.00000    0.11293    0.06345 =
         0.06377    0.03306    0.01110    0.00999
O16W  6    0.615558    0.321640    0.303236    11.00000    0.04658    0.03577 =
         0.05094   -0.00233    0.01492    0.00276
O17W  6    0.952361    0.264776    0.407283    11.00000    0.09063    0.04142 =
         0.05063    0.00428   -0.00977    0.01665
O18W  6    0.128833    0.297473    0.108335    11.00000    0.03579    0.06384 =
         0.05988   -0.03696   -0.00863    0.00650
O19W  6    0.707067    0.280336    0.429332    11.00000    0.06341    0.06098 =
         0.05096    0.00431   -0.00121    0.00479
O20W  6    0.041440    0.250251    0.226252    11.00000    0.06383
O21W  6    0.019341    0.335831    0.865905    11.00000    0.08613    0.15578 =
         0.08158   -0.05302    0.03774   -0.06401
O22W  6    0.195930    0.368103    0.936147    11.00000    0.06348    0.07421 =
         0.05404   -0.02042   -0.00295    0.01482
O23W  6    0.114135    0.414216    0.829897    11.00000    0.21306
O24W  6    0.099835    0.460535    0.689473    11.00000    0.12427
O25W  6    0.081628    0.499445    0.366109    11.00000    0.02913    0.09904 =
         0.06093    0.02041   -0.00622   -0.01089
O26W  6    0.183672    0.527828    0.594868    11.00000    0.03743    0.12713 =
         0.09606    0.04266   -0.00927   -0.00549
O27W  6    0.955947    0.502444    0.955006    11.00000    0.10378    0.04394 =
         0.07710    0.01914    0.05849    0.02691
O28W  6    0.077921    0.699623    0.548216    11.00000    0.06424    0.06695 =
         0.03395   -0.00358    0.00700   -0.00472
O47W  6    0.536192    0.400492    0.462151    11.00000    0.03789    0.03130 =
         0.06029   -0.01000    0.02365   -0.01352
O48W  6    0.205560    0.546888    1.125186    11.00000    0.18593
HKLF 4
 
REM  Integration of 151009c
REM R1 =  0.0419 for  23108 Fo > 4sig(Fo)  and  0.0508 for all  26848 data
REM   1781 parameters refined using     33 restraints
 
END  
     
WGHT      0.0506      0.0000 
REM Highest difference peak  1.797,  deepest hole -1.333,  1-sigma level  0.249
Q1    1   0.2013  0.8392 -0.0657  11.00000  0.05    1.80
Q2    1   0.5411  0.7384  0.2414  11.00000  0.05    1.74
Q3    1   0.2602  0.7797  0.3191  11.00000  0.05    1.64
Q4    1   0.3341  0.5425  0.3200  11.00000  0.05    1.61
Q5    1   0.1454  0.7798  0.2220  11.00000  0.05    1.59
Q6    1   0.1449  0.7784  0.3317  11.00000  0.05    1.56
Q7    1   0.1659  0.8190 -0.1161  11.00000  0.05    1.54
Q8    1   0.8640  0.5815  0.2358  11.00000  0.05    1.51
Q9    1   1.0043  0.5807  0.5380  11.00000  0.05    1.48
Q10   1   0.6399  0.5407  0.2328  11.00000  0.05    1.45
Q11   1   0.2387  0.8211  0.0048  11.00000  0.05    1.44
Q12   1   0.2437  0.8404  0.1411  11.00000  0.05    1.40
Q13   1   0.9309  0.6004  0.4561  11.00000  0.05    1.39
Q14   1   0.5203  0.7622 -0.1442  11.00000  0.05    1.37
Q15   1   0.4049  0.8000  0.2833  11.00000  0.05    1.36
Q16   1   0.5888  0.4984  0.5781  11.00000  0.05    1.35
Q17   1   0.5567  0.5389  0.1192  11.00000  0.05    1.35
Q18   1   0.5577  0.8402  0.0435  11.00000  0.05    1.34
Q19   1   0.8361  0.5399  0.5673  11.00000  0.05    1.30
Q20   1   0.2997  0.8209  0.1827  11.00000  0.05    1.30
Q21   1   0.5622  0.7182  0.3086  11.00000  0.05    1.30
Q22   1   0.2632  0.8173 -0.1091  11.00000  0.05    1.29
Q23   1   0.5839  0.5217  0.1821  11.00000  0.05    1.29
Q24   1   0.5353  0.7028  0.2383  11.00000  0.05    1.26
Q25   1   0.2315  0.7991 -0.0431  11.00000  0.05    1.26
Q26   1   0.4537  0.8186  0.3252  11.00000  0.05    1.26
Q27   1   0.5046  0.7986  0.3861  11.00000  0.05    1.26
Q28   1   0.1855  0.8008  0.2692  11.00000  0.05    1.24
Q29   1   0.5876  0.5586  0.1789  11.00000  0.05    1.23
Q30   1   0.4664  0.7172  0.2591  11.00000  0.05    1.23
Q31   1   0.3027  0.8589  0.1772  11.00000  0.05    1.23
Q32   1   0.5573  0.7624 -0.0246  11.00000  0.05    1.20
Q33   1   0.6219  0.7191  0.2770  11.00000  0.05    1.19
Q34   1   0.8949  0.5593  0.2962  11.00000  0.05    1.19
Q35   1   0.3518  0.8417  0.2361  11.00000  0.05    1.19
Q36   1   0.8165  0.4793  0.9133  11.00000  0.05    1.19
Q37   1   0.8932  0.5176  0.6209  11.00000  0.05    1.19
Q38   1   0.2981  0.8198 -0.0377  11.00000  0.05    1.16
Q39   1   0.7020  0.7828  0.1979  11.00000  0.05    1.15
Q40   1   0.4160  0.5400  0.4325  11.00000  0.05    1.15
Q41   1   0.4790  0.8386  0.0625  11.00000  0.05    1.14
Q42   1   0.2938  0.7196 -0.1492  11.00000  0.05    1.14
Q43   1   0.4839  0.7182  0.1923  11.00000  0.05    1.13
Q44   1   0.5049  0.6375  0.2681  11.00000  0.05    1.13
Q45   1   0.4672  0.6185  0.2179  11.00000  0.05    1.13
Q46   1   0.5158  0.6204  0.3258  11.00000  0.05    1.13
Q47   1   0.5180  0.8211  0.0106  11.00000  0.05    1.11
Q48   1   0.1936  0.7595  0.2704  11.00000  0.05    1.11
Q49   1   0.0799  0.7829  0.0366  11.00000  0.05    1.10
Q50   1   0.4962  0.8607 -0.0134  11.00000  0.05    1.10
Q51   1   0.7460  0.5573  0.6445  11.00000  0.05    1.10
Q52   1   0.4774  0.7814  0.3150  11.00000  0.05    1.09
Q53   1   0.7372  0.5862  0.7297  11.00000  0.05    1.09
Q54   1   0.5465  0.5196  0.5058  11.00000  0.05    1.09
Q55   1   0.3884  0.5591  0.3586  11.00000  0.05    1.09
Q56   1   0.2704  0.8439  0.2476  11.00000  0.05    1.09
Q57   1   0.8210  0.5823  0.6985  11.00000  0.05    1.08
Q58   1   0.4256  0.7818  0.3408  11.00000  0.05    1.07
Q59   1   0.8949  0.5171  0.5223  11.00000  0.05    1.07
Q60   1   0.4783  0.5419  0.3824  11.00000  0.05    1.06
Q61   1   0.8052  0.5586  0.1821  11.00000  0.05    1.06
Q62   1   0.3233  0.5431  0.3853  11.00000  0.05    1.06
Q63   1   0.4873  0.5416  0.5911  11.00000  0.05    1.04
Q64   1   0.5856  0.7388 -0.0838  11.00000  0.05    1.03
Q65   1   0.3227  0.7403 -0.0772  11.00000  0.05    1.03
Q66   1   0.4492  0.8387 -0.0517  11.00000  0.05    1.01
Q67   1   0.8916  0.5800  0.4163  11.00000  0.05    1.01
Q68   1   0.5180  0.6034  0.2628  11.00000  0.05    1.00
Q69   1   0.4273  0.5623  0.5464  11.00000  0.05    1.00
Q70   1   0.2429  0.7788  0.2375  11.00000  0.05    0.99
Q71   1   0.4635  0.8000  0.2589  11.00000  0.05    0.99
Q72   1   0.3881  0.7975  0.3564  11.00000  0.05    0.99
Q73   1   0.1132  0.7452 -0.0325  11.00000  0.05    0.98
Q74   1   0.8489  0.5592  0.2998  11.00000  0.05    0.98
Q75   1   0.5502  0.8382 -0.0459  11.00000  0.05    0.98
Q76   1   0.4025  0.5636  0.6187  11.00000  0.05    0.98
Q77   1   0.6553  0.7610 -0.0624  11.00000  0.05    0.97
Q78   1   0.7624  0.5938  0.5874  11.00000  0.05    0.97
Q79   1   0.1760  0.8204 -0.0007  11.00000  0.05    0.96
Q80   1   0.6236  0.7614 -0.0373  11.00000  0.05    0.96
Q81   1   0.5038  0.4990  0.4561  11.00000  0.05    0.96
Q82   1   0.3532  0.6193  0.5413  11.00000  0.05    0.95
Q83   1   0.3817  0.5225  0.3605  11.00000  0.05    0.95
Q84   1   0.9225  0.5802  0.5454  11.00000  0.05    0.95
Q85   1   0.9514  0.5588  0.4556  11.00000  0.05    0.94
Q86   1   0.5534  0.4781  0.5260  11.00000  0.05    0.94
Q87   1   0.0381  0.7540  0.0770  11.00000  0.05    0.94
Q88   1   0.3314  0.8436  0.1298  11.00000  0.05    0.93
Q89   1   0.6789  0.7862  0.0796  11.00000  0.05    0.93
Q90   1   0.2267  0.2411  0.4687  11.00000  0.05    0.92
Q91   1   0.1737  0.6606 -0.0437  11.00000  0.05    0.92
Q92   1   0.6451  0.5380  0.1361  11.00000  0.05    0.91
Q93   1   0.2455  0.4807  0.9530  11.00000  0.05    0.91
Q94   1   0.3030  0.7472 -0.2178  11.00000  0.05    0.90
Q95   1   0.2446  0.7446 -0.2029  11.00000  0.05    0.90
Q96   1   0.6874  0.5863  0.6773  11.00000  0.05    0.89
Q97   1   0.8172  0.5180  0.5028  11.00000  0.05    0.89
Q98   1   0.5914  0.7182  0.2051  11.00000  0.05    0.89
Q99   1   0.1857  0.6575 -0.0846  11.00000  0.05    0.88
Q100  1   0.5209  0.5384  0.2029  11.00000  0.05    0.88
Q101  1   0.2394  0.5776  1.2046  11.00000  0.05    0.87
Q102  1   0.5621  0.6179  0.2225  11.00000  0.05    0.87
Q103  1   0.0688  0.7474  0.0949  11.00000  0.05    0.86
Q104  1   0.8771  0.2398  0.4365  11.00000  0.05    0.85
Q105  1   0.5479  0.7798 -0.0996  11.00000  0.05    0.85
Q106  1   0.3500  0.7580 -0.1737  11.00000  0.05    0.84
Q107  1   0.6655  0.7626  0.1439  11.00000  0.05    0.84
Q108  1   0.1796  0.7541  0.0221  11.00000  0.05    0.84
Q109  1   0.7179  0.5862  0.5939  11.00000  0.05    0.83
Q110  1   0.5921  0.6244  0.2949  11.00000  0.05    0.82
Q111  1   1.0239  0.5819  0.4345  11.00000  0.05    0.82
Q112  1   0.4627  0.5730  0.6585  11.00000  0.05    0.82
Q113  1   0.2998  0.4652  0.9497  11.00000  0.05    0.82
Q114  1   0.5128  0.5654  0.5477  11.00000  0.05    0.81
Q115  1   0.8536  0.5424  0.2297  11.00000  0.05    0.81
Q116  1   0.0892  0.6809  0.7466  11.00000  0.05    0.81
Q117  1   0.7461  0.5188  0.3160  11.00000  0.05    0.81
Q118  1   0.1244  0.3192  0.0581  11.00000  0.05    0.81
Q119  1   0.7941  0.4925  0.2741  11.00000  0.05    0.81
Q120  1   0.9445  0.5525  0.2141  11.00000  0.05    0.80
Q121  1   0.4109  0.3404  0.3968  11.00000  0.05    0.80
Q122  1   0.1831  0.5186  0.6549  11.00000  0.05    0.80
Q123  1   0.4215  0.4793  1.0299  11.00000  0.05    0.79
Q124  1   0.7280  0.7884  0.1115  11.00000  0.05    0.79
Q125  1   0.8183  0.6801  0.5471  11.00000  0.05    0.77
Q126  1   0.2401  0.7417 -0.0803  11.00000  0.05    0.76
Q127  1   0.1316  0.3578  0.1287  11.00000  0.05    0.76
Q128  1   0.4366  0.5614  0.7408  11.00000  0.05    0.75
Q129  1   0.8238  0.8188  0.0952  11.00000  0.05    0.74
Q130  1   0.7358  0.6181  0.0218  11.00000  0.05    0.74
Q131  1   0.1232  0.5010  0.8248  11.00000  0.05    0.74
Q132  1   0.4835  0.7013  0.0614  11.00000  0.05    0.73
Q133  1   0.5716  0.4848  0.4645  11.00000  0.05    0.73
Q134  1   0.8891  0.5567  0.1661  11.00000  0.05    0.73
Q135  1   0.8303  0.4925  0.3163  11.00000  0.05    0.73
Q136  1   0.4336  0.5395  0.3167  11.00000  0.05    0.72
Q137  1   0.5050  0.8243 -0.0563  11.00000  0.05    0.72
Q138  1   0.9398  0.5951  0.9440  11.00000  0.05    0.72
Q139  1   0.0680  0.2972  0.0867  11.00000  0.05    0.72
Q140  1   0.4658  0.6791  0.0242  11.00000  0.05    0.71
Q141  1   0.3895  0.5389  0.8632  11.00000  0.05    0.71
Q142  1   0.0806  0.3194  0.5417  11.00000  0.05    0.71
Q143  1   0.3698  0.3593  0.5284  11.00000  0.05    0.71
Q144  1   0.6392  0.4423  0.7957  11.00000  0.05    0.71
Q145  1   0.5831  0.7852  0.1569  11.00000  0.05    0.70
Q146  1   0.6270  0.7953  0.2007  11.00000  0.05    0.70
Q147  1   0.5548  0.5599  0.6123  11.00000  0.05    0.70
Q148  1   0.7995  0.7203  0.7405  11.00000  0.05    0.70
Q149  1   0.6116  0.7798 -0.1089  11.00000  0.05    0.70
Q150  1   0.8002  0.4616  0.8356  11.00000  0.05    0.69
Q151  1   0.6705  0.3982  0.2643  11.00000  0.05    0.69
Q152  1   0.7225  0.4928  0.3834  11.00000  0.05    0.69
Q153  1   1.0799  0.5807  0.7384  11.00000  0.05    0.69
Q154  1   0.3773  0.4765  0.2571  11.00000  0.05    0.69
Q155  1   0.4649  0.4222  0.9412  11.00000  0.05    0.69
Q156  1   1.0360  0.2574  0.3992  11.00000  0.05    0.68
Q157  1   0.3678  0.6421  0.4832  11.00000  0.05    0.68
Q158  1   0.2339  0.4226  0.0566  11.00000  0.05    0.68
Q159  1   0.9461  0.7185  0.7415  11.00000  0.05    0.67
Q160  1   0.0378  0.4347  0.2653  11.00000  0.05    0.67
Q161  1   0.8273  0.6787  0.6156  11.00000  0.05    0.67
Q162  1   0.2441  0.4862  0.6433  11.00000  0.05    0.67
Q163  1   0.9787  0.6333 -0.0390  11.00000  0.05    0.67
Q164  1   0.8177  0.6570  0.8609  11.00000  0.05    0.67
Q165  1   0.4973  0.7615 -0.0824  11.00000  0.05    0.66
Q166  1   0.2260  0.7185  0.4125  11.00000  0.05    0.66
Q167  1   0.6271  0.3436  0.2577  11.00000  0.05    0.66
Q168  1   0.9796  0.5183  0.8219  11.00000  0.05    0.66
Q169  1   0.0512  0.7801 -0.0640  11.00000  0.05    0.66
Q170  1   0.6391  0.6600  0.0481  11.00000  0.05    0.66
Q171  1   0.6727  0.2789  0.3412  11.00000  0.05    0.66
Q172  1   0.1171  0.8201  0.2370  11.00000  0.05    0.66
Q173  1   0.5132  0.7989  0.0699  11.00000  0.05    0.66
Q174  1  -0.0977  0.4231  0.2842  11.00000  0.05    0.65
Q175  1   0.9563  0.6187  0.3167  11.00000  0.05    0.65
Q176  1   0.1965  0.5206  0.7623  11.00000  0.05    0.65
Q177  1   0.2068  0.4829  0.6812  11.00000  0.05    0.65
Q178  1   0.0901  0.4199  0.3931  11.00000  0.05    0.65
Q179  1   0.0978  0.5572  0.8679  11.00000  0.05    0.64
Q180  1   0.6021  0.4681  0.7985  11.00000  0.05    0.64
Q181  1   0.4056  0.6207  0.5004  11.00000  0.05    0.64
Q182  1   0.4567  0.3790  0.5144  11.00000  0.05    0.64
Q183  1   0.4868  0.8222  0.4436  11.00000  0.05    0.64
Q184  1   0.2078  0.3753  1.0349  11.00000  0.05    0.63
Q185  1   0.5419  0.6407 -0.0635  11.00000  0.05    0.63
Q186  1   0.8484  0.6162  0.2715  11.00000  0.05    0.63
Q187  1   0.6533  0.4984  0.7953  11.00000  0.05    0.63
Q188  1   0.1397  0.4173  0.3221  11.00000  0.05    0.63
Q189  1   0.4738  0.6427 -0.2547  11.00000  0.05    0.62
Q190  1   0.7918  0.4862  0.3801  11.00000  0.05    0.62
Q191  1   0.0994  0.7012  0.6339  11.00000  0.05    0.62
Q192  1   0.2416  0.6187 -0.1896  11.00000  0.05    0.62
Q193  1   0.9165  0.3988  0.9270  11.00000  0.05    0.62
Q194  1   0.1049  0.2398  0.1442  11.00000  0.05    0.62
Q195  1   0.7431  0.6649  0.1695  11.00000  0.05    0.62
Q196  1   0.2221  0.7556 -0.1260  11.00000  0.05    0.61
Q197  1   0.5327  0.6002 -0.0462  11.00000  0.05    0.61
Q198  1   0.7294  0.3630  0.3453  11.00000  0.05    0.61
Q199  1   0.4976  0.7859  0.1068  11.00000  0.05    0.61
Q200  1   0.0668  0.6354  0.1618  11.00000  0.05    0.61

  REM The information below was added by Olex2.
  REM
  REM R1 = 0.0419 for 23108 Fo > 4sig(Fo) and 0.0508 for all 46405 data
  REM n/a parameters refined using n/a restraints
  REM Highest difference peak 1.80, deepest hole -1.33
  REM Mean Shift 0, Max Shift 0.003.
  
  REM +++ Tabular Listing of Refinement Information +++
  REM R1_all = 0.0508
  REM R1_gt = 0.0419
  REM wR_ref = 0.0993
  REM GOOF = 0.996
  REM Shift_max = 0.003
  REM Shift_mean = 0
  REM Reflections_all = 46405
  REM Reflections_gt = 23108
  REM Parameters = n/a
  REM Hole = -1.33
  REM Peak = 1.80
  REM Flack = 0.044(8)
  
  
;
_olex2_submission_special_instructions 'No special instructions were received'
loop_
  _refln_index_h
  _refln_index_k
  _refln_index_l
  _refln_F_squared_meas
  _refln_F_squared_sigma
  _refln_scale_group_code
 -2 0 0 67 21 1
 -2 0 0 70 25 1
 3 0 0 20750 715 1
 -3 0 0 21004 729 1
 -3 0 0 20332 697 1
 -4 0 0 2764 128 1
 -4 0 0 2876 139 1
 4 0 0 2788 121 1
 5 0 0 2134 94 1
 -5 0 0 2334 107 1
 -5 0 0 2205 113 1
 -6 0 0 233 45 1
 -6 0 0 231 43 1
 6 0 0 261 34 1
 7 0 0 70 27 1
 -7 0 0 54 39 1
 -7 0 0 64 34 1
 -8 0 0 66 45 1
 8 0 0 32 28 1
 -8 0 0 48 35 1
 9 0 0 335 45 1
 -9 0 0 329 52 1
 -9 0 0 329 61 1
 -10 0 0 108 51 1
 -10 0 0 111 45 1
 -11 0 0 442 74 1
 -11 0 0 296 54 1
 -12 0 0 269 72 1
 -12 0 0 432 65 1
 -13 0 0 180 57 1
 -13 0 0 82 62 1
 -14 0 0 613 83 1
 -2 -1 0 5313 192 1
 -2 -1 0 5273 183 1
 -2 1 0 5297 191 1
 -2 1 0 5244 182 1
 -3 -1 0 4230 185 1
 -3 -1 0 3979 174 1
 3 -1 0 4305 173 1
 3 1 0 4116 170 1
 -3 1 0 4837 187 1
 -3 1 0 4533 176 1
 -4 -1 0 1309 80 1
 4 -1 0 1362 66 1
 -4 -1 0 1325 72 1
 -4 1 0 1558 77 1
 4 1 0 1716 69 1
 -4 1 0 1772 85 1
 -5 -1 0 3368 165 1
 -5 -1 0 3499 156 1
 5 -1 0 3534 148 1
 5 1 0 3482 147 1
 -5 1 0 3411 165 1
 -5 1 0 3532 157 1
 6 -1 0 783 51 1
 -6 -1 0 790 75 1
 -6 -1 0 877 65 1
 -6 1 0 592 59 1
 6 1 0 556 46 1
 -6 1 0 475 60 1
 -7 -1 0 394 61 1
 7 -1 0 488 48 1
 -7 -1 0 510 58 1
 7 1 0 567 51 1
 -7 1 0 748 75 1
 -7 1 0 615 63 1
 -8 -1 0 228 47 1
 8 -1 0 197 36 1
 8 1 0 225 38 1
 -8 1 0 196 45 1
 -8 1 0 217 52 1
 -9 -1 0 2792 146 1
 9 -1 0 2854 133 1
 -9 -1 0 2880 160 1
 -9 1 0 2591 144 1
 -9 1 0 2535 153 1
 -10 -1 0 3674 178 1
 -10 -1 0 3903 202 1
 -10 1 0 3601 179 1
 -10 1 0 3709 193 1
 -11 -1 0 4092 220 1
 -11 -1 0 3908 194 1
 -11 1 0 4483 202 1
 -11 1 0 4288 214 1
 -12 -1 0 1093 106 1
 -12 -1 0 949 91 1
 -12 1 0 931 89 1
 -12 1 0 1064 108 1
 -13 -1 0 439 88 1
 -13 -1 0 454 74 1
 -13 1 0 380 65 1
 -13 1 0 301 76 1
 -14 -1 0 516 82 1
 -14 1 0 482 88 1
 -14 1 0 573 76 1
 -2 -2 0 4534 169 1
 -2 -2 0 4772 181 1
 -2 2 0 4211 167 1
 -3 -2 0 865 56 1
 -3 -2 0 894 64 1
 3 -2 0 816 51 1
 3 2 0 814 48 1
 -3 2 0 1017 59 1
 -3 2 0 1001 61 1
 -4 -2 0 1411 84 1
 4 -2 0 1388 68 1
 -4 -2 0 1432 78 1
 -4 2 0 1155 74 1
 -4 2 0 1181 78 1
 4 2 0 1115 64 1
 -5 -2 0 3128 157 1
 -5 -2 0 3425 149 1
 5 -2 0 3175 139 1
 -5 2 0 3171 145 1
 -5 2 0 3356 155 1
 5 2 0 3436 139 1
 6 -2 0 1266 76 1
 -6 -2 0 1425 87 1
 -6 -2 0 1418 98 1
 6 2 0 1541 79 1
 -6 2 0 1468 89 1
 -6 2 0 1500 97 1
 -7 -2 0 692 77 1
 -7 -2 0 695 66 1
 7 -2 0 568 49 1
 7 2 0 589 52 1
 -7 2 0 623 62 1
 -7 2 0 612 69 1
 -8 -2 0 5341 223 1
 8 -2 0 5360 211 1
 -8 -2 0 5481 240 1
 8 2 0 5313 209 1
 -8 2 0 5007 219 1
 -8 2 0 5193 233 1
 -9 -2 0 1508 102 1
 9 -2 0 1581 88 1
 -9 -2 0 1562 114 1
 -9 2 0 1575 104 1
 -9 2 0 1330 109 1
 -10 -2 0 3372 185 1
 -10 -2 0 3458 172 1
 -10 2 0 3750 173 1
 -10 2 0 3400 182 1
 -11 -2 0 3369 198 1
 -11 -2 0 3161 166 1
 -11 2 0 3625 188 1
 -11 2 0 3272 171 1
 -12 -2 0 319 61 1
 -12 -2 0 185 65 1
 -12 2 0 102 43 1
 -12 2 0 222 67 1
 -13 -2 0 1358 138 1
 -13 -2 0 1620 117 1
 -13 2 0 1303 111 1
 -13 2 0 1370 122 1
 -14 -2 0 897 94 1
 -14 2 0 1031 112 1
 2 -3 0 14635 551 1
 -2 -3 0 14736 532 1
 -2 -3 0 14795 557 1
 -2 3 0 14890 533 1
 -3 -3 0 1444 71 1
 -3 -3 0 1608 81 1
 3 -3 0 1626 69 1
 3 3 0 1567 64 1
 -3 3 0 1593 71 1
 -3 3 0 1585 73 1
 -4 -3 0 363 44 1
 4 -3 0 428 42 1
 -4 -3 0 271 46 1
 4 3 0 386 38 1
 -4 3 0 308 42 1
 -4 3 0 364 49 1
 5 -3 0 670 52 1
 -5 -3 0 633 71 1
 -5 -3 0 604 57 1
 -5 3 0 531 62 1
 -5 3 0 670 65 1
 5 3 0 539 47 1
 6 -3 0 112 28 1
 -6 -3 0 114 42 1
 -6 -3 0 124 36 1
 6 3 0 130 28 1
 -6 3 0 134 34 1
 -6 3 0 202 44 1
 7 -3 0 2270 110 1
 -7 -3 0 2327 123 1
 -7 -3 0 2196 131 1
 7 3 0 2372 109 1
 -7 3 0 2301 130 1
 -7 3 0 2364 123 1
 8 -3 0 1357 79 1
 -8 -3 0 1418 92 1
 -8 -3 0 1225 99 1
 -8 3 0 1496 102 1
 -8 3 0 1453 93 1
 8 3 0 1534 81 1
 -9 -3 0 2038 118 1
 -9 -3 0 2066 126 1
 9 -3 0 1943 101 1
 -9 3 0 2062 125 1
 -9 3 0 2197 118 1
 -10 -3 0 213 51 1
 -10 -3 0 266 62 1
 -10 3 0 236 48 1
 -10 3 0 340 63 1
 -11 -3 0 4800 219 1
 -11 -3 0 4767 242 1
 -11 3 0 5152 224 1
 -11 3 0 5068 243 1
 -12 -3 0 203 69 1
 -12 -3 0 210 55 1
 -12 3 0 208 66 1
 -12 3 0 193 50 1
 -13 -3 0 194 49 1
 -13 -3 0 227 67 1
 -13 3 0 242 60 1
 -13 3 0 194 63 1
 -14 -3 0 23 51 1
 -14 3 0 60 60 1
 -14 3 0 17 50 1
 -2 -4 0 345 38 1
 2 -4 0 341 34 1
 -2 -4 0 380 36 1
 -3 -4 0 2431 101 1
 3 -4 0 2578 103 1
 -3 -4 0 2306 110 1
 3 4 0 2553 97 1
 -3 4 0 2655 103 1
 -4 -4 0 3681 159 1
 4 -4 0 3382 140 1
 -4 -4 0 3285 143 1
 -4 4 0 3530 149 1
 -4 4 0 3383 144 1
 4 4 0 3349 137 1
 5 -4 0 1914 100 1
 -5 -4 0 2034 117 1
 -5 -4 0 1935 106 1
 5 4 0 2486 100 1
 -5 4 0 2430 116 1
 -5 4 0 2414 110 1
 -6 -4 0 1292 84 1
 -6 -4 0 1226 93 1
 6 -4 0 1233 74 1
 6 4 0 1341 72 1
 -6 4 0 1358 82 1
 -6 4 0 1506 91 1
 -7 -4 0 5945 249 1
 -7 -4 0 5969 268 1
 7 -4 0 5889 241 1
 -7 4 0 5898 248 1
 -7 4 0 5681 258 1
 7 4 0 5819 238 1
 -8 -4 0 1402 106 1
 8 -4 0 1438 82 1
 -8 -4 0 1420 92 1
 -8 4 0 1397 91 1
 -8 4 0 1587 103 1
 8 4 0 1403 79 1
 -9 -4 0 823 83 1
 9 -4 0 699 62 1
 -9 -4 0 888 93 1
 -9 4 0 870 90 1
 -9 4 0 925 87 1
 -10 -4 0 1541 108 1
 -10 -4 0 1744 124 1
 -10 4 0 1826 125 1
 -10 4 0 1756 115 1
 -11 -4 0 4535 230 1
 -11 -4 0 4316 205 1
 -11 4 0 4442 219 1
 -11 4 0 4675 210 1
 -12 -4 0 0 39 1
 -12 -4 0 29 49 1
 -12 4 0 0 35 1
 -12 4 0 11 48 1
 -13 -4 0 350 79 1
 -13 -4 0 285 63 1
 -13 4 0 301 66 1
 -13 4 0 92 52 1
 -14 -4 0 563 101 1
 -14 -4 0 518 75 1
 -14 4 0 573 83 1
 -1 -5 0 1326 72 1
 -1 5 0 1092 74 1
 -1 5 0 1014 64 1
 -2 -5 0 1529 73 1
 -2 -5 0 1634 81 1
 2 -5 0 1499 76 1
 2 5 0 1585 72 1
 -2 5 0 1659 74 1
 -2 5 0 1552 74 1
 3 -5 0 981 54 1
 -3 -5 0 906 64 1
 -3 -5 0 911 55 1
 3 5 0 770 47 1
 -3 5 0 820 50 1
 -4 -5 0 13397 482 1
 4 -5 0 13117 493 1
 -4 -5 0 13372 508 1
 -4 5 0 12641 480 1
 4 5 0 13195 487 1
 5 -5 0 957 61 1
 -5 -5 0 1077 80 1
 -5 -5 0 941 68 1
 -5 5 0 715 65 1
 -5 5 0 776 64 1
 5 5 0 665 53 1
 6 -5 0 2531 118 1
 -6 -5 0 2538 135 1
 -6 -5 0 2449 123 1
 -6 5 0 2634 131 1
 -6 5 0 2363 121 1
 6 5 0 2340 111 1
 -7 -5 0 2739 159 1
 7 -5 0 2966 140 1
 -7 -5 0 2905 149 1
 -7 5 0 3439 152 1
 7 5 0 3287 138 1
 -7 5 0 3017 156 1
 8 -5 0 2452 112 1
 -8 -5 0 2329 124 1
 -8 -5 0 2172 135 1
 -8 5 0 2133 119 1
 8 5 0 2078 105 1
 -8 5 0 2306 129 1
 -9 -5 0 25 43 1
 9 -5 0 55 30 1
 -9 -5 0 71 36 1
 -9 5 0 66 34 1
 -9 5 0 67 41 1
 -10 -5 0 6506 286 1
 -10 -5 0 5956 259 1
 -10 5 0 5924 261 1
 -10 5 0 6112 274 1
 -11 -5 0 1848 135 1
 -11 -5 0 1814 114 1
 -11 5 0 1776 130 1
 -11 5 0 1993 121 1
 -12 -5 0 238 51 1
 -12 -5 0 262 68 1
 -12 5 0 272 63 1
 -12 5 0 209 55 1
 -13 -5 0 832 95 1
 -13 -5 0 770 102 1
 -13 5 0 735 93 1
 -13 5 0 697 81 1
 -14 -5 0 695 95 1
 -14 5 0 707 94 1
 0 6 0 353 35 1
 -1 -6 0 4201 152 1
 1 6 0 4181 151 1
 -1 6 0 4054 155 1
 2 -6 0 3602 160 1
 -2 -6 0 3609 163 1
 -2 -6 0 3788 153 1
 -2 6 0 3688 152 1
 2 6 0 3582 154 1
 -2 6 0 3521 154 1
 -3 -6 0 955 72 1
 3 -6 0 1012 66 1
 -3 -6 0 1134 64 1
 -3 6 0 1008 63 1
 -3 6 0 1048 64 1
 3 6 0 1054 60 1
 4 -6 0 2640 123 1
 -4 -6 0 2813 124 1
 -4 -6 0 2723 136 1
 4 6 0 2363 116 1
 -4 6 0 2706 125 1
 5 -6 0 584 51 1
 -5 -6 0 475 51 1
 -5 -6 0 759 73 1
 5 6 0 516 45 1
 -5 6 0 650 54 1
 -6 -6 0 2861 143 1
 -6 -6 0 2990 158 1
 6 -6 0 2863 138 1
 -6 6 0 2998 148 1
 6 6 0 2921 131 1
 -6 6 0 2835 143 1
 -7 -6 0 6448 259 1
 7 -6 0 6061 252 1
 -7 -6 0 6281 278 1
 -7 6 0 6236 267 1
 -7 6 0 6188 258 1
 7 6 0 5945 246 1
 -8 -6 0 1231 104 1
 -8 -6 0 1077 88 1
 8 -6 0 1246 81 1
 -8 6 0 1194 96 1
 -8 6 0 1390 94 1
 8 6 0 1274 77 1
 -9 -6 0 3150 169 1
 9 -6 0 3108 143 1
 -9 -6 0 3094 157 1
 -9 6 0 3018 155 1
 -9 6 0 3052 161 1
 -10 -6 0 75 52 1
 -10 -6 0 91 40 1
 -10 6 0 138 43 1
 -10 6 0 157 52 1
 -11 -6 0 83 56 1
 -11 -6 0 67 41 1
 -11 6 0 223 58 1
 -11 6 0 132 43 1
 -12 -6 0 464 90 1
 -12 -6 0 729 81 1
 -12 6 0 551 82 1
 -12 6 0 511 72 1
 -13 -6 0 1290 100 1
 -13 6 0 1212 117 1
 -13 6 0 1489 105 1
 -14 -6 0 179 60 1
 -14 6 0 195 60 1
 -1 -7 0 2247 100 1
 1 7 0 2267 101 1
 -1 7 0 2150 105 1
 -2 -7 0 20036 733 1
 2 -7 0 20613 731 1
 -2 -7 0 20604 699 1
 -2 7 0 20034 698 1
 -2 7 0 19776 731 1
 2 7 0 19531 723 1
 -2 7 0 19235 721 1
 3 -7 0 955 62 1
 -3 -7 0 954 66 1
 -3 -7 0 976 59 1
 -3 7 0 1014 59 1
 -3 7 0 992 58 1
 3 7 0 988 55 1
 4 -7 0 3765 160 1
 -4 -7 0 3783 171 1
 -4 -7 0 3606 156 1
 4 7 0 4134 155 1
 -4 7 0 4063 160 1
 -4 7 0 4260 164 1
 -5 -7 0 6073 250 1
 5 -7 0 5735 230 1
 -5 -7 0 5565 228 1
 5 7 0 5088 221 1
 -5 7 0 5378 228 1
 6 -7 0 4981 215 1
 -6 -7 0 4922 233 1
 -6 -7 0 5084 216 1
 -6 7 0 5506 220 1
 6 7 0 5350 210 1
 7 -7 0 232 40 1
 -7 -7 0 246 46 1
 -7 -7 0 268 56 1
 -7 7 0 291 49 1
 7 7 0 292 38 1
 -7 7 0 319 49 1
 8 -7 0 2690 128 1
 -8 -7 0 2683 156 1
 -8 -7 0 2776 138 1
 -8 7 0 2447 136 1
 -8 7 0 2531 140 1
 8 7 0 2683 123 1
 -9 -7 0 919 95 1
 9 -7 0 981 69 1
 -9 -7 0 886 82 1
 -9 7 0 980 89 1
 -9 7 0 979 86 1
 -10 -7 0 144 55 1
 -10 -7 0 207 51 1
 -10 7 0 258 57 1
 -10 7 0 225 50 1
 -11 -7 0 556 87 1
 -11 -7 0 740 82 1
 -11 7 0 842 90 1
 -11 7 0 728 77 1
 -12 -7 0 877 92 1
 -12 -7 0 811 97 1
 -12 7 0 622 79 1
 -12 7 0 758 89 1
 -13 -7 0 185 70 1
 -13 -7 0 252 63 1
 -13 7 0 305 64 1
 -14 -7 0 42 64 1
 -14 -7 0 58 52 1
 -14 7 0 26 45 1
 0 -8 0 759 44 1
 0 8 0 791 56 1
 -1 -8 0 305 31 1
 1 8 0 176 30 1
 -1 8 0 311 40 1
 -2 -8 0 2348 114 1
 -2 8 0 2456 113 1
 2 8 0 2535 107 1
 -2 8 0 2483 103 1
 -2 8 0 2490 102 1
 3 -8 0 669 58 1
 -3 -8 0 640 60 1
 -3 -8 0 646 52 1
 -3 8 0 681 49 1
 -3 8 0 597 50 1
 3 8 0 660 49 1
 4 -8 0 22912 829 1
 -4 -8 0 23174 800 1
 -4 -8 0 23394 842 1
 -4 8 0 22974 828 1
 4 8 0 22745 821 1
 -4 8 0 22705 800 1
 -5 -8 0 10021 380 1
 5 -8 0 9290 387 1
 -5 -8 0 9338 403 1
 -5 8 0 10291 381 1
 -5 8 0 10079 392 1
 5 8 0 10312 382 1
 -6 -8 0 1702 109 1
 6 -8 0 1831 96 1
 -6 -8 0 1901 101 1
 6 8 0 1725 87 1
 -6 8 0 1603 95 1
 -7 -8 0 3017 146 1
 -7 -8 0 2927 161 1
 7 -8 0 2943 140 1
 -7 8 0 3079 145 1
 7 8 0 2933 133 1
 -8 -8 0 828 78 1
 8 -8 0 704 62 1
 -8 -8 0 701 83 1
 8 8 0 773 58 1
 -8 8 0 734 73 1
 -8 8 0 898 80 1
 9 -8 0 114 36 1
 -9 -8 0 108 40 1
 -9 -8 0 165 60 1
 -9 8 0 143 46 1
 -9 8 0 150 42 1
 -10 -8 0 573 78 1
 -10 -8 0 462 67 1
 -10 8 0 386 65 1
 -10 8 0 337 56 1
 -11 -8 0 487 84 1
 -11 -8 0 490 71 1
 -11 8 0 495 67 1
 -11 8 0 380 68 1
 -12 -8 0 1588 143 1
 -12 -8 0 1500 113 1
 -12 8 0 1595 112 1
 -12 8 0 1609 124 1
 -13 -8 0 74 64 1
 -13 -8 0 125 51 1
 -13 8 0 92 52 1
 -14 -8 0 88 47 1
 -14 8 0 97 55 1
 1 -9 0 1722 80 1
 -1 -9 0 1790 88 1
 1 9 0 1988 94 1
 -1 9 0 1851 99 1
 -2 -9 0 1017 69 1
 -2 9 0 892 56 1
 -2 9 0 829 52 1
 -2 9 0 906 70 1
 2 9 0 788 60 1
 -3 -9 0 3652 175 1
 -3 -9 0 3951 163 1
 3 -9 0 3738 171 1
 -3 9 0 3468 158 1
 3 9 0 3203 158 1
 -3 9 0 3332 158 1
 4 -9 0 18417 679 1
 -4 -9 0 18694 691 1
 -4 -9 0 18291 655 1
 4 9 0 18958 673 1
 -4 9 0 18419 676 1
 -4 9 0 18568 656 1
 -5 -9 0 5378 244 1
 -5 -9 0 5309 224 1
 5 -9 0 5348 229 1
 -5 9 0 5629 231 1
 -5 9 0 5118 223 1
 5 9 0 5428 221 1
 6 -9 0 170 38 1
 -6 -9 0 116 44 1
 -6 -9 0 129 39 1
 6 9 0 90 30 1
 -6 9 0 192 42 1
 -6 9 0 170 40 1
 -7 -9 0 2222 116 1
 -7 -9 0 2048 129 1
 7 -9 0 2093 109 1
 -7 9 0 2122 113 1
 7 9 0 2132 103 1
 -8 -9 0 3269 181 1
 -8 -9 0 3570 168 1
 8 -9 0 3630 163 1
 -8 9 0 3483 168 1
 8 9 0 3423 153 1
 9 -9 0 4704 202 1
 -9 -9 0 4679 232 1
 -9 -9 0 4495 211 1
 -9 9 0 4575 209 1
 -9 9 0 4187 211 1
 -10 -9 0 7948 329 1
 -10 -9 0 7895 356 1
 -10 9 0 8083 339 1
 -10 9 0 7786 325 1
 -11 -9 0 437 68 1
 -11 -9 0 456 78 1
 -11 9 0 601 74 1
 -11 9 0 577 69 1
 -12 -9 0 61 59 1
 -12 -9 0 141 48 1
 -12 9 0 29 51 1
 -12 9 0 131 49 1
 -13 -9 0 1311 138 1
 -13 -9 0 990 105 1
 -13 9 0 1257 106 1
 -14 -9 0 686 93 1
 -14 9 0 805 95 1
 0 -10 0 503 45 1
 0 10 0 456 56 1
 -1 -10 0 2760 133 1
 1 -10 0 2675 122 1
 -1 10 0 2740 145 1
 1 10 0 2664 138 1
 -2 -10 0 1976 106 1
 -2 10 0 1874 92 1
 2 10 0 1965 102 1
 -2 10 0 1931 111 1
 -3 -10 0 10718 397 1
 3 -10 0 10598 416 1
 -3 -10 0 10493 420 1
 -3 10 0 10636 404 1
 -3 10 0 10039 394 1
 3 10 0 10970 408 1
 -4 -10 0 6220 262 1
 4 -10 0 6729 277 1
 -4 -10 0 6711 284 1
 4 10 0 7136 269 1
 -4 10 0 6871 266 1
 -4 10 0 7623 273 1
 5 -10 0 431 52 1
 -5 -10 0 617 71 1
 -5 -10 0 410 49 1
 -5 10 0 618 58 1
 -5 10 0 754 61 1
 5 10 0 645 51 1
 6 -10 0 2351 122 1
 -6 -10 0 2351 139 1
 -6 -10 0 2316 123 1
 6 10 0 2234 113 1
 -6 10 0 2240 123 1
 -6 10 0 2408 124 1
 7 -10 0 1748 98 1
 -7 -10 0 1840 117 1
 -7 -10 0 1716 100 1
 -7 10 0 1739 103 1
 -7 10 0 1704 103 1
 7 10 0 1658 90 1
 -8 -10 0 1434 113 1
 -8 -10 0 1523 100 1
 8 -10 0 1447 92 1
 8 10 0 1602 87 1
 -8 10 0 1496 99 1
 -9 -10 0 4499 227 1
 -9 -10 0 4702 210 1
 9 -10 0 4790 201 1
 -9 10 0 4309 202 1
 -10 -10 0 11803 496 1
 -10 -10 0 12053 469 1
 -10 10 0 12239 466 1
 -11 -10 0 1439 124 1
 -11 -10 0 1271 106 1
 -11 10 0 1298 102 1
 -11 10 0 1382 110 1
 -12 -10 0 49 46 1
 -12 -10 0 69 58 1
 -12 10 0 17 43 1
 -13 -10 0 693 86 1
 -13 -10 0 508 91 1
 -13 10 0 728 88 1
 -14 -10 0 756 87 1
 -14 10 0 677 88 1
 -1 -11 0 5909 219 1
 1 -11 0 5970 209 1
 -1 11 0 5318 229 1
 1 11 0 5489 224 1
 -2 -11 0 1338 83 1
 2 11 0 1568 84 1
 -2 11 0 1490 92 1
 -2 11 0 1453 71 1
 -3 -11 0 1833 107 1
 3 -11 0 1927 106 1
 -3 -11 0 1928 94 1
 -3 11 0 1746 88 1
 3 11 0 1808 95 1
 -3 11 0 1907 94 1
 -4 -11 0 3 26 1
 -4 -11 0 36 31 1
 4 -11 0 44 30 1
 4 11 0 122 30 1
 -4 11 0 88 29 1
 -4 11 0 57 30 1
 -5 -11 0 7132 270 1
 5 -11 0 6892 278 1
 -5 -11 0 7048 292 1
 -5 11 0 6219 265 1
 5 11 0 6313 266 1
 -5 11 0 6466 271 1
 6 -11 0 2322 125 1
 -6 -11 0 2522 127 1
 -6 -11 0 2454 143 1
 -6 11 0 2498 127 1
 -6 11 0 2426 127 1
 6 11 0 2660 120 1
 -7 -11 0 444 70 1
 -7 -11 0 389 52 1
 7 -11 0 410 51 1
 -7 11 0 380 55 1
 -7 11 0 491 58 1
 7 11 0 461 48 1
 8 -11 0 346 50 1
 -8 -11 0 287 51 1
 -8 -11 0 226 62 1
 -8 11 0 249 47 1
 8 11 0 252 41 1
 -8 11 0 316 53 1
 9 -11 0 688 70 1
 -9 -11 0 712 89 1
 -9 -11 0 821 82 1
 -9 11 0 660 75 1
 -10 -11 0 1032 109 1
 -10 -11 0 865 87 1
 -10 11 0 740 77 1
 -11 -11 0 2154 128 1
 -11 -11 0 2240 153 1
 -11 11 0 2211 131 1
 -12 -11 0 120 65 1
 -12 -11 0 137 52 1
 -12 11 0 157 52 1
 -13 -11 0 245 62 1
 -13 -11 0 212 67 1
 -13 11 0 216 58 1
 -14 -11 0 216 64 1
 -14 -11 0 49 66 1
 -14 11 0 223 64 1
 0 -12 0 3366 152 1
 0 12 0 3423 171 1
 1 -12 0 10288 375 1
 -1 -12 0 10185 384 1
 -1 12 0 9927 395 1
 1 12 0 10714 394 1
 -2 -12 0 1788 105 1
 -2 12 0 1915 91 1
 2 12 0 1853 105 1
 -2 12 0 1828 114 1
 -3 -12 0 1059 66 1
 3 -12 0 1032 70 1
 -3 -12 0 1023 75 1
 -3 12 0 785 64 1
 -3 12 0 659 68 1
 3 12 0 700 57 1
 -3 12 0 694 52 1
 -4 -12 0 3926 167 1
 4 -12 0 4077 179 1
 -4 -12 0 4020 186 1
 -4 12 0 3738 165 1
 4 12 0 3575 164 1
 -4 12 0 3548 162 1
 -5 -12 0 4066 188 1
 -5 -12 0 3689 199 1
 5 -12 0 3893 192 1
 5 12 0 4555 186 1
 -5 12 0 4422 189 1
 -5 12 0 4588 191 1
 -6 -12 0 872 74 1
 6 -12 0 911 75 1
 -6 -12 0 798 86 1
 -6 12 0 898 74 1
 -6 12 0 895 72 1
 6 12 0 910 67 1
 7 -12 0 276 45 1
 -7 -12 0 245 48 1
 -7 -12 0 245 53 1
 -7 12 0 291 51 1
 7 12 0 301 43 1
 -7 12 0 347 51 1
 -8 -12 0 410 57 1
 8 -12 0 457 57 1
 -8 -12 0 577 80 1
 -8 12 0 533 66 1
 -8 12 0 380 54 1
 8 12 0 495 53 1
 -9 -12 0 2097 123 1
 9 -12 0 2005 114 1
 -9 -12 0 2155 141 1
 -9 12 0 2018 122 1
 -9 12 0 1819 117 1
 -10 -12 0 1209 95 1
 -10 -12 0 1273 123 1
 -10 12 0 1250 99 1
 -10 12 0 1067 94 1
 -11 -12 0 204 53 1
 -11 -12 0 84 51 1
 -11 12 0 18 35 1
 -12 -12 0 2222 137 1
 -12 -12 0 1943 154 1
 -12 12 0 2233 135 1
 -13 -12 0 383 85 1
 -13 -12 0 458 78 1
 -13 12 0 467 70 1
 -14 -12 0 295 83 1
 -14 12 0 542 83 1
 -1 -13 0 6006 236 1
 1 -13 0 5962 226 1
 -1 13 0 5438 247 1
 1 13 0 5701 244 1
 -2 -13 0 471 53 1
 -2 13 0 615 46 1
 2 13 0 630 60 1
 -2 13 0 496 65 1
 -3 -13 0 798 71 1
 -3 13 0 748 63 1
 -3 13 0 845 75 1
 3 13 0 826 65 1
 -3 13 0 694 54 1
 -4 -13 0 3258 166 1
 4 -13 0 3104 159 1
 -4 -13 0 3316 151 1
 -4 13 0 3298 147 1
 -4 13 0 3248 149 1
 4 13 0 3304 151 1
 -5 -13 0 132 44 1
 -5 -13 0 85 33 1
 5 -13 0 68 34 1
 -5 13 0 77 31 1
 -5 13 0 96 32 1
 5 13 0 92 31 1
 -6 -13 0 662 83 1
 -6 -13 0 636 68 1
 6 -13 0 530 65 1
 -6 13 0 547 64 1
 -6 13 0 419 56 1
 6 13 0 441 52 1
 7 -13 0 1312 88 1
 -7 -13 0 1415 91 1
 -7 -13 0 1412 107 1
 7 13 0 1438 82 1
 -7 13 0 1320 88 1
 -7 13 0 1266 89 1
 -8 -13 0 795 89 1
 8 -13 0 957 75 1
 -8 -13 0 1003 81 1
 -8 13 0 1055 83 1
 -8 13 0 1012 83 1
 8 13 0 1073 75 1
 -9 -13 0 470 63 1
 9 -13 0 475 59 1
 -9 -13 0 450 76 1
 -9 13 0 456 64 1
 -9 13 0 449 61 1
 -10 -13 0 1101 109 1
 -10 -13 0 1215 92 1
 -10 13 0 1234 99 1
 -10 13 0 1310 98 1
 -11 -13 0 380 81 1
 -11 -13 0 433 69 1
 -11 13 0 396 60 1
 -12 -13 0 443 77 1
 -12 -13 0 499 94 1
 -12 13 0 565 77 1
 -13 -13 0 448 89 1
 -13 -13 0 453 75 1
 -13 13 0 351 63 1
 -14 -13 0 953 96 1
 -14 -13 0 863 115 1
 -14 13 0 963 106 1
 0 -14 0 22405 798 1
 0 14 0 22022 816 1
 -1 -14 0 6944 275 1
 1 -14 0 6758 265 1
 -1 14 0 6512 288 1
 1 14 0 7058 289 1
 -2 -14 0 1273 85 1
 -2 14 0 1065 91 1
 2 14 0 1110 85 1
 -2 14 0 1248 71 1
 -3 -14 0 569 65 1
 -3 14 0 845 55 1
 3 14 0 609 62 1
 -3 14 0 932 84 1
 4 -14 0 2185 125 1
 -4 -14 0 2280 116 1
 -4 -14 0 2268 129 1
 4 14 0 2221 115 1
 -4 14 0 2240 109 1
 -4 14 0 2277 116 1
 -5 -14 0 2093 127 1
 5 -14 0 1962 116 1
 -5 -14 0 1919 109 1
 -5 14 0 2287 110 1
 -5 14 0 2267 112 1
 5 14 0 2136 110 1
 -6 -14 0 1660 99 1
 6 -14 0 1614 105 1
 -6 -14 0 1673 114 1
 -6 14 0 2041 104 1
 6 14 0 1941 99 1
 -6 14 0 1884 103 1
 -7 -14 0 411 58 1
 -7 -14 0 374 66 1
 7 -14 0 475 60 1
 -7 14 0 440 57 1
 -7 14 0 587 68 1
 7 14 0 510 54 1
 8 -14 0 2759 139 1
 -8 -14 0 2530 140 1
 -8 -14 0 2658 160 1
 8 14 0 2751 132 1
 -8 14 0 2734 142 1
 -8 14 0 2565 141 1
 9 -14 0 2527 135 1
 -9 -14 0 2477 154 1
 -9 -14 0 2402 138 1
 -9 14 0 2559 140 1
 -9 14 0 2628 140 1
 -10 -14 0 11817 489 1
 -10 -14 0 11916 461 1
 -10 14 0 11730 467 1
 -10 14 0 11471 452 1
 -11 -14 0 1256 109 1
 -11 -14 0 1411 137 1
 -11 14 0 1278 98 1
 -12 -14 0 242 55 1
 -12 -14 0 90 67 1
 -12 14 0 270 59 1
 -13 -14 0 755 107 1
 -13 -14 0 579 78 1
 -13 14 0 603 83 1
 -14 -14 0 694 104 1
 -14 14 0 879 99 1
 1 -15 0 2374 111 1
 -1 -15 0 2310 118 1
 -1 15 0 2434 135 1
 1 15 0 2469 130 1
 -2 -15 0 247 43 1
 2 -15 0 238 33 1
 -2 15 0 193 49 1
 2 15 0 209 48 1
 -3 -15 0 1076 83 1
 -3 15 0 1041 63 1
 -3 15 0 787 80 1
 3 15 0 1070 76 1
 -4 -15 0 2641 135 1
 4 -15 0 2502 134 1
 -4 -15 0 2387 120 1
 -4 15 0 2259 112 1
 4 15 0 2185 118 1
 -4 15 0 2331 118 1
 5 -15 0 477 59 1
 -5 -15 0 392 59 1
 -5 -15 0 513 58 1
 -5 15 0 235 40 1
 -5 15 0 312 48 1
 5 15 0 223 41 1
 6 -15 0 1364 93 1
 -6 -15 0 1442 91 1
 -6 -15 0 1133 101 1
 -6 15 0 950 80 1
 6 15 0 1114 80 1
 -6 15 0 993 80 1
 -7 -15 0 773 76 1
 7 -15 0 717 72 1
 -7 -15 0 733 81 1
 -7 15 0 798 72 1
 -7 15 0 826 78 1
 7 15 0 760 66 1
 -8 -15 0 218 65 1
 8 -15 0 260 49 1
 -8 -15 0 201 49 1
 -8 15 0 241 49 1
 8 15 0 261 45 1
 -8 15 0 288 52 1
 -9 -15 0 580 72 1
 9 -15 0 777 74 1
 -9 -15 0 617 86 1
 -9 15 0 665 73 1
 -9 15 0 641 74 1
 -10 -15 0 352 63 1
 -10 -15 0 499 83 1
 -10 15 0 430 66 1
 -11 -15 0 747 103 1
 -11 -15 0 641 77 1
 -11 15 0 657 77 1
 -12 -15 0 58 51 1
 -12 -15 0 22 62 1
 -12 15 0 31 46 1
 -13 -15 0 109 70 1
 -13 -15 0 187 64 1
 -13 15 0 230 61 1
 -14 -15 0 326 84 1
 -14 -15 0 363 76 1
 -14 15 0 402 77 1
 0 -16 0 528 53 1
 1 -16 0 2670 120 1
 -1 -16 0 2631 127 1
 1 16 0 2584 140 1
 -1 16 0 2348 140 1
 -2 -16 0 312 54 1
 2 -16 0 215 37 1
 -2 16 0 444 69 1
 2 16 0 311 55 1
 -3 -16 0 1958 116 1
 -3 16 0 2134 124 1
 -3 16 0 1992 95 1
 3 16 0 1736 107 1
 -4 -16 0 535 58 1
 4 -16 0 665 73 1
 -4 -16 0 600 69 1
 -4 16 0 525 56 1
 -4 16 0 615 51 1
 4 16 0 585 62 1
 -5 -16 0 1749 93 1
 -5 -16 0 1387 101 1
 5 -16 0 1447 96 1
 5 16 0 1175 81 1
 -5 16 0 1156 79 1
 -5 16 0 1168 82 1
 -6 -16 0 1116 87 1
 -6 -16 0 1152 101 1
 6 -16 0 1128 90 1
 -6 16 0 1258 88 1
 -6 16 0 1241 83 1
 6 16 0 1239 83 1
 -7 -16 0 68 38 1
 7 -16 0 50 38 1
 -7 -16 0 36 44 1
 7 16 0 72 34 1
 -7 16 0 72 37 1
 -7 16 0 78 36 1
 -8 -16 0 1971 135 1
 -8 -16 0 2004 116 1
 8 -16 0 1932 116 1
 8 16 0 1882 105 1
 -8 16 0 1730 110 1
 -8 16 0 1682 110 1
 9 -16 0 1111 90 1
 -9 -16 0 1308 121 1
 -9 -16 0 1066 91 1
 -9 16 0 1148 91 1
 -9 16 0 1224 96 1
 -10 -16 0 81 57 1
 -10 -16 0 37 42 1
 -10 16 0 54 44 1
 -11 -16 0 357 66 1
 -11 -16 0 507 94 1
 -11 16 0 276 58 1
 -12 -16 0 902 111 1
 -12 -16 0 866 94 1
 -12 16 0 939 96 1
 -13 -16 0 342 72 1
 -13 -16 0 346 85 1
 -13 16 0 366 72 1
 -14 -16 0 428 79 1
 -14 -16 0 449 92 1
 -14 16 0 402 78 1
 1 -17 0 1707 95 1
 -1 -17 0 1673 102 1
 -1 17 0 1969 123 1
 1 17 0 2002 120 1
 2 -17 0 6574 244 1
 -2 -17 0 5956 258 1
 2 17 0 5623 259 1
 -2 17 0 5717 272 1
 -3 -17 0 1482 104 1
 -3 17 0 1636 113 1
 3 17 0 1706 104 1
 -3 17 0 1575 85 1
 4 -17 0 54 37 1
 -4 -17 0 104 37 1
 -4 -17 0 51 36 1
 4 17 0 29 32 1
 -4 17 0 49 27 1
 5 -17 0 5710 267 1
 -5 -17 0 6141 253 1
 -5 -17 0 5965 273 1
 -5 17 0 6220 249 1
 5 17 0 6139 257 1
 -5 17 0 5807 249 1
 -6 -17 0 7104 296 1
 6 -17 0 6994 311 1
 -6 -17 0 6929 320 1
 6 17 0 7465 301 1
 -6 17 0 7862 300 1
 -6 17 0 7588 299 1
 -7 -17 0 41 37 1
 7 -17 0 19 34 1
 -7 -17 0 8 44 1
 -7 17 0 11 33 1
 -7 17 0 42 36 1
 7 17 0 1 28 1
 8 -17 0 5870 250 1
 -8 -17 0 5448 267 1
 -8 -17 0 5644 244 1
 -8 17 0 5273 239 1
 8 17 0 5326 236 1
 -8 17 0 5174 237 1
 -9 -17 0 560 86 1
 -9 -17 0 602 73 1
 9 -17 0 556 68 1
 -9 17 0 473 66 1
 -10 -17 0 5 52 1
 -10 -17 0 20 40 1
 -10 17 0 0 35 1
 -11 -17 0 43 60 1
 -11 -17 0 178 51 1
 -11 17 0 150 51 1
 -12 -17 0 346 83 1
 -12 17 0 340 65 1
 -13 -17 0 243 63 1
 -13 -17 0 268 78 1
 -13 17 0 312 68 1
 -14 -17 0 307 85 1
 -14 17 0 383 75 1
 0 -18 0 6369 254 1
 0 18 0 6068 273 1
 -1 -18 0 8787 353 1
 1 -18 0 9130 347 1
 1 18 0 9094 371 1
 -1 18 0 9085 376 1
 -2 -18 0 911 78 1
 2 -18 0 851 61 1
 -2 18 0 1140 96 1
 2 18 0 1035 81 1
 -3 -18 0 2315 136 1
 -3 18 0 2383 147 1
 -3 18 0 2594 118 1
 3 18 0 2511 136 1
 -4 -18 0 265 50 1
 -4 -18 0 339 50 1
 4 -18 0 298 56 1
 -4 18 0 436 47 1
 4 18 0 331 52 1
 -5 -18 0 10210 425 1
 5 -18 0 10419 422 1
 -5 -18 0 10465 400 1
 -5 18 0 10548 397 1
 5 18 0 9722 407 1
 -5 18 0 10061 395 1
 6 -18 0 18234 680 1
 -6 -18 0 18737 653 1
 -6 -18 0 18127 690 1
 6 18 0 17562 666 1
 -6 18 0 17333 659 1
 -6 18 0 17440 648 1
 7 -18 0 367 62 1
 -7 -18 0 340 57 1
 -7 -18 0 369 69 1
 -7 18 0 345 54 1
 -7 18 0 367 53 1
 7 18 0 358 53 1
 -8 -18 0 85 44 1
 -8 -18 0 106 57 1
 8 -18 0 96 42 1
 -8 18 0 106 39 1
 -8 18 0 107 38 1
 8 18 0 145 39 1
 9 -18 0 165 47 1
 -9 -18 0 174 46 1
 -9 -18 0 125 59 1
 -9 18 0 116 48 1
 -10 -18 0 230 66 1
 -10 -18 0 226 59 1
 -10 18 0 330 59 1
 -11 -18 0 24 61 1
 -11 -18 0 1 44 1
 -11 18 0 42 44 1
 -12 -18 0 45 49 1
 -12 -18 0 19 62 1
 -12 18 0 15 45 1
 -13 -18 0 70 63 1
 -13 -18 0 85 56 1
 -13 18 0 58 50 1
 -14 -18 0 55 57 1
 -14 18 0 124 59 1
 -1 -19 0 797 71 1
 1 -19 0 894 62 1
 1 19 0 794 79 1
 -1 19 0 949 93 1
 -2 -19 0 1363 95 1
 2 -19 0 1374 81 1
 -2 19 0 1449 109 1
 2 19 0 1338 102 1
 -3 -19 0 2865 152 1
 3 -19 0 2821 131 1
 3 19 0 3072 153 1
 -3 19 0 2866 163 1
 -4 -19 0 2562 141 1
 4 -19 0 2197 138 1
 -4 19 0 2185 140 1
 4 19 0 2172 127 1
 -4 19 0 2361 113 1
 -5 -19 0 641 78 1
 -5 -19 0 837 79 1
 5 -19 0 722 81 1
 -5 19 0 733 61 1
 5 19 0 762 73 1
 -6 -19 0 20880 775 1
 -6 -19 0 20842 818 1
 6 -19 0 20966 809 1
 -6 19 0 21505 775 1
 6 19 0 21285 798 1
 -6 19 0 21766 790 1
 -7 -19 0 2306 142 1
 7 -19 0 2246 132 1
 -7 -19 0 2363 129 1
 -7 19 0 2236 121 1
 7 19 0 2239 122 1
 -7 19 0 2370 126 1
 -8 -19 0 0 47 1
 -8 -19 0 21 36 1
 8 -19 0 11 39 1
 8 19 0 8 32 1
 -8 19 0 53 41 1
 -8 19 0 52 39 1
 9 -19 0 185 49 1
 -9 -19 0 266 54 1
 -9 -19 0 108 54 1
 -9 19 0 205 54 1
 -10 -19 0 30 38 1
 -10 -19 0 138 56 1
 -10 19 0 161 50 1
 -11 -19 0 555 93 1
 -11 -19 0 743 85 1
 -11 19 0 557 74 1
 -12 -19 0 361 89 1
 -12 -19 0 177 51 1
 -12 19 0 273 63 1
 -13 -19 0 107 70 1
 -13 -19 0 120 61 1
 -13 19 0 196 59 1
 -14 -19 0 391 96 1
 -14 19 0 263 60 1
 0 -20 0 3557 171 1
 0 20 0 3924 198 1
 1 -20 0 1294 78 1
 -1 -20 0 1164 84 1
 -1 20 0 1208 111 1
 1 20 0 1204 98 1
 2 -20 0 2254 112 1
 -2 -20 0 2070 124 1
 -2 20 0 2419 148 1
 2 20 0 2488 140 1
 3 -20 0 9981 373 1
 -3 -20 0 9821 396 1
 3 20 0 9588 395 1
 -3 20 0 9773 410 1
 4 -20 0 1431 111 1
 -4 -20 0 1247 104 1
 -4 20 0 1638 116 1
 -4 20 0 1705 87 1
 4 20 0 1585 102 1
 -5 -20 0 7186 323 1
 5 -20 0 7343 324 1
 -5 -20 0 7612 305 1
 -5 20 0 7774 297 1
 5 20 0 8075 314 1
 -6 -20 0 4514 217 1
 -6 -20 0 4373 201 1
 6 -20 0 4628 215 1
 -6 20 0 4340 196 1
 6 20 0 4308 201 1
 -6 20 0 4359 190 1
 -7 -20 0 3981 190 1
 7 -20 0 4140 201 1
 -7 -20 0 4128 210 1
 -7 20 0 4122 183 1
 -7 20 0 4074 190 1
 7 20 0 4126 188 1
 -8 -20 0 451 63 1
 -8 -20 0 328 71 1
 8 -20 0 424 64 1
 -8 20 0 431 63 1
 8 20 0 410 56 1
 9 -20 0 373 62 1
 -9 -20 0 372 74 1
 -9 -20 0 579 73 1
 -9 20 0 428 61 1
 10 -20 0 78 45 1
 -10 -20 0 78 57 1
 -10 -20 0 2 41 1
 -10 20 0 88 48 1
 -11 -20 0 870 90 1
 -11 -20 0 638 95 1
 -11 20 0 725 80 1
 -12 -20 0 357 90 1
 -12 -20 0 329 71 1
 -12 20 0 392 70 1
 -13 -20 0 344 72 1
 -13 20 0 594 78 1
 -1 -21 0 2227 124 1
 1 -21 0 2576 122 1
 1 21 0 2367 143 1
 -1 21 0 2254 144 1
 -2 -21 0 5215 233 1
 2 -21 0 5645 221 1
 2 21 0 5526 245 1
 -2 21 0 5451 255 1
 -3 -21 0 776 81 1
 3 -21 0 744 59 1
 3 21 0 677 76 1
 -3 21 0 924 100 1
 -4 -21 0 60 41 1
 -4 21 0 115 33 1
 4 21 0 112 42 1
 -4 21 0 206 54 1
 -5 -21 0 19667 745 1
 -5 -21 0 19513 705 1
 5 -21 0 19609 745 1
 5 21 0 19765 731 1
 -5 21 0 18617 710 1
 -6 -21 0 5105 218 1
 -6 -21 0 5308 240 1
 6 -21 0 5077 231 1
 -6 21 0 4625 203 1
 6 21 0 4671 217 1
 -7 -21 0 197 48 1
 7 -21 0 246 57 1
 -7 -21 0 261 65 1
 -7 21 0 158 44 1
 7 21 0 186 46 1
 -7 21 0 196 44 1
 8 -21 0 1477 107 1
 -8 -21 0 1369 103 1
 -8 -21 0 1271 112 1
 8 21 0 1533 100 1
 -8 21 0 1429 104 1
 -9 -21 0 635 90 1
 9 -21 0 716 81 1
 -9 -21 0 533 71 1
 -9 21 0 740 83 1
 -10 -21 0 202 53 1
 10 -21 0 235 56 1
 -10 -21 0 252 74 1
 -10 21 0 257 55 1
 -11 -21 0 333 82 1
 -11 -21 0 299 68 1
 -11 21 0 245 57 1
 -12 -21 0 465 88 1
 -12 -21 0 436 78 1
 -12 21 0 581 79 1
 -13 -21 0 126 51 1
 -13 -21 0 63 73 1
 -13 21 0 10 45 1
 0 -22 0 2813 140 1
 0 22 0 2909 166 1
 1 -22 0 4204 187 1
 -1 -22 0 4018 194 1
 -1 22 0 4214 220 1
 1 22 0 4414 216 1
 -2 -22 0 3760 180 1
 2 -22 0 3798 165 1
 -2 22 0 3165 194 1
 2 22 0 3839 190 1
 -3 -22 0 813 85 1
 3 -22 0 776 60 1
 3 22 0 777 83 1
 -3 22 0 588 83 1
 -4 -22 0 4775 228 1
 -4 22 0 4865 239 1
 4 22 0 4580 220 1
 -4 22 0 4721 198 1
 -5 -22 0 28685 1003 1
 5 -22 0 28380 1054 1
 -5 -22 0 27796 1049 1
 5 22 0 28268 1038 1
 -5 22 0 28448 1018 1
 -6 -22 0 15927 635 1
 -6 -22 0 15912 604 1
 6 -22 0 16645 635 1
 6 22 0 15774 618 1
 -6 22 0 15845 603 1
 7 -22 0 33 42 1
 -7 -22 0 39 38 1
 -7 -22 0 23 48 1
 -7 22 0 18 37 1
 7 22 0 68 38 1
 -8 -22 0 485 66 1
 8 -22 0 337 61 1
 -8 -22 0 377 76 1
 -8 22 0 493 67 1
 8 22 0 520 65 1
 -9 -22 0 311 72 1
 9 -22 0 226 55 1
 -9 -22 0 265 58 1
 -9 22 0 179 53 1
 -10 -22 0 103 49 1
 10 -22 0 132 55 1
 -10 -22 0 127 65 1
 -10 22 0 55 43 1
 -11 -22 0 196 56 1
 -11 -22 0 199 73 1
 -11 22 0 234 54 1
 -12 -22 0 0 63 1
 -12 -22 0 68 51 1
 -12 22 0 46 49 1
 -13 -22 0 76 65 1
 -13 -22 0 156 60 1
 -13 22 0 119 58 1
 -1 -23 0 1386 96 1
 1 -23 0 1276 86 1
 -1 23 0 1536 118 1
 1 23 0 1532 110 1
 2 -23 0 338 43 1
 -2 -23 0 375 53 1
 -2 23 0 354 66 1
 2 23 0 319 58 1
 3 -23 0 710 57 1
 -3 -23 0 552 70 1
 -3 23 0 779 94 1
 3 23 0 768 81 1
 -4 -23 0 5778 272 1
 4 -23 0 5703 243 1
 4 23 0 6096 267 1
 -4 23 0 5802 280 1
 -5 -23 0 13055 517 1
 -5 -23 0 12462 487 1
 5 -23 0 12534 517 1
 5 23 0 13158 503 1
 -5 23 0 13140 482 1
 -6 -23 0 8840 386 1
 -6 -23 0 8441 359 1
 6 -23 0 9019 385 1
 -6 23 0 9001 355 1
 6 23 0 9373 373 1
 7 -23 0 674 84 1
 -7 -23 0 553 71 1
 -7 -23 0 547 83 1
 7 23 0 591 71 1
 8 -23 0 1760 121 1
 -8 -23 0 1705 132 1
 -8 -23 0 1645 113 1
 -8 23 0 1696 115 1
 8 23 0 1649 111 1
 -9 -23 0 80 51 1
 9 -23 0 109 49 1
 -9 -23 0 184 54 1
 -9 23 0 197 48 1
 -10 -23 0 104 59 1
 10 -23 0 140 50 1
 -10 -23 0 32 47 1
 -10 23 0 0 42 1
 -11 -23 0 4 53 1
 -11 -23 0 17 45 1
 -11 23 0 0 44 1
 -12 -23 0 134 73 1
 -12 -23 0 157 52 1
 -12 23 0 138 56 1
 -13 -23 0 172 66 1
 -13 -23 0 172 80 1
 -13 23 0 242 66 1
 0 -24 0 21404 792 1
 0 24 0 20978 821 1
 1 -24 0 2827 136 1
 -1 -24 0 2751 143 1
 1 24 0 2471 154 1
 -1 24 0 2927 167 1
 2 -24 0 745 66 1
 -2 -24 0 761 77 1
 -2 24 0 1096 112 1
 2 24 0 901 90 1
 -3 -24 0 2279 140 1
 3 -24 0 2286 120 1
 3 24 0 2383 146 1
 -3 24 0 2453 159 1
 4 -24 0 3002 141 1
 -4 -24 0 2932 163 1
 -4 24 0 3063 179 1
 4 24 0 2865 161 1
 -5 -24 0 1401 106 1
 -5 -24 0 1382 117 1
 5 -24 0 1370 118 1
 -5 24 0 1289 86 1
 5 24 0 1465 107 1
 6 -24 0 739 90 1
 -6 -24 0 683 90 1
 -6 -24 0 566 76 1
 6 24 0 619 72 1
 -7 -24 0 2067 132 1
 -7 -24 0 2196 147 1
 7 -24 0 2459 145 1
 7 24 0 2212 129 1
 8 -24 0 283 65 1
 -8 -24 0 261 54 1
 -8 -24 0 208 64 1
 -8 24 0 284 56 1
 8 24 0 273 55 1
 -9 -24 0 1 37 1
 9 -24 0 102 50 1
 -9 -24 0 80 59 1
 -9 24 0 21 40 1
 -10 -24 0 114 66 1
 10 -24 0 23 48 1
 -10 -24 0 46 44 1
 -10 24 0 72 49 1
 -11 -24 0 222 74 1
 -11 -24 0 185 57 1
 -11 24 0 47 50 1
 -12 -24 0 68 64 1
 -12 -24 0 112 53 1
 -12 24 0 27 52 1
 -13 -24 0 453 101 1
 -13 24 0 791 96 1
 -1 -25 0 1230 90 1
 1 -25 0 1212 83 1
 1 25 0 1232 107 1
 -1 25 0 1369 127 1
 2 -25 0 5434 221 1
 -2 -25 0 4966 232 1
 -2 25 0 4908 254 1
 2 25 0 5270 249 1
 -3 -25 0 1148 94 1
 3 -25 0 1061 72 1
 -3 25 0 1040 111 1
 3 25 0 1111 103 1
 4 -25 0 3752 162 1
 -4 -25 0 3785 191 1
 -4 25 0 3550 197 1
 4 25 0 3436 184 1
 -5 -25 0 6479 268 1
 -5 -25 0 6392 285 1
 5 -25 0 6328 289 1
 -5 25 0 5734 250 1
 5 25 0 5917 272 1
 6 -25 0 872 98 1
 -6 -25 0 812 82 1
 -6 -25 0 657 86 1
 6 25 0 766 81 1
 7 -25 0 2769 157 1
 -7 -25 0 2663 145 1
 -7 -25 0 2379 157 1
 7 25 0 2572 145 1
 -8 -25 0 386 66 1
 8 -25 0 534 78 1
 -8 -25 0 408 79 1
 8 25 0 352 61 1
 -9 -25 0 991 97 1
 9 -25 0 1144 104 1
 -9 -25 0 743 93 1
 -9 25 0 1121 98 1
 10 -25 0 408 70 1
 -10 -25 0 329 71 1
 -10 -25 0 429 71 1
 -10 25 0 393 70 1
 -11 -25 0 56 51 1
 -11 -25 0 68 65 1
 -11 25 0 0 45 1
 -12 -25 0 688 89 1
 -12 -25 0 592 106 1
 -12 25 0 684 90 1
 -13 -25 0 316 87 1
 -13 -25 0 134 63 1
 -13 25 0 229 66 1
 0 -26 0 102 38 1
 0 26 0 219 64 1
 1 -26 0 12114 472 1
 -1 -26 0 12155 479 1
 1 26 0 12187 502 1
 -1 26 0 12127 507 1
 -2 -26 0 14335 563 1
 2 -26 0 13985 547 1
 -2 26 0 14729 591 1
 2 26 0 14672 580 1
 3 -26 0 1050 81 1
 -3 -26 0 1166 99 1
 -3 26 0 1285 114 1
 3 26 0 1473 111 1
 4 -26 0 2742 138 1
 -4 -26 0 2664 164 1
 -4 26 0 3197 183 1
 4 26 0 3264 170 1
 -5 -26 0 5608 249 1
 5 -26 0 5110 234 1
 -5 -26 0 5711 264 1
 5 -26 0 5777 271 1
 5 26 0 6030 259 1
 -6 -26 0 2070 139 1
 6 -26 0 1954 138 1
 -6 -26 0 1824 122 1
 6 26 0 1945 125 1
 -7 -26 0 248 58 1
 7 -26 0 182 57 1
 -7 -26 0 230 67 1
 7 26 0 245 56 1
 8 -26 0 1371 119 1
 -8 -26 0 1364 115 1
 -8 -26 0 1133 114 1
 8 26 0 995 98 1
 -9 -26 0 1644 133 1
 9 -26 0 1663 122 1
 -9 -26 0 1692 115 1
 -10 -26 0 1551 145 1
 10 -26 0 1335 117 1
 -10 -26 0 1271 117 1
 -10 26 0 1449 112 1
 -11 -26 0 811 108 1
 -11 -26 0 831 98 1
 -11 26 0 838 93 1
 -12 -26 0 121 58 1
 -12 -26 0 101 70 1
 -12 26 0 95 56 1
 -13 -26 0 221 89 1
 -13 -26 0 138 62 1
 -13 26 0 171 63 1
 1 -27 0 581 66 1
 -1 -27 0 657 73 1
 -1 27 0 744 99 1
 1 27 0 646 89 1
 -2 -27 0 5957 269 1
 2 -27 0 5767 253 1
 2 27 0 5901 281 1
 -2 27 0 6238 296 1
 3 -27 0 66 33 1
 -3 -27 0 74 44 1
 -3 27 0 17 43 1
 3 27 0 30 44 1
 4 -27 0 1166 80 1
 -4 -27 0 1469 110 1
 4 27 0 1206 110 1
 -4 27 0 1021 113 1
 5 -27 0 1779 131 1
 -5 -27 0 1651 124 1
 5 27 0 1435 112 1
 -6 -27 0 890 93 1
 -6 -27 0 968 108 1
 6 -27 0 965 103 1
 6 27 0 649 81 1
 -7 -27 0 1542 115 1
 7 -27 0 1514 122 1
 -7 -27 0 1503 127 1
 7 27 0 1555 115 1
 -8 -27 0 24 50 1
 8 -27 0 1 45 1
 -8 -27 0 24 42 1
 8 27 0 1 41 1
 -9 -27 0 725 92 1
 9 -27 0 784 89 1
 -9 -27 0 831 92 1
 -10 -27 0 312 73 1
 -10 -27 0 342 70 1
 10 -27 0 275 70 1
 -11 -27 0 732 106 1
 -11 -27 0 862 99 1
 -12 -27 0 182 84 1
 -12 -27 0 252 69 1
 -12 27 0 281 69 1
 0 -28 0 210 46 1
 0 28 0 62 48 1
 1 -28 0 1723 109 1
 -1 -28 0 1761 115 1
 -1 28 0 1539 131 1
 1 28 0 1582 130 1
 -2 -28 0 7999 340 1
 2 -28 0 8273 328 1
 -2 28 0 8358 370 1
 2 28 0 8110 356 1
 3 -28 0 870 70 1
 -3 -28 0 816 85 1
 -3 28 0 683 92 1
 3 28 0 734 88 1
 4 -28 0 193 40 1
 -4 -28 0 242 61 1
 4 28 0 218 54 1
 -4 28 0 130 54 1
 -5 -28 0 0 42 1
 5 -28 0 53 50 1
 5 28 0 20 44 1
 -6 -28 0 39 52 1
 6 -28 0 11 46 1
 -6 -28 0 29 42 1
 6 28 0 5 40 1
 7 -28 0 1479 116 1
 -7 -28 0 1197 112 1
 -7 -28 0 1383 104 1
 7 28 0 1272 104 1
 -8 -28 0 830 91 1
 8 -28 0 738 95 1
 -8 -28 0 983 116 1
 9 -28 0 652 87 1
 -9 -28 0 568 93 1
 -9 -28 0 539 77 1
 -10 -28 0 309 67 1
 10 -28 0 241 63 1
 -10 -28 0 197 74 1
 -11 -28 0 2371 173 1
 -12 -28 0 549 86 1
 -12 -28 0 642 104 1
 1 -29 0 10620 416 1
 -1 -29 0 10678 423 1
 1 29 0 10453 446 1
 -1 29 0 10755 455 1
 -2 -29 0 848 89 1
 2 -29 0 834 74 1
 2 29 0 863 102 1
 -2 29 0 762 104 1
 3 -29 0 3688 167 1
 -3 -29 0 3455 181 1
 3 29 0 3767 194 1
 -3 29 0 3736 206 1
 -4 -29 0 799 93 1
 -4 29 0 844 105 1
 4 29 0 670 86 1
 -5 -29 0 140 55 1
 5 -29 0 172 61 1
 5 29 0 143 52 1
 6 -29 0 379 74 1
 -6 -29 0 448 68 1
 -6 -29 0 209 61 1
 6 29 0 569 76 1
 -7 -29 0 4040 202 1
 7 -29 0 4133 219 1
 -7 -29 0 4137 220 1
 7 29 0 3911 205 1
 8 -29 0 126 56 1
 -8 -29 0 174 64 1
 -8 -29 0 89 46 1
 -9 -29 0 1561 143 1
 -9 -29 0 1467 117 1
 9 -29 0 1406 120 1
 10 -29 0 1400 118 1
 -10 -29 0 1701 140 1
 -10 -29 0 1362 123 1
 -11 -29 0 134 57 1
 -11 -29 0 91 64 1
 -12 -29 0 314 91 1
 -12 -29 0 215 68 1
 0 -30 0 3406 168 1
 0 30 0 3805 204 1
 1 -30 0 9845 386 1
 -1 -30 0 9349 389 1
 -1 30 0 9628 421 1
 1 30 0 9397 416 1
 2 -30 0 5683 250 1
 -2 -30 0 5952 265 1
 -2 30 0 5866 289 1
 2 30 0 5925 281 1
 3 -30 0 733 68 1
 -3 -30 0 884 91 1
 3 30 0 704 89 1
 -3 30 0 766 103 1
 -4 -30 0 299 65 1
 4 30 0 162 55 1
 -4 30 0 168 66 1
 -5 -30 0 737 88 1
 5 -30 0 962 110 1
 5 30 0 987 101 1
 -6 -30 0 292 65 1
 6 -30 0 252 70 1
 -6 -30 0 373 70 1
 6 30 0 478 77 1
 7 -30 0 465 80 1
 -7 -30 0 426 80 1
 -7 -30 0 466 74 1
 7 30 0 629 84 1
 -8 -30 0 195 62 1
 8 -30 0 257 66 1
 -8 -30 0 271 57 1
 -9 -30 0 4703 251 1
 9 -30 0 5591 265 1
 -9 -30 0 5645 274 1
 10 -30 0 2931 175 1
 -10 -30 0 2927 170 1
 -10 -30 0 2913 182 1
 -11 -30 0 169 62 1
 -11 -30 0 157 77 1
 -12 -30 0 39 75 1
 -12 -30 0 91 56 1
 -1 -31 0 1675 109 1
 1 -31 0 1494 104 1
 1 31 0 1597 142 1
 -1 31 0 1525 131 1
 -2 -31 0 4555 219 1
 2 -31 0 4605 205 1
 -2 31 0 4808 250 1
 2 31 0 4527 233 1
 -3 -31 0 319 66 1
 3 -31 0 342 52 1
 3 31 0 274 66 1
 -3 31 0 224 72 1
 -4 -31 0 1519 121 1
 -4 31 0 1642 153 1
 4 31 0 1542 123 1
 5 -31 0 3694 209 1
 -5 -31 0 3728 199 1
 5 31 0 3864 200 1
 -6 -31 0 901 102 1
 6 -31 0 993 111 1
 -6 -31 0 903 94 1
 6 31 0 941 100 1
 7 -31 0 363 77 1
 -7 -31 0 363 71 1
 -7 -31 0 339 77 1
 7 31 0 269 68 1
 -8 -31 0 2729 176 1
 -8 -31 0 2681 158 1
 8 -31 0 2793 172 1
 9 -31 0 9780 411 1
 -9 -31 0 9240 418 1
 -9 -31 0 9108 392 1
 -10 -31 0 554 83 1
 -10 -31 0 552 98 1
 10 -31 0 570 87 1
 -11 -31 0 104 72 1
 -11 -31 0 99 58 1
 -12 -31 0 559 101 1
 -12 -31 0 571 87 1
 0 -32 0 1127 93 1
 0 32 0 1161 124 1
 1 -32 0 144 44 1
 -1 -32 0 174 49 1
 -1 32 0 231 67 1
 1 32 0 153 64 1
 2 -32 0 1035 81 1
 -2 -32 0 722 85 1
 2 32 0 1049 112 1
 -2 32 0 928 111 1
 -3 -32 0 2203 139 1
 3 32 0 2380 151 1
 -3 32 0 2269 161 1
 -4 -32 0 4896 248 1
 4 32 0 5011 251 1
 -4 32 0 5183 270 1
 -5 -32 0 4871 236 1
 5 -32 0 4237 234 1
 5 32 0 4595 231 1
 -6 -32 0 578 76 1
 -6 -32 0 621 89 1
 6 -32 0 690 94 1
 6 32 0 592 83 1
 -7 -32 0 59 51 1
 7 -32 0 228 68 1
 -7 -32 0 230 68 1
 7 32 0 105 52 1
 -8 -32 0 1156 126 1
 -8 -32 0 1261 119 1
 8 -32 0 1370 131 1
 9 -32 0 1243 120 1
 -9 -32 0 1451 141 1
 -9 -32 0 1371 123 1
 10 -32 0 1448 124 1
 -10 -32 0 1370 124 1
 -10 -32 0 1435 144 1
 -11 -32 0 492 81 1
 -11 -32 0 325 86 1
 -12 -32 0 288 89 1
 -12 -32 0 390 80 1
 1 -33 0 3452 169 1
 -1 -33 0 3558 177 1
 1 33 0 3239 196 1
 -1 33 0 3102 194 1
 2 -33 0 1541 101 1
 -2 -33 0 1518 110 1
 -2 33 0 1524 136 1
 2 33 0 1403 126 1
 -3 -33 0 482 76 1
 -3 33 0 490 85 1
 3 33 0 434 78 1
 -4 -33 0 1101 106 1
 -4 33 0 1174 129 1
 4 33 0 1185 111 1
 5 -33 0 717 94 1
 -5 -33 0 812 97 1
 5 33 0 775 93 1
 -6 -33 0 963 99 1
 6 -33 0 629 91 1
 -6 -33 0 781 98 1
 6 33 0 779 92 1
 -7 -33 0 165 55 1
 -7 -33 0 174 64 1
 7 -33 0 212 67 1
 7 33 0 104 53 1
 -8 -33 0 359 81 1
 -8 -33 0 374 68 1
 8 -33 0 290 69 1
 9 -33 0 34 54 1
 -9 -33 0 1 61 1
 -9 -33 0 40 53 1
 10 -33 0 237 73 1
 -10 -33 0 121 59 1
 -10 -33 0 187 73 1
 -11 -33 0 979 103 1
 -11 -33 0 863 112 1
 0 -34 0 1912 117 1
 0 34 0 1967 141 1
 -1 -34 0 1010 93 1
 1 -34 0 1081 89 1
 1 34 0 1353 129 1
 -1 34 0 1344 131 1
 2 -34 0 1400 101 1
 -2 -34 0 1423 109 1
 2 34 0 1412 135 1
 -2 34 0 1436 142 1
 -3 -34 0 178 58 1
 3 34 0 249 65 1
 -3 34 0 303 73 1
 -4 -34 0 204 64 1
 4 34 0 180 62 1
 -4 34 0 295 78 1
 5 -34 0 193 68 1
 -5 -34 0 451 80 1
 -6 -34 0 201 64 1
 6 -34 0 204 68 1
 -6 -34 0 291 61 1
 6 34 0 280 64 1
 -7 -34 0 585 88 1
 -7 -34 0 432 71 1
 7 -34 0 415 75 1
 7 34 0 420 73 1
 -8 -34 0 29 48 1
 8 -34 0 76 58 1
 -8 -34 0 61 66 1
 -9 -34 0 2050 146 1
 -9 -34 0 2047 158 1
 9 -34 0 2030 149 1
 -10 -34 0 2018 158 1
 10 -34 0 2029 151 1
 -10 -34 0 1825 141 1
 -11 -34 0 0 50 1
 -11 -34 0 49 69 1
 1 -35 0 175 48 1
 -1 -35 0 275 56 1
 -1 35 0 369 76 1
 1 35 0 381 80 1
 -2 -35 0 145 54 1
 -2 35 0 156 63 1
 2 35 0 90 59 1
 -3 -35 0 579 81 1
 -3 35 0 645 101 1
 3 35 0 633 93 1
 -4 -35 0 917 100 1
 4 35 0 708 97 1
 -4 35 0 493 89 1
 -5 -35 0 3085 187 1
 5 -35 0 3406 199 1
 5 35 0 3402 190 1
 -6 -35 0 579 86 1
 6 -35 0 923 109 1
 -6 -35 0 651 86 1
 6 35 0 684 92 1
 -7 -35 0 1541 120 1
 -7 -35 0 1489 131 1
 7 -35 0 1586 133 1
 -8 -35 0 940 117 1
 8 -35 0 1024 112 1
 -8 -35 0 1064 107 1
 -9 -35 0 3960 230 1
 -9 -35 0 3946 212 1
 9 -35 0 4158 223 1
 -10 -35 0 22 54 1
 10 -35 0 11 57 1
 -10 -35 0 53 60 1
 -11 -35 0 60 59 1
 -11 -35 0 0 67 1
 0 -36 0 215 56 1
 0 36 0 189 69 1
 1 -36 0 1224 93 1
 -1 -36 0 1315 98 1
 1 36 0 1409 135 1
 -1 36 0 1096 117 1
 -2 -36 0 1174 99 1
 2 36 0 1195 120 1
 -2 36 0 1236 133 1
 -3 -36 0 589 83 1
 -3 36 0 897 114 1
 3 36 0 648 92 1
 -4 -36 0 311 73 1
 -4 36 0 263 71 1
 4 36 0 306 69 1
 5 -36 0 3516 207 1
 -5 -36 0 3425 197 1
 5 36 0 3352 195 1
 -6 -36 0 1559 119 1
 -6 -36 0 1587 129 1
 6 -36 0 1533 144 1
 6 36 0 1336 126 1
 -7 -36 0 844 99 1
 7 -36 0 1097 123 1
 -7 -36 0 1006 115 1
 7 36 0 1215 117 1
 -8 -36 0 312 81 1
 8 -36 0 305 76 1
 -8 -36 0 332 72 1
 9 -36 0 67 60 1
 -9 -36 0 23 53 1
 -9 -36 0 78 66 1
 -10 -36 0 1102 115 1
 -10 -36 0 952 123 1
 10 -36 0 1279 124 1
 -11 -36 0 237 86 1
 -1 -37 0 253 59 1
 -1 37 0 133 65 1
 1 37 0 187 70 1
 -2 -37 0 49 50 1
 2 37 0 76 54 1
 -2 37 0 84 58 1
 -3 -37 0 1356 124 1
 3 37 0 1378 135 1
 -3 37 0 1550 134 1
 -4 -37 0 0 53 1
 -4 37 0 46 59 1
 4 37 0 37 55 1
 -5 -37 0 1145 114 1
 5 -37 0 1143 122 1
 5 37 0 1198 117 1
 6 -37 0 163 68 1
 -6 -37 0 120 62 1
 -6 -37 0 115 56 1
 -7 -37 0 215 63 1
 7 -37 0 28 56 1
 -7 -37 0 120 66 1
 7 37 0 44 58 1
 -8 -37 0 204 75 1
 -8 -37 0 145 60 1
 8 -37 0 231 68 1
 -9 -37 0 273 78 1
 9 -37 0 234 70 1
 -9 -37 0 215 67 1
 10 -37 0 0 57 1
 -10 -37 0 34 66 1
 -10 -37 0 23 55 1
 0 -38 0 1229 100 1
 0 38 0 1110 120 1
 -1 -38 0 118 50 1
 -1 38 0 75 58 1
 1 38 0 173 69 1
 -2 -38 0 241 63 1
 2 38 0 169 61 1
 -2 38 0 271 79 1
 -3 -38 0 1308 122 1
 3 38 0 1294 133 1
 -3 38 0 1661 155 1
 -4 -38 0 266 70 1
 4 38 0 66 55 1
 -4 38 0 137 68 1
 5 -38 0 111 57 1
 -5 -38 0 181 64 1
 5 38 0 152 59 1
 -6 -38 0 251 66 1
 6 -38 0 250 76 1
 -6 -38 0 240 75 1
 6 38 0 168 65 1
 -7 -38 0 183 72 1
 -7 -38 0 187 61 1
 7 -38 0 238 67 1
 7 38 0 279 75 1
 -8 -38 0 1042 122 1
 8 -38 0 1197 125 1
 -8 -38 0 1133 114 1
 -9 -38 0 1049 122 1
 9 -38 0 1213 127 1
 -9 -38 0 1135 118 1
 -10 -38 0 305 87 1
 10 -38 0 221 75 1
 -10 -38 0 73 61 1
 -1 -39 0 2058 133 1
 -1 39 0 2115 152 1
 1 39 0 2002 153 1
 -2 -39 0 93 52 1
 2 39 0 20 50 1
 -2 39 0 34 59 1
 -3 -39 0 1782 132 1
 -3 39 0 2079 157 1
 3 39 0 1702 140 1
 -4 -39 0 151 65 1
 -4 39 0 169 74 1
 4 39 0 184 62 1
 -5 -39 0 365 80 1
 5 -39 0 231 69 1
 5 39 0 254 74 1
 -6 -39 0 72 57 1
 -6 -39 0 111 65 1
 6 -39 0 124 64 1
 6 39 0 38 52 1
 -7 -39 0 915 113 1
 7 -39 0 726 103 1
 -7 -39 0 869 103 1
 8 -39 0 16 60 1
 -8 -39 0 137 74 1
 -8 -39 0 28 52 1
 9 -39 0 0 54 1
 -9 -39 0 0 61 1
 -9 -39 0 49 54 1
 10 -39 0 40 67 1
 -10 -39 0 43 69 1
 0 40 0 6277 321 1
 -1 -40 0 8301 374 1
 1 40 0 9036 402 1
 -1 40 0 9004 407 1
 -2 -40 0 336 70 1
 2 40 0 359 81 1
 -2 40 0 324 80 1
 -3 -40 0 536 85 1
 -3 40 0 642 102 1
 3 40 0 650 99 1
 -4 -40 0 611 89 1
 -4 40 0 401 82 1
 4 40 0 485 83 1
 -5 -40 0 26 58 1
 5 -40 0 1 52 1
 5 40 0 127 62 1
 -6 -40 0 542 84 1
 6 -40 0 525 92 1
 -6 -40 0 533 88 1
 6 40 0 454 81 1
 7 -40 0 154 68 1
 -7 -40 0 286 77 1
 -7 -40 0 290 69 1
 7 40 0 264 74 1
 -8 -40 0 929 109 1
 -8 -40 0 968 120 1
 8 -40 0 1003 116 1
 -9 -40 0 112 76 1
 9 -40 0 161 69 1
 -9 -40 0 115 61 1
 -10 -40 0 78 75 1
 -10 -40 0 36 58 1
 10 -40 0 31 62 1
 -1 -41 0 4804 238 1
 1 41 0 4838 260 1
 -1 41 0 4894 267 1
 -2 -41 0 845 95 1
 2 41 0 612 97 1
 -2 41 0 699 106 1
 -3 -41 0 614 91 1
 -3 41 0 744 110 1
 3 41 0 830 109 1
 -4 -41 0 553 88 1
 -4 41 0 628 103 1
 4 41 0 777 103 1
 5 -41 0 215 75 1
 -5 -41 0 200 70 1
 5 41 0 229 71 1
 -6 -41 0 1396 134 1
 -6 -41 0 1458 131 1
 6 -41 0 1598 137 1
 6 41 0 1612 131 1
 7 -41 0 1348 136 1
 -7 -41 0 1148 115 1
 -7 -41 0 1286 127 1
 -8 -41 0 1017 123 1
 8 -41 0 1024 120 1
 -8 -41 0 1061 116 1
 -9 -41 0 91 63 1
 -9 -41 0 0 67 1
 9 -41 0 68 65 1
 0 42 0 3886 226 1
 -1 42 0 2244 163 1
 1 42 0 2323 162 1
 -2 -42 0 1898 140 1
 -2 42 0 1991 152 1
 2 42 0 2089 156 1
 -3 -42 0 684 96 1
 3 42 0 580 93 1
 -3 42 0 452 88 1
 -4 -42 0 1 55 1
 4 42 0 50 58 1
 -4 42 0 19 60 1
 -5 -42 0 153 68 1
 5 -42 0 186 77 1
 5 42 0 147 63 1
 -6 -42 0 1449 136 1
 -6 -42 0 1176 116 1
 6 -42 0 1405 138 1
 -7 -42 0 554 99 1
 -7 -42 0 593 89 1
 7 -42 0 487 93 1
 -8 -42 0 188 68 1
 -8 -42 0 222 77 1
 8 -42 0 329 77 1
 -9 -42 0 128 77 1
 9 -42 0 235 77 1
 -9 -42 0 230 71 1
 -1 43 0 1842 168 1
 1 43 0 1707 142 1
 -2 -43 0 155 61 1
 -2 43 0 208 75 1
 2 43 0 14 59 1
 -3 -43 0 895 106 1
 3 43 0 796 104 1
 -3 43 0 860 118 1
 -4 -43 0 701 95 1
 -4 43 0 589 95 1
 4 43 0 614 92 1
 5 -43 0 197 72 1
 -5 -43 0 179 69 1
 5 43 0 290 76 1
 -6 -43 0 1030 111 1
 -6 -43 0 1227 125 1
 6 -43 0 1198 129 1
 6 43 0 1174 126 1
 -7 -43 0 741 107 1
 7 -43 0 697 104 1
 -7 -43 0 643 93 1
 -8 -43 0 349 80 1
 -8 -43 0 425 94 1
 8 -43 0 447 88 1
 -9 -43 0 96 67 1
 9 -43 0 103 71 1
 -9 -43 0 77 76 1
 0 44 0 5498 280 1
 1 44 0 5082 268 1
 -2 -44 0 448 82 1
 -2 44 0 506 90 1
 2 44 0 526 98 1
 -3 -44 0 140 68 1
 3 44 0 162 62 1
 -3 44 0 163 67 1
 -4 -44 0 846 108 1
 -4 44 0 1046 128 1
 4 44 0 824 104 1
 5 -44 0 1188 129 1
 -5 -44 0 1120 121 1
 5 44 0 1340 138 1
 -6 -44 0 492 97 1
 6 -44 0 390 85 1
 -6 -44 0 327 76 1
 6 44 0 460 89 1
 7 -44 0 180 73 1
 -7 -44 0 155 78 1
 -7 -44 0 123 63 1
 -8 -44 0 122 78 1
 -8 -44 0 152 71 1
 8 -44 0 149 68 1
 -1 45 0 4364 248 1
 1 45 0 3961 231 1
 -2 45 0 403 86 1
 -3 -45 0 166 67 1
 3 45 0 137 70 1
 -3 45 0 146 71 1
 -4 -45 0 669 96 1
 -4 45 0 525 101 1
 5 -45 0 1567 152 1
 -5 -45 0 1681 144 1
 -6 -45 0 334 84 1
 -6 -45 0 340 78 1
 6 -45 0 398 81 1
 -7 -45 0 479 90 1
 7 -45 0 555 96 1
 -7 -45 0 603 105 1
 -8 -45 0 619 107 1
 8 -45 0 521 94 1
 -8 -45 0 670 97 1
 0 46 0 1291 139 1
 1 46 0 2041 158 1
 -1 46 0 1967 155 1
 2 46 0 324 83 1
 -2 46 0 305 84 1
 -3 -46 0 811 105 1
 -3 46 0 688 107 1
 3 46 0 728 110 1
 -4 -46 0 34 64 1
 -4 46 0 151 74 1
 4 46 0 64 69 1
 5 -46 0 1150 130 1
 -5 -46 0 1331 134 1
 5 46 0 1018 119 1
 6 -46 0 238 80 1
 -6 -46 0 113 73 1
 -6 -46 0 148 66 1
 7 -46 0 34 59 1
 -7 -46 0 0 54 1
 -7 -46 0 40 70 1
 1 47 0 3350 214 1
 -1 47 0 3105 208 1
 -2 47 0 69 61 1
 -3 47 0 1057 129 1
 3 47 0 1114 124 1
 -4 -47 0 523 91 1
 -4 47 0 685 116 1
 5 -47 0 323 79 1
 -5 -47 0 333 85 1
 6 -47 0 289 85 1
 -6 -47 0 294 84 1
 -6 -47 0 159 67 1
 7 -47 0 381 89 1
 -7 -47 0 323 78 1
 -7 -47 0 189 81 1
 1 48 0 267 81 1
 -1 48 0 237 80 1
 -2 48 0 9 65 1
 2 48 0 1 56 1
 3 48 0 1406 146 1
 -3 48 0 953 125 1
 -4 -48 0 1303 136 1
 4 -48 0 1296 137 1
 4 48 0 1110 131 1
 -4 48 0 1202 138 1
 -5 -48 0 0 67 1
 5 -48 0 28 64 1
 6 -48 0 164 76 1
 -6 -48 0 203 72 1
 -7 -48 0 1696 159 1
 7 -48 0 1518 150 1
 -7 -48 0 1454 137 1
 -1 49 0 242 75 1
 -2 49 0 0 65 1
 -3 49 0 4019 239 1
 4 -49 0 644 106 1
 4 49 0 659 108 1
 -4 49 0 896 136 1
 -5 -49 0 88 73 1
 5 -49 0 75 66 1
 5 49 0 17 67 1
 -6 -49 0 1070 119 1
 6 -49 0 1264 136 1
 6 49 0 1319 139 1
 0 50 0 992 116 1
 -1 50 0 165 66 1
 1 50 0 175 74 1
 -2 50 0 1629 146 1
 -3 50 0 4702 268 1
 4 -50 0 264 81 1
 4 50 0 179 79 1
 -4 50 0 222 79 1
 5 -50 0 78 68 1
 5 50 0 29 66 1
 -1 51 0 983 134 1
 -2 51 0 459 96 1
 3 51 0 1205 131 1
 -3 51 0 1122 128 1
 4 -51 0 2425 182 1
 -4 51 0 2657 195 1
 5 -51 0 71 69 1
 0 52 0 4 68 1
 -2 52 0 489 102 1
 -3 52 0 2057 191 1
 4 -52 0 2380 174 1
 -1 53 0 157 77 1
 -2 53 0 6 61 1
 3 53 0 3206 215 1
 -3 53 0 3437 222 1
 1 54 0 235 82 1
 -1 54 0 206 76 1
 -14 0 1 3961 205 1
 -14 0 1 3576 217 1
 -13 0 1 2342 135 1
 -13 0 1 2219 165 1
 -12 0 1 1437 110 1
 -12 0 1 1395 131 1
 -11 0 1 300 79 1
 -11 0 1 302 58 1
 -10 0 1 4165 209 1
 -10 0 1 3844 188 1
 -9 0 1 775 77 1
 -9 0 1 776 85 1
 -8 0 1 756 74 1
 -8 0 1 956 94 1
 8 0 -1 842 56 1
 -7 0 1 366 54 1
 7 0 -1 354 37 1
 -7 0 1 431 63 1
 -6 0 1 1979 102 1
 -6 0 1 1975 111 1
 6 0 -1 1928 86 1
 -5 0 1 1499 96 1
 -5 0 1 1424 83 1
 5 0 -1 1424 69 1
 -4 0 1 3534 153 1
 -4 0 1 3168 138 1
 4 0 -1 3480 126 1
 -3 0 1 375 50 1
 -3 0 1 471 45 1
 -2 0 1 475 47 1
 -2 0 1 500 40 1
 -2 0 -1 2931 87 1
 2 0 1 2847 91 1
 -3 0 -1 2939 127 1
 3 0 1 2839 128 1
 -3 0 -1 3073 134 1
 4 0 1 109 27 1
 -4 0 -1 90 28 1
 -4 0 -1 108 31 1
 -5 0 -1 775 61 1
 -5 0 -1 712 67 1
 5 0 1 723 55 1
 -6 0 -1 186 43 1
 6 0 1 166 34 1
 -6 0 -1 213 40 1
 -7 0 -1 823 67 1
 -7 0 -1 780 78 1
 7 0 1 764 65 1
 8 0 1 3292 152 1
 -8 0 -1 3391 173 1
 -8 0 -1 3281 159 1
 9 0 1 6056 244 1
 -9 0 -1 5514 264 1
 -9 0 -1 5734 251 1
 -10 0 -1 7362 310 1
 -10 0 -1 7675 333 1
 -11 0 -1 94 48 1
 -11 0 -1 131 58 1
 -12 0 -1 91 42 1
 -12 0 -1 105 58 1
 -13 0 -1 1755 125 1
 -13 0 -1 1935 151 1
 -14 0 -1 128 54 1
 -14 -1 1 1284 136 1
 -14 -1 1 1309 122 1
 -14 1 1 1547 124 1
 -14 1 1 1330 132 1
 -13 -1 1 483 69 1
 -13 -1 1 490 81 1
 -13 1 1 547 80 1
 -13 1 1 397 78 1
 -12 -1 1 360 70 1
 -12 -1 1 382 66 1
 -12 1 1 448 67 1
 -12 1 1 362 77 1
 -11 -1 1 68 53 1
 -11 -1 1 29 38 1
 -11 1 1 59 48 1
 -11 1 1 49 40 1
 -10 -1 1 91 40 1
 -10 -1 1 131 53 1
 -10 1 1 194 56 1
 -10 1 1 170 45 1
 -9 -1 1 2632 157 1
 -9 -1 1 2779 142 1
 -9 1 1 2671 155 1
 -9 1 1 2787 144 1
 -8 -1 1 1860 115 1
 8 -1 -1 2010 97 1
 -8 -1 1 1735 121 1
 8 1 -1 2047 96 1
 -8 1 1 1961 127 1
 -8 1 1 1617 109 1
 -7 -1 1 989 87 1
 7 -1 -1 964 58 1
 -7 -1 1 1093 79 1
 -7 1 1 891 72 1
 -7 1 1 865 87 1
 7 1 -1 1040 59 1
 -6 -1 1 3860 182 1
 -6 -1 1 3703 166 1
 6 -1 -1 3846 153 1
 -6 1 1 3894 168 1
 6 1 -1 3772 152 1
 -6 1 1 3679 180 1
 -5 -1 1 1088 80 1
 -5 -1 1 1070 71 1
 5 -1 -1 1068 54 1
 5 1 -1 808 50 1
 -5 1 1 854 74 1
 -5 1 1 850 67 1
 -4 -1 1 4281 174 1
 4 -1 -1 4345 162 1
 -4 -1 1 4314 187 1
 -4 1 1 4303 186 1
 -4 1 1 4034 171 1
 -3 -1 1 83 32 1
 -3 -1 1 127 29 1
 -3 1 1 94 33 1
 -3 1 1 85 27 1
 -2 -1 1 3664 139 1
 -2 -1 1 3630 149 1
 -2 1 1 3501 147 1
 -2 1 1 3450 137 1
 -2 -1 -1 19128 669 1
 -2 -1 -1 19104 639 1
 2 -1 1 19287 666 1
 2 1 1 20008 665 1
 -2 1 -1 20289 641 1
 3 -1 1 5444 230 1
 -3 -1 -1 5538 237 1
 -3 -1 -1 5471 224 1
 -3 1 -1 5607 225 1
 3 1 1 5487 229 1
 -4 -1 -1 2135 113 1
 -4 -1 -1 2144 104 1
 4 -1 1 2136 104 1
 -4 1 -1 2330 112 1
 4 1 1 2543 106 1
 -4 1 -1 2396 108 1
 -5 -1 -1 3289 156 1
 5 -1 1 3452 145 1
 -5 -1 -1 3343 145 1
 5 1 1 3675 145 1
 -5 1 -1 3453 147 1
 -5 1 -1 3344 154 1
 -6 -1 -1 5321 227 1
 -6 -1 -1 4826 211 1
 6 -1 1 4904 210 1
 -6 1 -1 5470 217 1
 -6 1 -1 5279 224 1
 6 1 1 5178 211 1
 7 -1 1 6454 262 1
 -7 -1 -1 6523 280 1
 -7 -1 -1 6893 268 1
 -7 1 -1 6393 277 1
 7 1 1 6660 263 1
 -7 1 -1 6457 265 1
 -8 -1 -1 2231 122 1
 -8 -1 -1 2217 133 1
 8 -1 1 2213 114 1
 -8 1 -1 2152 121 1
 8 1 1 2182 113 1
 -8 1 -1 2111 129 1
 -9 -1 -1 89 45 1
 -9 -1 -1 182 46 1
 9 -1 1 143 36 1
 9 1 1 98 33 1
 -9 1 -1 82 38 1
 -9 1 -1 180 49 1
 -10 -1 -1 472 73 1
 -10 -1 -1 538 68 1
 -10 1 -1 505 72 1
 -10 1 -1 422 58 1
 -11 -1 -1 5526 251 1
 -11 -1 -1 5953 276 1
 -11 1 -1 5975 272 1
 -11 1 -1 5596 252 1
 -12 -1 -1 179 53 1
 -12 -1 -1 129 61 1
 -12 1 -1 246 72 1
 -12 1 -1 151 48 1
 -13 -1 -1 177 55 1
 -13 -1 -1 292 69 1
 -13 1 -1 246 61 1
 -14 -1 -1 195 72 1
 -14 -1 -1 123 56 1
 -14 1 -1 258 66 1
 -14 -2 1 444 71 1
 -14 2 1 604 88 1
 -13 -2 1 259 76 1
 -13 -2 1 205 62 1
 -13 2 1 210 66 1
 -13 2 1 135 58 1
 -12 -2 1 444 81 1
 -12 -2 1 512 71 1
 -12 2 1 502 84 1
 -12 2 1 515 72 1
 -11 -2 1 43 48 1
 -11 -2 1 57 39 1
 -11 2 1 12 46 1
 -11 2 1 13 39 1
 -10 -2 1 0 34 1
 -10 -2 1 4 44 1
 -10 2 1 33 38 1
 -10 2 1 52 46 1
 -9 -2 1 43 37 1
 -9 -2 1 142 50 1
 -9 2 1 155 50 1
 -9 2 1 136 39 1
 8 -2 -1 369 38 1
 -8 -2 1 164 55 1
 -8 -2 1 264 50 1
 -8 2 1 259 54 1
 8 2 -1 295 35 1
 -8 2 1 192 42 1
 7 -2 -1 156 29 1
 -7 -2 1 157 46 1
 -7 -2 1 127 38 1
 -7 2 1 129 40 1
 7 2 -1 115 27 1
 -7 2 1 128 44 1
 -6 -2 1 4237 183 1
 6 -2 -1 4068 167 1
 -6 -2 1 3999 195 1
 -6 2 1 4048 192 1
 6 2 -1 4356 165 1
 -6 2 1 4413 183 1
 -5 -2 1 198 45 1
 -5 -2 1 211 38 1
 5 -2 -1 200 26 1
 -5 2 1 174 34 1
 5 2 -1 219 26 1
 -5 2 1 216 43 1
 -4 -2 1 3338 150 1
 -4 -2 1 3332 162 1
 4 -2 -1 3255 140 1
 -4 2 1 4069 167 1
 -4 2 1 3752 152 1
 -3 -2 1 2386 101 1
 -3 -2 1 1916 86 1
 -3 2 1 2086 96 1
 -3 2 1 1894 85 1
 -2 -2 1 1071 67 1
 -2 -2 1 1067 62 1
 -2 2 1 1159 68 1
 -2 2 1 1143 61 1
 -2 -2 -1 1078 58 1
 2 -2 1 1087 55 1
 -2 -2 -1 1085 51 1
 2 2 1 938 51 1
 -2 2 -1 1006 52 1
 -3 -2 -1 6628 264 1
 3 -2 1 6220 256 1
 -3 -2 -1 6491 248 1
 -3 2 -1 5941 246 1
 3 2 1 6312 254 1
 -4 -2 -1 3022 138 1
 -4 -2 -1 2822 145 1
 4 -2 1 2819 136 1
 -4 2 -1 3060 137 1
 4 2 1 3083 136 1
 -5 -2 -1 1545 94 1
 -5 -2 -1 1647 88 1
 5 -2 1 1711 84 1
 -5 2 -1 1552 89 1
 -5 2 -1 1665 89 1
 5 2 1 1548 81 1
 6 -2 1 8282 304 1
 -6 -2 -1 7805 318 1
 -6 -2 -1 8161 303 1
 -6 2 -1 7407 313 1
 6 2 1 7491 301 1
 -6 2 -1 7154 299 1
 -7 -2 -1 12589 467 1
 7 -2 1 12581 472 1
 -7 -2 -1 12612 491 1
 -7 2 -1 12615 468 1
 -7 2 -1 12844 489 1
 7 2 1 12600 471 1
 8 -2 1 721 61 1
 -8 -2 -1 803 73 1
 -8 -2 -1 636 74 1
 8 2 1 817 61 1
 -8 2 -1 892 78 1
 -8 2 -1 672 74 1
 -9 -2 -1 1219 89 1
 -9 -2 -1 1229 104 1
 9 -2 1 1221 79 1
 9 2 1 1184 76 1
 -9 2 -1 1061 93 1
 -9 2 -1 1149 98 1
 -10 -2 -1 1243 108 1
 -10 -2 -1 1164 94 1
 -10 2 -1 1108 92 1
 -10 2 -1 1311 103 1
 -11 -2 -1 3876 188 1
 -11 -2 -1 3867 207 1
 -11 2 -1 3664 185 1
 -11 2 -1 3722 199 1
 -12 -2 -1 210 64 1
 -12 -2 -1 224 57 1
 -12 2 -1 288 73 1
 -12 2 -1 278 59 1
 -13 -2 -1 218 72 1
 -13 -2 -1 261 64 1
 -13 2 -1 224 62 1
 -14 -2 -1 616 88 1
 -14 2 -1 449 71 1
 -14 -3 1 3126 181 1
 -14 -3 1 2896 189 1
 -14 3 1 3302 178 1
 -14 3 1 2828 187 1
 -13 -3 1 362 81 1
 -13 -3 1 404 72 1
 -13 3 1 321 65 1
 -13 3 1 355 75 1
 -12 -3 1 53 60 1
 -12 -3 1 80 44 1
 -12 3 1 26 44 1
 -12 3 1 31 51 1
 -11 -3 1 86 54 1
 -11 -3 1 71 38 1
 -11 3 1 35 48 1
 -11 3 1 3 37 1
 -10 -3 1 18 45 1
 -10 -3 1 130 45 1
 -10 3 1 53 36 1
 -10 3 1 141 52 1
 -9 -3 1 1633 105 1
 -9 -3 1 1792 123 1
 -9 3 1 1862 121 1
 -9 3 1 1883 112 1
 -8 -3 1 112 40 1
 -8 -3 1 110 50 1
 8 -3 -1 131 28 1
 -8 3 1 26 32 1
 8 3 -1 63 25 1
 -8 3 1 93 45 1
 -7 -3 1 330 51 1
 7 -3 -1 464 44 1
 -7 -3 1 407 64 1
 -7 3 1 340 58 1
 7 3 -1 308 36 1
 -7 3 1 337 52 1
 6 -3 -1 4777 189 1
 -6 -3 1 4749 218 1
 -6 -3 1 4903 203 1
 6 3 -1 4702 185 1
 -6 3 1 4773 214 1
 -6 3 1 4656 200 1
 -5 -3 1 170 34 1
 -5 -3 1 160 38 1
 5 -3 -1 106 22 1
 -5 3 1 130 35 1
 5 3 -1 120 21 1
 -5 3 1 151 30 1
 4 -3 -1 4561 187 1
 -4 -3 1 4532 195 1
 -4 -3 1 5004 212 1
 4 3 -1 4733 184 1
 -4 3 1 5031 196 1
 -4 3 1 4962 208 1
 -3 -3 1 14602 478 1
 3 -3 -1 13858 488 1
 -3 -3 1 14105 501 1
 -3 3 1 14039 475 1
 -3 3 1 13887 499 1
 -2 -3 1 6742 262 1
 -2 -3 1 6842 277 1
 -2 3 1 6560 259 1
 -2 3 1 6580 274 1
 1 -3 1 4956 179 1
 -1 -3 -1 4795 181 1
 -1 3 -1 4949 170 1
 1 3 1 4613 176 1
 2 -3 1 1036 55 1
 -2 -3 -1 1174 51 1
 -2 -3 -1 1146 59 1
 -2 3 -1 916 50 1
 2 3 1 945 50 1
 -3 -3 -1 1849 88 1
 -3 -3 -1 1812 98 1
 3 -3 1 1737 90 1
 -3 3 -1 2213 93 1
 -3 3 -1 1998 90 1
 3 3 1 2106 90 1
 -4 -3 -1 781 70 1
 4 -3 1 754 54 1
 -4 -3 -1 668 55 1
 4 3 1 608 49 1
 -4 3 -1 612 56 1
 -5 -3 -1 699 68 1
 -5 -3 -1 701 54 1
 5 -3 1 611 52 1
 -5 3 -1 499 52 1
 5 3 1 557 50 1
 6 -3 1 1376 85 1
 -6 -3 -1 1476 93 1
 -6 -3 -1 1712 105 1
 -6 3 -1 1504 93 1
 -6 3 -1 1459 97 1
 6 3 1 1388 85 1
 -7 -3 -1 6811 285 1
 7 -3 1 7027 286 1
 -7 -3 -1 7036 304 1
 7 3 1 7112 283 1
 -7 3 -1 7476 289 1
 -7 3 -1 7293 298 1
 -8 -3 -1 2172 140 1
 8 -3 1 2457 124 1
 -8 -3 -1 2476 131 1
 -8 3 -1 2832 137 1
 8 3 1 2490 122 1
 -8 3 -1 2783 143 1
 -9 -3 -1 859 90 1
 -9 -3 -1 845 77 1
 9 -3 1 782 65 1
 9 3 1 749 65 1
 -9 3 -1 1003 90 1
 -9 3 -1 827 77 1
 -10 -3 -1 5304 255 1
 -10 -3 -1 4876 232 1
 -10 3 -1 5504 240 1
 -10 3 -1 5537 254 1
 -11 -3 -1 8900 390 1
 -11 -3 -1 8588 367 1
 -11 3 -1 9729 390 1
 -11 3 -1 9377 370 1
 -12 -3 -1 139 64 1
 -12 -3 -1 186 56 1
 -12 3 -1 117 57 1
 -12 3 -1 78 47 1
 -13 -3 -1 821 90 1
 -13 -3 -1 922 109 1
 -13 3 -1 766 97 1
 -13 3 -1 833 85 1
 -14 -3 -1 570 76 1
 -14 3 -1 474 83 1
 -14 -4 1 3638 217 1
 -14 -4 1 3886 203 1
 -14 4 1 3950 199 1
 -13 -4 1 251 57 1
 -13 -4 1 283 79 1
 -13 4 1 373 63 1
 -13 4 1 280 72 1
 -12 -4 1 219 51 1
 -12 -4 1 204 66 1
 -12 4 1 200 55 1
 -12 4 1 229 66 1
 -11 -4 1 162 44 1
 -11 -4 1 139 63 1
 -11 4 1 111 50 1
 -11 4 1 144 45 1
 -10 -4 1 241 59 1
 -10 -4 1 143 43 1
 -10 4 1 196 49 1
 -10 4 1 178 53 1
 -9 -4 1 37 43 1
 -9 -4 1 70 40 1
 -9 4 1 101 45 1
 -9 4 1 61 35 1
 -8 -4 1 240 46 1
 8 -4 -1 348 39 1
 -8 -4 1 242 56 1
 -8 4 1 308 49 1
 -8 4 1 279 55 1
 8 4 -1 240 33 1
 -7 -4 1 1222 101 1
 -7 -4 1 1372 90 1
 7 -4 -1 1355 75 1
 -7 4 1 1356 89 1
 7 4 -1 1405 72 1
 -7 4 1 1474 101 1
 -6 -4 1 1065 87 1
 -6 -4 1 1162 75 1
 6 -4 -1 1210 65 1
 6 4 -1 1073 58 1
 -6 4 1 1368 88 1
 -6 4 1 1284 79 1
 5 -4 -1 4381 181 1
 -5 -4 1 4640 208 1
 -5 -4 1 4548 191 1
 5 4 -1 4645 177 1
 -5 4 1 4702 192 1
 -5 4 1 4602 202 1
 -4 -4 1 11937 443 1
 -4 -4 1 12294 468 1
 4 -4 -1 11705 445 1
 -4 4 1 11892 462 1
 -4 4 1 12033 441 1
 4 4 -1 11400 439 1
 3 -4 -1 24938 858 1
 -3 -4 1 24768 875 1
 -3 -4 1 24555 835 1
 -3 4 1 24226 870 1
 -3 4 1 24070 832 1
 -2 -4 1 4625 182 1
 -2 -4 1 4486 192 1
 -2 4 1 4409 190 1
 -2 4 1 4667 178 1
 -1 4 1 244 25 1
 1 -4 1 9013 299 1
 -1 -4 -1 9006 301 1
 1 4 1 9035 297 1
 -2 -4 -1 2333 116 1
 2 -4 1 2226 112 1
 -2 -4 -1 2449 104 1
 -2 4 -1 2244 106 1
 2 4 1 2275 108 1
 -3 -4 -1 1156 78 1
 3 -4 1 999 66 1
 -3 -4 -1 960 61 1
 -3 4 -1 898 63 1
 -3 4 -1 898 64 1
 3 4 1 867 62 1
 -4 -4 -1 59 25 1
 4 -4 1 63 27 1
 -4 -4 -1 59 33 1
 -4 4 -1 111 29 1
 -4 4 -1 119 31 1
 4 4 1 131 29 1
 -5 -4 -1 1158 87 1
 -5 -4 -1 1250 78 1
 5 -4 1 1158 73 1
 -5 4 -1 1159 77 1
 5 4 1 1244 73 1
 -6 -4 -1 9092 366 1
 6 -4 1 9131 350 1
 -6 -4 -1 9010 345 1
 6 4 1 9222 347 1
 -6 4 -1 9076 345 1
 -7 -4 -1 1322 92 1
 7 -4 1 1263 79 1
 -7 -4 -1 1293 83 1
 -7 4 -1 1305 90 1
 7 4 1 1141 75 1
 -7 4 -1 1119 81 1
 -8 -4 -1 1352 102 1
 -8 -4 -1 1397 91 1
 8 -4 1 1106 79 1
 -8 4 -1 1062 88 1
 -8 4 -1 1103 87 1
 8 4 1 1329 79 1
 -9 -4 -1 1343 104 1
 9 -4 1 1335 83 1
 -9 -4 -1 1459 94 1
 9 4 1 1312 80 1
 -9 4 -1 1166 90 1
 -9 4 -1 1279 96 1
 -10 -4 -1 4527 214 1
 -10 -4 -1 5108 245 1
 -10 4 -1 5007 218 1
 -10 4 -1 5159 234 1
 -11 -4 -1 795 83 1
 -11 -4 -1 717 90 1
 -11 4 -1 741 89 1
 -12 -4 -1 259 70 1
 -12 -4 -1 253 57 1
 -12 4 -1 330 69 1
 -12 4 -1 240 59 1
 -13 -4 -1 1928 125 1
 -13 4 -1 2060 132 1
 -14 -4 -1 185 61 1
 -14 4 -1 199 60 1
 -14 -5 1 1783 134 1
 -14 5 1 1825 143 1
 -14 5 1 1875 133 1
 -13 -5 1 114 53 1
 -13 -5 1 146 66 1
 -13 5 1 70 44 1
 -13 5 1 121 60 1
 -12 -5 1 221 55 1
 -12 -5 1 223 66 1
 -12 5 1 271 59 1
 -12 5 1 259 65 1
 -11 -5 1 547 70 1
 -11 -5 1 428 75 1
 -11 5 1 563 77 1
 -11 5 1 563 69 1
 -10 -5 1 56 51 1
 -10 -5 1 34 36 1
 -10 5 1 59 40 1
 -10 5 1 9 42 1
 -9 -5 1 740 75 1
 -9 -5 1 592 77 1
 -9 5 1 613 75 1
 -9 5 1 746 74 1
 -8 -5 1 2096 118 1
 -8 -5 1 2032 132 1
 8 -5 -1 2348 103 1
 -8 5 1 2287 128 1
 -8 5 1 2145 117 1
 8 5 -1 2086 98 1
 -7 -5 1 1411 93 1
 -7 -5 1 1219 103 1
 7 -5 -1 1432 79 1
 -7 5 1 1453 102 1
 7 5 -1 1463 74 1
 -7 5 1 1377 94 1
 -6 -5 1 36 31 1
 6 -5 -1 16 22 1
 -6 -5 1 41 34 1
 6 5 -1 4 18 1
 -6 5 1 76 34 1
 -6 5 1 52 32 1
 5 -5 -1 9174 339 1
 -5 -5 1 9234 343 1
 -5 -5 1 9190 365 1
 5 5 -1 8363 332 1
 -5 5 1 8603 339 1
 -5 5 1 8680 356 1
 -4 -5 1 31490 1200 1
 -4 -5 1 32545 1148 1
 4 -5 -1 31975 1180 1
 4 5 -1 31622 1172 1
 -4 5 1 32474 1196 1
 -4 5 1 32301 1145 1
 -3 -5 1 256 42 1
 -3 -5 1 336 54 1
 3 -5 -1 382 44 1
 -2 -5 1 1460 80 1
 -2 -5 1 1446 74 1
 -2 5 1 1464 76 1
 -2 5 1 1504 69 1
 -2 5 1 1584 76 1
 -1 -5 1 1584 65 1
 -1 5 1 1582 65 1
 -1 5 1 1539 67 1
 0 -5 -1 603 32 1
 0 5 1 681 35 1
 -1 -5 -1 241 32 1
 1 -5 1 196 31 1
 1 5 1 222 27 1
 2 -5 1 20093 692 1
 -2 -5 -1 20263 695 1
 -2 -5 -1 20148 659 1
 -2 5 -1 20373 664 1
 2 5 1 20308 688 1
 -3 -5 -1 8803 316 1
 -3 -5 -1 8670 338 1
 3 -5 1 8462 331 1
 -3 5 -1 8464 323 1
 -3 5 -1 8526 319 1
 3 5 1 8478 325 1
 -4 -5 -1 42 27 1
 4 -5 1 79 28 1
 -4 -5 -1 75 33 1
 4 5 1 40 24 1
 -4 5 -1 72 27 1
 -4 5 -1 13 24 1
 5 -5 1 796 59 1
 -5 -5 -1 804 73 1
 -5 -5 -1 783 58 1
 -5 5 -1 549 59 1
 -5 5 -1 426 54 1
 5 5 1 512 49 1
 6 -5 1 31821 1165 1
 -6 -5 -1 32158 1182 1
 -6 -5 -1 32429 1129 1
 -6 5 -1 32276 1130 1
 6 5 1 32526 1161 1
 -7 -5 -1 2520 134 1
 -7 -5 -1 2658 151 1
 7 -5 1 2686 133 1
 7 5 1 3021 132 1
 -7 5 -1 3153 142 1
 8 -5 1 1534 87 1
 -8 -5 -1 1451 105 1
 -8 -5 -1 1439 89 1
 -8 5 -1 1326 89 1
 8 5 1 1395 81 1
 -8 5 -1 1277 91 1
 -9 -5 -1 1312 91 1
 -9 -5 -1 1298 105 1
 9 -5 1 1361 85 1
 9 5 1 1353 82 1
 -9 5 -1 1472 94 1
 -9 5 -1 1463 101 1
 -10 -5 -1 815 95 1
 -10 -5 -1 792 82 1
 -10 5 -1 729 79 1
 -10 5 -1 755 86 1
 -11 -5 -1 1070 115 1
 -11 -5 -1 1003 96 1
 -11 5 -1 1054 100 1
 -11 5 -1 961 95 1
 -12 -5 -1 126 44 1
 -12 -5 -1 30 53 1
 -12 5 -1 136 60 1
 -12 5 -1 73 49 1
 -13 -5 -1 796 107 1
 -13 -5 -1 759 90 1
 -13 5 -1 670 84 1
 -14 -5 -1 0 40 1
 -14 5 -1 49 51 1
 -14 -6 1 25 50 1
 -14 6 1 135 57 1
 -13 -6 1 977 102 1
 -13 -6 1 1167 123 1
 -13 6 1 1052 101 1
 -13 6 1 880 102 1
 -12 -6 1 585 93 1
 -12 -6 1 486 76 1
 -12 6 1 529 85 1
 -12 6 1 691 82 1
 -11 -6 1 344 72 1
 -11 -6 1 424 65 1
 -11 6 1 332 60 1
 -11 6 1 339 64 1
 -10 -6 1 542 82 1
 -10 -6 1 437 66 1
 -10 6 1 416 63 1
 -10 6 1 357 65 1
 -9 -6 1 71 46 1
 -9 -6 1 37 33 1
 -9 6 1 104 43 1
 -9 6 1 88 41 1
 -8 -6 1 792 92 1
 -8 -6 1 683 76 1
 8 -6 -1 818 60 1
 -8 6 1 771 81 1
 -8 6 1 748 74 1
 8 6 -1 674 57 1
 -7 -6 1 507 60 1
 -7 -6 1 511 66 1
 7 -6 -1 549 50 1
 -7 6 1 431 55 1
 7 6 -1 514 43 1
 -7 6 1 627 69 1
 6 -6 -1 1735 84 1
 -6 -6 1 1642 108 1
 -6 -6 1 1701 94 1
 -6 6 1 1455 99 1
 6 6 -1 1489 76 1
 -6 6 1 1533 93 1
 5 -6 -1 2460 114 1
 -5 -6 1 2533 136 1
 -5 -6 1 2646 123 1
 5 6 -1 2689 108 1
 -5 6 1 2635 130 1
 -4 -6 1 24477 872 1
 -4 -6 1 24597 832 1
 4 -6 -1 23757 852 1
 -4 6 1 23821 864 1
 4 6 -1 23101 844 1
 -4 6 1 22605 826 1
 -3 -6 1 12816 434 1
 3 -6 -1 12201 444 1
 -3 -6 1 11764 454 1
 -3 6 1 11411 448 1
 3 6 -1 11483 434 1
 -3 6 1 11586 428 1
 -2 -6 1 1243 66 1
 -2 6 1 1325 65 1
 -2 6 1 1294 58 1
 -1 -6 1 428 32 1
 -1 6 1 397 37 1
 -1 6 1 356 24 1
 -1 6 1 405 32 1
 0 -6 -1 2432 110 1
 0 6 1 2296 109 1
 0 6 -1 2421 112 1
 -1 -6 -1 116 30 1
 1 -6 1 43 25 1
 1 6 1 73 26 1
 -2 -6 -1 2375 107 1
 2 -6 1 2297 104 1
 -2 -6 -1 2256 92 1
 2 6 1 2250 99 1
 -2 6 -1 2396 99 1
 -3 -6 -1 4303 173 1
 -3 -6 -1 4289 189 1
 3 -6 1 4309 184 1
 -3 6 -1 4343 174 1
 3 6 1 4078 177 1
 -3 6 -1 4307 176 1
 -4 -6 -1 3104 148 1
 -4 -6 -1 3085 165 1
 4 -6 1 2908 153 1
 -4 6 -1 4150 159 1
 -4 6 -1 3992 157 1
 4 6 1 3816 153 1
 -5 -6 -1 319 52 1
 5 -6 1 459 51 1
 -5 -6 -1 521 55 1
 -5 6 -1 353 47 1
 5 6 1 420 47 1
 -5 6 -1 265 43 1
 -6 -6 -1 19958 727 1
 6 -6 1 20003 749 1
 -6 -6 -1 20281 766 1
 -6 6 -1 20161 752 1
 -6 6 -1 20142 728 1
 6 6 1 20141 743 1
 -7 -6 -1 16110 634 1
 7 -6 1 16801 615 1
 -7 -6 -1 16599 601 1
 -7 6 -1 15626 599 1
 7 6 1 15711 608 1
 -8 -6 -1 87 39 1
 8 -6 1 81 31 1
 -8 -6 -1 40 44 1
 -8 6 -1 120 38 1
 8 6 1 124 32 1
 -8 6 -1 0 20 1
 -9 -6 -1 600 81 1
 9 -6 1 739 69 1
 -9 -6 -1 757 77 1
 -9 6 -1 833 82 1
 -9 6 -1 873 84 1
 9 6 1 804 65 1
 -10 -6 -1 1638 113 1
 -10 -6 -1 1943 132 1
 -10 6 -1 1804 115 1
 -10 6 -1 1655 119 1
 -11 -6 -1 5724 257 1
 -11 -6 -1 6370 286 1
 -11 6 -1 6080 275 1
 -11 6 -1 5742 253 1
 -12 -6 -1 34 53 1
 -12 -6 -1 21 38 1
 -12 6 -1 0 41 1
 -13 -6 -1 72 50 1
 -13 6 -1 63 48 1
 -14 -6 -1 96 57 1
 -14 6 -1 61 55 1
 -14 -7 1 872 99 1
 -14 7 1 794 88 1
 -13 -7 1 895 91 1
 -13 -7 1 846 107 1
 -13 7 1 938 98 1
 -13 7 1 917 106 1
 -12 -7 1 2079 147 1
 -12 -7 1 1990 129 1
 -12 7 1 1990 128 1
 -12 7 1 1797 139 1
 -11 -7 1 1 38 1
 -11 -7 1 1 49 1
 -11 7 1 5 43 1
 -11 7 1 10 39 1
 -10 -7 1 377 64 1
 -10 -7 1 348 58 1
 -10 7 1 318 56 1
 -10 7 1 250 59 1
 -9 -7 1 187 50 1
 -9 -7 1 172 56 1
 -9 7 1 207 52 1
 -9 7 1 150 42 1
 -8 -7 1 500 76 1
 8 -7 -1 597 54 1
 -8 -7 1 498 61 1
 -8 7 1 567 64 1
 -8 7 1 577 72 1
 -7 -7 1 4335 217 1
 7 -7 -1 4748 194 1
 -7 -7 1 4318 200 1
 7 7 -1 4925 187 1
 -7 7 1 4649 213 1
 -7 7 1 4703 203 1
 6 -7 -1 5203 219 1
 -6 -7 1 5325 226 1
 -6 -7 1 5336 244 1
 6 7 -1 5845 215 1
 -6 7 1 5533 237 1
 -6 7 1 5814 228 1
 5 -7 -1 540 48 1
 -5 -7 1 534 65 1
 -5 -7 1 494 54 1
 -5 7 1 339 52 1
 -5 7 1 375 51 1
 5 7 -1 328 37 1
 -4 -7 1 15637 590 1
 -4 -7 1 16197 622 1
 4 -7 -1 16326 606 1
 4 7 -1 16605 598 1
 -4 7 1 16554 589 1
 -4 7 1 16901 616 1
 -3 -7 1 14482 534 1
 -3 -7 1 14417 508 1
 -3 7 1 14578 526 1
 -3 7 1 14978 506 1
 3 7 -1 14686 517 1
 -3 7 1 15219 530 1
 -2 -7 1 7286 312 1
 -2 7 1 7462 309 1
 -2 7 1 7414 294 1
 2 7 -1 6999 304 1
 -1 -7 1 102 25 1
 1 7 -1 134 29 1
 -1 7 1 125 26 1
 -1 7 1 169 35 1
 0 -7 -1 5617 239 1
 0 7 1 6158 242 1
 0 7 -1 5691 240 1
 1 -7 1 6248 253 1
 -1 -7 -1 6111 253 1
 1 7 1 6055 248 1
 -2 -7 -1 978 50 1
 2 -7 1 961 57 1
 -2 -7 -1 1007 64 1
 -2 7 -1 777 53 1
 2 7 1 706 52 1
 -3 -7 -1 2773 128 1
 -3 -7 -1 2497 110 1
 3 -7 1 2635 121 1
 -3 7 -1 2589 108 1
 -3 7 -1 2611 114 1
 3 7 1 2730 116 1
 4 -7 1 9421 352 1
 -4 -7 -1 9039 336 1
 -4 -7 -1 9224 361 1
 -4 7 -1 8511 343 1
 4 7 1 8385 343 1
 -4 7 -1 8173 337 1
 5 -7 1 663 56 1
 -5 -7 -1 623 70 1
 -5 -7 -1 717 63 1
 -5 7 -1 510 53 1
 -5 7 -1 597 56 1
 5 7 1 562 52 1
 6 -7 1 1235 80 1
 -6 -7 -1 1260 81 1
 -6 -7 -1 1164 94 1
 -6 7 -1 1388 83 1
 -6 7 -1 1233 79 1
 6 7 1 1173 74 1
 -7 -7 -1 21871 817 1
 -7 -7 -1 21870 775 1
 7 -7 1 21502 795 1
 7 7 1 21788 789 1
 -7 7 -1 21502 801 1
 -7 7 -1 21537 775 1
 8 -7 1 440 53 1
 -8 -7 -1 446 72 1
 -8 -7 -1 461 61 1
 -8 7 -1 313 51 1
 8 7 1 448 50 1
 9 -7 1 2525 133 1
 -9 -7 -1 2537 158 1
 -9 -7 -1 2679 144 1
 9 7 1 2620 129 1
 -9 7 -1 2532 139 1
 -10 -7 -1 2265 128 1
 10 -7 1 2156 122 1
 -10 -7 -1 1928 141 1
 -10 7 -1 2238 127 1
 -11 -7 -1 1674 119 1
 -11 -7 -1 1735 139 1
 -11 7 -1 2051 132 1
 -11 7 -1 1886 117 1
 -12 -7 -1 150 66 1
 -12 -7 -1 188 56 1
 -12 7 -1 177 56 1
 -13 -7 -1 139 71 1
 -13 -7 -1 58 47 1
 -13 7 -1 79 51 1
 -14 -7 -1 14 42 1
 -14 7 -1 37 51 1
 -14 -8 1 726 91 1
 -14 -8 1 684 103 1
 -14 8 1 811 93 1
 -13 -8 1 139 71 1
 -13 -8 1 251 63 1
 -13 8 1 228 70 1
 -13 8 1 83 50 1
 -12 -8 1 536 86 1
 -12 -8 1 509 68 1
 -12 8 1 556 73 1
 -12 8 1 553 84 1
 -11 -8 1 202 62 1
 -11 -8 1 153 51 1
 -11 8 1 212 54 1
 -11 8 1 191 57 1
 -10 -8 1 6626 287 1
 -10 -8 1 6826 310 1
 -10 8 1 6916 299 1
 -10 8 1 6884 284 1
 -9 -8 1 4337 203 1
 -9 -8 1 4556 224 1
 -9 8 1 4272 199 1
 -9 8 1 4572 212 1
 -8 -8 1 1833 113 1
 -8 -8 1 1908 128 1
 8 -8 -1 1901 100 1
 -8 8 1 1740 108 1
 -8 8 1 1895 119 1
 -7 -8 1 1354 104 1
 7 -8 -1 1459 81 1
 -7 -8 1 1344 88 1
 -7 8 1 1375 97 1
 7 8 -1 1254 73 1
 -7 8 1 1309 90 1
 6 -8 -1 3722 165 1
 -6 -8 1 3939 190 1
 -6 -8 1 4028 174 1
 -6 8 1 3718 178 1
 -6 8 1 3861 169 1
 6 8 -1 3876 157 1
 -5 -8 1 5161 226 1
 -5 -8 1 4998 241 1
 5 -8 -1 5097 224 1
 -5 8 1 5947 227 1
 5 8 -1 6037 219 1
 -5 8 1 6452 242 1
 4 -8 -1 9057 352 1
 -4 -8 1 9046 345 1
 -4 -8 1 8708 365 1
 4 8 -1 9103 344 1
 -4 8 1 9132 358 1
 -4 8 1 8818 342 1
 -3 -8 1 27114 985 1
 -3 -8 1 28003 943 1
 -3 8 1 26771 977 1
 3 8 -1 27215 968 1
 -3 8 1 27006 937 1
 -2 -8 1 14249 539 1
 -2 8 1 14657 513 1
 2 8 -1 14603 535 1
 -2 8 1 14433 544 1
 -2 8 1 14027 535 1
 -1 -8 1 308 35 1
 1 8 -1 338 41 1
 -1 8 1 344 36 1
 -1 8 1 287 41 1
 0 -8 -1 381 34 1
 0 8 -1 225 32 1
 0 8 1 336 34 1
 1 -8 1 2503 122 1
 -1 -8 -1 2666 123 1
 1 8 1 2230 114 1
 -2 -8 -1 491 41 1
 2 -8 1 526 53 1
 -2 -8 -1 463 50 1
 2 8 1 584 48 1
 -3 -8 -1 134 40 1
 -3 -8 -1 131 30 1
 3 -8 1 116 34 1
 -3 8 -1 174 34 1
 3 8 1 194 35 1
 -3 8 -1 200 29 1
 -4 -8 -1 3882 192 1
 4 -8 1 4034 185 1
 -4 -8 -1 3829 174 1
 -4 8 -1 4267 179 1
 4 8 1 4452 181 1
 -4 8 -1 4538 178 1
 -5 -8 -1 1207 87 1
 5 -8 1 1214 73 1
 -5 -8 -1 1127 70 1
 -5 8 -1 1205 71 1
 5 8 1 1078 67 1
 -5 8 -1 1125 70 1
 6 -8 1 4870 222 1
 -6 -8 -1 5024 238 1
 -6 -8 -1 5009 217 1
 -6 8 -1 5817 226 1
 -6 8 -1 5601 223 1
 6 8 1 5196 217 1
 -7 -8 -1 3442 161 1
 -7 -8 -1 3248 177 1
 7 -8 1 3456 161 1
 7 8 1 3342 153 1
 -7 8 -1 3479 163 1
 -7 8 -1 3345 162 1
 -8 -8 -1 312 62 1
 -8 -8 -1 250 47 1
 8 -8 1 365 50 1
 -8 8 -1 343 53 1
 -8 8 -1 354 54 1
 8 8 1 382 46 1
 9 -8 1 90 36 1
 -9 -8 -1 21 45 1
 -9 -8 -1 21 32 1
 -9 8 -1 53 37 1
 9 8 1 0 29 1
 -9 8 -1 0 31 1
 -10 -8 -1 1110 95 1
 -10 -8 -1 875 100 1
 10 -8 1 965 78 1
 -10 8 -1 901 84 1
 -11 -8 -1 635 78 1
 -11 -8 -1 600 89 1
 -11 8 -1 749 79 1
 -12 -8 -1 397 82 1
 -12 -8 -1 321 62 1
 -12 8 -1 411 67 1
 -13 -8 -1 297 67 1
 -13 -8 -1 408 84 1
 -13 8 -1 402 67 1
 -14 -8 -1 121 73 1
 -14 -8 -1 178 60 1
 -14 8 -1 56 54 1
 -14 -9 1 383 75 1
 -14 -9 1 370 82 1
 -14 9 1 544 83 1
 -13 -9 1 152 50 1
 -13 -9 1 124 66 1
 -13 9 1 191 66 1
 -13 9 1 230 59 1
 -12 -9 1 353 67 1
 -12 -9 1 351 79 1
 -12 9 1 481 73 1
 -12 9 1 277 66 1
 -11 -9 1 1480 133 1
 -11 -9 1 1278 105 1
 -11 9 1 1359 103 1
 -11 9 1 1477 119 1
 -10 -9 1 4161 198 1
 -10 -9 1 4424 220 1
 -10 9 1 4309 205 1
 -10 9 1 4227 196 1
 -9 -9 1 16 40 1
 -9 -9 1 113 39 1
 -9 9 1 105 38 1
 -9 9 1 65 42 1
 8 -9 -1 1605 90 1
 -8 -9 1 1568 112 1
 -8 -9 1 1579 99 1
 -8 9 1 1582 99 1
 -8 9 1 1705 108 1
 -7 -9 1 1501 106 1
 7 -9 -1 1430 84 1
 -7 -9 1 1618 97 1
 7 9 -1 1335 76 1
 -7 9 1 1268 87 1
 -7 9 1 1282 97 1
 -6 -9 1 1419 94 1
 6 -9 -1 1371 86 1
 -6 -9 1 1435 107 1
 -6 9 1 1553 91 1
 6 9 -1 1455 79 1
 -6 9 1 1384 97 1
 5 -9 -1 8143 309 1
 -5 -9 1 7706 324 1
 -5 -9 1 8132 306 1
 5 9 -1 7582 298 1
 -5 9 1 7875 303 1
 -5 9 1 7891 315 1
 -4 -9 1 23857 867 1
 4 -9 -1 25406 857 1
 -4 -9 1 24352 826 1
 4 9 -1 24367 843 1
 -4 9 1 24058 822 1
 -4 9 1 20031 851 1
 -3 -9 1 2236 110 1
 -3 -9 1 2044 98 1
 -3 9 1 2380 97 1
 3 9 -1 2219 95 1
 -2 -9 1 13730 542 1
 2 9 -1 13625 539 1
 -2 9 1 13973 549 1
 -2 9 1 13666 513 1
 -1 -9 1 30205 1067 1
 1 9 -1 29198 1071 1
 -1 9 1 31256 1068 1
 -1 9 1 30698 1080 1
 0 -9 -1 1111 59 1
 0 9 -1 1069 65 1
 0 9 1 1047 62 1
 -1 -9 -1 5242 219 1
 1 9 1 5604 218 1
 -1 9 -1 5669 224 1
 -2 -9 -1 330 50 1
 2 -9 1 245 43 1
 -2 -9 -1 323 37 1
 2 9 1 316 42 1
 3 -9 1 372 48 1
 -3 -9 -1 372 51 1
 -3 -9 -1 378 40 1
 -3 9 -1 355 35 1
 -3 9 -1 303 39 1
 3 9 1 326 41 1
 4 -9 1 2495 126 1
 -4 -9 -1 2512 117 1
 -4 -9 -1 2428 132 1
 -4 9 -1 2264 112 1
 4 9 1 2238 116 1
 -4 9 -1 2470 121 1
 -5 -9 -1 2297 114 1
 -5 -9 -1 2374 131 1
 5 -9 1 2166 116 1
 -5 9 -1 2290 112 1
 -5 9 -1 2316 115 1
 5 9 1 2241 111 1
 -6 -9 -1 12649 485 1
 -6 -9 -1 12784 455 1
 6 -9 1 12306 468 1
 6 9 1 11699 461 1
 -6 9 -1 12054 464 1
 -6 9 -1 12156 455 1
 -7 -9 -1 2369 119 1
 -7 -9 -1 2321 135 1
 7 -9 1 2361 121 1
 -7 9 -1 2204 119 1
 7 9 1 2118 112 1
 -7 9 -1 2224 121 1
 -8 -9 -1 356 65 1
 8 -9 1 374 52 1
 -8 -9 -1 485 62 1
 -8 9 -1 321 53 1
 -8 9 -1 298 53 1
 8 9 1 250 42 1
 9 -9 1 64 36 1
 -9 -9 -1 54 38 1
 -9 -9 -1 37 41 1
 -9 9 -1 55 41 1
 9 9 1 31 33 1
 -9 9 -1 57 36 1
 10 -9 1 249 48 1
 -10 -9 -1 201 53 1
 -10 -9 -1 304 68 1
 -10 9 -1 261 53 1
 -10 9 -1 34 38 1
 -11 -9 -1 474 65 1
 -11 -9 -1 516 83 1
 -11 9 -1 185 43 1
 -11 9 -1 410 61 1
 -12 -9 -1 399 64 1
 -12 -9 -1 402 78 1
 -12 9 -1 438 71 1
 -13 -9 -1 988 116 1
 -13 -9 -1 773 89 1
 -13 9 -1 845 92 1
 -14 -9 -1 165 52 1
 -14 9 -1 161 63 1
 -14 -10 1 28 64 1
 -14 -10 1 18 53 1
 -14 10 1 8 50 1
 -13 -10 1 629 83 1
 -13 -10 1 584 86 1
 -13 10 1 599 79 1
 -12 -10 1 1220 121 1
 -12 -10 1 1298 114 1
 -12 10 1 1193 119 1
 -12 10 1 1217 108 1
 -11 -10 1 428 68 1
 -11 -10 1 587 88 1
 -11 10 1 510 67 1
 -11 10 1 668 84 1
 -10 -10 1 425 77 1
 -10 -10 1 399 64 1
 -10 10 1 285 54 1
 -10 10 1 313 63 1
 -9 -10 1 33 35 1
 -9 -10 1 106 55 1
 -9 10 1 1 40 1
 -9 10 1 41 34 1
 -8 -10 1 1714 105 1
 8 -10 -1 1528 92 1
 -8 -10 1 1415 115 1
 -8 10 1 1595 102 1
 -8 10 1 1707 111 1
 7 -10 -1 4250 188 1
 -7 -10 1 4249 195 1
 -7 -10 1 4430 215 1
 7 10 -1 4128 180 1
 -7 10 1 4479 204 1
 -7 10 1 4132 193 1
 -6 -10 1 1595 114 1
 6 -10 -1 1775 97 1
 -6 -10 1 1866 105 1
 -6 10 1 1579 102 1
 6 10 -1 1644 88 1
 -6 10 1 1683 100 1
 -5 -10 1 3576 179 1
 -5 -10 1 3834 167 1
 5 -10 -1 3546 163 1
 -5 10 1 3786 162 1
 5 10 -1 3788 155 1
 4 -10 -1 22612 788 1
 -4 -10 1 21650 760 1
 -4 -10 1 21964 798 1
 -4 10 1 20046 753 1
 4 10 -1 20739 774 1
 -3 -10 1 6735 268 1
 -3 -10 1 6424 281 1
 -3 10 1 6612 262 1
 3 10 -1 6520 269 1
 -3 10 1 6266 281 1
 -2 -10 1 1551 92 1
 -2 10 1 1496 97 1
 2 10 -1 1406 88 1
 -1 -10 1 647 59 1
 -1 10 1 681 73 1
 1 10 -1 632 66 1
 -1 10 1 668 54 1
 0 -10 1 17139 613 1
 0 -10 -1 17375 624 1
 0 10 -1 17635 633 1
 0 10 1 18035 633 1
 -1 -10 -1 149 35 1
 1 10 1 180 35 1
 -1 10 -1 99 31 1
 2 -10 1 5745 240 1
 -2 -10 -1 6143 244 1
 2 10 1 5674 234 1
 -3 -10 -1 1102 68 1
 3 -10 1 944 74 1
 -3 -10 -1 1042 83 1
 -3 10 -1 1141 62 1
 3 10 1 1142 73 1
 -3 10 -1 1031 72 1
 4 -10 1 164 41 1
 -4 -10 -1 179 36 1
 -4 -10 -1 217 51 1
 -4 10 -1 217 34 1
 4 10 1 228 38 1
 -4 10 -1 306 46 1
 -5 -10 -1 1593 107 1
 -5 -10 -1 1561 93 1
 5 -10 1 1500 99 1
 -5 10 -1 1927 95 1
 -5 10 -1 1886 101 1
 5 10 1 1794 94 1
 -6 -10 -1 2307 139 1
 6 -10 1 2476 125 1
 -6 -10 -1 2320 120 1
 6 10 1 2328 117 1
 -6 10 -1 2146 121 1
 -6 10 -1 2199 117 1
 -7 -10 -1 2805 139 1
 -7 -10 -1 3000 161 1
 7 -10 1 2733 139 1
 7 10 1 3066 135 1
 -7 10 -1 3149 142 1
 -7 10 -1 3091 144 1
 -8 -10 -1 809 73 1
 8 -10 1 884 73 1
 -8 -10 -1 819 89 1
 -8 10 -1 942 73 1
 8 10 1 776 62 1
 -8 10 -1 690 69 1
 -9 -10 -1 287 54 1
 -9 -10 -1 327 69 1
 9 -10 1 281 48 1
 -9 10 -1 189 48 1
 9 10 1 223 41 1
 -9 10 -1 151 44 1
 10 -10 1 286 50 1
 -10 -10 -1 245 67 1
 -10 -10 -1 160 50 1
 -10 10 -1 251 51 1
 -10 10 -1 286 56 1
 -11 -10 -1 461 77 1
 -11 -10 -1 378 60 1
 -11 10 -1 447 67 1
 -12 -10 -1 476 74 1
 -12 -10 -1 533 92 1
 -12 10 -1 584 76 1
 -13 -10 -1 252 65 1
 -13 10 -1 352 70 1
 -14 -10 -1 212 65 1
 -14 -10 -1 73 70 1
 -14 10 -1 94 58 1
 -14 -11 1 226 69 1
 -14 -11 1 154 74 1
 -14 11 1 152 52 1
 -13 -11 1 1121 101 1
 -13 -11 1 964 119 1
 -13 11 1 1192 105 1
 -12 -11 1 298 77 1
 -12 -11 1 385 64 1
 -12 11 1 410 69 1
 -12 11 1 416 74 1
 -11 -11 1 1527 109 1
 -11 -11 1 1532 125 1
 -11 11 1 1686 114 1
 -11 11 1 1609 118 1
 -10 -11 1 997 94 1
 -10 -11 1 777 92 1
 -10 11 1 754 80 1
 -10 11 1 663 82 1
 -9 -11 1 2148 140 1
 -9 -11 1 2154 125 1
 -9 11 1 2323 126 1
 -9 11 1 2386 133 1
 -8 -11 1 1621 106 1
 8 -11 -1 1652 98 1
 -8 -11 1 1745 125 1
 -8 11 1 1734 110 1
 -8 11 1 1697 106 1
 7 -11 -1 2226 121 1
 -7 -11 1 2443 129 1
 -7 -11 1 2373 147 1
 -7 11 1 2580 130 1
 7 11 -1 2330 113 1
 -7 11 1 2343 132 1
 -6 -11 1 4793 197 1
 6 -11 -1 4482 191 1
 -6 -11 1 4571 212 1
 -6 11 1 3798 185 1
 6 11 -1 3984 179 1
 -5 -11 1 2412 134 1
 5 -11 -1 2564 123 1
 -5 -11 1 2609 124 1
 5 11 -1 2391 111 1
 -5 11 1 2228 115 1
 -4 -11 1 13275 498 1
 4 -11 -1 13422 519 1
 -4 -11 1 12804 523 1
 4 11 -1 14267 507 1
 -4 11 1 14596 496 1
 -3 -11 1 1891 104 1
 -3 11 1 2145 94 1
 3 11 -1 1806 93 1
 -3 11 1 1993 108 1
 -2 -11 1 6410 258 1
 2 11 -1 5854 255 1
 -2 11 1 6320 240 1
 -2 11 1 6199 266 1
 1 -11 -1 4038 161 1
 -1 -11 1 4067 162 1
 -1 11 1 3768 177 1
 1 11 -1 3796 170 1
 0 -11 1 13721 484 1
 0 -11 -1 13760 495 1
 0 11 1 13987 503 1
 0 11 -1 13549 503 1
 -1 -11 -1 34989 1273 1
 -1 11 -1 35331 1280 1
 1 11 1 34596 1272 1
 -2 -11 -1 6978 279 1
 2 -11 1 7060 282 1
 2 11 1 7024 274 1
 3 -11 1 5541 231 1
 -3 -11 -1 5470 232 1
 -3 -11 -1 5781 213 1
 -3 11 -1 5107 206 1
 3 11 1 5204 220 1
 -3 11 -1 5016 215 1
 -4 -11 -1 221 41 1
 4 -11 1 235 46 1
 -4 -11 -1 190 48 1
 -4 11 -1 288 38 1
 4 11 1 244 41 1
 -4 11 -1 251 46 1
 -5 -11 -1 1738 98 1
 -5 -11 -1 1900 120 1
 5 -11 1 1616 104 1
 -5 11 -1 1660 101 1
 -5 11 -1 1676 95 1
 5 11 1 1606 95 1
 6 -11 1 1271 86 1
 -6 -11 -1 1204 97 1
 -6 -11 -1 1283 80 1
 6 11 1 1182 77 1
 -6 11 -1 1157 83 1
 -6 11 -1 1116 78 1
 -7 -11 -1 1695 100 1
 -7 -11 -1 1882 121 1
 7 -11 1 1638 100 1
 -7 11 -1 1568 99 1
 7 11 1 1395 89 1
 -7 11 -1 1533 94 1
 8 -11 1 430 56 1
 -8 -11 -1 494 63 1
 -8 -11 -1 351 67 1
 -8 11 -1 287 52 1
 8 11 1 434 52 1
 -8 11 -1 358 52 1
 -9 -11 -1 2069 138 1
 9 -11 1 2410 118 1
 -9 -11 -1 1878 117 1
 9 11 1 1876 106 1
 -9 11 -1 2010 117 1
 -9 11 -1 1956 117 1
 -10 -11 -1 489 84 1
 -10 -11 -1 455 68 1
 10 -11 1 512 62 1
 -10 11 -1 377 59 1
 -10 11 -1 445 66 1
 -11 -11 -1 1105 114 1
 -11 -11 -1 1134 99 1
 -11 11 -1 1005 96 1
 -12 -11 -1 532 94 1
 -12 -11 -1 517 77 1
 -12 11 -1 557 75 1
 -13 -11 -1 166 50 1
 -13 -11 -1 184 76 1
 -13 11 -1 285 64 1
 -14 -11 -1 525 81 1
 -14 11 -1 590 79 1
 -14 -12 1 152 61 1
 -14 12 1 216 63 1
 -13 -12 1 33 51 1
 -13 -12 1 103 70 1
 -13 12 1 115 47 1
 -12 -12 1 293 78 1
 -12 -12 1 300 64 1
 -12 12 1 267 69 1
 -12 12 1 291 62 1
 -11 -12 1 139 52 1
 -11 -12 1 130 62 1
 -11 12 1 243 59 1
 -11 12 1 187 51 1
 -10 -12 1 11476 479 1
 -10 -12 1 11544 449 1
 -10 12 1 11597 463 1
 -10 12 1 11183 442 1
 -9 -12 1 262 65 1
 -9 -12 1 335 59 1
 9 -12 -1 301 50 1
 -9 12 1 387 59 1
 -9 12 1 307 58 1
 -8 -12 1 235 49 1
 8 -12 -1 371 50 1
 -8 -12 1 271 62 1
 -8 12 1 387 57 1
 -8 12 1 350 56 1
 -7 -12 1 936 96 1
 7 -12 -1 816 68 1
 -7 -12 1 834 80 1
 7 12 -1 882 62 1
 -7 12 1 915 74 1
 -6 -12 1 1741 119 1
 6 -12 -1 1846 105 1
 -6 -12 1 1774 106 1
 6 12 -1 2277 101 1
 -6 12 1 2158 109 1
 5 -12 -1 1720 96 1
 -5 -12 1 1532 93 1
 -5 -12 1 1716 108 1
 5 12 -1 1357 82 1
 -5 12 1 1358 86 1
 -4 -12 1 199 43 1
 4 -12 -1 199 44 1
 -4 -12 1 302 46 1
 -4 12 1 161 36 1
 -4 12 1 124 34 1
 -4 12 1 74 28 1
 4 12 -1 182 37 1
 -3 -12 1 456 55 1
 3 12 -1 539 55 1
 -3 12 1 584 54 1
 -3 12 1 578 66 1
 -2 -12 1 5292 230 1
 2 12 -1 5294 231 1
 -2 12 1 5444 241 1
 1 -12 -1 121 33 1
 -1 -12 1 171 36 1
 1 12 -1 116 43 1
 -1 12 1 149 50 1
 0 -12 1 1076 65 1
 0 -12 -1 1229 77 1
 0 12 1 1290 90 1
 0 12 -1 1162 86 1
 -1 -12 -1 49465 1775 1
 -1 12 -1 49758 1781 1
 1 12 1 50067 1776 1
 -2 -12 -1 3107 157 1
 2 -12 1 3115 159 1
 2 12 1 3329 154 1
 3 -12 1 2429 130 1
 -3 -12 -1 2524 131 1
 -3 -12 -1 2500 116 1
 -3 12 -1 2423 106 1
 3 12 1 2410 121 1
 4 -12 1 2363 121 1
 -4 -12 -1 2461 110 1
 -4 -12 -1 2534 132 1
 -4 12 -1 2057 110 1
 4 12 1 2003 109 1
 -4 12 -1 1946 98 1
 5 -12 1 1487 93 1
 -5 -12 -1 1540 87 1
 -5 -12 -1 1488 101 1
 5 12 1 1242 81 1
 -5 12 -1 1127 76 1
 -5 12 -1 1225 82 1
 6 -12 1 72 35 1
 -6 -12 -1 72 28 1
 -6 -12 -1 20 41 1
 -6 12 -1 104 33 1
 6 12 1 88 31 1
 -6 12 -1 124 35 1
 7 -12 1 22 32 1
 -7 -12 -1 1 38 1
 -7 -12 -1 8 33 1
 -7 12 -1 2 32 1
 7 12 1 73 32 1
 -7 12 -1 27 30 1
 8 -12 1 1702 105 1
 -8 -12 -1 1675 119 1
 -8 -12 -1 1591 103 1
 8 12 1 1736 98 1
 -8 12 -1 1949 110 1
 -8 12 -1 1699 104 1
 -9 -12 -1 687 90 1
 9 -12 1 596 66 1
 -9 -12 -1 747 78 1
 9 12 1 579 61 1
 -9 12 -1 574 69 1
 -9 12 -1 609 73 1
 -10 -12 -1 2550 145 1
 -10 -12 -1 2736 169 1
 10 -12 1 2903 143 1
 -10 12 -1 2671 145 1
 -11 -12 -1 221 70 1
 -11 -12 -1 224 54 1
 -11 12 -1 137 50 1
 -12 -12 -1 353 63 1
 -12 -12 -1 274 77 1
 -12 12 -1 315 61 1
 -13 -12 -1 549 96 1
 -13 -12 -1 486 77 1
 -13 12 -1 500 76 1
 -14 -12 -1 367 69 1
 -14 12 -1 419 79 1
 -14 -13 1 114 60 1
 -14 13 1 85 56 1
 -13 -13 1 74 47 1
 -13 -13 1 13 63 1
 -13 13 1 60 45 1
 -12 -13 1 239 54 1
 -12 -13 1 196 75 1
 -12 13 1 239 58 1
 -11 -13 1 932 100 1
 -11 -13 1 994 114 1
 -11 13 1 869 90 1
 -11 13 1 1022 99 1
 -10 -13 1 5535 261 1
 -10 -13 1 6209 293 1
 -10 13 1 6492 274 1
 -10 13 1 6255 262 1
 9 -13 -1 1937 108 1
 -9 -13 1 2071 140 1
 -9 -13 1 1928 120 1
 -9 13 1 1421 110 1
 -9 13 1 1840 111 1
 8 -13 -1 1224 84 1
 -8 -13 1 1080 112 1
 -8 -13 1 1145 88 1
 -8 13 1 1243 90 1
 -7 -13 1 1618 119 1
 -7 -13 1 1505 103 1
 7 -13 -1 1693 101 1
 -7 13 1 1490 97 1
 7 13 -1 1630 91 1
 -6 -13 1 4357 188 1
 -6 -13 1 4625 207 1
 6 -13 -1 4349 189 1
 -6 13 1 4017 182 1
 6 13 -1 4241 178 1
 -5 -13 1 1424 98 1
 -5 -13 1 1589 93 1
 5 -13 -1 1662 96 1
 5 13 -1 1255 79 1
 -5 13 1 1269 85 1
 -5 13 1 1380 83 1
 -4 -13 1 4180 169 1
 -4 -13 1 3851 176 1
 -4 13 1 3480 160 1
 -4 13 1 3483 157 1
 4 13 -1 3448 160 1
 -4 13 1 3150 169 1
 -3 -13 1 1474 94 1
 -3 13 1 1240 95 1
 3 13 -1 1256 84 1
 -3 13 1 1281 79 1
 -3 13 1 1184 77 1
 -2 -13 1 1242 76 1
 2 13 -1 1139 78 1
 -2 13 1 907 84 1
 -1 -13 1 2714 127 1
 1 -13 -1 2513 125 1
 -1 13 1 2844 147 1
 1 13 -1 2932 141 1
 0 -13 -1 37065 1374 1
 0 -13 1 38721 1364 1
 0 13 -1 38149 1385 1
 0 13 1 39160 1385 1
 -1 -13 -1 15651 624 1
 1 -13 1 16287 606 1
 -1 13 -1 16294 636 1
 1 13 1 15994 627 1
 -2 -13 -1 11285 437 1
 2 -13 1 11015 440 1
 2 13 1 11481 433 1
 -2 13 -1 10929 442 1
 3 -13 1 857 80 1
 -3 -13 -1 845 61 1
 -3 -13 -1 645 70 1
 3 13 1 848 67 1
 -3 13 -1 924 52 1
 4 -13 1 2343 124 1
 -4 -13 -1 2389 112 1
 -4 -13 -1 1949 125 1
 4 13 1 2148 112 1
 -4 13 -1 2192 102 1
 -4 13 -1 2074 111 1
 5 -13 1 1136 87 1
 -5 -13 -1 1571 86 1
 -5 -13 -1 1250 96 1
 5 13 1 1470 86 1
 -5 13 -1 994 80 1
 -5 13 -1 1120 74 1
 -6 -13 -1 1879 120 1
 -6 -13 -1 1848 105 1
 6 -13 1 1916 113 1
 -6 13 -1 1781 105 1
 6 13 1 1964 105 1
 -6 13 -1 1862 100 1
 -7 -13 -1 107 37 1
 -7 -13 -1 103 48 1
 7 -13 1 120 41 1
 7 13 1 79 33 1
 -7 13 -1 81 35 1
 -7 13 -1 127 41 1
 -8 -13 -1 749 70 1
 -8 -13 -1 545 80 1
 8 -13 1 463 60 1
 -8 13 -1 566 67 1
 8 13 1 642 62 1
 -8 13 -1 560 64 1
 -9 -13 -1 1181 115 1
 9 -13 1 960 83 1
 -9 -13 -1 879 83 1
 -9 13 -1 819 78 1
 -9 13 -1 850 81 1
 9 13 1 826 71 1
 10 -13 1 2306 124 1
 -10 -13 -1 2069 127 1
 -10 -13 -1 2174 149 1
 -10 13 -1 2032 125 1
 -11 -13 -1 144 63 1
 -11 -13 -1 157 53 1
 -11 13 -1 84 46 1
 -12 -13 -1 133 51 1
 -12 -13 -1 43 61 1
 -12 13 -1 36 44 1
 -13 -13 -1 22 63 1
 -13 -13 -1 59 51 1
 -13 13 -1 57 45 1
 -14 -13 -1 131 59 1
 -14 13 -1 171 62 1
 -14 -14 1 125 61 1
 -14 14 1 119 59 1
 -13 -14 1 436 91 1
 -13 -14 1 500 82 1
 -13 14 1 402 64 1
 -12 -14 1 1502 129 1
 -12 -14 1 1507 144 1
 -12 14 1 1196 105 1
 -11 -14 1 158 65 1
 -11 -14 1 102 46 1
 -11 14 1 67 41 1
 -11 14 1 29 41 1
 -10 -14 1 850 88 1
 -10 -14 1 878 99 1
 -10 14 1 1002 90 1
 -9 -14 1 11373 462 1
 9 -14 -1 10988 426 1
 -9 -14 1 10766 425 1
 -9 14 1 10802 422 1
 -8 -14 1 5130 225 1
 -8 -14 1 5101 249 1
 8 -14 -1 5095 223 1
 -8 14 1 4908 222 1
 7 -14 -1 1054 79 1
 -7 -14 1 1069 103 1
 -7 -14 1 1078 80 1
 -7 14 1 745 77 1
 -7 14 1 1056 77 1
 7 14 -1 881 67 1
 -6 -14 1 1371 106 1
 6 -14 -1 1435 93 1
 -6 -14 1 1246 92 1
 6 14 -1 1377 84 1
 -6 14 1 1456 92 1
 -6 14 1 1484 91 1
 -5 -14 1 2594 148 1
 5 -14 -1 2952 145 1
 -5 -14 1 2515 133 1
 -5 14 1 2880 136 1
 -5 14 1 2630 131 1
 5 14 -1 2656 130 1
 -4 -14 1 3225 175 1
 -4 -14 1 3180 164 1
 -4 14 1 3807 161 1
 4 14 -1 4130 170 1
 -4 14 1 3870 167 1
 -4 14 1 3958 182 1
 -3 -14 1 1029 80 1
 -3 14 1 1285 77 1
 -3 14 1 1374 76 1
 -3 14 1 1364 96 1
 3 14 -1 1467 87 1
 -2 -14 1 202 36 1
 -2 14 1 79 21 1
 2 14 -1 140 38 1
 1 -14 -1 293 40 1
 -1 -14 1 389 44 1
 1 14 -1 342 53 1
 -1 14 1 298 55 1
 0 -14 1 20248 723 1
 0 -14 -1 19953 733 1
 0 14 -1 19896 746 1
 0 14 1 19498 744 1
 -1 -14 -1 645 67 1
 1 -14 1 616 46 1
 -1 14 -1 304 58 1
 1 14 1 510 65 1
 -2 -14 -1 7124 309 1
 2 -14 1 6992 282 1
 2 14 1 7653 308 1
 -2 14 -1 7539 317 1
 -3 -14 -1 6859 293 1
 3 -14 1 6901 295 1
 -3 -14 -1 7158 273 1
 3 14 1 7550 288 1
 -3 14 -1 7357 267 1
 -4 -14 -1 580 70 1
 4 -14 1 517 63 1
 -4 -14 -1 585 56 1
 -4 14 -1 568 59 1
 4 14 1 465 53 1
 -4 14 -1 537 45 1
 -5 -14 -1 59 43 1
 -5 -14 -1 71 31 1
 5 -14 1 67 35 1
 5 14 1 94 33 1
 -5 14 -1 67 28 1
 -5 14 -1 59 33 1
 -6 -14 -1 2144 128 1
 6 -14 1 2209 118 1
 -6 -14 -1 2119 109 1
 -6 14 -1 1872 106 1
 6 14 1 1885 104 1
 -6 14 -1 2010 102 1
 -7 -14 -1 247 47 1
 7 -14 1 224 48 1
 -7 -14 -1 206 51 1
 7 14 1 155 38 1
 -7 14 -1 170 45 1
 -7 14 -1 208 41 1
 -8 -14 -1 1420 118 1
 -8 -14 -1 1593 101 1
 8 -14 1 1513 102 1
 8 14 1 1645 96 1
 -8 14 -1 1596 102 1
 -8 14 -1 1451 98 1
 9 -14 1 3612 170 1
 -9 -14 -1 3624 172 1
 -9 -14 -1 3506 193 1
 -9 14 -1 3215 168 1
 -9 14 -1 3151 173 1
 9 14 1 3437 165 1
 -10 -14 -1 230 51 1
 -10 -14 -1 202 62 1
 10 -14 1 139 43 1
 -10 14 -1 134 46 1
 -11 -14 -1 2046 130 1
 -11 -14 -1 1875 152 1
 -11 14 -1 1895 125 1
 -12 -14 -1 211 73 1
 -12 -14 -1 202 51 1
 -12 14 -1 338 60 1
 -13 -14 -1 83 49 1
 -13 -14 -1 27 62 1
 -13 14 -1 1 42 1
 -14 -14 -1 393 71 1
 -14 -14 -1 307 85 1
 -14 14 -1 311 66 1
 -14 -15 1 0 51 1
 -14 15 1 0 48 1
 -13 -15 1 26 50 1
 -13 -15 1 1 61 1
 -13 15 1 66 51 1
 -12 -15 1 15 57 1
 -12 -15 1 31 41 1
 -12 15 1 0 42 1
 -11 -15 1 3051 189 1
 -11 -15 1 3172 171 1
 -11 15 1 3231 162 1
 -10 -15 1 734 86 1
 -10 -15 1 458 75 1
 -10 15 1 544 69 1
 -9 -15 1 140 43 1
 -9 -15 1 163 61 1
 9 -15 -1 162 44 1
 -9 15 1 199 47 1
 -9 15 1 94 40 1
 8 -15 -1 24519 897 1
 -8 -15 1 24088 875 1
 -8 -15 1 24045 925 1
 -8 15 1 24742 871 1
 -8 15 1 24359 901 1
 7 -15 -1 414 56 1
 -7 -15 1 482 62 1
 -7 -15 1 338 67 1
 -7 15 1 382 53 1
 7 15 -1 424 50 1
 -7 15 1 399 56 1
 6 -15 -1 290 50 1
 -6 -15 1 324 55 1
 -6 -15 1 393 67 1
 6 15 -1 413 48 1
 -6 15 1 452 57 1
 -6 15 1 425 56 1
 -5 -15 1 675 71 1
 5 -15 -1 909 86 1
 -5 -15 1 754 83 1
 5 15 -1 764 65 1
 -5 15 1 778 66 1
 -5 15 1 782 68 1
 -4 -15 1 1461 92 1
 -4 -15 1 1177 93 1
 4 15 -1 1053 79 1
 -4 15 1 1058 75 1
 -4 15 1 1142 93 1
 -4 15 1 1039 78 1
 -3 -15 1 371 57 1
 -3 15 1 352 48 1
 -3 15 1 403 64 1
 3 15 -1 352 54 1
 -2 -15 1 2415 127 1
 2 15 -1 2581 135 1
 -2 15 1 2180 115 1
 -2 15 1 2809 148 1
 -1 -15 1 2469 117 1
 1 -15 -1 2406 114 1
 -1 15 1 2336 136 1
 1 15 -1 2207 129 1
 0 -15 1 358 38 1
 0 -15 -1 361 45 1
 0 15 1 306 50 1
 -1 -15 -1 23122 861 1
 1 -15 1 23253 842 1
 -1 15 -1 23377 874 1
 1 15 1 23341 866 1
 2 -15 1 12440 445 1
 -2 -15 -1 11976 471 1
 -2 15 -1 11497 477 1
 2 15 1 11622 467 1
 3 -15 1 4790 225 1
 -3 -15 -1 4896 224 1
 -3 15 -1 5301 195 1
 3 15 1 4861 216 1
 4 -15 1 978 81 1
 -4 -15 -1 924 90 1
 -4 -15 -1 880 66 1
 -4 15 -1 852 56 1
 4 15 1 748 70 1
 -5 -15 -1 1287 81 1
 -5 -15 -1 1271 101 1
 5 -15 1 1204 90 1
 -5 15 -1 1209 72 1
 5 15 1 1131 78 1
 -5 15 -1 1191 81 1
 -6 -15 -1 4371 199 1
 6 -15 1 4198 208 1
 -6 -15 -1 4321 221 1
 -6 15 -1 4910 204 1
 -6 15 -1 5157 199 1
 6 15 1 4919 203 1
 7 -15 1 0 31 1
 -7 -15 -1 39 40 1
 -7 -15 -1 2 31 1
 -7 15 -1 0 28 1
 -7 15 -1 16 29 1
 7 15 1 5 30 1
 8 -15 1 505 67 1
 -8 -15 -1 524 68 1
 -8 -15 -1 578 86 1
 8 15 1 639 66 1
 -8 15 -1 698 75 1
 -8 15 -1 580 65 1
 -9 -15 -1 2433 140 1
 -9 -15 -1 2736 165 1
 9 -15 1 2597 143 1
 -9 15 -1 2472 140 1
 9 15 1 2500 134 1
 -10 -15 -1 22 37 1
 -10 -15 -1 0 51 1
 10 -15 1 7 37 1
 -10 15 -1 33 37 1
 -11 -15 -1 577 82 1
 -11 -15 -1 692 97 1
 -11 15 -1 629 78 1
 -12 -15 -1 3637 212 1
 -12 -15 -1 3144 183 1
 -12 15 -1 3365 175 1
 -13 -15 -1 151 72 1
 -13 -15 -1 149 57 1
 -13 15 -1 175 59 1
 -14 -15 -1 560 96 1
 -14 -15 -1 638 86 1
 -14 15 -1 543 84 1
 -14 -16 1 80 50 1
 -14 16 1 74 49 1
 -13 -16 1 414 76 1
 -13 -16 1 422 91 1
 -13 16 1 494 77 1
 -12 -16 1 227 74 1
 -12 -16 1 189 61 1
 -12 16 1 286 61 1
 -11 -16 1 102 61 1
 -11 -16 1 163 48 1
 -11 16 1 130 47 1
 -10 -16 1 2460 147 1
 -10 -16 1 2483 161 1
 -10 16 1 2573 144 1
 -10 16 1 2552 146 1
 -9 -16 1 190 52 1
 9 -16 -1 129 43 1
 -9 -16 1 272 70 1
 -9 16 1 292 56 1
 -9 16 1 277 55 1
 8 -16 -1 1537 99 1
 -8 -16 1 1330 98 1
 -8 -16 1 1248 110 1
 -8 16 1 1357 95 1
 -8 16 1 1335 99 1
 -7 -16 1 390 67 1
 7 -16 -1 438 57 1
 -7 -16 1 328 55 1
 -7 16 1 525 62 1
 7 16 -1 378 50 1
 -7 16 1 476 59 1
 6 -16 -1 2786 144 1
 -6 -16 1 2663 152 1
 -6 -16 1 3036 144 1
 -6 16 1 2735 138 1
 6 16 -1 2743 134 1
 -6 16 1 2731 136 1
 5 -16 -1 1 30 1
 -5 -16 1 1 26 1
 -5 -16 1 17 37 1
 5 16 -1 21 31 1
 -5 16 1 14 27 1
 -5 16 1 1 26 1
 -4 -16 1 185 46 1
 -4 -16 1 133 39 1
 4 16 -1 154 42 1
 -4 16 1 111 32 1
 -4 16 1 163 37 1
 -4 16 1 144 47 1
 -3 -16 1 10951 433 1
 3 16 -1 10712 429 1
 -3 16 1 11107 447 1
 -3 16 1 11008 418 1
 -2 -16 1 9181 341 1
 2 -16 -1 7830 328 1
 -2 16 1 8982 358 1
 2 16 -1 9259 348 1
 -2 16 1 9202 330 1
 -1 -16 1 312 43 1
 1 -16 -1 239 38 1
 -1 16 1 434 65 1
 1 16 -1 174 47 1
 0 -16 -1 2407 123 1
 0 -16 1 2375 114 1
 0 16 1 2405 139 1
 0 16 -1 2327 138 1
 -1 -16 -1 67474 2427 1
 1 -16 1 69258 2407 1
 -1 16 -1 67086 2438 1
 1 16 1 64269 2429 1
 2 -16 1 386 33 1
 -2 -16 -1 337 49 1
 2 16 1 431 53 1
 -2 16 -1 429 57 1
 -3 -16 -1 4403 198 1
 3 -16 1 4293 200 1
 -3 16 -1 4241 168 1
 3 16 1 3995 188 1
 -4 -16 -1 700 79 1
 -4 -16 -1 584 60 1
 4 -16 1 519 68 1
 -4 16 -1 663 49 1
 4 16 1 829 66 1
 -5 -16 -1 670 83 1
 5 -16 1 679 74 1
 -5 -16 -1 736 72 1
 -5 16 -1 723 58 1
 -5 16 -1 592 65 1
 5 16 1 669 69 1
 6 -16 1 3105 163 1
 -6 -16 -1 3224 152 1
 -6 -16 -1 3540 179 1
 -6 16 -1 2984 151 1
 6 16 1 3044 150 1
 -6 16 -1 2835 142 1
 -7 -16 -1 383 64 1
 -7 -16 -1 357 50 1
 7 -16 1 351 56 1
 7 16 1 446 55 1
 -7 16 -1 373 50 1
 -7 16 -1 334 51 1
 8 -16 1 181 46 1
 -8 -16 -1 129 42 1
 -8 -16 -1 84 51 1
 -8 16 -1 133 41 1
 -8 16 -1 172 42 1
 8 16 1 139 39 1
 -9 -16 -1 155 47 1
 9 -16 1 251 53 1
 -9 -16 -1 184 64 1
 -9 16 -1 211 53 1
 9 16 1 213 47 1
 10 -16 1 231 51 1
 -10 -16 -1 198 60 1
 -10 -16 -1 201 51 1
 -10 16 -1 221 53 1
 -11 -16 -1 3652 214 1
 -11 -16 -1 3878 193 1
 -11 16 -1 4117 192 1
 -12 -16 -1 428 89 1
 -12 -16 -1 536 80 1
 -12 16 -1 564 73 1
 -13 -16 -1 683 83 1
 -13 -16 -1 748 109 1
 -13 16 -1 732 91 1
 -14 -16 -1 301 81 1
 -14 16 -1 665 92 1
 -14 -17 1 484 83 1
 -14 -17 1 421 98 1
 -14 17 1 608 85 1
 -13 -17 1 641 106 1
 -13 -17 1 644 93 1
 -13 17 1 503 79 1
 -12 -17 1 578 79 1
 -12 -17 1 408 92 1
 -12 17 1 385 65 1
 -11 -17 1 230 58 1
 -11 -17 1 122 62 1
 -11 17 1 204 56 1
 -10 -17 1 792 96 1
 -10 -17 1 855 86 1
 -10 17 1 885 86 1
 -10 17 1 728 80 1
 -9 -17 1 6337 281 1
 -9 -17 1 6981 311 1
 9 -17 -1 6668 281 1
 -9 17 1 6241 279 1
 -9 17 1 6446 276 1
 -8 -17 1 1067 103 1
 -8 -17 1 1060 83 1
 8 -17 -1 862 82 1
 -8 17 1 774 78 1
 -8 17 1 955 85 1
 7 -17 -1 131 42 1
 -7 -17 1 220 52 1
 -7 -17 1 135 44 1
 7 17 -1 98 35 1
 -7 17 1 104 40 1
 -7 17 1 131 41 1
 6 -17 -1 4654 223 1
 -6 -17 1 5005 219 1
 -6 -17 1 4475 231 1
 6 17 -1 5165 216 1
 -6 17 1 4946 215 1
 -6 17 1 4797 211 1
 5 -17 -1 1185 92 1
 -5 -17 1 1190 84 1
 -5 -17 1 1203 97 1
 -5 17 1 1114 79 1
 -5 17 1 1012 78 1
 5 17 -1 998 79 1
 -4 -17 1 267 52 1
 4 17 -1 279 48 1
 -4 17 1 164 38 1
 -4 17 1 201 40 1
 -4 17 1 291 57 1
 -3 -17 1 3305 165 1
 -3 17 1 3262 149 1
 3 17 -1 3245 162 1
 -3 17 1 3065 172 1
 2 -17 -1 412 47 1
 -2 -17 1 400 53 1
 -2 17 1 447 65 1
 2 17 -1 553 66 1
 1 -17 -1 1201 77 1
 -1 -17 1 1352 81 1
 -1 17 1 1245 100 1
 1 17 -1 1241 95 1
 0 -17 -1 33451 1202 1
 0 -17 1 33585 1193 1
 0 17 1 33593 1218 1
 0 17 -1 32060 1216 1
 -1 -17 -1 11662 428 1
 1 -17 1 12029 410 1
 1 17 1 9497 428 1
 -1 17 -1 9762 434 1
 2 -17 1 3501 138 1
 -2 -17 -1 3211 161 1
 -2 17 -1 2832 167 1
 2 17 1 3115 162 1
 3 -17 1 637 74 1
 -3 -17 -1 727 77 1
 3 17 1 665 68 1
 4 -17 1 156 46 1
 -4 -17 -1 117 34 1
 -4 -17 -1 57 39 1
 -4 17 -1 102 27 1
 4 17 1 89 38 1
 -5 -17 -1 452 53 1
 5 -17 1 424 61 1
 -5 -17 -1 433 65 1
 -5 17 -1 460 55 1
 -5 17 -1 558 50 1
 5 17 1 561 61 1
 -6 -17 -1 1036 82 1
 6 -17 1 1187 93 1
 -6 -17 -1 1054 103 1
 -6 17 -1 1331 88 1
 -6 17 -1 1316 78 1
 6 17 1 1329 87 1
 7 -17 1 2993 155 1
 -7 -17 -1 3034 164 1
 -7 -17 -1 2735 141 1
 -7 17 -1 2866 145 1
 7 17 1 2789 140 1
 -7 17 -1 2672 132 1
 -8 -17 -1 2746 146 1
 8 -17 1 2698 149 1
 -8 -17 -1 2716 170 1
 -8 17 -1 2896 150 1
 8 17 1 2878 143 1
 9 -17 1 201 49 1
 -9 -17 -1 112 44 1
 -9 -17 -1 6 48 1
 -9 17 -1 109 47 1
 9 17 1 117 41 1
 10 -17 1 128 48 1
 -10 -17 -1 131 58 1
 -10 -17 -1 71 45 1
 -10 17 -1 80 46 1
 -11 -17 -1 1592 144 1
 -11 -17 -1 1664 118 1
 -11 17 -1 1609 110 1
 -12 -17 -1 124 71 1
 -12 -17 -1 77 51 1
 -12 17 -1 92 46 1
 -13 -17 -1 122 74 1
 -13 -17 -1 154 59 1
 -13 17 -1 226 62 1
 -14 -17 -1 439 94 1
 -14 17 -1 413 78 1
 -14 -18 1 335 90 1
 -14 -18 1 553 91 1
 -14 18 1 661 88 1
 -13 -18 1 703 108 1
 -13 -18 1 624 91 1
 -13 18 1 782 93 1
 -12 -18 1 1707 126 1
 -12 -18 1 1751 148 1
 -12 18 1 1840 120 1
 -11 -18 1 1191 102 1
 -11 -18 1 1257 128 1
 -11 18 1 1318 107 1
 -10 -18 1 392 68 1
 -10 -18 1 391 76 1
 -10 18 1 419 63 1
 -9 -18 1 10126 433 1
 -9 -18 1 9500 402 1
 9 -18 -1 10043 409 1
 -9 18 1 9901 404 1
 -9 18 1 9959 394 1
 -8 -18 1 5442 239 1
 -8 -18 1 5008 254 1
 8 -18 -1 5593 240 1
 -8 18 1 5203 233 1
 -8 18 1 5332 232 1
 7 -18 -1 700 78 1
 -7 -18 1 812 91 1
 -7 -18 1 681 78 1
 -7 18 1 820 79 1
 7 18 -1 675 69 1
 -7 18 1 630 72 1
 -6 -18 1 7639 333 1
 6 -18 -1 7911 326 1
 -6 -18 1 7505 309 1
 -6 18 1 7688 305 1
 6 18 -1 7756 313 1
 -6 18 1 7747 311 1
 -5 -18 1 1305 100 1
 5 -18 -1 1249 100 1
 -5 -18 1 1213 90 1
 -5 18 1 1312 86 1
 -5 18 1 1399 88 1
 5 18 -1 1418 93 1
 -4 -18 1 1199 90 1
 -4 18 1 1076 99 1
 4 18 -1 1141 83 1
 -4 18 1 1259 75 1
 -3 -18 1 2928 149 1
 3 18 -1 2482 143 1
 -3 18 1 2647 159 1
 -3 18 1 2624 131 1
 2 -18 -1 1359 80 1
 -2 -18 1 1295 86 1
 2 18 -1 1424 97 1
 -2 18 1 1414 106 1
 -1 -18 1 796 68 1
 1 -18 -1 909 69 1
 -1 18 1 1043 101 1
 1 18 -1 709 81 1
 0 -18 1 3460 156 1
 0 -18 -1 3848 169 1
 0 18 -1 3459 179 1
 0 18 1 3636 181 1
 -1 -18 -1 211 44 1
 1 18 1 272 57 1
 -1 18 -1 280 58 1
 2 -18 1 466 44 1
 -2 -18 -1 422 61 1
 -2 18 -1 685 81 1
 2 18 1 547 68 1
 -3 -18 -1 6435 275 1
 3 -18 1 6147 242 1
 3 -18 1 6231 280 1
 3 18 1 6079 268 1
 -4 -18 -1 501 57 1
 -4 -18 -1 511 71 1
 4 -18 1 567 72 1
 -4 18 -1 516 45 1
 4 18 1 476 62 1
 -5 -18 -1 2346 145 1
 5 -18 1 2325 138 1
 -5 -18 -1 2082 120 1
 -5 18 -1 2365 112 1
 5 18 1 2470 129 1
 -6 -18 -1 694 85 1
 6 -18 1 732 81 1
 -6 -18 -1 908 83 1
 6 18 1 896 76 1
 -6 18 -1 810 78 1
 -6 18 -1 753 65 1
 -7 -18 -1 540 66 1
 7 -18 1 457 66 1
 -7 -18 -1 440 70 1
 7 18 1 715 69 1
 -7 18 -1 547 68 1
 -7 18 -1 643 63 1
 8 -18 1 1010 87 1
 -8 -18 -1 1030 111 1
 -8 -18 -1 1031 93 1
 8 18 1 1076 83 1
 -8 18 -1 869 86 1
 -9 -18 -1 1859 141 1
 9 -18 1 2071 125 1
 -9 -18 -1 2081 124 1
 -9 18 -1 2100 123 1
 -10 -18 -1 27 34 1
 10 -18 1 28 42 1
 -10 -18 -1 0 48 1
 -10 18 -1 0 38 1
 -11 -18 -1 3112 198 1
 -11 -18 -1 3026 170 1
 -11 18 -1 3095 164 1
 -12 -18 -1 234 59 1
 -12 -18 -1 177 77 1
 -12 18 -1 224 55 1
 -13 -18 -1 7 67 1
 -13 -18 -1 14 49 1
 -13 18 -1 0 46 1
 -14 -18 -1 396 93 1
 -14 18 -1 335 66 1
 -14 -19 1 242 76 1
 -14 19 1 439 78 1
 -13 -19 1 372 89 1
 -13 -19 1 273 66 1
 -13 19 1 296 68 1
 -12 -19 1 494 92 1
 -12 19 1 309 61 1
 -11 -19 1 506 79 1
 -11 -19 1 473 87 1
 -11 19 1 502 71 1
 -10 -19 1 9 45 1
 -10 -19 1 16 41 1
 -10 19 1 21 40 1
 -9 -19 1 1373 107 1
 9 -19 -1 1440 106 1
 -9 -19 1 1662 130 1
 -9 19 1 1362 104 1
 -9 19 1 1604 107 1
 8 -19 -1 14453 563 1
 -8 -19 1 14059 580 1
 -8 -19 1 13966 548 1
 -8 19 1 14729 542 1
 -8 19 1 14645 559 1
 -7 -19 1 638 81 1
 -7 -19 1 702 75 1
 7 -19 -1 748 78 1
 -7 19 1 798 74 1
 7 19 -1 835 73 1
 -7 19 1 858 77 1
 6 -19 -1 719 80 1
 -6 -19 1 427 61 1
 -6 -19 1 502 75 1
 -6 19 1 434 56 1
 -6 19 1 571 66 1
 6 19 -1 466 59 1
 -5 -19 1 285 52 1
 -5 -19 1 200 52 1
 5 -19 -1 268 58 1
 -5 19 1 331 54 1
 -5 19 1 234 56 1
 5 19 -1 262 51 1
 -5 19 1 235 44 1
 -4 -19 1 4562 212 1
 -4 19 1 4458 192 1
 -4 19 1 4400 219 1
 4 19 -1 4194 202 1
 -3 -19 1 545 68 1
 -3 19 1 510 72 1
 -3 19 1 620 58 1
 3 19 -1 563 70 1
 -2 -19 1 1076 82 1
 2 -19 -1 1134 74 1
 2 19 -1 983 94 1
 -2 19 1 1037 104 1
 -1 -19 1 7810 327 1
 1 -19 -1 7737 327 1
 1 19 -1 8149 349 1
 -1 19 1 8376 356 1
 0 -19 -1 127 37 1
 0 -19 1 112 32 1
 0 19 -1 83 42 1
 0 19 1 90 47 1
 -1 -19 -1 1561 95 1
 1 -19 1 1528 81 1
 1 19 1 1888 110 1
 -1 19 -1 1634 106 1
 2 -19 1 1315 71 1
 -2 -19 -1 1502 96 1
 2 19 1 1287 95 1
 -2 19 -1 1236 99 1
 3 -19 1 4350 174 1
 3 -19 1 4134 209 1
 -3 -19 -1 4181 200 1
 3 19 1 4573 202 1
 -4 -19 -1 805 87 1
 -4 -19 -1 1177 81 1
 4 -19 1 1080 90 1
 4 19 1 1101 85 1
 -4 19 -1 1176 66 1
 5 -19 1 6997 306 1
 -5 -19 -1 7473 285 1
 -5 -19 -1 7293 313 1
 -5 19 -1 6830 274 1
 5 19 1 6908 292 1
 -6 -19 -1 7855 345 1
 -6 -19 -1 7866 316 1
 6 -19 1 7521 332 1
 6 19 1 7712 322 1
 -6 19 -1 8316 321 1
 -6 19 -1 7695 307 1
 -7 -19 -1 2064 141 1
 7 -19 1 2041 129 1
 -7 -19 -1 1977 119 1
 7 19 1 2048 120 1
 -8 -19 -1 429 63 1
 -8 -19 -1 519 81 1
 8 -19 1 541 71 1
 8 19 1 432 59 1
 -8 19 -1 326 60 1
 -9 -19 -1 74 37 1
 9 -19 1 74 42 1
 -9 -19 -1 0 47 1
 -9 19 -1 29 39 1
 -10 -19 -1 635 79 1
 -10 -19 -1 676 94 1
 10 -19 1 689 80 1
 -10 19 -1 530 74 1
 -11 -19 -1 218 59 1
 -11 -19 -1 239 75 1
 -11 19 -1 150 50 1
 -12 -19 -1 1241 136 1
 -12 -19 -1 1174 107 1
 -12 19 -1 1260 111 1
 -13 -19 -1 120 79 1
 -13 -19 -1 109 59 1
 -13 19 -1 152 54 1
 -13 -20 1 40 61 1
 -13 -20 1 26 51 1
 -13 20 1 25 49 1
 -12 -20 1 512 80 1
 -12 -20 1 577 98 1
 -12 20 1 403 67 1
 -11 -20 1 1600 122 1
 -11 -20 1 1619 142 1
 -11 20 1 1490 110 1
 -10 -20 1 415 67 1
 -10 -20 1 320 70 1
 -10 20 1 492 69 1
 -9 -20 1 133 61 1
 9 -20 -1 108 46 1
 -9 -20 1 87 46 1
 -9 20 1 61 39 1
 8 -20 -1 902 90 1
 -8 -20 1 889 87 1
 -8 -20 1 802 95 1
 -8 20 1 988 83 1
 -8 20 1 1189 92 1
 -7 -20 1 2451 132 1
 -7 -20 1 2136 139 1
 7 -20 -1 2051 129 1
 7 20 -1 2223 123 1
 -7 20 1 2198 122 1
 -7 20 1 2128 121 1
 6 -20 -1 1495 110 1
 -6 -20 1 1399 100 1
 -6 -20 1 1144 106 1
 6 20 -1 1397 95 1
 -6 20 1 1340 91 1
 -6 20 1 1400 95 1
 -5 -20 1 786 80 1
 5 -20 -1 842 86 1
 -5 -20 1 682 76 1
 5 20 -1 609 67 1
 -5 20 1 695 65 1
 -5 20 1 620 79 1
 -4 -20 1 1112 91 1
 -4 20 1 1108 75 1
 4 20 -1 969 85 1
 -4 20 1 1044 102 1
 -3 -20 1 1781 111 1
 -3 20 1 1790 96 1
 -3 20 1 2082 131 1
 3 20 -1 1658 110 1
 -2 -20 1 3019 156 1
 2 -20 -1 2965 147 1
 -2 20 1 2971 177 1
 2 20 -1 3144 168 1
 -1 -20 1 2103 112 1
 1 -20 -1 2194 112 1
 1 20 -1 2081 131 1
 -1 20 1 2309 137 1
 0 -20 -1 238 44 1
 0 -20 1 208 37 1
 0 20 -1 129 49 1
 0 20 1 143 45 1
 1 -20 1 8105 308 1
 -1 -20 -1 7738 324 1
 -1 20 -1 7482 341 1
 1 20 1 7334 334 1
 2 -20 1 879 61 1
 -2 -20 -1 932 80 1
 2 20 1 997 82 1
 -2 20 -1 1050 90 1
 3 -20 1 1772 85 1
 3 -20 1 1646 118 1
 -3 -20 -1 1621 108 1
 3 20 1 1500 106 1
 -3 20 -1 1567 114 1
 -4 -20 -1 492 69 1
 4 -20 1 430 69 1
 -4 -20 -1 351 51 1
 -4 20 -1 388 40 1
 4 20 1 425 61 1
 -5 -20 -1 13635 553 1
 -5 -20 -1 13854 517 1
 5 -20 1 13826 551 1
 -5 20 -1 14356 516 1
 5 20 1 13695 538 1
 -6 -20 -1 14945 557 1
 -6 -20 -1 15383 601 1
 6 -20 1 15251 592 1
 -6 20 -1 15415 561 1
 6 20 1 15501 579 1
 -7 -20 -1 1842 109 1
 -7 -20 -1 1780 128 1
 7 -20 1 1835 121 1
 -7 20 -1 1738 111 1
 7 20 1 1470 103 1
 -8 -20 -1 5968 270 1
 8 -20 1 5720 256 1
 -8 -20 -1 5354 240 1
 8 20 1 5699 245 1
 -8 20 -1 5286 241 1
 -9 -20 -1 3559 191 1
 9 -20 1 3464 175 1
 -9 -20 -1 3301 169 1
 -9 20 -1 3402 173 1
 10 -20 1 944 92 1
 -10 -20 -1 985 114 1
 -10 -20 -1 951 91 1
 -10 20 -1 744 84 1
 -11 -20 -1 2663 153 1
 -11 -20 -1 2874 182 1
 -11 20 -1 3149 159 1
 -12 -20 -1 1894 133 1
 -12 -20 -1 1825 145 1
 -12 20 -1 1891 130 1
 -13 -20 -1 344 73 1
 -13 -20 -1 147 73 1
 -13 20 -1 267 61 1
 -13 -21 1 165 80 1
 -13 -21 1 68 56 1
 -13 21 1 141 59 1
 -12 -21 1 828 87 1
 -12 -21 1 557 88 1
 -12 21 1 743 81 1
 -11 -21 1 335 66 1
 -11 -21 1 429 89 1
 -11 21 1 353 66 1
 -10 -21 1 53 59 1
 -10 -21 1 91 51 1
 -10 21 1 98 42 1
 9 -21 -1 6130 277 1
 -9 -21 1 5850 295 1
 -9 -21 1 6124 274 1
 -9 21 1 6306 268 1
 -8 -21 1 744 91 1
 -8 -21 1 724 84 1
 8 -21 -1 740 80 1
 -8 21 1 566 74 1
 -8 21 1 776 77 1
 7 -21 -1 1479 111 1
 -7 -21 1 1317 104 1
 -7 -21 1 1506 120 1
 -7 21 1 1689 106 1
 -7 21 1 1493 98 1
 7 21 -1 1583 100 1
 -6 -21 1 3328 160 1
 6 -21 -1 3289 171 1
 -6 -21 1 2842 167 1
 -6 21 1 3371 156 1
 -6 21 1 3431 153 1
 6 21 -1 3523 161 1
 -5 -21 1 439 66 1
 5 -21 -1 337 63 1
 -5 -21 1 389 61 1
 5 21 -1 275 52 1
 -5 21 1 212 54 1
 -5 21 1 342 48 1
 -4 -21 1 798 81 1
 4 21 -1 979 88 1
 -4 21 1 1075 106 1
 -4 21 1 1072 74 1
 3 -21 -1 660 63 1
 -3 -21 1 666 76 1
 -3 21 1 762 96 1
 3 21 -1 865 89 1
 -2 -21 1 444 60 1
 2 -21 -1 469 53 1
 2 21 -1 487 68 1
 -2 21 1 430 74 1
 1 -21 -1 565 58 1
 -1 -21 1 567 60 1
 -1 21 1 565 77 1
 1 21 -1 596 77 1
 0 -21 1 2254 119 1
 0 -21 -1 2219 123 1
 0 21 1 2315 146 1
 0 21 -1 2477 148 1
 -1 -21 -1 1193 88 1
 1 -21 1 1122 74 1
 1 21 1 1162 99 1
 -1 21 -1 1090 107 1
 2 -21 1 3597 152 1
 -2 -21 -1 3489 175 1
 -2 21 -1 3477 188 1
 2 21 1 3524 180 1
 -3 -21 -1 712 77 1
 3 -21 1 789 54 1
 3 -21 1 850 92 1
 -3 21 -1 843 92 1
 3 21 1 658 75 1
 -4 -21 -1 7573 315 1
 4 -21 1 7276 318 1
 -4 -21 -1 7732 292 1
 4 -21 1 6529 276 1
 4 21 1 7304 304 1
 5 -21 1 13904 570 1
 -5 -21 -1 14436 575 1
 -5 -21 -1 14386 537 1
 -5 21 -1 14813 536 1
 5 21 1 14266 560 1
 6 -21 1 2192 138 1
 -6 -21 -1 2136 144 1
 -6 -21 -1 2121 124 1
 6 21 1 2271 128 1
 -7 -21 -1 833 97 1
 7 -21 1 1115 104 1
 -7 -21 -1 1023 83 1
 7 21 1 1309 91 1
 -7 21 -1 1041 84 1
 8 -21 1 1404 108 1
 -8 -21 -1 1348 120 1
 -8 -21 -1 1288 98 1
 -8 21 -1 1464 104 1
 8 21 1 1324 97 1
 9 -21 1 76 45 1
 -9 -21 -1 39 42 1
 -9 -21 -1 32 51 1
 -9 21 -1 55 41 1
 -10 -21 -1 607 88 1
 10 -21 1 653 76 1
 -10 -21 -1 609 76 1
 -10 21 -1 540 71 1
 -11 -21 -1 350 67 1
 -11 -21 -1 167 71 1
 -11 21 -1 335 58 1
 -12 -21 -1 220 81 1
 -12 -21 -1 83 55 1
 -12 21 -1 235 62 1
 -13 -21 -1 445 97 1
 -13 -21 -1 578 87 1
 -13 21 -1 578 84 1
 -13 -22 1 441 84 1
 -13 22 1 555 79 1
 -12 -22 1 811 108 1
 -12 -22 1 634 88 1
 -12 22 1 503 73 1
 -11 -22 1 33 47 1
 -11 -22 1 0 50 1
 -11 22 1 0 43 1
 -10 -22 1 1645 114 1
 -10 -22 1 1700 138 1
 -10 22 1 1778 118 1
 9 -22 -1 202 53 1
 -9 -22 1 176 59 1
 -9 -22 1 190 53 1
 -8 -22 1 808 82 1
 8 -22 -1 856 89 1
 -8 -22 1 942 104 1
 -8 22 1 658 74 1
 -7 -22 1 807 101 1
 7 -22 -1 1042 102 1
 -7 -22 1 1173 93 1
 7 22 -1 931 82 1
 -7 22 1 836 76 1
 -7 22 1 999 91 1
 6 -22 -1 1159 97 1
 -6 -22 1 980 99 1
 -6 -22 1 1093 99 1
 -6 22 1 783 75 1
 6 22 -1 709 79 1
 -5 -22 1 1115 99 1
 -5 -22 1 1038 105 1
 -5 22 1 1151 111 1
 5 22 -1 1160 93 1
 -5 22 1 1258 82 1
 -4 -22 1 56 42 1
 -4 22 1 72 31 1
 -4 22 1 40 43 1
 4 22 -1 69 41 1
 -3 -22 1 596 70 1
 3 -22 -1 742 62 1
 -3 22 1 549 81 1
 3 22 -1 646 74 1
 2 -22 -1 790 70 1
 -2 -22 1 773 76 1
 2 22 -1 1070 96 1
 -2 22 1 1072 106 1
 1 -22 -1 454 58 1
 -1 -22 1 432 56 1
 -1 22 1 317 64 1
 1 22 -1 275 64 1
 0 -22 1 4859 203 1
 0 -22 -1 5044 214 1
 0 22 1 4601 229 1
 0 22 -1 4540 230 1
 -1 -22 -1 28 34 1
 1 -22 1 35 27 1
 -1 22 -1 122 46 1
 1 22 1 211 52 1
 2 -22 1 75 28 1
 -2 -22 -1 44 38 1
 2 22 1 230 56 1
 -2 22 -1 154 55 1
 -3 -22 -1 1491 104 1
 3 -22 1 1325 76 1
 3 22 1 1321 101 1
 -3 22 -1 1379 111 1
 -4 -22 -1 10393 431 1
 4 -22 1 10362 394 1
 4 -22 1 10592 436 1
 4 22 1 10619 425 1
 -5 -22 -1 4657 236 1
 5 -22 1 4914 234 1
 -5 -22 -1 4927 214 1
 5 22 1 5045 224 1
 -5 22 -1 4918 200 1
 -6 -22 -1 1374 121 1
 6 -22 1 1335 106 1
 -6 -22 -1 1253 92 1
 6 22 1 1433 97 1
 7 -22 1 2263 143 1
 -7 -22 -1 2287 131 1
 -7 -22 -1 2450 155 1
 7 22 1 2380 132 1
 8 -22 1 675 79 1
 -8 -22 -1 602 73 1
 -8 -22 -1 485 82 1
 8 22 1 524 66 1
 -8 22 -1 453 67 1
 -9 -22 -1 43 38 1
 -9 -22 -1 57 55 1
 9 -22 1 1 41 1
 -9 22 -1 42 38 1
 10 -22 1 0 40 1
 -10 -22 -1 13 56 1
 -10 -22 -1 0 35 1
 -10 22 -1 0 43 1
 -11 -22 -1 17 44 1
 -11 -22 -1 0 57 1
 -11 22 -1 65 43 1
 -12 -22 -1 95 72 1
 -12 -22 -1 22 45 1
 -12 22 -1 85 54 1
 -13 -22 -1 989 110 1
 -13 -22 -1 888 126 1
 -13 22 -1 909 103 1
 -13 -23 1 604 107 1
 -13 23 1 973 100 1
 -12 -23 1 801 116 1
 -12 -23 1 956 108 1
 -12 23 1 871 92 1
 -11 -23 1 144 57 1
 -11 -23 1 203 72 1
 -11 23 1 187 58 1
 -10 -23 1 220 63 1
 -10 -23 1 319 71 1
 -10 23 1 289 61 1
 -9 -23 1 1301 123 1
 9 -23 -1 1119 96 1
 -9 -23 1 1140 108 1
 -9 23 1 1076 90 1
 8 -23 -1 1425 109 1
 -8 -23 1 1428 106 1
 -8 -23 1 1510 121 1
 -8 23 1 1271 99 1
 -7 -23 1 180 58 1
 7 -23 -1 264 59 1
 -7 -23 1 212 52 1
 -7 23 1 130 44 1
 -7 23 1 140 41 1
 7 23 -1 162 46 1
 -6 -23 1 273 54 1
 6 -23 -1 321 65 1
 -6 -23 1 397 72 1
 6 23 -1 335 58 1
 -6 23 1 304 50 1
 -5 -23 1 5023 224 1
 -5 -23 1 5103 237 1
 -5 23 1 4785 243 1
 -5 23 1 4693 208 1
 5 23 -1 4699 225 1
 -4 -23 1 1335 106 1
 -4 23 1 1468 89 1
 4 23 -1 1316 105 1
 -4 23 1 1316 117 1
 3 -23 -1 275 46 1
 -3 -23 1 186 49 1
 -3 23 1 290 66 1
 3 23 -1 216 54 1
 -2 -23 1 1030 85 1
 2 -23 -1 1008 75 1
 -2 23 1 1435 111 1
 2 23 -1 1109 98 1
 -1 -23 1 9629 395 1
 1 -23 -1 9269 395 1
 -1 23 1 10797 432 1
 1 23 -1 10183 421 1
 0 -23 -1 7635 321 1
 0 -23 1 7526 312 1
 0 23 -1 7471 342 1
 0 23 1 7457 342 1
 -1 -23 -1 5069 225 1
 1 -23 1 5214 209 1
 -1 23 -1 4838 240 1
 1 23 1 4734 237 1
 2 -23 1 1697 89 1
 -2 -23 -1 1622 108 1
 2 23 1 1577 114 1
 -2 23 -1 1692 125 1
 -3 -23 -1 943 84 1
 3 -23 1 1019 66 1
 -3 23 -1 1223 113 1
 3 23 1 1079 91 1
 4 -23 1 4693 185 1
 -4 -23 -1 4228 214 1
 4 -23 1 4504 225 1
 4 23 1 4360 212 1
 -5 -23 -1 4373 200 1
 5 -23 1 4413 223 1
 -5 -23 -1 4309 218 1
 5 23 1 4367 208 1
 -6 -23 -1 2595 138 1
 6 -23 1 2385 149 1
 -6 -23 -1 2427 156 1
 6 23 1 2391 141 1
 -7 -23 -1 3250 185 1
 -7 -23 -1 3353 170 1
 7 -23 1 3488 184 1
 7 23 1 3258 169 1
 -8 -23 -1 1468 102 1
 -8 -23 -1 1427 121 1
 8 -23 1 1379 110 1
 8 23 1 1494 100 1
 9 -23 1 43 42 1
 -9 -23 -1 50 41 1
 -9 -23 -1 51 49 1
 -9 23 -1 17 41 1
 -10 -23 -1 33 60 1
 -10 -23 -1 106 51 1
 -10 23 -1 98 50 1
 -11 -23 -1 135 51 1
 -11 -23 -1 124 63 1
 -11 23 -1 118 48 1
 -12 -23 -1 1584 123 1
 -12 -23 -1 1657 141 1
 -12 23 -1 1790 127 1
 -13 -23 -1 1588 138 1
 -13 -23 -1 1538 137 1
 -13 23 -1 1797 130 1
 -13 -24 1 138 64 1
 -13 -24 1 181 80 1
 -13 24 1 166 63 1
 -12 -24 1 678 92 1
 -12 -24 1 533 90 1
 -12 24 1 621 82 1
 -11 -24 1 763 90 1
 -11 -24 1 867 110 1
 -11 24 1 520 78 1
 -10 -24 1 358 81 1
 -10 -24 1 469 74 1
 -10 24 1 415 68 1
 -9 -24 1 270 75 1
 -9 -24 1 407 69 1
 9 -24 -1 406 68 1
 -9 24 1 409 67 1
 -8 -24 1 85 48 1
 -8 -24 1 182 52 1
 8 -24 -1 146 52 1
 -8 24 1 142 44 1
 -7 -24 1 1250 98 1
 7 -24 -1 1141 101 1
 -7 -24 1 986 102 1
 -7 24 1 1017 83 1
 7 24 -1 1103 91 1
 -6 -24 1 879 91 1
 6 -24 -1 819 93 1
 -6 -24 1 798 93 1
 6 24 -1 834 87 1
 -6 24 1 801 71 1
 -5 -24 1 2406 152 1
 -5 24 1 2459 131 1
 5 24 -1 2463 145 1
 -5 24 1 2269 158 1
 -4 -24 1 2600 147 1
 4 -24 -1 2561 127 1
 -4 24 1 2302 156 1
 4 24 -1 2389 141 1
 -4 24 1 2213 120 1
 3 -24 -1 433 53 1
 -3 -24 1 492 68 1
 3 24 -1 326 62 1
 -3 24 1 460 77 1
 2 -24 -1 1328 86 1
 -2 -24 1 1130 91 1
 -2 24 1 1318 127 1
 2 24 -1 1221 104 1
 -1 -24 1 2013 115 1
 1 -24 -1 2151 117 1
 -1 24 1 2211 146 1
 1 24 -1 2104 138 1
 0 -24 1 99 35 1
 0 -24 -1 126 41 1
 0 24 -1 109 49 1
 0 24 1 171 55 1
 -1 -24 -1 1920 119 1
 1 -24 1 1919 106 1
 -1 24 -1 1871 134 1
 1 24 1 2231 140 1
 -2 -24 -1 8460 381 1
 2 -24 1 9379 361 1
 2 24 1 9468 396 1
 -2 24 -1 9429 405 1
 3 -24 1 337 43 1
 -3 -24 -1 364 62 1
 -3 24 -1 311 66 1
 3 24 1 284 55 1
 4 -24 1 382 43 1
 4 -24 1 427 74 1
 -4 -24 -1 259 58 1
 4 24 1 431 67 1
 -5 -24 -1 12843 540 1
 -5 -24 -1 13410 509 1
 5 -24 1 13891 546 1
 5 24 1 12746 528 1
 6 -24 1 3987 206 1
 -6 -24 -1 3812 204 1
 -6 -24 -1 3758 185 1
 6 24 1 3944 194 1
 -7 -24 -1 277 69 1
 -7 -24 -1 244 52 1
 7 -24 1 163 53 1
 7 24 1 351 60 1
 -8 -24 -1 1675 118 1
 8 -24 1 1468 120 1
 -8 -24 -1 1585 132 1
 8 24 1 1578 116 1
 -9 -24 -1 1240 100 1
 -9 -24 -1 1352 128 1
 9 -24 1 1319 105 1
 -10 -24 -1 1246 111 1
 10 -24 1 1245 114 1
 -10 -24 -1 940 111 1
 -10 24 -1 1243 105 1
 -11 -24 -1 1 60 1
 -11 -24 -1 29 44 1
 -11 24 -1 25 42 1
 -12 -24 -1 1967 139 1
 -12 -24 -1 2073 167 1
 -12 24 -1 2094 143 1
 -13 -24 -1 822 102 1
 -13 -24 -1 1016 127 1
 -13 24 -1 842 92 1
 -13 -25 1 184 82 1
 -13 -25 1 202 67 1
 -13 25 1 143 54 1
 -12 -25 1 1104 135 1
 -12 -25 1 1123 117 1
 -12 25 1 1104 105 1
 -11 -25 1 764 90 1
 -11 -25 1 817 106 1
 -11 25 1 918 95 1
 -10 -25 1 959 105 1
 -10 -25 1 1028 120 1
 -10 25 1 1161 94 1
 9 -25 -1 3897 207 1
 -9 -25 1 4110 226 1
 -9 -25 1 4165 204 1
 -9 25 1 4184 199 1
 8 -25 -1 1506 113 1
 -8 -25 1 1570 109 1
 -8 -25 1 1599 128 1
 -8 25 1 1412 103 1
 -7 -25 1 3201 173 1
 7 -25 -1 3328 182 1
 -7 -25 1 3335 189 1
 7 25 -1 3317 170 1
 -6 -25 1 1351 116 1
 -6 -25 1 1360 108 1
 6 -25 -1 1341 117 1
 6 25 -1 1578 109 1
 -6 25 1 1452 94 1
 -5 -25 1 509 75 1
 5 25 -1 421 67 1
 -5 25 1 556 85 1
 -5 25 1 465 57 1
 -4 -25 1 637 81 1
 4 -25 -1 557 63 1
 4 25 -1 668 80 1
 -4 25 1 650 90 1
 3 -25 -1 111 37 1
 -3 -25 1 82 45 1
 3 25 -1 115 50 1
 -3 25 1 93 49 1
 2 -25 -1 434 55 1
 -2 -25 1 512 66 1
 2 25 -1 481 76 1
 -2 25 1 541 80 1
 -1 -25 1 1603 101 1
 1 -25 -1 1604 99 1
 1 25 -1 1837 125 1
 -1 25 1 1552 125 1
 0 -25 1 766 67 1
 0 -25 -1 693 71 1
 0 25 1 632 85 1
 0 25 -1 822 93 1
 -1 -25 -1 473 62 1
 1 -25 1 608 57 1
 1 25 1 548 73 1
 -1 25 -1 447 69 1
 2 -25 1 4866 204 1
 -2 -25 -1 4671 224 1
 -2 25 -1 4960 246 1
 2 25 1 4642 232 1
 -3 -25 -1 373 62 1
 3 -25 1 418 46 1
 3 25 1 292 56 1
 -3 25 -1 442 78 1
 4 -25 1 5580 273 1
 4 -25 1 5563 231 1
 -4 -25 -1 5556 266 1
 4 25 1 6145 266 1
 -5 -25 -1 13906 529 1
 -5 -25 -1 13771 564 1
 5 -25 1 14131 567 1
 5 25 1 14258 554 1
 6 -25 1 332 66 1
 -6 -25 -1 276 53 1
 -6 -25 -1 412 73 1
 6 25 1 328 59 1
 -7 -25 -1 509 69 1
 7 -25 1 502 77 1
 -7 -25 -1 351 73 1
 7 25 1 589 73 1
 -8 -25 -1 1027 113 1
 -8 -25 -1 948 94 1
 8 -25 1 1074 109 1
 8 25 1 847 89 1
 -9 -25 -1 99 45 1
 9 -25 1 39 49 1
 -9 -25 -1 153 63 1
 -10 -25 -1 440 68 1
 -10 -25 -1 522 96 1
 10 -25 1 592 84 1
 -11 -25 -1 35 49 1
 -11 -25 -1 103 67 1
 -11 25 -1 9 41 1
 -12 -25 -1 1613 129 1
 -12 -25 -1 1646 156 1
 -12 25 -1 2068 138 1
 -13 -25 -1 1577 160 1
 -13 -25 -1 1840 140 1
 -13 25 -1 1888 138 1
 -13 -26 1 1629 153 1
 -13 26 1 1638 131 1
 -12 -26 1 1029 126 1
 -12 -26 1 1211 121 1
 -12 26 1 1157 110 1
 -11 -26 1 283 62 1
 -11 -26 1 455 96 1
 -11 26 1 438 71 1
 -10 -26 1 1777 133 1
 -10 -26 1 2016 153 1
 -10 26 1 2070 131 1
 9 -26 -1 3144 169 1
 -9 -26 1 2640 159 1
 -9 -26 1 2886 182 1
 -9 26 1 2903 157 1
 8 -26 -1 995 101 1
 -8 -26 1 841 95 1
 -8 -26 1 838 100 1
 -7 -26 1 803 86 1
 -7 -26 1 742 91 1
 7 -26 -1 1055 106 1
 7 26 -1 897 90 1
 -6 -26 1 2397 137 1
 -6 -26 1 2407 146 1
 6 -26 -1 2232 143 1
 6 26 -1 2201 130 1
 -6 26 1 2127 115 1
 -5 -26 1 882 95 1
 -5 26 1 816 70 1
 5 26 -1 964 92 1
 -5 26 1 800 96 1
 4 -26 -1 176 42 1
 -4 -26 1 135 52 1
 -4 26 1 91 50 1
 4 26 -1 178 55 1
 3 -26 -1 1913 109 1
 -3 -26 1 1807 121 1
 3 26 -1 1978 129 1
 -3 26 1 1985 143 1
 2 -26 -1 150 39 1
 -2 -26 1 62 41 1
 2 26 -1 141 55 1
 -2 26 1 262 70 1
 1 -26 -1 387 58 1
 -1 -26 1 376 57 1
 -1 26 1 498 86 1
 1 26 -1 409 70 1
 0 -26 -1 524 64 1
 0 -26 1 560 60 1
 0 26 1 669 88 1
 0 26 -1 590 77 1
 1 -26 1 12195 472 1
 -1 -26 -1 12323 488 1
 -1 26 -1 12149 512 1
 1 26 1 11577 505 1
 -2 -26 -1 282 57 1
 2 -26 1 244 41 1
 2 26 1 217 55 1
 -2 26 -1 126 55 1
 3 -26 1 135 33 1
 -3 -26 -1 38 43 1
 -3 26 -1 54 46 1
 3 26 1 111 44 1
 4 -26 1 5401 254 1
 -4 -26 -1 4907 240 1
 4 26 1 4965 236 1
 -5 -26 -1 3427 191 1
 -5 -26 -1 3628 173 1
 5 -26 1 3142 184 1
 5 26 1 3339 179 1
 6 -26 1 438 76 1
 -6 -26 -1 403 64 1
 -6 -26 -1 474 84 1
 6 26 1 453 70 1
 -7 -26 -1 1070 87 1
 7 -26 1 960 104 1
 -7 -26 -1 734 95 1
 7 26 1 962 93 1
 8 -26 1 227 63 1
 -8 -26 -1 101 44 1
 -8 -26 -1 58 49 1
 8 26 1 67 46 1
 -9 -26 -1 426 72 1
 9 -26 1 521 81 1
 -9 -26 -1 473 87 1
 -10 -26 -1 175 69 1
 -10 -26 -1 126 50 1
 10 -26 1 177 58 1
 -11 -26 -1 845 101 1
 -11 -26 -1 978 121 1
 -12 -26 -1 1065 126 1
 -12 -26 -1 843 101 1
 -12 26 -1 792 89 1
 -13 -26 -1 778 121 1
 -13 26 -1 885 100 1
 -12 -27 1 302 71 1
 -12 -27 1 153 80 1
 -12 27 1 234 59 1
 -11 -27 1 69 64 1
 -11 -27 1 86 48 1
 -11 27 1 7 41 1
 -10 -27 1 4090 221 1
 -10 -27 1 3607 196 1
 -10 27 1 3831 191 1
 9 -27 -1 4869 233 1
 -9 -27 1 4247 242 1
 -9 -27 1 4616 228 1
 -8 -27 1 322 66 1
 -8 -27 1 352 77 1
 8 -27 -1 286 66 1
 -7 -27 1 1018 102 1
 7 -27 -1 926 106 1
 -7 -27 1 971 110 1
 7 27 -1 990 99 1
 -6 -27 1 95 52 1
 -6 -27 1 124 48 1
 6 -27 -1 83 51 1
 6 27 -1 133 48 1
 -5 -27 1 16 42 1
 -5 27 1 37 32 1
 -5 27 1 0 44 1
 5 27 -1 99 48 1
 -4 -27 1 470 71 1
 4 -27 -1 548 60 1
 -4 27 1 372 72 1
 4 27 -1 426 69 1
 -3 -27 1 827 85 1
 3 -27 -1 747 70 1
 3 27 -1 465 71 1
 -3 27 1 693 97 1
 2 -27 -1 467 58 1
 -2 -27 1 475 65 1
 -2 27 1 504 81 1
 2 27 -1 533 80 1
 1 -27 -1 620 67 1
 -1 -27 1 601 67 1
 -1 27 1 734 92 1
 1 27 -1 902 98 1
 0 -27 1 1087 82 1
 0 -27 -1 1015 84 1
 0 27 1 1112 113 1
 0 27 -1 1218 115 1
 -1 -27 -1 11155 447 1
 1 -27 1 11328 430 1
 -1 27 -1 11391 474 1
 1 27 1 11150 465 1
 -2 -27 -1 5058 241 1
 2 -27 1 5267 220 1
 2 27 1 5405 256 1
 -2 27 -1 5370 265 1
 3 -27 1 107 34 1
 -3 -27 -1 72 44 1
 -3 27 -1 142 52 1
 3 27 1 86 46 1
 4 -27 1 5850 271 1
 -4 -27 -1 5382 254 1
 4 27 1 5339 252 1
 -5 -27 -1 1337 119 1
 -5 -27 -1 1469 106 1
 5 -27 1 1371 120 1
 5 27 1 1398 112 1
 6 -27 1 125 52 1
 -6 -27 -1 140 60 1
 -6 -27 -1 220 52 1
 6 27 1 259 58 1
 7 -27 1 3368 185 1
 -7 -27 -1 3080 163 1
 -7 -27 -1 3369 191 1
 7 27 1 2981 169 1
 -8 -27 -1 92 60 1
 -8 -27 -1 87 48 1
 8 -27 1 166 61 1
 8 27 1 126 51 1
 -9 -27 -1 46 44 1
 -9 -27 -1 69 60 1
 9 -27 1 1 43 1
 10 -27 1 1442 128 1
 -10 -27 -1 1134 110 1
 -10 -27 -1 1359 136 1
 -11 -27 -1 115 64 1
 -11 -27 -1 164 59 1
 -12 -27 -1 1805 137 1
 -12 -27 -1 1850 149 1
 -12 -28 1 206 74 1
 -12 -28 1 184 67 1
 -12 28 1 314 64 1
 -11 -28 1 42 46 1
 -11 -28 1 0 64 1
 -11 28 1 0 37 1
 -10 -28 1 257 75 1
 -10 -28 1 327 65 1
 -9 -28 1 2037 140 1
 9 -28 -1 1913 134 1
 -9 -28 1 1826 148 1
 -8 -28 1 303 64 1
 -8 -28 1 236 64 1
 8 -28 -1 182 60 1
 7 -28 -1 3026 175 1
 -7 -28 1 2894 164 1
 -7 -28 1 2992 176 1
 7 28 -1 2867 160 1
 -6 -28 1 28 42 1
 -6 -28 1 0 41 1
 6 -28 -1 38 48 1
 6 28 -1 56 46 1
 -5 -28 1 141 54 1
 5 -28 -1 117 39 1
 5 28 -1 180 51 1
 -5 28 1 239 65 1
 -4 -28 1 574 77 1
 4 -28 -1 624 62 1
 -4 28 1 491 79 1
 4 28 -1 661 81 1
 -3 -28 1 427 68 1
 3 -28 -1 330 51 1
 3 28 -1 249 59 1
 -3 28 1 231 68 1
 -2 -28 1 184 49 1
 2 -28 -1 215 45 1
 -2 28 1 345 74 1
 2 28 -1 313 68 1
 1 -28 -1 820 79 1
 -1 -28 1 906 81 1
 -1 28 1 854 98 1
 1 28 -1 970 104 1
 0 -28 -1 301 55 1
 0 -28 1 326 49 1
 0 28 -1 413 71 1
 0 28 1 443 74 1
 -1 -28 -1 13616 545 1
 1 -28 1 14392 532 1
 1 28 1 14306 567 1
 -1 28 -1 14087 574 1
 2 -28 1 14433 519 1
 -2 -28 -1 13743 542 1
 -2 28 -1 13796 566 1
 2 28 1 13792 554 1
 -3 -28 -1 552 76 1
 3 -28 1 436 56 1
 -3 28 -1 539 89 1
 3 28 1 472 78 1
 -4 -28 -1 2221 142 1
 4 -28 1 2065 146 1
 4 28 1 2271 137 1
 -5 -28 -1 1455 109 1
 -5 -28 -1 1704 130 1
 5 -28 1 1698 130 1
 5 28 1 1743 118 1
 6 -28 1 405 75 1
 -6 -28 -1 352 73 1
 -6 -28 -1 465 67 1
 6 28 1 356 63 1
 -7 -28 -1 704 83 1
 -7 -28 -1 554 90 1
 7 -28 1 773 97 1
 7 28 1 670 83 1
 -8 -28 -1 362 77 1
 -8 -28 -1 331 61 1
 8 -28 1 350 70 1
 8 28 1 382 66 1
 -9 -28 -1 1 46 1
 9 -28 1 1 49 1
 -9 -28 -1 46 45 1
 10 -28 1 394 74 1
 -10 -28 -1 515 77 1
 -10 -28 -1 407 86 1
 -11 -28 -1 613 87 1
 -11 -28 -1 780 116 1
 -12 -28 -1 1496 150 1
 -12 -28 -1 1375 130 1
 -12 -29 1 133 79 1
 -12 -29 1 97 61 1
 -11 -29 1 137 73 1
 -11 -29 1 135 57 1
 -10 -29 1 317 85 1
 -10 -29 1 429 74 1
 9 -29 -1 200 62 1
 -9 -29 1 132 68 1
 -9 -29 1 143 54 1
 8 -29 -1 15 46 1
 -8 -29 1 24 55 1
 -8 -29 1 14 44 1
 -7 -29 1 1305 116 1
 -7 -29 1 1447 123 1
 7 -29 -1 1481 120 1
 7 29 -1 1209 105 1
 -6 -29 1 424 78 1
 -6 -29 1 441 72 1
 6 -29 -1 564 83 1
 6 29 -1 420 72 1
 -5 -29 1 1470 120 1
 5 -29 -1 1749 103 1
 -5 29 1 1670 136 1
 5 29 -1 1694 121 1
 -4 -29 1 1230 106 1
 4 -29 -1 1250 88 1
 -4 29 1 1586 124 1
 4 29 -1 1380 110 1
 -3 -29 1 1137 96 1
 3 -29 -1 1094 82 1
 3 29 -1 1015 106 1
 -3 29 1 1075 113 1
 -2 -29 1 862 89 1
 2 -29 -1 976 81 1
 2 29 -1 768 98 1
 -2 29 1 1047 114 1
 1 -29 -1 4749 211 1
 -1 -29 1 4426 208 1
 1 29 -1 4553 233 1
 -1 29 1 4273 235 1
 0 -29 -1 139 48 1
 0 -29 1 114 40 1
 0 29 -1 213 63 1
 0 29 1 196 60 1
 -1 -29 -1 2302 141 1
 1 -29 1 2505 129 1
 1 29 1 2357 160 1
 -1 29 -1 2802 171 1
 -2 -29 -1 23196 877 1
 2 -29 1 23756 855 1
 -2 29 -1 22307 899 1
 2 29 1 22774 889 1
 -3 -29 -1 833 94 1
 -3 29 -1 855 110 1
 3 29 1 671 93 1
 4 -29 1 291 66 1
 -4 -29 -1 175 57 1
 4 29 1 211 56 1
 -5 -29 -1 1830 133 1
 -5 -29 -1 1792 116 1
 5 -29 1 1761 131 1
 5 29 1 1429 117 1
 6 -29 1 2017 144 1
 -6 -29 -1 1981 142 1
 -6 -29 -1 1947 123 1
 6 29 1 2136 135 1
 -7 -29 -1 336 61 1
 -7 -29 -1 186 67 1
 7 -29 1 228 62 1
 7 29 1 349 66 1
 -8 -29 -1 582 75 1
 8 -29 1 584 84 1
 -8 -29 -1 406 79 1
 8 29 1 538 77 1
 -9 -29 -1 1089 124 1
 -9 -29 -1 1093 106 1
 9 -29 1 1376 125 1
 -10 -29 -1 781 103 1
 10 -29 1 777 99 1
 -10 -29 -1 766 94 1
 -11 -29 -1 134 55 1
 -11 -29 -1 312 82 1
 -12 -29 -1 1049 124 1
 -12 -30 1 618 102 1
 -12 -30 1 607 92 1
 -11 -30 1 228 81 1
 -11 -30 1 406 77 1
 -10 -30 1 306 82 1
 -10 -30 1 244 65 1
 9 -30 -1 705 93 1
 -9 -30 1 544 89 1
 -9 -30 1 588 88 1
 -8 -30 1 200 61 1
 8 -30 -1 223 65 1
 -8 -30 1 126 65 1
 7 -30 -1 1909 137 1
 -7 -30 1 1806 139 1
 -7 -30 1 1750 122 1
 7 30 -1 1735 123 1
 -6 -30 1 1324 112 1
 -6 -30 1 1382 120 1
 6 -30 -1 1429 123 1
 6 30 -1 1342 114 1
 -5 -30 1 3883 199 1
 -5 30 1 3580 211 1
 5 30 -1 3545 193 1
 -4 -30 1 2933 171 1
 4 -30 -1 2821 150 1
 -4 30 1 2957 190 1
 4 30 -1 2879 171 1
 -3 -30 1 2280 141 1
 3 -30 -1 2441 129 1
 -3 30 1 2330 164 1
 3 30 -1 2415 152 1
 -2 -30 1 424 66 1
 2 -30 -1 515 64 1
 2 30 -1 635 88 1
 -2 30 1 526 84 1
 1 -30 -1 632 72 1
 -1 -30 1 629 72 1
 1 30 -1 727 95 1
 -1 30 1 710 100 1
 0 -30 1 643 64 1
 0 -30 -1 445 65 1
 0 30 -1 612 88 1
 0 30 1 402 73 1
 1 -30 1 9432 375 1
 -1 -30 -1 9079 390 1
 1 30 1 9353 411 1
 -1 30 -1 9739 419 1
 -2 -30 -1 1307 104 1
 2 -30 1 1101 84 1
 -2 30 -1 1012 116 1
 2 30 1 1208 109 1
 -3 -30 -1 337 62 1
 3 30 1 362 65 1
 -3 30 -1 352 75 1
 4 -30 1 1544 130 1
 -4 -30 -1 1689 125 1
 4 30 1 1630 124 1
 -5 -30 -1 101 58 1
 5 -30 1 107 56 1
 -5 -30 -1 38 40 1
 5 30 1 76 50 1
 -6 -30 -1 1032 105 1
 6 -30 1 1067 111 1
 -6 -30 -1 1109 97 1
 6 30 1 1113 102 1
 -7 -30 -1 220 67 1
 7 -30 1 257 65 1
 -7 -30 -1 311 63 1
 7 30 1 281 59 1
 8 -30 1 1075 114 1
 -8 -30 -1 966 107 1
 -8 -30 -1 1092 102 1
 8 30 1 1241 111 1
 -9 -30 -1 3368 204 1
 -9 -30 -1 3106 179 1
 9 -30 1 3390 191 1
 -10 -30 -1 87 65 1
 10 -30 1 47 59 1
 -10 -30 -1 11 46 1
 -11 -30 -1 1597 127 1
 -11 -30 -1 1751 143 1
 -12 -30 -1 614 105 1
 -12 -30 -1 630 92 1
 -12 -31 1 30 56 1
 -12 -31 1 38 71 1
 -11 -31 1 418 83 1
 -11 -31 1 298 86 1
 -10 -31 1 690 100 1
 -10 -31 1 523 88 1
 9 -31 -1 3033 175 1
 -9 -31 1 2758 182 1
 -9 -31 1 2878 176 1
 8 -31 -1 116 60 1
 -8 -31 1 98 57 1
 -8 -31 1 95 52 1
 -7 -31 1 1923 128 1
 -7 -31 1 1549 128 1
 7 -31 -1 1533 126 1
 7 31 -1 1587 120 1
 -6 -31 1 1691 129 1
 6 -31 -1 1584 134 1
 -6 -31 1 1832 138 1
 6 31 -1 1989 132 1
 -5 -31 1 4632 238 1
 -5 31 1 5020 259 1
 5 31 -1 5002 237 1
 4 -31 -1 777 76 1
 -4 -31 1 896 99 1
 4 31 -1 790 91 1
 -4 31 1 759 107 1
 3 -31 -1 3223 161 1
 -3 -31 1 3145 173 1
 -3 31 1 3248 199 1
 3 31 -1 3426 188 1
 -2 -31 1 479 69 1
 2 -31 -1 565 69 1
 2 31 -1 524 85 1
 -2 31 1 602 96 1
 1 -31 -1 2922 155 1
 -1 -31 1 2898 155 1
 -1 31 1 2952 186 1
 1 31 -1 2940 180 1
 0 -31 -1 1439 102 1
 0 -31 1 1304 94 1
 0 31 1 1140 119 1
 0 31 -1 1502 126 1
 1 -31 1 5236 236 1
 -1 -31 -1 5480 254 1
 1 31 1 5451 270 1
 -1 31 -1 5512 278 1
 -2 -31 -1 89 47 1
 -2 31 -1 255 68 1
 2 31 1 179 62 1
 -3 -31 -1 784 90 1
 -3 31 -1 560 92 1
 3 31 1 754 94 1
 4 -31 1 2355 165 1
 -4 -31 -1 2602 159 1
 4 31 1 2190 153 1
 5 -31 1 12 54 1
 -5 -31 -1 183 63 1
 -5 -31 -1 255 55 1
 5 31 1 116 54 1
 -6 -31 -1 134 53 1
 6 -31 1 225 67 1
 -6 -31 -1 169 63 1
 6 31 1 233 61 1
 -7 -31 -1 885 102 1
 -7 -31 -1 1117 102 1
 7 -31 1 1158 118 1
 7 31 1 1003 99 1
 -8 -31 -1 725 99 1
 8 -31 1 902 104 1
 -8 -31 -1 753 85 1
 -9 -31 -1 0 60 1
 9 -31 1 49 53 1
 -9 -31 -1 93 51 1
 -10 -31 -1 425 75 1
 -10 -31 -1 469 93 1
 10 -31 1 321 78 1
 -11 -31 -1 101 71 1
 -11 -31 -1 126 58 1
 -12 -31 -1 599 107 1
 -12 -31 -1 566 88 1
 -12 -32 1 110 60 1
 -12 -32 1 146 82 1
 -11 -32 1 429 89 1
 -11 -32 1 440 82 1
 -10 -32 1 1239 122 1
 -10 -32 1 1158 131 1
 -9 -32 1 6226 287 1
 9 -32 -1 6895 305 1
 -9 -32 1 6199 308 1
 -8 -32 1 350 77 1
 -8 -32 1 257 59 1
 8 -32 -1 216 66 1
 7 -32 -1 684 90 1
 -7 -32 1 445 80 1
 -7 -32 1 671 87 1
 7 32 -1 573 83 1
 -6 -32 1 4501 223 1
 6 -32 -1 3894 220 1
 -6 -32 1 3940 206 1
 6 32 -1 4156 212 1
 -5 -32 1 1734 133 1
 -5 32 1 1671 137 1
 5 32 -1 1599 127 1
 -4 -32 1 937 102 1
 4 32 -1 955 102 1
 -4 32 1 825 113 1
 3 -32 -1 1059 90 1
 -3 -32 1 1403 109 1
 3 32 -1 1416 120 1
 -3 32 1 1437 138 1
 -2 -32 1 361 63 1
 2 -32 -1 531 67 1
 2 32 -1 566 83 1
 -2 32 1 367 77 1
 -1 -32 1 312 56 1
 1 -32 -1 328 58 1
 -1 32 1 290 76 1
 1 32 -1 358 74 1
 0 -32 -1 2188 133 1
 0 -32 1 2243 126 1
 0 32 -1 2083 151 1
 0 32 1 1934 146 1
 1 -32 1 4229 193 1
 -1 -32 -1 4047 203 1
 -1 32 -1 3959 226 1
 1 32 1 4023 222 1
 -2 -32 -1 4906 232 1
 2 32 1 4479 238 1
 -2 32 -1 4884 251 1
 -3 -32 -1 2760 159 1
 3 32 1 2593 166 1
 -3 32 -1 2583 175 1
 4 -32 1 2374 157 1
 -4 -32 -1 2391 155 1
 4 32 1 2264 153 1
 5 -32 1 165 64 1
 -5 -32 -1 266 71 1
 5 32 1 267 65 1
 -6 -32 -1 345 72 1
 6 -32 1 504 84 1
 -6 -32 -1 339 64 1
 6 32 1 248 60 1
 -7 -32 -1 126 60 1
 -7 -32 -1 156 53 1
 7 -32 1 57 57 1
 7 32 1 232 61 1
 -8 -32 -1 1247 129 1
 -8 -32 -1 1129 108 1
 8 -32 1 1167 118 1
 8 32 1 1065 109 1
 -9 -32 -1 115 54 1
 -9 -32 -1 22 61 1
 9 -32 1 90 59 1
 -10 -32 -1 119 55 1
 -10 -32 -1 64 67 1
 10 -32 1 1 56 1
 -11 -32 -1 39 51 1
 -11 -32 -1 0 65 1
 -12 -32 -1 275 87 1
 -11 -33 1 230 82 1
 -11 -33 1 115 64 1
 -10 -33 1 139 59 1
 -10 -33 1 141 74 1
 -9 -33 1 1422 121 1
 9 -33 -1 1388 132 1
 -9 -33 1 1360 135 1
 8 -33 -1 1544 130 1
 -8 -33 1 1837 132 1
 -8 -33 1 1674 149 1
 -7 -33 1 817 97 1
 7 -33 -1 788 103 1
 -7 -33 1 769 100 1
 7 33 -1 869 97 1
 -6 -33 1 992 103 1
 -6 -33 1 959 102 1
 6 -33 -1 736 100 1
 6 33 -1 786 95 1
 -5 -33 1 4933 252 1
 5 33 -1 4695 247 1
 -5 33 1 5236 274 1
 -4 -33 1 1761 126 1
 -4 33 1 1799 145 1
 4 33 -1 1734 130 1
 3 -33 -1 2962 156 1
 -3 -33 1 3118 171 1
 3 33 -1 2810 178 1
 -3 33 1 2913 192 1
 -2 -33 1 4935 244 1
 2 -33 -1 5548 242 1
 -2 33 1 5341 277 1
 2 33 -1 5389 264 1
 -1 -33 1 1722 113 1
 1 -33 -1 1662 113 1
 1 33 -1 1830 133 1
 -1 33 1 1735 142 1
 0 -33 1 217 50 1
 0 -33 -1 376 62 1
 0 33 -1 312 73 1
 0 33 1 237 71 1
 1 -33 1 354 51 1
 -1 -33 -1 276 58 1
 -1 33 -1 442 75 1
 1 33 1 444 78 1
 -2 -33 -1 2552 150 1
 2 33 1 2334 160 1
 -2 33 -1 2457 165 1
 -3 -33 -1 2765 169 1
 3 33 1 3229 185 1
 -3 33 -1 3108 193 1
 4 -33 1 711 90 1
 -4 -33 -1 657 89 1
 4 33 1 769 90 1
 -5 -33 -1 93 58 1
 5 -33 1 134 63 1
 5 33 1 189 61 1
 -6 -33 -1 917 98 1
 -6 -33 -1 1045 112 1
 6 -33 1 1083 120 1
 6 33 1 926 100 1
 -7 -33 -1 96 48 1
 -7 -33 -1 83 58 1
 7 -33 1 227 68 1
 7 33 1 126 54 1
 -8 -33 -1 594 99 1
 -8 -33 -1 680 85 1
 8 -33 1 671 92 1
 9 -33 1 481 83 1
 -9 -33 -1 383 80 1
 -9 -33 -1 540 82 1
 -10 -33 -1 846 113 1
 -10 -33 -1 868 98 1
 10 -33 1 1115 117 1
 -11 -33 -1 15 66 1
 -11 -33 -1 3 51 1
 -11 -34 1 810 95 1
 -11 -34 1 1033 126 1
 -10 -34 1 51 54 1
 -10 -34 1 80 72 1
 -9 -34 1 157 64 1
 9 -34 -1 161 63 1
 -9 -34 1 185 65 1
 8 -34 -1 400 78 1
 -8 -34 1 411 78 1
 -8 -34 1 429 87 1
 7 -34 -1 93 60 1
 -7 -34 1 7 40 1
 -7 -34 1 86 61 1
 7 34 -1 90 52 1
 6 -34 -1 1085 116 1
 -6 -34 1 857 99 1
 -6 -34 1 873 97 1
 6 34 -1 928 98 1
 -5 -34 1 14218 568 1
 -5 34 1 14065 589 1
 5 34 -1 14100 565 1
 -4 -34 1 1508 117 1
 4 34 -1 1452 121 1
 -4 34 1 1202 128 1
 3 -34 -1 326 56 1
 -3 -34 1 273 61 1
 3 34 -1 309 68 1
 -3 34 1 309 75 1
 -2 -34 1 5317 256 1
 2 -34 -1 5547 249 1
 -2 34 1 6130 293 1
 2 34 -1 5548 273 1
 -1 -34 1 119 47 1
 1 -34 -1 87 43 1
 -1 34 1 137 58 1
 1 34 -1 89 59 1
 0 -34 1 535 63 1
 0 -34 -1 499 69 1
 0 34 -1 399 75 1
 0 34 1 397 77 1
 -1 -34 -1 60 45 1
 1 34 1 227 66 1
 -1 34 -1 119 59 1
 -2 -34 -1 735 88 1
 -2 34 -1 876 108 1
 2 34 1 965 108 1
 -3 -34 -1 655 84 1
 -3 34 -1 681 100 1
 3 34 1 951 107 1
 -4 -34 -1 833 98 1
 4 -34 1 588 91 1
 4 34 1 947 105 1
 5 -34 1 518 91 1
 -5 -34 -1 499 87 1
 5 34 1 710 92 1
 -6 -34 -1 2138 152 1
 -6 -34 -1 1836 130 1
 6 -34 1 1974 145 1
 6 34 1 2162 143 1
 7 -34 1 742 100 1
 -7 -34 -1 644 94 1
 -7 -34 -1 562 81 1
 7 34 1 800 95 1
 -8 -34 -1 405 71 1
 -8 -34 -1 578 98 1
 8 -34 1 634 94 1
 8 34 1 475 82 1
 -9 -34 -1 1747 130 1
 -9 -34 -1 1670 139 1
 9 -34 1 1607 135 1
 10 -34 1 673 96 1
 -10 -34 -1 606 96 1
 -10 -34 -1 386 77 1
 -11 -34 -1 27 64 1
 -11 -34 -1 87 56 1
 -11 -35 1 1021 116 1
 -11 -35 1 967 127 1
 -10 -35 1 53 68 1
 -10 -35 1 102 63 1
 9 -35 -1 48 57 1
 -9 -35 1 18 61 1
 -9 -35 1 4 52 1
 -8 -35 1 303 68 1
 -8 -35 1 265 74 1
 8 -35 -1 264 72 1
 -7 -35 1 150 68 1
 7 -35 -1 235 67 1
 -7 -35 1 187 64 1
 7 35 -1 284 66 1
 -6 -35 1 2404 153 1
 6 -35 -1 2444 163 1
 -6 -35 1 2139 157 1
 6 35 -1 2582 154 1
 -5 -35 1 10156 433 1
 5 35 -1 10359 430 1
 -5 35 1 9511 447 1
 -4 -35 1 326 69 1
 -4 35 1 304 77 1
 -3 -35 1 5438 255 1
 3 35 -1 5260 266 1
 -3 35 1 5240 282 1
 -2 -35 1 409 68 1
 2 -35 -1 513 67 1
 2 35 -1 452 79 1
 -2 35 1 471 83 1
 -1 -35 1 65 44 1
 1 -35 -1 117 45 1
 1 35 -1 85 57 1
 -1 35 1 61 53 1
 0 -35 -1 468 72 1
 0 -35 1 601 72 1
 0 35 1 493 90 1
 0 35 -1 598 97 1
 -1 -35 -1 883 94 1
 -1 35 -1 950 113 1
 1 35 1 856 104 1
 -2 -35 -1 468 69 1
 -2 35 -1 383 77 1
 2 35 1 264 67 1
 -3 -35 -1 585 83 1
 -3 35 -1 404 86 1
 3 35 1 454 81 1
 -4 -35 -1 1358 120 1
 4 -35 1 1056 114 1
 4 35 1 1147 113 1
 -5 -35 -1 2097 154 1
 5 -35 1 1955 151 1
 5 35 1 2115 147 1
 -6 -35 -1 2509 170 1
 -6 -35 -1 2763 157 1
 6 -35 1 2375 169 1
 6 35 1 2607 163 1
 -7 -35 -1 339 69 1
 -7 -35 -1 208 70 1
 7 -35 1 336 78 1
 7 35 1 318 70 1
 -8 -35 -1 282 81 1
 -8 -35 -1 272 64 1
 8 -35 1 276 71 1
 -9 -35 -1 703 88 1
 -9 -35 -1 602 93 1
 9 -35 1 651 94 1
 -10 -35 -1 74 62 1
 10 -35 1 127 65 1
 -10 -35 -1 42 55 1
 -11 -35 -1 179 62 1
 -11 -35 -1 65 64 1
 -11 -36 1 73 62 1
 -11 -36 1 21 70 1
 -10 -36 1 349 82 1
 9 -36 -1 607 92 1
 -9 -36 1 661 101 1
 -9 -36 1 835 101 1
 -8 -36 1 31 62 1
 8 -36 -1 18 57 1
 -8 -36 1 71 53 1
 -7 -36 1 192 70 1
 7 -36 -1 165 61 1
 -7 -36 1 119 58 1
 7 36 -1 172 63 1
 -6 -36 1 4101 210 1
 6 -36 -1 3384 206 1
 -6 -36 1 3531 197 1
 6 36 -1 3714 199 1
 -5 -36 1 1932 138 1
 5 36 -1 1713 137 1
 -5 36 1 1642 148 1
 -4 -36 1 1600 129 1
 4 36 -1 1560 129 1
 -4 36 1 1871 163 1
 -3 -36 1 5853 279 1
 3 36 -1 6513 299 1
 -3 36 1 6315 309 1
 -2 -36 1 2119 134 1
 2 -36 -1 1767 124 1
 -2 36 1 1991 155 1
 2 36 -1 2073 150 1
 1 -36 -1 104 49 1
 -1 -36 1 160 52 1
 1 36 -1 114 60 1
 -1 36 1 114 65 1
 0 -36 -1 1699 128 1
 0 -36 1 1720 118 1
 0 36 1 2203 157 1
 0 36 -1 1965 146 1
 -1 -36 -1 1219 103 1
 1 36 1 1035 112 1
 -1 36 -1 1214 126 1
 -2 -36 -1 592 80 1
 2 36 1 766 103 1
 -2 36 -1 712 101 1
 -3 -36 -1 714 89 1
 -3 36 -1 647 103 1
 3 36 1 843 105 1
 -4 -36 -1 586 88 1
 4 -36 1 412 83 1
 4 36 1 676 96 1
 -5 -36 -1 1658 136 1
 5 -36 1 1682 134 1
 5 36 1 1790 134 1
 6 -36 1 1726 141 1
 -6 -36 -1 1941 144 1
 -6 -36 -1 1791 128 1
 6 36 1 2105 144 1
 -7 -36 -1 221 62 1
 -7 -36 -1 218 73 1
 7 -36 1 179 64 1
 -8 -36 -1 2972 187 1
 -8 -36 -1 2431 158 1
 8 -36 1 2685 178 1
 8 36 1 2828 176 1
 9 -36 1 160 66 1
 -9 -36 -1 58 60 1
 -9 -36 -1 82 58 1
 10 -36 1 125 65 1
 -10 -36 -1 92 56 1
 -10 -36 -1 66 62 1
 -11 -36 -1 600 93 1
 -11 -36 -1 534 101 1
 -10 -37 1 393 79 1
 -10 -37 1 204 73 1
 -9 -37 1 363 79 1
 -9 -37 1 215 78 1
 9 -37 -1 324 78 1
 -8 -37 1 257 75 1
 8 -37 -1 78 59 1
 -8 -37 1 154 62 1
 -7 -37 1 156 64 1
 7 -37 -1 215 68 1
 -7 -37 1 317 81 1
 -6 -37 1 797 98 1
 6 -37 -1 679 99 1
 -6 -37 1 776 96 1
 6 37 -1 750 91 1
 -5 -37 1 2070 151 1
 5 37 -1 2348 156 1
 -5 37 1 2411 175 1
 -4 -37 1 2069 143 1
 -4 37 1 2011 157 1
 4 37 -1 1886 145 1
 -3 -37 1 7701 348 1
 3 37 -1 7744 358 1
 -3 37 1 7859 376 1
 2 -37 -1 7889 334 1
 -2 -37 1 7311 329 1
 -2 37 1 8049 368 1
 2 37 -1 8078 357 1
 1 -37 -1 72 45 1
 -1 -37 1 88 48 1
 1 37 -1 12 47 1
 -1 37 1 111 63 1
 0 -37 -1 67 45 1
 0 37 -1 145 63 1
 0 37 1 115 65 1
 -1 -37 -1 25 46 1
 1 37 1 71 60 1
 -1 37 -1 144 60 1
 -2 -37 -1 2589 157 1
 -2 37 -1 2589 173 1
 2 37 1 2580 171 1
 -3 -37 -1 3708 197 1
 3 37 1 3597 213 1
 -3 37 -1 3793 221 1
 4 -37 1 74 58 1
 -4 -37 -1 135 61 1
 4 37 1 82 57 1
 5 -37 1 104 55 1
 -5 -37 -1 100 60 1
 5 37 1 38 52 1
 -6 -37 -1 2443 164 1
 6 -37 1 2445 168 1
 -6 -37 -1 2365 153 1
 6 37 1 2662 161 1
 7 -37 1 638 98 1
 -7 -37 -1 800 106 1
 -7 -37 -1 696 86 1
 7 37 1 546 83 1
 -8 -37 -1 151 59 1
 -8 -37 -1 69 66 1
 8 -37 1 127 66 1
 8 37 1 88 61 1
 -9 -37 -1 318 74 1
 -9 -37 -1 315 79 1
 9 -37 1 371 82 1
 -10 -37 -1 1173 113 1
 10 -37 1 1312 134 1
 -10 -37 -1 987 121 1
 -10 -38 1 44 61 1
 -10 -38 1 153 76 1
 9 -38 -1 44 59 1
 -9 -38 1 0 61 1
 -9 -38 1 77 57 1
 -8 -38 1 776 97 1
 -8 -38 1 731 104 1
 8 -38 -1 899 106 1
 -7 -38 1 548 83 1
 -7 -38 1 785 106 1
 7 -38 -1 597 97 1
 -6 -38 1 37 53 1
 -6 -38 1 75 58 1
 6 -38 -1 0 51 1
 6 38 -1 18 50 1
 -5 -38 1 4810 256 1
 -5 38 1 5758 288 1
 5 38 -1 5493 264 1
 -4 -38 1 560 86 1
 -4 38 1 385 91 1
 4 38 -1 508 87 1
 -3 -38 1 743 92 1
 3 38 -1 857 106 1
 -3 38 1 949 114 1
 -2 -38 1 5025 251 1
 -2 38 1 5651 284 1
 2 38 -1 5421 275 1
 -1 -38 1 1169 108 1
 1 -38 -1 1314 111 1
 1 38 -1 1543 141 1
 -1 38 1 1456 143 1
 0 -38 -1 1886 126 1
 0 38 -1 1861 148 1
 0 38 1 2023 153 1
 -1 -38 -1 328 68 1
 -1 38 -1 383 83 1
 1 38 1 306 79 1
 -2 -38 -1 934 100 1
 -2 38 -1 1201 129 1
 2 38 1 877 106 1
 -3 -38 -1 1684 131 1
 -3 38 -1 1839 143 1
 3 38 1 1846 137 1
 4 -38 1 686 97 1
 -4 -38 -1 772 102 1
 4 38 1 969 112 1
 -5 -38 -1 1351 132 1
 5 -38 1 1337 130 1
 -6 -38 -1 4036 212 1
 -6 -38 -1 4445 236 1
 6 -38 1 4001 230 1
 6 38 1 4627 234 1
 7 -38 1 1656 137 1
 -7 -38 -1 1487 142 1
 -7 -38 -1 1349 115 1
 7 38 1 1638 130 1
 -8 -38 -1 2 56 1
 8 -38 1 83 60 1
 -8 -38 -1 32 51 1
 9 -38 1 0 59 1
 -9 -38 -1 1 63 1
 -9 -38 -1 57 52 1
 -10 -38 -1 206 75 1
 10 -38 1 279 79 1
 -10 -38 -1 304 75 1
 -10 -39 1 0 65 1
 -10 -39 1 0 58 1
 9 -39 -1 35 57 1
 -9 -39 1 49 61 1
 -9 -39 1 70 69 1
 8 -39 -1 335 78 1
 -8 -39 1 341 82 1
 -8 -39 1 435 78 1
 7 -39 -1 688 102 1
 -7 -39 1 630 97 1
 -7 -39 1 568 92 1
 6 -39 -1 136 62 1
 -6 -39 1 207 69 1
 6 39 -1 135 62 1
 -5 -39 1 2233 155 1
 -5 39 1 2064 170 1
 5 39 -1 2234 156 1
 -4 -39 1 66 58 1
 -4 39 1 102 67 1
 4 39 -1 146 65 1
 -3 -39 1 3281 184 1
 -3 39 1 3046 205 1
 3 39 -1 3136 192 1
 -2 -39 1 235 62 1
 2 39 -1 196 69 1
 -2 39 1 214 72 1
 1 -39 -1 3847 206 1
 -1 -39 1 4040 206 1
 -1 39 1 4117 236 1
 1 39 -1 4180 232 1
 0 -39 -1 291 64 1
 0 39 1 254 74 1
 0 39 -1 271 70 1
 -1 -39 -1 1171 110 1
 -1 39 -1 1444 141 1
 1 39 1 1450 142 1
 -2 -39 -1 4405 220 1
 -2 39 -1 4149 233 1
 2 39 1 4146 230 1
 -3 -39 -1 2587 164 1
 3 39 1 2743 176 1
 -3 39 -1 3008 190 1
 4 -39 1 1050 116 1
 -4 -39 -1 1141 114 1
 4 39 1 1006 109 1
 5 -39 1 2965 192 1
 -5 -39 -1 3421 197 1
 5 39 1 3444 205 1
 6 -39 1 4192 231 1
 -6 -39 -1 4541 234 1
 -6 -39 -1 4138 218 1
 -7 -39 -1 517 79 1
 7 -39 1 601 91 1
 -7 -39 -1 515 87 1
 7 39 1 433 79 1
 -8 -39 -1 124 69 1
 -8 -39 -1 208 63 1
 8 -39 1 172 69 1
 9 -39 1 38 60 1
 -9 -39 -1 52 57 1
 -9 -39 -1 5 63 1
 10 -39 1 171 75 1
 -10 -39 -1 86 62 1
 -10 -39 -1 94 73 1
 -10 -40 1 1084 124 1
 -10 -40 1 896 121 1
 9 -40 -1 287 77 1
 -9 -40 1 221 70 1
 -9 -40 1 131 75 1
 -8 -40 1 164 67 1
 -8 -40 1 292 85 1
 8 -40 -1 132 70 1
 7 -40 -1 900 111 1
 -7 -40 1 900 104 1
 -7 -40 1 968 111 1
 6 -40 -1 210 65 1
 -6 -40 1 280 77 1
 6 40 -1 213 66 1
 -5 -40 1 191 70 1
 5 40 -1 206 65 1
 -5 40 1 173 74 1
 -4 -40 1 815 96 1
 4 40 -1 820 105 1
 -4 40 1 614 99 1
 -3 -40 1 2913 174 1
 -3 40 1 3216 206 1
 3 40 -1 3177 193 1
 -2 -40 1 2329 157 1
 2 40 -1 2665 178 1
 -2 40 1 2959 190 1
 -1 40 1 3307 207 1
 1 40 -1 3352 203 1
 0 -40 -1 147 55 1
 0 40 -1 85 61 1
 0 40 1 195 73 1
 -1 -40 -1 1095 107 1
 -1 40 -1 1108 124 1
 1 40 1 1228 131 1
 -2 -40 -1 829 94 1
 2 40 1 682 105 1
 -2 40 -1 1008 118 1
 -3 -40 -1 821 100 1
 3 40 1 956 111 1
 -3 40 -1 859 117 1
 -4 -40 -1 340 79 1
 4 -40 1 211 71 1
 4 40 1 179 69 1
 -5 -40 -1 2973 183 1
 5 -40 1 2550 172 1
 6 -40 1 230 70 1
 -6 -40 -1 306 76 1
 -6 -40 -1 328 71 1
 6 40 1 225 71 1
 -7 -40 -1 93 64 1
 7 -40 1 51 59 1
 -7 -40 -1 1 50 1
 7 40 1 111 59 1
 8 -40 1 2685 180 1
 -8 -40 -1 2505 181 1
 -8 -40 -1 2679 167 1
 9 -40 1 36 62 1
 -9 -40 -1 129 72 1
 -9 -40 -1 23 55 1
 10 -40 1 44 67 1
 -10 -40 -1 57 63 1
 -10 -40 -1 43 73 1
 -9 -41 1 969 111 1
 -9 -41 1 1036 125 1
 9 -41 -1 1083 120 1
 -8 -41 1 31 69 1
 -8 -41 1 224 69 1
 8 -41 -1 153 70 1
 -7 -41 1 1015 116 1
 7 -41 -1 829 111 1
 -7 -41 1 862 104 1
 -6 -41 1 562 94 1
 6 -41 -1 664 100 1
 6 41 -1 526 88 1
 -5 -41 1 97 61 1
 5 41 -1 100 62 1
 -5 41 1 121 72 1
 -4 -41 1 1859 138 1
 -4 41 1 1700 155 1
 4 41 -1 1615 140 1
 -3 -41 1 3060 183 1
 3 41 -1 2823 187 1
 -3 41 1 2995 202 1
 -2 -41 1 489 78 1
 2 41 -1 426 85 1
 -2 41 1 582 98 1
 -1 41 1 342 77 1
 1 41 -1 310 69 1
 0 -41 -1 130 55 1
 0 41 1 73 65 1
 0 41 -1 42 59 1
 -1 -41 -1 3033 172 1
 1 41 1 2940 191 1
 -1 41 -1 2883 191 1
 -2 -41 -1 248 64 1
 -2 41 -1 322 82 1
 2 41 1 342 80 1
 -3 -41 -1 303 72 1
 -3 41 -1 180 70 1
 3 41 1 285 71 1
 4 -41 1 349 82 1
 -4 -41 -1 354 81 1
 4 41 1 227 68 1
 -5 -41 -1 995 113 1
 5 -41 1 806 101 1
 5 41 1 1061 112 1
 -6 -41 -1 98 57 1
 -6 -41 -1 38 61 1
 6 -41 1 53 62 1
 7 -41 1 150 70 1
 -7 -41 -1 106 58 1
 -7 -41 -1 158 75 1
 7 41 1 177 72 1
 -8 -41 -1 183 79 1
 8 -41 1 191 70 1
 -8 -41 -1 133 63 1
 -9 -41 -1 10 72 1
 -9 -41 -1 84 60 1
 9 -41 1 37 63 1
 -9 -42 1 307 88 1
 9 -42 -1 289 79 1
 -9 -42 1 416 87 1
 8 -42 -1 852 112 1
 -8 -42 1 796 103 1
 -8 -42 1 855 118 1
 -7 -42 1 2145 156 1
 -7 -42 1 2359 170 1
 7 -42 -1 2419 167 1
 -6 -42 1 1261 125 1
 6 -42 -1 1254 134 1
 6 42 -1 1287 125 1
 -5 -42 1 182 71 1
 5 42 -1 80 60 1
 -5 42 1 212 74 1
 -4 -42 1 779 99 1
 -4 42 1 693 102 1
 4 42 -1 835 106 1
 -3 -42 1 400 76 1
 3 42 -1 547 91 1
 -3 42 1 341 86 1
 -2 42 1 908 111 1
 2 42 -1 882 103 1
 1 42 -1 4565 248 1
 -1 42 1 4521 248 1
 0 42 -1 5086 264 1
 0 42 1 4753 270 1
 -1 -42 -1 387 72 1
 1 42 1 505 97 1
 -1 42 -1 357 83 1
 -2 -42 -1 745 90 1
 2 42 1 700 101 1
 -2 42 -1 525 90 1
 -3 -42 -1 1791 139 1
 3 42 1 1753 146 1
 -3 42 -1 1877 155 1
 4 -42 1 260 76 1
 -4 -42 -1 260 74 1
 4 42 1 300 80 1
 5 -42 1 121 66 1
 -5 -42 -1 241 79 1
 5 42 1 235 71 1
 6 -42 1 263 77 1
 -6 -42 -1 350 85 1
 -6 -42 -1 248 66 1
 7 -42 1 1423 139 1
 -7 -42 -1 1612 144 1
 -7 -42 -1 1088 114 1
 8 -42 1 454 91 1
 -8 -42 -1 382 91 1
 -8 -42 -1 355 79 1
 9 -42 1 8 60 1
 -9 -42 -1 87 74 1
 9 -43 -1 199 71 1
 -9 -43 1 110 76 1
 -9 -43 1 96 66 1
 -8 -43 1 30 62 1
 8 -43 -1 91 67 1
 -8 -43 1 101 73 1
 -7 -43 1 67 69 1
 -7 -43 1 67 61 1
 7 -43 -1 0 55 1
 6 -43 -1 1006 122 1
 -6 -43 1 917 114 1
 -5 -43 1 131 66 1
 -5 43 1 176 77 1
 5 43 -1 165 69 1
 -4 -43 1 40 58 1
 4 43 -1 63 60 1
 -4 43 1 55 64 1
 -3 -43 1 1757 135 1
 3 43 -1 1746 140 1
 -3 43 1 1509 147 1
 -2 43 1 173 75 1
 2 43 -1 328 80 1
 -1 43 1 3450 213 1
 1 43 -1 3496 210 1
 0 43 1 185 70 1
 0 43 -1 150 68 1
 -1 -43 -1 745 91 1
 1 43 1 612 97 1
 -1 43 -1 562 94 1
 -2 -43 -1 252 69 1
 2 43 1 291 74 1
 -2 43 -1 276 82 1
 -3 -43 -1 358 78 1
 -3 43 -1 328 84 1
 3 43 1 206 77 1
 4 -43 1 182 69 1
 -4 -43 -1 108 68 1
 -5 -43 -1 36 64 1
 5 -43 1 0 55 1
 5 43 1 52 57 1
 -6 -43 -1 732 94 1
 -6 -43 -1 610 97 1
 6 -43 1 743 106 1
 -7 -43 -1 281 70 1
 -7 -43 -1 237 76 1
 7 -43 1 270 79 1
 -8 -43 -1 786 108 1
 -8 -43 -1 831 103 1
 8 -43 1 825 113 1
 9 -43 1 949 121 1
 -9 -43 -1 889 123 1
 8 -44 -1 153 75 1
 -8 -44 1 113 76 1
 -8 -44 1 37 64 1
 7 -44 -1 728 103 1
 -7 -44 1 787 111 1
 -7 -44 1 879 108 1
 6 -44 -1 456 84 1
 -6 -44 1 310 82 1
 6 44 -1 432 85 1
 -5 -44 1 68 64 1
 -5 44 1 52 66 1
 -4 -44 1 84 62 1
 4 44 -1 1 51 1
 -4 44 1 142 65 1
 3 44 -1 815 112 1
 -3 44 1 782 117 1
 2 44 -1 1384 144 1
 -2 44 1 1785 163 1
 1 44 -1 4813 274 1
 -1 44 1 5442 277 1
 0 44 1 853 110 1
 0 44 -1 900 116 1
 -1 -44 -1 178 61 1
 1 44 1 123 63 1
 -1 44 -1 173 72 1
 -2 -44 -1 563 84 1
 -2 44 -1 763 102 1
 2 44 1 494 93 1
 -3 -44 -1 144 68 1
 3 44 1 152 71 1
 -3 44 -1 100 62 1
 4 -44 1 357 81 1
 -4 -44 -1 457 87 1
 4 44 1 418 87 1
 5 -44 1 557 97 1
 -5 -44 -1 521 95 1
 6 -44 1 190 67 1
 -6 -44 -1 201 80 1
 -6 -44 -1 171 65 1
 -7 -44 -1 297 88 1
 -7 -44 -1 313 74 1
 7 -44 1 207 77 1
 -8 -44 -1 133 77 1
 8 -44 1 62 69 1
 8 -45 -1 189 74 1
 -8 -45 1 204 73 1
 -8 -45 1 90 77 1
 -7 -45 1 1128 119 1
 -7 -45 1 841 114 1
 7 -45 -1 1049 121 1
 -6 -45 1 291 86 1
 6 -45 -1 534 93 1
 6 45 -1 409 84 1
 -5 -45 1 201 72 1
 -5 45 1 143 73 1
 -4 -45 1 164 68 1
 -4 45 1 286 88 1
 4 45 -1 231 76 1
 -3 45 1 1757 158 1
 -2 45 1 761 110 1
 2 45 -1 593 97 1
 -1 45 1 225 75 1
 1 45 -1 273 73 1
 0 45 1 1931 150 1
 0 45 -1 2030 151 1
 -1 45 -1 606 96 1
 1 45 1 492 91 1
 -2 -45 -1 400 79 1
 -2 45 -1 350 87 1
 2 45 1 343 88 1
 -3 -45 -1 362 82 1
 3 45 1 317 83 1
 -3 45 -1 396 90 1
 4 -45 1 1035 122 1
 -4 -45 -1 1015 114 1
 4 45 1 1009 122 1
 -5 -45 -1 1050 119 1
 5 -45 1 1401 140 1
 5 45 1 893 118 1
 6 -45 1 565 92 1
 -6 -45 -1 462 80 1
 -6 -45 -1 648 103 1
 7 -45 1 947 120 1
 -7 -45 -1 1017 120 1
 8 -45 1 108 71 1
 -8 -45 -1 105 79 1
 -7 -46 1 1452 144 1
 7 -46 -1 1141 133 1
 -7 -46 1 1291 127 1
 -6 -46 1 1139 130 1
 6 -46 -1 1253 134 1
 -5 -46 1 0 59 1
 -5 46 1 0 60 1
 5 46 -1 0 59 1
 -4 -46 1 0 60 1
 -4 46 1 16 57 1
 4 46 -1 68 63 1
 3 46 -1 175 68 1
 -3 46 1 231 79 1
 -2 46 1 62 58 1
 2 46 -1 289 77 1
 -1 46 1 3200 213 1
 1 46 -1 3261 198 1
 0 46 1 3712 218 1
 0 46 -1 3726 225 1
 1 46 1 310 79 1
 -1 46 -1 146 73 1
 -2 46 -1 337 80 1
 2 46 1 411 91 1
 -3 -46 -1 1249 129 1
 -3 46 -1 1376 146 1
 4 -46 1 350 84 1
 -4 -46 -1 415 91 1
 5 -46 1 701 101 1
 -5 -46 -1 784 109 1
 5 46 1 892 115 1
 -6 -46 -1 481 100 1
 6 -46 1 412 88 1
 7 -46 1 3597 221 1
 -7 -46 -1 3921 231 1
 -7 -47 1 497 91 1
 -7 -47 1 501 101 1
 7 -47 -1 523 98 1
 -6 -47 1 715 108 1
 6 -47 -1 602 99 1
 5 -47 -1 387 87 1
 -5 -47 1 296 81 1
 5 47 -1 315 82 1
 -5 47 1 328 84 1
 4 47 -1 630 104 1
 -4 47 1 717 115 1
 3 47 -1 297 79 1
 -3 47 1 133 79 1
 -2 47 1 378 93 1
 2 47 -1 230 77 1
 1 47 -1 288 80 1
 -1 47 1 301 80 1
 0 47 -1 198 76 1
 0 47 1 92 60 1
 1 47 1 623 99 1
 -1 47 -1 673 111 1
 2 47 1 419 105 1
 -2 47 -1 475 98 1
 -3 -47 -1 352 84 1
 3 -47 1 361 86 1
 -3 47 -1 272 81 1
 3 47 1 273 89 1
 -4 -47 -1 471 92 1
 4 -47 1 307 76 1
 4 47 1 474 93 1
 5 -47 1 324 81 1
 -5 -47 -1 665 104 1
 5 47 1 513 106 1
 6 -47 1 275 83 1
 -6 -47 -1 104 71 1
 7 -47 1 636 103 1
 -7 -47 -1 754 111 1
 -7 -48 1 690 99 1
 7 -48 -1 358 85 1
 -7 -48 1 425 94 1
 -6 -48 1 364 93 1
 6 -48 -1 392 85 1
 6 48 -1 511 97 1
 5 -48 -1 795 115 1
 -5 48 1 867 129 1
 -4 48 1 1017 131 1
 3 48 -1 304 83 1
 -3 48 1 595 102 1
 -2 48 1 0 58 1
 -1 48 1 4225 238 1
 1 48 -1 4215 240 1
 0 48 1 83 62 1
 0 48 -1 40 60 1
 -1 48 -1 138 61 1
 1 48 1 89 68 1
 -2 48 -1 161 69 1
 2 48 1 91 75 1
 -3 -48 -1 1163 129 1
 3 -48 1 1253 137 1
 3 48 1 1524 149 1
 -3 48 -1 1589 158 1
 4 -48 1 409 92 1
 -4 -48 -1 247 80 1
 4 48 1 311 83 1
 -5 -48 -1 870 117 1
 5 -48 1 1027 127 1
 5 48 1 777 114 1
 -6 -48 -1 126 77 1
 6 -48 1 193 79 1
 6 -49 -1 214 82 1
 -6 -49 1 362 93 1
 6 49 -1 246 81 1
 5 -49 -1 708 109 1
 -5 49 1 591 113 1
 4 49 -1 3340 210 1
 -4 49 1 3568 232 1
 -3 49 1 2716 190 1
 3 49 -1 2254 169 1
 -2 49 1 385 88 1
 1 49 -1 994 125 1
 -1 49 1 1386 139 1
 0 49 1 2664 194 1
 0 49 -1 2684 191 1
 1 49 1 133 77 1
 2 49 1 40 70 1
 -2 49 -1 34 64 1
 3 -49 1 744 112 1
 3 49 1 823 114 1
 -3 49 -1 848 115 1
 4 -49 1 203 78 1
 -4 -49 -1 145 78 1
 5 -49 1 449 93 1
 5 49 1 355 91 1
 6 -49 1 183 78 1
 -6 -49 -1 149 80 1
 6 49 1 37 74 1
 5 -50 -1 9 64 1
 -5 50 1 119 80 1
 5 50 -1 0 60 1
 -4 50 1 862 118 1
 4 50 -1 624 98 1
 -3 50 1 1853 164 1
 3 50 -1 1980 156 1
 -2 50 1 358 82 1
 2 50 -1 219 75 1
 -1 50 1 112 81 1
 1 50 -1 154 71 1
 0 50 -1 146 83 1
 0 50 1 130 72 1
 1 50 1 1001 127 1
 -1 50 -1 1145 135 1
 2 50 1 180 69 1
 -2 50 -1 305 82 1
 3 -50 1 242 81 1
 3 50 1 164 75 1
 -3 50 -1 78 74 1
 4 -50 1 20 68 1
 -4 -50 -1 0 71 1
 5 -50 1 103 65 1
 5 51 -1 131 70 1
 -5 51 1 223 89 1
 -4 51 1 98 68 1
 4 51 -1 134 66 1
 3 51 -1 2718 187 1
 -3 51 1 2502 199 1
 2 51 -1 873 107 1
 -2 51 1 904 134 1
 1 51 -1 305 73 1
 0 51 -1 815 116 1
 0 51 1 966 131 1
 -1 51 -1 675 100 1
 1 51 1 784 115 1
 2 51 1 1915 168 1
 -2 51 -1 2180 173 1
 3 -51 1 500 94 1
 3 51 1 424 99 1
 -3 51 -1 515 97 1
 4 -51 1 154 75 1
 4 51 1 251 86 1
 5 -51 1 0 64 1
 -5 -51 -1 90 79 1
 5 51 1 0 66 1
 -3 52 1 277 81 1
 -2 52 1 150 83 1
 2 52 -1 125 70 1
 -1 52 1 602 113 1
 1 52 -1 549 99 1
 0 52 1 508 102 1
 0 52 -1 379 88 1
 1 52 1 79 71 1
 2 52 1 232 83 1
 -2 52 -1 211 80 1
 3 -52 1 1126 128 1
 3 52 1 1118 141 1
 4 -52 1 419 96 1
 4 52 1 495 97 1
 3 53 -1 576 96 1
 1 53 -1 1 60 1
 -1 53 1 94 78 1
 0 53 -1 83 68 1
 -1 53 -1 248 88 1
 1 53 1 259 85 1
 2 53 1 109 76 1
 3 -53 1 280 86 1
 0 54 1 410 98 1
 0 54 -1 229 81 1
 1 54 1 87 73 1
 -1 54 -1 96 65 1
 -14 0 2 119 60 1
 -13 0 2 76 60 1
 -13 0 2 23 40 1
 -12 0 2 293 60 1
 -12 0 2 212 62 1
 -11 0 2 80 39 1
 -11 0 2 10 49 1
 -10 0 2 82 40 1
 -10 0 2 61 49 1
 -9 0 2 71 38 1
 -9 0 2 1 38 1
 -8 0 2 1917 118 1
 -8 0 2 2135 134 1
 7 0 -2 1315 69 1
 -7 0 2 1538 108 1
 -7 0 2 1539 96 1
 6 0 -2 703 43 1
 -6 0 2 837 83 1
 -6 0 2 646 65 1
 -5 0 2 1574 98 1
 -5 0 2 1410 81 1
 -4 0 2 659 67 1
 -4 0 2 607 51 1
 -3 0 2 55 36 1
 -3 0 2 23 26 1
 -2 0 2 20068 693 1
 -2 0 2 19614 729 1
 -1 0 2 4980 193 1
 1 0 2 24755 841 1
 2 0 2 4600 177 1
 -2 0 -2 4558 166 1
 -4 0 -2 1472 85 1
 4 0 2 1391 86 1
 5 0 2 5391 232 1
 -5 0 -2 5738 228 1
 -5 0 -2 5559 239 1
 6 0 2 424 49 1
 -6 0 -2 468 55 1
 -6 0 -2 377 47 1
 -7 0 -2 508 62 1
 -7 0 -2 539 61 1
 7 0 2 520 57 1
 8 0 2 12 27 1
 -8 0 -2 134 41 1
 -8 0 -2 55 32 1
 -9 0 -2 99 46 1
 9 0 2 107 37 1
 -9 0 -2 70 36 1
 -10 0 -2 13 36 1
 -10 0 -2 23 43 1
 10 0 2 109 37 1
 -11 0 -2 11 48 1
 -11 0 -2 53 39 1
 -12 0 -2 40 43 1
 -12 0 -2 3 52 1
 -13 0 -2 446 85 1
 -13 0 -2 326 67 1
 -14 0 -2 124 59 1
 -14 -1 2 751 104 1
 -14 -1 2 610 87 1
 -14 1 2 387 68 1
 -13 -1 2 35 46 1
 -13 -1 2 195 65 1
 -13 1 2 114 61 1
 -13 1 2 93 52 1
 -12 -1 2 1444 126 1
 -12 -1 2 1355 107 1
 -12 1 2 1378 127 1
 -12 1 2 1442 109 1
 -11 -1 2 487 64 1
 -11 -1 2 361 72 1
 -11 1 2 441 62 1
 -11 1 2 537 80 1
 -10 -1 2 159 43 1
 -10 -1 2 207 59 1
 -10 1 2 264 63 1
 -10 1 2 283 52 1
 -9 -1 2 835 77 1
 -9 -1 2 1071 102 1
 -9 1 2 984 86 1
 -9 1 2 864 90 1
 -8 -1 2 7297 322 1
 -8 -1 2 7326 303 1
 -8 1 2 7326 323 1
 -8 1 2 7970 306 1
 -7 -1 2 2463 140 1
 7 -1 -2 2435 101 1
 -7 -1 2 2392 125 1
 -7 1 2 2403 138 1
 7 1 -2 2333 100 1
 -7 1 2 2580 125 1
 6 -1 -2 4809 184 1
 -6 -1 2 4900 207 1
 -6 -1 2 4902 224 1
 6 1 -2 4503 182 1
 -6 1 2 4370 202 1
 -6 1 2 4540 220 1
 -5 -1 2 3031 157 1
 -5 -1 2 2965 142 1
 -5 1 2 3478 161 1
 -5 1 2 3535 147 1
 -4 -1 2 649 57 1
 -4 -1 2 715 72 1
 -4 1 2 687 60 1
 -4 1 2 668 68 1
 -3 -1 2 3635 147 1
 -3 -1 2 3835 164 1
 -3 1 2 3355 158 1
 -3 1 2 3429 144 1
 -2 -1 2 3676 152 1
 -2 -1 2 3812 140 1
 -2 1 2 3796 139 1
 -2 1 2 3680 155 1
 -1 -1 2 2652 110 1
 -1 1 2 2493 110 1
 1 -1 2 1169 62 1
 -1 -1 -2 966 60 1
 1 1 2 1095 62 1
 -2 -1 -2 1660 61 1
 2 -1 2 1476 67 1
 -2 1 -2 1588 63 1
 2 1 2 1507 66 1
 -2 1 -2 1513 64 1
 -3 -1 -2 25713 858 1
 3 -1 2 24945 895 1
 -3 -1 -2 24897 896 1
 -3 1 -2 23840 858 1
 3 1 2 25008 894 1
 -3 1 -2 23908 892 1
 4 -1 2 1248 78 1
 -4 -1 -2 1236 81 1
 -4 -1 -2 1302 75 1
 -4 1 -2 1034 70 1
 4 1 2 1181 75 1
 -5 -1 -2 3145 137 1
 5 -1 2 3156 140 1
 -5 -1 -2 3236 146 1
 -5 1 -2 2636 134 1
 5 1 2 2765 136 1
 6 -1 2 332 46 1
 -6 -1 -2 363 48 1
 6 1 2 270 42 1
 -6 1 -2 212 44 1
 -6 1 -2 261 44 1
 7 -1 2 1028 71 1
 -7 -1 -2 1145 85 1
 -7 -1 -2 1270 80 1
 -7 1 -2 777 68 1
 7 1 2 736 66 1
 -7 1 -2 770 78 1
 -8 -1 -2 2836 154 1
 8 -1 2 3011 142 1
 -8 -1 -2 2784 144 1
 -8 1 -2 2634 151 1
 -8 1 -2 2667 141 1
 8 1 2 2877 141 1
 -9 -1 -2 3433 177 1
 -9 -1 -2 3742 169 1
 9 -1 2 3762 164 1
 -9 1 -2 3539 180 1
 -9 1 -2 3478 167 1
 9 1 2 3523 162 1
 10 -1 2 536 60 1
 -10 -1 -2 302 58 1
 -10 -1 -2 323 65 1
 -10 1 -2 276 52 1
 -10 1 -2 435 72 1
 10 1 2 451 54 1
 -11 -1 -2 505 82 1
 -11 -1 -2 429 64 1
 -11 1 -2 398 61 1
 -11 1 -2 406 72 1
 -12 -1 -2 467 78 1
 -12 -1 -2 465 71 1
 -12 1 -2 524 72 1
 -12 1 -2 578 88 1
 -13 -1 -2 624 80 1
 -13 -1 -2 604 94 1
 -13 1 -2 661 94 1
 -13 1 -2 611 84 1
 -14 -1 -2 277 66 1
 -14 1 -2 226 57 1
 -14 -2 2 2368 170 1
 -14 -2 2 2371 143 1
 -14 2 2 2580 173 1
 -14 2 2 2421 155 1
 -13 -2 2 77 58 1
 -13 -2 2 94 55 1
 -13 2 2 39 53 1
 -13 2 2 59 50 1
 -12 -2 2 470 84 1
 -12 -2 2 255 59 1
 -12 2 2 357 72 1
 -12 2 2 355 62 1
 -11 -2 2 2466 144 1
 -11 -2 2 2422 160 1
 -11 2 2 2747 160 1
 -11 2 2 2823 148 1
 -10 -2 2 4517 227 1
 -10 -2 2 4393 205 1
 -10 2 2 4184 200 1
 -10 2 2 4351 219 1
 -9 -2 2 1102 104 1
 -9 -2 2 902 85 1
 -9 2 2 905 81 1
 -9 2 2 1147 103 1
 -8 -2 2 26974 969 1
 -8 -2 2 27513 1021 1
 -8 2 2 26776 1015 1
 -8 2 2 27481 969 1
 7 -2 -2 12667 460 1
 -7 -2 2 12460 501 1
 -7 -2 2 12537 473 1
 7 2 -2 12606 457 1
 -7 2 2 12618 471 1
 -7 2 2 12753 500 1
 -6 -2 2 3164 146 1
 6 -2 -2 3176 125 1
 -6 -2 2 3366 164 1
 6 2 -2 3265 122 1
 -6 2 2 3151 145 1
 -6 2 2 2996 157 1
 -5 -2 2 1387 93 1
 -5 -2 2 1620 85 1
 5 -2 -2 1526 65 1
 -5 2 2 1381 83 1
 -5 2 2 1363 93 1
 -4 -2 2 4420 183 1
 -4 -2 2 4463 199 1
 -4 2 2 4598 199 1
 -4 2 2 4392 183 1
 -3 -2 2 25466 924 1
 -3 -2 2 25754 970 1
 -3 2 2 25145 969 1
 -3 2 2 26774 924 1
 -2 -2 2 191 30 1
 -2 -2 2 177 34 1
 -2 2 2 245 30 1
 -2 2 2 245 38 1
 -1 -2 2 262 31 1
 -1 2 2 482 41 1
 0 -2 2 4115 142 1
 0 2 2 4027 146 1
 0 2 2 4196 143 1
 -1 -2 -2 2334 113 1
 1 -2 2 2169 109 1
 1 2 2 2661 112 1
 2 -2 2 3396 157 1
 -2 -2 -2 3504 143 1
 -2 -2 -2 3425 158 1
 2 2 2 3568 156 1
 -2 2 -2 3366 146 1
 -2 2 -2 3368 149 1
 -3 -2 -2 19515 695 1
 3 -2 2 19774 727 1
 -3 -2 -2 20226 731 1
 -3 2 -2 20414 699 1
 3 2 2 20114 727 1
 -3 2 -2 20727 724 1
 -4 -2 -2 595 50 1
 4 -2 2 512 51 1
 -4 -2 -2 747 66 1
 -4 2 -2 602 54 1
 -4 2 -2 618 52 1
 4 2 2 658 52 1
 -5 -2 -2 214 38 1
 5 -2 2 186 37 1
 -5 -2 -2 172 42 1
 -5 2 -2 145 35 1
 5 2 2 132 33 1
 -6 -2 -2 4310 178 1
 -6 -2 -2 4116 190 1
 6 -2 2 4053 178 1
 6 2 2 4204 179 1
 -6 2 -2 3910 177 1
 -7 -2 -2 2801 141 1
 7 -2 2 2759 129 1
 -7 -2 -2 2591 129 1
 -7 2 -2 2327 127 1
 7 2 2 2391 126 1
 -7 2 -2 2303 129 1
 -8 -2 -2 410 62 1
 8 -2 2 435 53 1
 -8 -2 -2 432 57 1
 8 2 2 415 51 1
 -8 2 -2 450 59 1
 -8 2 -2 478 63 1
 -9 -2 -2 2394 145 1
 -9 -2 -2 2396 127 1
 9 -2 2 2624 126 1
 -9 2 -2 2576 141 1
 -9 2 -2 2522 132 1
 9 2 2 2341 122 1
 10 -2 2 858 73 1
 -10 -2 -2 831 84 1
 -10 -2 -2 820 95 1
 -10 2 -2 925 92 1
 -10 2 -2 721 79 1
 10 2 2 805 71 1
 -11 -2 -2 1474 116 1
 -11 -2 -2 1241 94 1
 -11 2 -2 1392 98 1
 -11 2 -2 1492 119 1
 -12 -2 -2 2543 160 1
 -12 -2 -2 2305 139 1
 -12 2 -2 2170 150 1
 -12 2 -2 2289 134 1
 -13 -2 -2 839 94 1
 -13 2 -2 994 98 1
 -14 -2 -2 0 44 1
 -14 2 -2 0 44 1
 -14 -3 2 1674 151 1
 -14 -3 2 1543 125 1
 -14 3 2 1799 133 1
 -14 3 2 1421 141 1
 -13 -3 2 1 43 1
 -13 -3 2 99 62 1
 -13 3 2 1 47 1
 -12 -3 2 1 40 1
 -12 -3 2 17 52 1
 -12 3 2 5 52 1
 -12 3 2 1 37 1
 -11 -3 2 157 60 1
 -11 -3 2 158 47 1
 -11 3 2 155 49 1
 -11 3 2 197 61 1
 -10 -3 2 2037 127 1
 -10 -3 2 2119 144 1
 -10 3 2 2111 127 1
 -10 3 2 2437 145 1
 -9 -3 2 45 33 1
 -9 -3 2 33 46 1
 -9 3 2 36 36 1
 -9 3 2 48 41 1
 -8 -3 2 1590 119 1
 -8 -3 2 1694 107 1
 -8 3 2 1700 116 1
 -8 3 2 1652 106 1
 7 -3 -2 12389 451 1
 -7 -3 2 12180 491 1
 -7 -3 2 11417 460 1
 -7 3 2 12553 489 1
 7 3 -2 11990 446 1
 -7 3 2 12518 462 1
 -6 -3 2 385 58 1
 -6 -3 2 259 42 1
 6 -3 -2 347 32 1
 6 3 -2 365 29 1
 -6 3 2 341 46 1
 -6 3 2 413 58 1
 -5 -3 2 302 56 1
 5 -3 -2 280 30 1
 -5 -3 2 256 43 1
 -5 3 2 212 49 1
 -5 3 2 214 41 1
 -4 -3 2 16559 618 1
 -4 -3 2 16615 586 1
 -4 3 2 16123 616 1
 -4 3 2 16846 586 1
 -3 -3 2 5979 237 1
 -3 -3 2 5828 252 1
 -3 3 2 7034 237 1
 -3 3 2 6979 257 1
 -2 -3 2 445 40 1
 -2 -3 2 390 42 1
 -2 3 2 317 31 1
 -2 3 2 338 40 1
 -1 -3 2 3412 154 1
 -1 3 2 3485 158 1
 0 -3 2 5947 250 1
 0 3 2 6199 250 1
 0 3 2 6345 256 1
 -1 -3 -2 523 44 1
 1 -3 2 477 38 1
 1 3 2 409 35 1
 2 -3 2 2505 119 1
 -2 -3 -2 2565 121 1
 -2 -3 -2 2368 103 1
 2 3 2 2252 114 1
 -2 3 -2 2264 108 1
 3 -3 2 11137 435 1
 -3 -3 -2 10784 437 1
 -3 -3 -2 10919 411 1
 3 3 2 11010 431 1
 -3 3 -2 11594 417 1
 -3 3 -2 11034 426 1
 -4 -3 -2 154 31 1
 4 -3 2 152 34 1
 -4 -3 -2 210 42 1
 -4 3 -2 217 36 1
 4 3 2 151 32 1
 -4 3 -2 216 36 1
 5 -3 2 1949 107 1
 -5 -3 -2 2124 106 1
 -5 -3 -2 2150 117 1
 -5 3 -2 2197 110 1
 5 3 2 2156 108 1
 -5 3 -2 2083 106 1
 -6 -3 -2 11150 420 1
 -6 -3 -2 10432 393 1
 6 -3 2 10531 406 1
 6 3 2 11157 406 1
 -6 3 -2 10887 397 1
 7 -3 2 6859 288 1
 -7 -3 -2 6868 303 1
 -7 -3 -2 7241 285 1
 7 3 2 7221 288 1
 -7 3 -2 7093 286 1
 -8 -3 -2 1856 121 1
 -8 -3 -2 1981 109 1
 8 -3 2 2082 109 1
 8 3 2 1933 107 1
 -8 3 -2 1962 114 1
 -8 3 -2 1649 113 1
 -9 -3 -2 1167 103 1
 -9 -3 -2 1152 86 1
 9 -3 2 1211 82 1
 9 3 2 1219 80 1
 -9 3 -2 1130 90 1
 -9 3 -2 1100 87 1
 10 -3 2 1098 81 1
 -10 -3 -2 1180 108 1
 -10 -3 -2 1066 89 1
 -10 3 -2 1165 92 1
 10 3 2 1062 79 1
 -10 3 -2 1118 101 1
 -11 -3 -2 212 49 1
 -11 -3 -2 226 65 1
 -11 3 -2 182 49 1
 -11 3 -2 200 57 1
 -12 -3 -2 242 70 1
 -12 -3 -2 244 54 1
 -12 3 -2 299 57 1
 -12 3 -2 263 66 1
 -13 -3 -2 122 52 1
 -13 -3 -2 76 60 1
 -13 3 -2 109 46 1
 -14 -3 -2 303 65 1
 -14 3 -2 69 53 1
 -14 -4 2 184 53 1
 -14 -4 2 138 68 1
 -14 4 2 195 59 1
 -14 4 2 247 69 1
 -13 -4 2 786 85 1
 -13 -4 2 644 92 1
 -13 4 2 829 93 1
 -12 -4 2 343 73 1
 -12 -4 2 289 57 1
 -12 4 2 304 73 1
 -12 4 2 277 60 1
 -11 -4 2 205 52 1
 -11 -4 2 148 63 1
 -11 4 2 200 57 1
 -11 4 2 183 51 1
 -10 -4 2 656 92 1
 -10 -4 2 696 80 1
 -10 4 2 841 93 1
 -10 4 2 744 80 1
 -9 -4 2 1073 90 1
 -9 -4 2 1350 110 1
 -9 4 2 1200 101 1
 -9 4 2 1279 90 1
 -8 -4 2 553 67 1
 -8 -4 2 433 66 1
 -8 4 2 693 79 1
 -8 4 2 686 72 1
 -7 -4 2 1098 78 1
 7 -4 -2 1180 62 1
 -7 -4 2 868 88 1
 -7 4 2 1109 77 1
 -7 4 2 1262 94 1
 7 4 -2 944 54 1
 -6 -4 2 3539 160 1
 6 -4 -2 3560 142 1
 -6 -4 2 3778 179 1
 6 4 -2 3415 136 1
 -6 4 2 3465 172 1
 -6 4 2 3504 157 1
 -5 -4 2 217 50 1
 5 -4 -2 235 29 1
 -5 -4 2 147 38 1
 -5 4 2 217 40 1
 -5 4 2 264 51 1
 4 -4 -2 12430 434 1
 -4 -4 2 12511 461 1
 -4 -4 2 11959 434 1
 -4 4 2 12975 461 1
 -4 4 2 12430 432 1
 -3 -4 2 1934 103 1
 -3 -4 2 2174 118 1
 -3 4 2 1558 109 1
 -3 4 2 1582 95 1
 -2 -4 2 4128 164 1
 -2 -4 2 3977 153 1
 -2 4 2 4124 146 1
 -2 4 2 4061 164 1
 -1 -4 2 5064 209 1
 -1 4 2 4724 212 1
 0 -4 2 35 21 1
 0 4 2 19 19 1
 0 4 2 27 22 1
 1 -4 2 8415 302 1
 -1 -4 -2 8644 308 1
 1 4 2 9249 303 1
 -2 -4 -2 1853 81 1
 2 -4 2 1809 77 1
 -2 -4 -2 1771 63 1
 2 4 2 1940 76 1
 -2 4 -2 1929 70 1
 3 -4 2 566 55 1
 -3 -4 -2 452 52 1
 -3 -4 -2 655 46 1
 -3 4 -2 704 47 1
 3 4 2 535 50 1
 -3 4 -2 657 51 1
 4 -4 2 317 40 1
 -4 -4 -2 304 37 1
 -4 -4 -2 301 44 1
 -4 4 -2 210 32 1
 -4 4 -2 163 31 1
 4 4 2 258 36 1
 -5 -4 -2 2966 149 1
 5 -4 2 3051 142 1
 -5 -4 -2 3008 135 1
 -5 4 -2 2697 136 1
 5 4 2 2765 136 1
 -5 4 -2 2880 137 1
 6 -4 2 2827 138 1
 -6 -4 -2 2985 153 1
 -6 -4 -2 3213 139 1
 6 4 2 3060 138 1
 -6 4 -2 2994 140 1
 -6 4 -2 3136 143 1
 -7 -4 -2 14342 515 1
 7 -4 2 14725 530 1
 -7 -4 -2 14475 546 1
 -7 4 -2 11586 525 1
 7 4 2 14156 526 1
 -7 4 -2 13758 516 1
 8 -4 2 326 47 1
 -8 -4 -2 279 58 1
 -8 -4 -2 289 47 1
 8 4 2 228 43 1
 -8 4 -2 281 49 1
 -9 -4 -2 22 33 1
 9 -4 2 67 34 1
 -9 -4 -2 77 46 1
 -9 4 -2 0 25 1
 9 4 2 78 34 1
 -9 4 -2 78 39 1
 -10 -4 -2 493 65 1
 10 -4 2 725 72 1
 -10 -4 -2 895 98 1
 -10 4 -2 551 72 1
 -10 4 -2 685 82 1
 10 4 2 514 62 1
 -11 -4 -2 934 103 1
 -11 -4 -2 851 81 1
 -11 4 -2 794 90 1
 -11 4 -2 706 80 1
 -12 -4 -2 133 61 1
 -12 -4 -2 109 47 1
 -12 4 -2 94 55 1
 -12 4 -2 188 53 1
 -13 -4 -2 21 43 1
 -13 4 -2 122 52 1
 -14 -4 -2 87 53 1
 -14 4 -2 27 48 1
 -14 -5 2 639 94 1
 -14 -5 2 546 97 1
 -14 5 2 458 71 1
 -13 -5 2 131 54 1
 -13 -5 2 86 63 1
 -13 5 2 90 44 1
 -13 5 2 82 59 1
 -12 -5 2 687 77 1
 -12 -5 2 678 98 1
 -12 5 2 993 93 1
 -12 5 2 756 93 1
 -11 -5 2 488 70 1
 -11 -5 2 506 85 1
 -11 5 2 369 72 1
 -11 5 2 402 65 1
 -10 -5 2 1167 112 1
 -10 -5 2 894 86 1
 -10 5 2 1203 100 1
 -10 5 2 987 90 1
 -9 -5 2 651 82 1
 -9 -5 2 639 71 1
 -9 5 2 481 72 1
 -9 5 2 701 71 1
 -8 -5 2 7222 303 1
 -8 -5 2 7601 329 1
 -8 5 2 7830 326 1
 -8 5 2 7417 303 1
 -7 -5 2 1166 101 1
 7 -5 -2 1088 60 1
 -7 -5 2 880 71 1
 -7 5 2 903 83 1
 7 5 -2 1026 53 1
 -7 5 2 1069 77 1
 -6 -5 2 6949 299 1
 -6 -5 2 6899 278 1
 6 -5 -2 7200 265 1
 -6 5 2 6722 293 1
 -6 5 2 6727 274 1
 6 5 -2 6695 258 1
 -5 -5 2 1004 70 1
 5 -5 -2 951 55 1
 -5 -5 2 958 76 1
 -5 5 2 856 64 1
 -5 5 2 1046 79 1
 -4 -5 2 496 64 1
 4 -5 -2 492 44 1
 -4 -5 2 344 48 1
 -4 5 2 559 50 1
 -4 5 2 554 62 1
 -3 -5 2 51154 1830 1
 -3 -5 2 50770 1752 1
 -3 5 2 50410 1828 1
 -3 5 2 49356 1813 1
 -3 5 2 49938 1746 1
 -2 -5 2 9005 335 1
 -2 5 2 8983 335 1
 -2 5 2 9094 311 1
 -2 5 2 8652 327 1
 -1 -5 2 34 21 1
 -1 5 2 0 9 1
 -1 5 2 23 22 1
 0 -5 -2 692 51 1
 0 -5 2 748 49 1
 0 5 2 886 53 1
 0 5 2 790 49 1
 -1 -5 -2 2959 114 1
 1 -5 2 2935 108 1
 1 5 2 2760 106 1
 2 -5 2 1801 106 1
 -2 -5 -2 1945 93 1
 -2 -5 -2 1829 112 1
 2 5 2 2012 106 1
 -2 5 -2 2077 103 1
 -3 -5 -2 2416 100 1
 3 -5 2 2372 112 1
 -3 -5 -2 2467 116 1
 3 5 2 2139 105 1
 -3 5 -2 2210 104 1
 -3 5 -2 2102 96 1
 -4 -5 -2 827 75 1
 -4 -5 -2 1017 65 1
 4 -5 2 886 69 1
 4 5 2 1106 69 1
 -4 5 -2 989 64 1
 -4 5 -2 983 66 1
 -5 -5 -2 1519 86 1
 5 -5 2 1557 92 1
 -5 -5 -2 1592 102 1
 5 5 2 1750 91 1
 -5 5 -2 1666 90 1
 -5 5 -2 1786 93 1
 6 -5 2 4420 203 1
 -6 -5 -2 4558 198 1
 -6 -5 -2 4438 215 1
 -6 5 -2 4876 204 1
 -6 5 -2 4705 200 1
 6 5 2 4524 200 1
 -7 -5 -2 10174 392 1
 -7 -5 -2 10654 421 1
 7 -5 2 9989 401 1
 -7 5 -2 10139 395 1
 -7 5 -2 10046 404 1
 7 5 2 10080 399 1
 -8 -5 -2 2309 137 1
 8 -5 2 2292 120 1
 -8 -5 -2 2412 124 1
 -8 5 -2 2279 126 1
 8 5 2 2190 117 1
 -8 5 -2 2346 124 1
 -9 -5 -2 661 70 1
 9 -5 2 513 61 1
 -9 -5 -2 557 78 1
 -9 5 -2 718 75 1
 9 5 2 670 64 1
 10 -5 2 779 69 1
 -10 -5 -2 543 62 1
 -10 -5 -2 710 84 1
 10 5 2 523 58 1
 -10 5 -2 542 65 1
 -11 -5 -2 440 62 1
 -11 -5 -2 475 79 1
 -11 5 -2 585 71 1
 -11 5 -2 383 61 1
 -12 -5 -2 77 54 1
 -12 -5 -2 113 51 1
 -12 5 -2 150 51 1
 -13 -5 -2 210 60 1
 -13 5 -2 167 59 1
 -14 -5 -2 9 49 1
 -14 5 -2 14 50 1
 -14 -6 2 739 95 1
 -14 6 2 905 103 1
 -13 -6 2 303 66 1
 -13 -6 2 146 65 1
 -13 6 2 241 70 1
 -13 6 2 229 52 1
 -12 -6 2 1315 108 1
 -12 -6 2 1155 118 1
 -12 6 2 1263 103 1
 -12 6 2 1216 116 1
 -11 -6 2 176 47 1
 -11 -6 2 107 53 1
 -11 6 2 162 57 1
 -11 6 2 117 44 1
 -10 -6 2 638 82 1
 -10 -6 2 579 66 1
 -10 6 2 548 68 1
 -10 6 2 654 80 1
 -9 -6 2 37 46 1
 -9 -6 2 70 37 1
 -9 6 2 78 40 1
 -9 6 2 105 45 1
 -8 -6 2 6712 278 1
 -8 -6 2 6385 296 1
 -8 6 2 6621 292 1
 -8 6 2 6743 276 1
 7 -6 -2 3527 147 1
 -7 -6 2 3188 160 1
 -7 -6 2 3307 180 1
 -7 6 2 3406 161 1
 7 6 -2 3457 140 1
 -7 6 2 3381 175 1
 -6 -6 2 2379 125 1
 -6 -6 2 2314 136 1
 6 -6 -2 2542 110 1
 6 6 -2 2290 101 1
 -6 6 2 2265 119 1
 -6 6 2 2628 137 1
 -5 -6 2 896 72 1
 -5 -6 2 901 86 1
 5 -6 -2 885 62 1
 -5 6 2 1164 76 1
 -5 6 2 1024 84 1
 -4 -6 2 17220 620 1
 -4 -6 2 17013 652 1
 4 -6 -2 17820 632 1
 -4 6 2 17425 650 1
 -4 6 2 17353 616 1
 -3 -6 2 49118 1764 1
 -3 -6 2 49906 1841 1
 -3 6 2 50547 1829 1
 -3 6 2 51593 1840 1
 -3 6 2 51520 1758 1
 -2 -6 2 2479 107 1
 -2 6 2 2309 89 1
 -2 6 2 2066 101 1
 -2 6 2 2199 105 1
 -1 -6 2 3251 140 1
 -1 -6 2 3332 137 1
 -1 6 2 3111 140 1
 -1 6 2 3264 145 1
 0 -6 2 2357 103 1
 0 -6 -2 2422 108 1
 0 6 2 2182 102 1
 1 -6 2 11817 412 1
 -1 -6 -2 12123 417 1
 1 6 2 11486 408 1
 2 -6 2 172 34 1
 -2 -6 -2 181 37 1
 -2 -6 -2 189 26 1
 2 6 2 374 42 1
 -3 -6 -2 215 39 1
 3 -6 2 194 36 1
 -3 -6 -2 232 30 1
 -3 6 -2 181 26 1
 3 6 2 157 29 1
 -3 6 -2 194 34 1
 -4 -6 -2 663 68 1
 4 -6 2 578 59 1
 -4 -6 -2 639 52 1
 -4 6 -2 664 57 1
 4 6 2 792 58 1
 -4 6 -2 683 51 1
 -5 -6 -2 460 56 1
 5 -6 2 476 51 1
 -5 -6 -2 504 50 1
 -5 6 -2 398 44 1
 5 6 2 393 45 1
 -5 6 -2 342 43 1
 -6 -6 -2 9519 390 1
 -6 -6 -2 9653 364 1
 6 -6 2 9429 375 1
 -6 6 -2 9227 372 1
 6 6 2 9515 372 1
 -6 6 -2 9696 366 1
 -7 -6 -2 18837 674 1
 -7 -6 -2 18842 713 1
 7 -6 2 18762 696 1
 7 6 2 18685 692 1
 -7 6 -2 18704 697 1
 -7 6 -2 18612 677 1
 -8 -6 -2 5469 230 1
 -8 -6 -2 5567 252 1
 8 -6 2 5344 232 1
 8 6 2 5648 231 1
 -8 6 -2 5621 234 1
 -8 6 -2 5499 238 1
 -9 -6 -2 137 51 1
 9 -6 2 195 46 1
 -9 -6 -2 132 41 1
 -9 6 -2 81 43 1
 -9 6 -2 112 47 1
 9 6 2 70 35 1
 10 -6 2 20 35 1
 -10 -6 -2 17 35 1
 -10 -6 -2 9 49 1
 -10 6 -2 22 39 1
 -10 6 -2 2 34 1
 10 6 2 37 34 1
 -11 -6 -2 237 53 1
 -11 -6 -2 350 76 1
 -11 6 -2 280 57 1
 -12 -6 -2 16 53 1
 -12 -6 -2 0 40 1
 -12 6 -2 23 42 1
 -13 -6 -2 167 72 1
 -13 -6 -2 193 50 1
 -13 6 -2 133 54 1
 -14 -6 -2 0 64 1
 -14 6 -2 12 47 1
 -14 -7 2 1138 117 1
 -14 7 2 1186 114 1
 -13 -7 2 433 69 1
 -13 -7 2 462 90 1
 -13 7 2 415 71 1
 -12 -7 2 394 89 1
 -12 -7 2 329 70 1
 -12 7 2 512 76 1
 -12 7 2 375 77 1
 -11 -7 2 160 47 1
 -11 -7 2 207 67 1
 -11 7 2 106 45 1
 -11 7 2 55 50 1
 -10 -7 2 1224 92 1
 -10 -7 2 1301 121 1
 -10 7 2 1316 93 1
 -10 7 2 1071 102 1
 -9 -7 2 335 69 1
 -9 -7 2 331 57 1
 -9 7 2 502 62 1
 -9 7 2 372 64 1
 8 -7 -2 5018 209 1
 -8 -7 2 5204 226 1
 -8 -7 2 4754 241 1
 -8 7 2 5334 224 1
 -8 7 2 5232 239 1
 -7 -7 2 4521 197 1
 -7 -7 2 4631 216 1
 7 -7 -2 4332 181 1
 -7 7 2 4479 195 1
 -7 7 2 4449 209 1
 7 7 -2 4184 173 1
 -6 -7 2 679 82 1
 -6 -7 2 765 72 1
 6 -7 -2 590 51 1
 -6 7 2 932 69 1
 6 7 -2 675 46 1
 -6 7 2 748 79 1
 -5 -7 2 199 50 1
 -5 -7 2 171 37 1
 5 -7 -2 205 33 1
 -5 7 2 79 29 1
 5 7 -2 76 22 1
 -5 7 2 247 49 1
 -4 -7 2 62210 2082 1
 -4 -7 2 62700 2174 1
 -4 7 2 60050 2153 1
 -4 7 2 59676 2168 1
 -4 7 2 60743 2076 1
 -3 -7 2 19734 684 1
 -3 -7 2 19388 715 1
 -3 7 2 18310 674 1
 -3 7 2 18258 706 1
 -3 7 2 18672 712 1
 -2 -7 2 587 58 1
 -2 7 2 524 43 1
 -2 7 2 462 53 1
 2 7 -2 560 48 1
 -2 7 2 517 57 1
 -1 -7 2 11038 413 1
 -1 7 2 10671 388 1
 -1 7 2 11084 419 1
 -1 7 2 10866 417 1
 0 -7 -2 12420 438 1
 0 -7 2 12498 433 1
 0 7 2 11916 432 1
 -1 -7 -2 1026 68 1
 1 -7 2 973 63 1
 1 7 2 1002 63 1
 -2 -7 -2 1288 77 1
 -2 -7 -2 1191 53 1
 2 -7 2 1280 72 1
 2 7 2 1093 66 1
 -3 -7 -2 1062 76 1
 -3 -7 -2 1034 59 1
 3 -7 2 958 69 1
 -3 7 -2 835 62 1
 3 7 2 811 62 1
 -4 -7 -2 1182 72 1
 -4 -7 -2 1058 86 1
 4 -7 2 994 74 1
 -4 7 -2 1192 77 1
 4 7 2 1289 78 1
 -4 7 -2 1284 70 1
 5 -7 2 1000 76 1
 -5 -7 -2 1071 72 1
 -5 -7 -2 1092 88 1
 5 7 2 880 69 1
 -5 7 -2 919 69 1
 -5 7 -2 1005 72 1
 -6 -7 -2 15781 625 1
 -6 -7 -2 16958 591 1
 6 -7 2 16378 612 1
 -6 7 -2 15719 592 1
 -6 7 -2 15970 606 1
 6 7 2 16247 607 1
 7 -7 2 6657 280 1
 -7 -7 -2 6690 297 1
 -7 -7 -2 6808 273 1
 -7 7 -2 7179 281 1
 -7 7 -2 7004 278 1
 7 7 2 7090 277 1
 -8 -7 -2 192 49 1
 8 -7 2 178 41 1
 -8 -7 -2 230 46 1
 -8 7 -2 239 49 1
 8 7 2 240 43 1
 -8 7 -2 262 47 1
 9 -7 2 2294 119 1
 -9 -7 -2 1942 135 1
 -9 -7 -2 2009 114 1
 -9 7 -2 2039 122 1
 -9 7 -2 1873 114 1
 9 7 2 1999 110 1
 10 -7 2 795 75 1
 -10 -7 -2 783 79 1
 -10 -7 -2 803 98 1
 -10 7 -2 744 80 1
 10 7 2 787 75 1
 -10 7 -2 828 85 1
 -11 -7 -2 546 86 1
 -11 -7 -2 442 68 1
 -11 7 -2 439 70 1
 -12 -7 -2 455 83 1
 -12 -7 -2 343 64 1
 -12 7 -2 426 69 1
 -13 -7 -2 1722 124 1
 -13 7 -2 1676 115 1
 -14 -7 -2 0 46 1
 -14 7 -2 64 55 1
 -14 -8 2 74 47 1
 -14 -8 2 146 73 1
 -14 8 2 220 62 1
 -13 -8 2 826 98 1
 -13 -8 2 827 115 1
 -13 8 2 898 94 1
 -12 -8 2 260 56 1
 -12 -8 2 403 79 1
 -12 8 2 330 73 1
 -12 8 2 365 64 1
 -11 -8 2 25 46 1
 -11 -8 2 34 38 1
 -11 8 2 1 46 1
 -11 8 2 25 42 1
 -10 -8 2 691 86 1
 -10 -8 2 590 68 1
 -10 8 2 684 82 1
 -10 8 2 703 76 1
 -9 -8 2 707 88 1
 -9 -8 2 620 72 1
 -9 8 2 740 82 1
 -9 8 2 583 67 1
 -8 -8 2 1813 127 1
 -8 -8 2 1781 111 1
 8 -8 -2 1763 93 1
 -8 8 2 1790 120 1
 -8 8 2 1545 106 1
 -7 -8 2 416 62 1
 -7 -8 2 447 59 1
 7 -8 -2 407 43 1
 7 8 -2 435 37 1
 -7 8 2 332 48 1
 -7 8 2 371 61 1
 -6 -8 2 489 68 1
 6 -8 -2 584 50 1
 -6 -8 2 547 62 1
 -6 8 2 451 63 1
 6 8 -2 563 42 1
 -6 8 2 554 59 1
 5 -8 -2 847 62 1
 -5 -8 2 923 83 1
 -5 -8 2 867 71 1
 -5 8 2 774 73 1
 5 8 -2 654 51 1
 -5 8 2 755 64 1
 -4 -8 2 21158 752 1
 -4 -8 2 21647 791 1
 -4 8 2 20531 745 1
 -4 8 2 20694 775 1
 4 8 -2 20299 761 1
 -4 8 2 20826 784 1
 -3 -8 2 722 73 1
 -3 -8 2 789 67 1
 3 8 -2 845 61 1
 -3 8 2 1064 77 1
 -3 8 2 899 75 1
 -3 8 2 895 61 1
 -2 -8 2 6 27 1
 -2 8 2 13 12 1
 -2 8 2 74 21 1
 -2 8 2 27 28 1
 2 8 -2 55 25 1
 -1 -8 2 11212 451 1
 -1 8 2 12065 459 1
 -1 8 2 11237 458 1
 -1 8 2 11583 426 1
 1 8 -2 11559 454 1
 0 -8 2 142 34 1
 0 -8 -2 129 34 1
 0 8 2 195 36 1
 1 -8 2 4359 189 1
 -1 -8 -2 4431 193 1
 1 8 2 4271 187 1
 -2 -8 -2 11130 428 1
 -2 -8 -2 11274 392 1
 2 -8 2 10619 422 1
 2 8 2 11623 420 1
 -3 -8 -2 5159 212 1
 3 -8 2 4999 206 1
 -3 -8 -2 5191 186 1
 3 8 2 5260 201 1
 -3 8 -2 5404 197 1
 4 -8 2 3469 157 1
 -4 -8 -2 3363 164 1
 -4 -8 -2 3628 144 1
 4 8 2 3299 149 1
 -4 8 -2 3068 146 1
 -4 8 -2 3392 140 1
 -5 -8 -2 2602 142 1
 5 -8 2 2384 128 1
 -5 -8 -2 2444 120 1
 -5 8 -2 2924 131 1
 -5 8 -2 2849 123 1
 5 8 2 2815 127 1
 6 -8 2 10966 417 1
 -6 -8 -2 10947 429 1
 -6 -8 -2 10680 399 1
 -6 8 -2 10499 402 1
 6 8 2 10493 409 1
 -6 8 -2 10619 407 1
 7 -8 2 25601 939 1
 -7 -8 -2 25283 956 1
 -7 -8 -2 24981 905 1
 -7 8 -2 25639 911 1
 -7 8 -2 25947 937 1
 7 8 2 25785 934 1
 8 -8 2 265 47 1
 -8 -8 -2 285 61 1
 -8 -8 -2 313 53 1
 8 8 2 304 46 1
 -8 8 -2 279 49 1
 -8 8 -2 251 46 1
 9 -8 2 1307 88 1
 -9 -8 -2 1317 108 1
 -9 -8 -2 1279 91 1
 -9 8 -2 1186 91 1
 -9 8 -2 1193 92 1
 9 8 2 1225 84 1
 10 -8 2 2632 132 1
 -10 -8 -2 2439 133 1
 -10 -8 -2 2611 155 1
 -10 8 -2 2491 140 1
 -10 8 -2 2240 132 1
 -11 -8 -2 853 91 1
 -11 -8 -2 955 110 1
 -11 8 -2 894 94 1
 -12 -8 -2 366 78 1
 -12 -8 -2 301 59 1
 -12 8 -2 339 63 1
 -13 -8 -2 1563 123 1
 -13 -8 -2 1613 141 1
 -13 8 -2 1931 127 1
 -14 -8 -2 94 56 1
 -14 8 -2 1 53 1
 -14 -9 2 258 69 1
 -14 9 2 320 61 1
 -13 -9 2 173 68 1
 -13 -9 2 69 45 1
 -13 9 2 79 53 1
 -13 9 2 86 60 1
 -12 -9 2 319 78 1
 -12 -9 2 281 62 1
 -12 9 2 357 66 1
 -12 9 2 299 74 1
 -11 -9 2 53 42 1
 -11 -9 2 59 58 1
 -11 9 2 0 39 1
 -11 9 2 44 48 1
 -10 -9 2 701 92 1
 -10 -9 2 638 74 1
 -10 9 2 694 88 1
 -10 9 2 628 71 1
 -9 -9 2 1297 115 1
 -9 -9 2 1302 100 1
 -9 9 2 1436 110 1
 -9 9 2 1552 103 1
 -8 -9 2 632 68 1
 -8 -9 2 712 81 1
 8 -9 -2 845 60 1
 -8 9 2 778 82 1
 -8 9 2 820 77 1
 7 -9 -2 184 35 1
 -7 -9 2 189 52 1
 -7 -9 2 193 45 1
 -7 9 2 226 51 1
 7 9 -2 197 31 1
 -7 9 2 416 54 1
 -6 -9 2 3149 160 1
 6 -9 -2 3092 137 1
 -6 -9 2 2817 145 1
 -6 9 2 3312 145 1
 -6 9 2 3162 156 1
 6 9 -2 3183 129 1
 -5 -9 2 1671 104 1
 5 -9 -2 1728 86 1
 -5 -9 2 1514 89 1
 -5 9 2 1214 89 1
 5 9 -2 1410 72 1
 -5 9 2 1298 81 1
 -4 -9 2 4609 192 1
 -4 -9 2 4808 208 1
 -4 9 2 4962 203 1
 -4 9 2 4901 198 1
 4 9 -2 4746 184 1
 -4 9 2 5102 188 1
 -3 -9 2 4682 222 1
 3 9 -2 5341 211 1
 -3 9 2 5635 226 1
 -3 9 2 5557 228 1
 -3 9 2 5282 205 1
 -2 -9 2 11 25 1
 -2 9 2 4 26 1
 -2 9 2 18 20 1
 2 9 -2 7 24 1
 -2 9 2 4 23 1
 -1 -9 2 5848 250 1
 -1 9 2 6445 258 1
 1 9 -2 6304 255 1
 -1 9 2 6406 261 1
 0 -9 2 289 42 1
 0 -9 -2 170 36 1
 0 9 2 260 42 1
 1 -9 2 4 26 1
 -1 -9 -2 72 31 1
 1 9 2 21 27 1
 2 -9 2 720 64 1
 -2 -9 -2 759 70 1
 -2 -9 -2 761 48 1
 2 9 2 709 58 1
 -3 -9 -2 2071 103 1
 -3 -9 -2 2090 124 1
 3 -9 2 1851 114 1
 -3 9 -2 2201 111 1
 3 9 2 2380 116 1
 -4 -9 -2 5078 207 1
 4 -9 2 4813 197 1
 -4 -9 -2 4721 180 1
 -4 9 -2 4586 187 1
 4 9 2 4521 190 1
 -4 9 -2 4559 177 1
 -5 -9 -2 7489 271 1
 5 -9 2 6987 285 1
 -5 -9 -2 7452 300 1
 -5 9 -2 6511 273 1
 -5 9 -2 6430 268 1
 5 9 2 6455 276 1
 6 -9 2 595 67 1
 -6 -9 -2 443 69 1
 -6 -9 -2 446 55 1
 -6 9 -2 632 67 1
 6 9 2 525 57 1
 -6 9 -2 581 57 1
 -7 -9 -2 5464 247 1
 7 -9 2 5370 229 1
 -7 -9 -2 5262 222 1
 7 9 2 5293 223 1
 -7 9 -2 5382 227 1
 -7 9 -2 5496 225 1
 8 -9 2 4105 185 1
 -8 -9 -2 3838 178 1
 -8 -9 -2 4192 204 1
 8 9 2 3951 178 1
 -8 9 -2 3871 183 1
 -8 9 -2 3609 179 1
 -9 -9 -2 754 89 1
 -9 -9 -2 661 72 1
 9 -9 2 777 72 1
 9 9 2 689 65 1
 -9 9 -2 603 68 1
 -9 9 -2 529 64 1
 -10 -9 -2 70 40 1
 -10 -9 -2 38 50 1
 10 -9 2 108 39 1
 -10 9 -2 95 45 1
 -10 9 -2 18 36 1
 -11 -9 -2 247 71 1
 -11 -9 -2 366 63 1
 -11 9 -2 406 67 1
 -12 -9 -2 74 59 1
 -12 -9 -2 0 39 1
 -12 9 -2 64 47 1
 -13 -9 -2 1147 108 1
 -13 -9 -2 940 118 1
 -13 9 -2 996 102 1
 -14 -9 -2 465 69 1
 -14 9 -2 508 74 1
 -14 -10 2 405 70 1
 -14 -10 2 349 89 1
 -14 10 2 534 81 1
 -13 -10 2 404 88 1
 -13 -10 2 371 74 1
 -13 10 2 441 73 1
 -13 10 2 496 86 1
 -12 -10 2 3091 189 1
 -12 -10 2 2638 162 1
 -12 10 2 2758 167 1
 -12 10 2 2825 156 1
 -11 -10 2 80 55 1
 -11 -10 2 112 49 1
 -11 10 2 128 55 1
 -11 10 2 44 41 1
 -10 -10 2 1729 130 1
 -10 -10 2 1807 112 1
 -10 10 2 1899 124 1
 -10 10 2 1810 114 1
 -9 -10 2 139 41 1
 -9 -10 2 122 56 1
 -9 10 2 120 43 1
 -9 10 2 23 43 1
 -8 -10 2 1663 107 1
 -8 -10 2 1676 122 1
 8 -10 -2 1628 91 1
 -8 10 2 1632 115 1
 -8 10 2 1534 102 1
 -7 -10 2 21 38 1
 -7 -10 2 17 29 1
 7 -10 -2 18 27 1
 7 10 -2 12 23 1
 -7 10 2 0 35 1
 -7 10 2 7 30 1
 6 -10 -2 1783 93 1
 -6 -10 2 1675 112 1
 -6 -10 2 1856 104 1
 -6 10 2 1809 99 1
 6 10 -2 1574 84 1
 -6 10 2 1647 106 1
 -5 -10 2 1098 86 1
 5 -10 -2 1266 79 1
 -5 -10 2 1181 80 1
 5 10 -2 1480 71 1
 -5 10 2 1275 86 1
 -5 10 2 1346 78 1
 -4 -10 2 411 58 1
 -4 -10 2 489 54 1
 -4 10 2 402 53 1
 4 10 -2 375 42 1
 -4 10 2 328 42 1
 -4 10 2 424 54 1
 -3 -10 2 5821 249 1
 -3 10 2 5902 227 1
 -3 10 2 5675 245 1
 3 10 -2 5582 235 1
 -2 -10 2 12573 459 1
 2 10 -2 12188 454 1
 -2 10 2 12312 430 1
 -2 10 2 12112 466 1
 -2 10 2 12891 460 1
 -1 -10 2 2232 106 1
 -1 10 2 2317 113 1
 1 10 -2 2322 113 1
 -1 10 2 2120 116 1
 0 -10 2 418 51 1
 0 -10 -2 383 48 1
 0 10 2 409 50 1
 1 -10 2 9853 373 1
 -1 -10 -2 9904 377 1
 1 10 2 9961 371 1
 -2 -10 -2 6795 255 1
 2 -10 2 6422 280 1
 -2 -10 -2 6454 285 1
 2 10 2 7387 280 1
 -3 -10 -2 1470 77 1
 -3 -10 -2 1559 100 1
 3 -10 2 1484 94 1
 3 10 2 1108 80 1
 4 -10 2 5799 253 1
 -4 -10 -2 5842 233 1
 -4 -10 -2 5592 258 1
 4 10 2 6126 247 1
 -4 10 -2 6347 232 1
 -4 10 -2 6441 245 1
 5 -10 2 3655 176 1
 -5 -10 -2 4239 196 1
 -5 -10 -2 4122 169 1
 5 10 2 3766 173 1
 -5 10 -2 4117 175 1
 -5 10 -2 4086 166 1
 -6 -10 -2 990 85 1
 6 -10 2 1046 77 1
 -6 -10 -2 907 69 1
 -6 10 -2 997 68 1
 6 10 2 897 69 1
 -6 10 -2 920 75 1
 7 -10 2 12093 478 1
 -7 -10 -2 12188 460 1
 -7 -10 -2 11946 493 1
 7 10 2 12330 471 1
 -7 10 -2 12731 470 1
 -7 10 -2 12951 467 1
 8 -10 2 8825 360 1
 -8 -10 -2 8838 380 1
 -8 -10 -2 8782 350 1
 8 10 2 9072 354 1
 -8 10 -2 9192 358 1
 -8 10 -2 9290 356 1
 -9 -10 -2 257 49 1
 9 -10 2 395 55 1
 -9 -10 -2 378 67 1
 -9 10 -2 287 53 1
 -9 10 -2 257 62 1
 9 10 2 324 48 1
 -10 -10 -2 31 46 1
 10 -10 2 1 34 1
 -10 -10 -2 45 41 1
 -10 10 -2 1 34 1
 -11 -10 -2 877 88 1
 -11 -10 -2 817 105 1
 -11 10 -2 795 89 1
 -12 -10 -2 814 88 1
 -12 -10 -2 654 95 1
 -12 10 -2 675 81 1
 -13 -10 -2 333 83 1
 -13 -10 -2 471 72 1
 -13 10 -2 442 72 1
 -14 -10 -2 378 74 1
 -14 -10 -2 242 80 1
 -14 10 -2 377 78 1
 -14 -11 2 903 112 1
 -14 11 2 916 99 1
 -13 -11 2 325 64 1
 -13 -11 2 414 90 1
 -13 11 2 302 80 1
 -13 11 2 398 71 1
 -12 -11 2 2350 167 1
 -12 -11 2 2515 146 1
 -12 11 2 2676 148 1
 -12 11 2 2775 164 1
 -11 -11 2 1028 97 1
 -11 -11 2 1089 115 1
 -11 11 2 861 88 1
 -11 11 2 863 95 1
 -10 -11 2 72 55 1
 -10 -11 2 14 35 1
 -10 11 2 58 49 1
 -10 11 2 42 37 1
 -9 -11 2 386 58 1
 -9 -11 2 302 63 1
 -9 11 2 430 68 1
 -9 11 2 341 54 1
 -8 -11 2 99 51 1
 -8 -11 2 46 37 1
 8 -11 -2 62 31 1
 -8 11 2 49 36 1
 -8 11 2 39 42 1
 -7 -11 2 1870 112 1
 -7 -11 2 2056 130 1
 7 -11 -2 1788 101 1
 -7 11 2 1996 119 1
 7 11 -2 1895 94 1
 -7 11 2 2066 110 1
 -6 -11 2 67 40 1
 6 -11 -2 56 30 1
 -6 -11 2 63 31 1
 6 11 -2 145 31 1
 -6 11 2 127 41 1
 -6 11 2 120 35 1
 5 -11 -2 555 55 1
 -5 -11 2 614 63 1
 -5 -11 2 618 72 1
 -5 11 2 439 57 1
 -5 11 2 394 49 1
 5 11 -2 404 44 1
 -4 -11 2 2403 138 1
 -4 -11 2 2465 131 1
 -4 11 2 2691 135 1
 -4 11 2 2828 125 1
 4 11 -2 2539 122 1
 -4 11 2 2770 138 1
 -3 -11 2 6673 255 1
 -3 11 2 5773 246 1
 -3 11 2 5805 228 1
 3 11 -2 5579 239 1
 -2 -11 2 1415 85 1
 -2 11 2 1359 72 1
 -2 11 2 1559 97 1
 2 11 -2 1379 84 1
 -2 11 2 1568 86 1
 -1 -11 2 2819 136 1
 -1 11 2 2983 142 1
 -1 11 2 2843 148 1
 1 11 -2 3004 145 1
 0 -11 -2 1217 80 1
 0 -11 2 1169 80 1
 0 -11 2 1235 62 1
 0 11 2 1108 80 1
 0 11 -2 1162 81 1
 -1 -11 -2 3304 161 1
 1 -11 2 3423 160 1
 1 11 2 3247 153 1
 -2 -11 -2 23451 819 1
 -2 -11 -2 22717 873 1
 2 -11 2 22843 869 1
 2 11 2 21342 862 1
 -3 -11 -2 4362 179 1
 3 -11 2 4378 200 1
 -3 -11 -2 4354 206 1
 3 11 2 4387 195 1
 -4 -11 -2 4883 224 1
 -4 -11 -2 5272 203 1
 4 -11 2 4787 218 1
 -4 11 -2 4858 195 1
 4 11 2 5053 213 1
 -4 11 -2 4744 207 1
 -5 -11 -2 5167 233 1
 5 -11 2 4808 218 1
 -5 -11 -2 5040 204 1
 -5 11 -2 4806 209 1
 -5 11 -2 5237 202 1
 5 11 2 4758 211 1
 -6 -11 -2 265 44 1
 6 -11 2 343 54 1
 -6 -11 -2 444 71 1
 6 11 2 560 58 1
 -6 11 -2 417 47 1
 -6 11 -2 381 57 1
 -7 -11 -2 10603 441 1
 7 -11 2 10527 423 1
 -7 -11 -2 10865 407 1
 -7 11 -2 10860 413 1
 7 11 2 10814 417 1
 -7 11 -2 10716 412 1
 8 -11 2 573 64 1
 -8 -11 -2 502 58 1
 -8 -11 -2 431 67 1
 -8 11 -2 419 53 1
 8 11 2 497 58 1
 -8 11 -2 404 56 1
 -9 -11 -2 1172 86 1
 9 -11 2 1167 90 1
 -9 -11 -2 1292 119 1
 -9 11 -2 1146 90 1
 9 11 2 1160 83 1
 -9 11 -2 1199 92 1
 -10 -11 -2 494 67 1
 -10 -11 -2 522 83 1
 10 -11 2 470 61 1
 -10 11 -2 504 69 1
 -11 -11 -2 335 61 1
 -11 -11 -2 436 82 1
 -11 11 -2 457 71 1
 -12 -11 -2 196 70 1
 -12 -11 -2 184 53 1
 -12 11 -2 124 47 1
 -13 -11 -2 1691 122 1
 -13 -11 -2 1489 144 1
 -13 11 -2 1622 114 1
 -14 -11 -2 213 62 1
 -14 11 -2 239 68 1
 -14 -12 2 691 99 1
 -14 -12 2 572 89 1
 -14 12 2 689 93 1
 -13 -12 2 292 74 1
 -13 12 2 523 76 1
 -12 -12 2 509 79 1
 -12 -12 2 501 82 1
 -12 12 2 551 89 1
 -12 12 2 565 74 1
 -11 -12 2 350 61 1
 -11 -12 2 357 83 1
 -11 12 2 558 82 1
 -11 12 2 356 65 1
 -10 -12 2 99 49 1
 -10 -12 2 113 46 1
 -10 12 2 78 49 1
 -10 12 2 234 52 1
 -9 -12 2 1137 114 1
 -9 -12 2 875 83 1
 -9 12 2 1083 98 1
 -9 12 2 962 86 1
 -8 -12 2 1278 90 1
 8 -12 -2 1227 80 1
 -8 -12 2 1132 100 1
 -8 12 2 1070 92 1
 -8 12 2 960 87 1
 -7 -12 2 1480 97 1
 7 -12 -2 1473 87 1
 -7 -12 2 1348 109 1
 7 12 -2 1301 77 1
 -7 12 2 1447 91 1
 -7 12 2 1419 101 1
 -6 -12 2 2339 127 1
 6 -12 -2 2157 119 1
 -6 -12 2 2149 134 1
 -6 12 2 2369 120 1
 -6 12 2 2172 129 1
 6 12 -2 2382 111 1
 -5 -12 2 1752 120 1
 5 -12 -2 1731 107 1
 -5 -12 2 1672 107 1
 -5 12 2 1722 110 1
 -5 12 2 1732 101 1
 5 12 -2 1869 98 1
 -4 -12 2 244 48 1
 -4 -12 2 274 48 1
 -4 12 2 234 39 1
 -4 12 2 322 49 1
 4 12 -2 303 43 1
 -4 12 2 262 48 1
 -3 -12 2 250 45 1
 -3 12 2 389 50 1
 -3 12 2 343 40 1
 3 12 -2 363 47 1
 -3 12 2 330 56 1
 -2 -12 2 2529 127 1
 2 12 -2 2534 130 1
 -2 12 2 2648 129 1
 -2 12 2 2627 115 1
 -2 12 2 2657 142 1
 -1 -12 2 565 52 1
 1 -12 -2 489 54 1
 1 12 -2 647 61 1
 -1 12 2 695 58 1
 -1 12 2 548 60 1
 0 -12 2 25724 961 1
 0 -12 -2 25720 979 1
 0 12 -2 26030 984 1
 0 12 2 24935 980 1
 -1 -12 -2 1768 104 1
 1 -12 2 1879 104 1
 1 12 2 1708 99 1
 2 -12 2 30359 1102 1
 -2 -12 -2 30099 1104 1
 2 12 2 29498 1094 1
 -3 -12 -2 24035 812 1
 -3 -12 -2 23128 865 1
 3 -12 2 22674 859 1
 3 12 2 23373 852 1
 -4 -12 -2 2841 150 1
 -4 -12 -2 2898 127 1
 4 -12 2 2858 144 1
 4 12 2 2860 137 1
 -4 12 -2 2870 119 1
 -4 12 -2 3042 138 1
 -5 -12 -2 2283 109 1
 5 -12 2 2177 120 1
 -5 -12 -2 1954 125 1
 -5 12 -2 2166 101 1
 5 12 2 2102 112 1
 -5 12 -2 2264 116 1
 6 -12 2 877 76 1
 -6 -12 -2 1149 102 1
 -6 -12 -2 883 67 1
 6 12 2 764 68 1
 -6 12 -2 728 61 1
 -6 12 -2 722 74 1
 7 -12 2 1926 119 1
 -7 -12 -2 1904 111 1
 -7 -12 -2 1878 133 1
 -7 12 -2 2272 120 1
 7 12 2 2023 111 1
 -7 12 -2 2126 110 1
 -8 -12 -2 1297 113 1
 8 -12 2 1321 100 1
 -8 -12 -2 1517 98 1
 -8 12 -2 1519 103 1
 8 12 2 1629 96 1
 -8 12 -2 1387 92 1
 9 -12 2 1530 105 1
 -9 -12 -2 1836 131 1
 -9 -12 -2 1624 107 1
 9 12 2 1686 102 1
 -9 12 -2 1691 108 1
 -10 -12 -2 2120 145 1
 -10 -12 -2 1845 119 1
 10 -12 2 1872 120 1
 -10 12 -2 1867 121 1
 -11 -12 -2 413 79 1
 -11 -12 -2 467 70 1
 -11 12 -2 647 78 1
 -12 -12 -2 141 68 1
 -12 -12 -2 82 49 1
 -12 12 -2 85 44 1
 -13 -12 -2 2685 180 1
 -13 -12 -2 2359 152 1
 -13 12 -2 2306 152 1
 -14 -12 -2 93 52 1
 -14 12 -2 197 58 1
 -14 -13 2 987 122 1
 -14 -13 2 933 97 1
 -14 13 2 837 95 1
 -13 -13 2 245 61 1
 -13 -13 2 511 94 1
 -13 13 2 443 72 1
 -12 -13 2 274 77 1
 -12 -13 2 120 53 1
 -12 13 2 272 57 1
 -12 13 2 193 60 1
 -11 -13 2 262 59 1
 -11 -13 2 469 81 1
 -11 13 2 323 62 1
 -11 13 2 445 72 1
 -10 -13 2 169 61 1
 -10 -13 2 185 52 1
 -10 13 2 84 41 1
 -10 13 2 137 53 1
 -9 -13 2 3611 204 1
 -9 -13 2 3845 182 1
 -9 13 2 3715 190 1
 -9 13 2 3579 177 1
 8 -13 -2 1274 87 1
 -8 -13 2 1303 93 1
 -8 -13 2 1275 109 1
 -8 13 2 1195 96 1
 -8 13 2 1167 94 1
 7 -13 -2 582 58 1
 -7 -13 2 397 64 1
 -7 -13 2 482 59 1
 -7 13 2 472 56 1
 -7 13 2 451 60 1
 7 13 -2 432 47 1
 6 -13 -2 4887 216 1
 -6 -13 2 5044 236 1
 -6 -13 2 4849 215 1
 -6 13 2 4999 224 1
 6 13 -2 5230 206 1
 -6 13 2 4857 209 1
 -5 -13 2 2551 127 1
 -5 -13 2 2648 142 1
 -5 13 2 2722 135 1
 -5 13 2 2407 119 1
 -5 13 2 2530 130 1
 5 13 -2 2650 120 1
 -4 -13 2 926 79 1
 -4 -13 2 878 69 1
 -4 13 2 886 70 1
 4 13 -2 970 66 1
 -4 13 2 799 60 1
 -3 -13 2 3126 155 1
 -3 13 2 3117 138 1
 3 13 -2 3108 149 1
 -3 13 2 3076 150 1
 -3 13 2 2866 160 1
 -2 -13 2 786 64 1
 2 13 -2 816 70 1
 -2 13 2 814 80 1
 -2 13 2 665 61 1
 -1 -13 2 3837 164 1
 1 -13 -2 3813 171 1
 1 13 -2 3887 176 1
 -1 13 2 3754 180 1
 0 -13 2 534 42 1
 0 -13 -2 537 55 1
 0 13 2 657 64 1
 0 13 -2 317 49 1
 1 -13 2 668 69 1
 -1 -13 -2 505 58 1
 1 13 2 654 65 1
 -2 -13 -2 1258 90 1
 2 -13 2 1225 89 1
 2 13 2 897 74 1
 3 -13 2 5907 255 1
 -3 -13 -2 5906 259 1
 -3 -13 -2 6101 230 1
 3 13 2 6112 249 1
 -4 -13 -2 752 59 1
 -4 -13 -2 960 92 1
 4 -13 2 763 78 1
 4 13 2 683 65 1
 -4 13 -2 748 49 1
 -5 -13 -2 690 80 1
 5 -13 2 841 75 1
 -5 -13 -2 886 68 1
 -5 13 -2 997 61 1
 -5 13 -2 1033 78 1
 5 13 2 1021 73 1
 -6 -13 -2 293 64 1
 6 -13 2 380 57 1
 -6 -13 -2 340 51 1
 -6 13 -2 515 62 1
 6 13 2 462 57 1
 -6 13 -2 481 51 1
 -7 -13 -2 2152 112 1
 -7 -13 -2 2018 133 1
 7 -13 2 1929 118 1
 -7 13 -2 2083 107 1
 -7 13 -2 2071 117 1
 7 13 2 2254 114 1
 -8 -13 -2 39 50 1
 8 -13 2 79 39 1
 -8 -13 -2 102 39 1
 8 13 2 62 35 1
 -8 13 -2 86 37 1
 -8 13 -2 45 35 1
 -9 -13 -2 2645 169 1
 9 -13 2 2915 151 1
 -9 -13 -2 3050 150 1
 9 13 2 2841 144 1
 -9 13 -2 2759 151 1
 10 -13 2 172 46 1
 -10 -13 -2 145 60 1
 -10 -13 -2 66 43 1
 -10 13 -2 150 48 1
 -11 -13 -2 103 58 1
 -11 -13 -2 103 48 1
 -11 13 -2 206 55 1
 -12 -13 -2 2736 151 1
 -12 -13 -2 2503 176 1
 -12 13 -2 2693 147 1
 -13 -13 -2 1279 137 1
 -13 -13 -2 1347 119 1
 -13 13 -2 1612 121 1
 -14 13 -2 457 85 1
 -14 -14 2 287 84 1
 -14 14 2 237 58 1
 -13 -14 2 337 74 1
 -13 -14 2 229 74 1
 -13 14 2 202 59 1
 -12 -14 2 335 69 1
 -12 -14 2 181 73 1
 -12 14 2 166 51 1
 -12 14 2 316 70 1
 -11 -14 2 174 65 1
 -11 -14 2 278 59 1
 -11 14 2 138 46 1
 -11 14 2 191 59 1
 -10 -14 2 589 74 1
 -10 -14 2 403 81 1
 -10 14 2 560 69 1
 -10 14 2 557 77 1
 -9 -14 2 3001 177 1
 -9 -14 2 3032 163 1
 -9 14 2 3233 169 1
 -9 14 2 3201 158 1
 8 -14 -2 1313 92 1
 -8 -14 2 1309 97 1
 -8 -14 2 1341 115 1
 -8 14 2 1440 97 1
 -8 14 2 1460 104 1
 -7 -14 2 195 43 1
 7 -14 -2 134 39 1
 -7 -14 2 12 47 1
 -7 14 2 153 37 1
 7 14 -2 139 34 1
 -7 14 2 138 44 1
 -6 -14 2 3520 168 1
 6 -14 -2 3690 169 1
 -6 -14 2 3287 181 1
 6 14 -2 3390 155 1
 -6 14 2 3475 161 1
 -6 14 2 3239 167 1
 -5 -14 2 1727 107 1
 -5 -14 2 1772 118 1
 -5 14 2 1585 109 1
 -5 14 2 1539 95 1
 -5 14 2 1466 103 1
 5 14 -2 1549 95 1
 -4 -14 2 579 65 1
 -4 -14 2 559 60 1
 4 14 -2 590 57 1
 -4 14 2 644 61 1
 -4 14 2 572 53 1
 -3 -14 2 1437 92 1
 -3 14 2 1163 81 1
 -3 14 2 1278 98 1
 -3 14 2 1162 74 1
 3 14 -2 1156 84 1
 -2 -14 2 1134 75 1
 2 14 -2 977 79 1
 -2 14 2 926 91 1
 -2 14 2 942 71 1
 -1 -14 2 90 31 1
 1 -14 -2 119 35 1
 1 14 -2 74 36 1
 -1 14 2 127 47 1
 0 -14 2 749 51 1
 0 -14 -2 786 66 1
 0 14 2 823 79 1
 0 14 -2 659 69 1
 1 -14 2 29637 1073 1
 -1 -14 -2 29251 1071 1
 1 14 2 28687 1068 1
 -2 -14 -2 13610 524 1
 2 -14 2 12962 522 1
 2 14 2 13945 518 1
 -3 -14 -2 1017 66 1
 -3 -14 -2 1284 91 1
 3 -14 2 1075 83 1
 3 14 2 1142 75 1
 -4 -14 -2 1676 86 1
 -4 -14 -2 1621 109 1
 4 -14 2 1605 104 1
 -4 14 -2 1489 73 1
 4 14 2 1533 95 1
 5 -14 2 2699 143 1
 -5 -14 -2 2770 154 1
 -5 -14 -2 2942 130 1
 -5 14 -2 2523 117 1
 5 14 2 2681 134 1
 -5 14 -2 2762 137 1
 -6 -14 -2 485 54 1
 -6 -14 -2 469 71 1
 6 -14 2 495 62 1
 -6 14 -2 361 56 1
 -6 14 -2 347 42 1
 6 14 2 320 48 1
 -7 -14 -2 2803 137 1
 -7 -14 -2 2764 161 1
 7 -14 2 2568 146 1
 -7 14 -2 2595 140 1
 7 14 2 2701 137 1
 -7 14 -2 2633 130 1
 -8 -14 -2 2601 164 1
 -8 -14 -2 2663 141 1
 8 -14 2 2781 149 1
 8 14 2 2691 139 1
 -8 14 -2 2869 148 1
 9 -14 2 694 76 1
 -9 -14 -2 610 84 1
 -9 -14 -2 756 76 1
 9 14 2 743 71 1
 -9 14 -2 808 79 1
 10 -14 2 269 54 1
 -10 -14 -2 249 49 1
 -10 -14 -2 283 68 1
 -10 14 -2 199 49 1
 -11 -14 -2 5040 250 1
 -11 -14 -2 4699 219 1
 -11 14 -2 4868 223 1
 -12 -14 -2 1330 112 1
 -12 -14 -2 1412 140 1
 -12 14 -2 1559 115 1
 -13 -14 -2 159 75 1
 -13 -14 -2 199 56 1
 -13 14 -2 221 63 1
 -14 -14 -2 229 62 1
 -14 14 -2 346 73 1
 -14 -15 2 302 73 1
 -14 -15 2 254 79 1
 -14 15 2 179 64 1
 -13 -15 2 1611 126 1
 -13 -15 2 1492 147 1
 -13 15 2 1557 118 1
 -12 -15 2 1406 112 1
 -12 -15 2 1724 139 1
 -12 15 2 1817 115 1
 -11 -15 2 853 91 1
 -11 -15 2 799 95 1
 -11 15 2 783 91 1
 -11 15 2 1168 98 1
 -10 -15 2 83 40 1
 -10 -15 2 4 51 1
 -10 15 2 80 41 1
 -10 15 2 33 45 1
 -9 -15 2 3671 186 1
 -9 -15 2 3863 205 1
 -9 15 2 3486 181 1
 -9 15 2 3719 174 1
 -8 -15 2 2768 144 1
 -8 -15 2 2443 154 1
 8 -15 -2 2781 140 1
 -8 15 2 2530 138 1
 -8 15 2 2603 148 1
 -7 -15 2 319 62 1
 7 -15 -2 417 57 1
 -7 -15 2 355 57 1
 -7 15 2 408 57 1
 -7 15 2 478 63 1
 7 15 -2 379 48 1
 -6 -15 2 1965 128 1
 -6 -15 2 2029 116 1
 6 -15 -2 1909 114 1
 -6 15 2 1986 114 1
 6 15 -2 1952 103 1
 -6 15 2 1982 108 1
 -5 -15 2 2118 128 1
 -5 -15 2 2185 138 1
 -5 15 2 2513 131 1
 5 15 -2 2243 121 1
 -5 15 2 2228 120 1
 -4 -15 2 1788 110 1
 -4 15 2 1882 104 1
 4 15 -2 1806 100 1
 -4 15 2 1976 117 1
 -4 15 2 1663 91 1
 -3 -15 2 1957 112 1
 -3 15 2 1863 97 1
 -3 15 2 1798 104 1
 -3 15 2 1925 124 1
 3 15 -2 1964 111 1
 -2 -15 2 355 49 1
 -2 15 2 491 67 1
 2 15 -2 405 56 1
 -2 15 2 423 50 1
 -1 -15 2 883 65 1
 1 -15 -2 956 70 1
 1 15 -2 1308 85 1
 -1 15 2 1283 91 1
 0 -15 2 15187 565 1
 0 -15 -2 15231 583 1
 0 15 2 15390 590 1
 0 15 -2 15328 592 1
 1 -15 2 11767 443 1
 -1 -15 -2 12368 442 1
 1 15 2 11341 438 1
 -1 15 -2 11005 442 1
 2 -15 2 34188 1218 1
 -2 -15 -2 34551 1219 1
 2 15 2 32477 1207 1
 3 -15 2 1209 87 1
 -3 -15 -2 1398 75 1
 -3 -15 -2 1052 88 1
 3 15 2 1576 86 1
 -4 -15 -2 1430 81 1
 -4 -15 -2 1538 101 1
 4 -15 2 1475 97 1
 4 15 2 1205 86 1
 -4 15 -2 1387 67 1
 5 -15 2 2726 146 1
 -5 -15 -2 2545 126 1
 -5 -15 -2 2801 155 1
 5 15 2 2427 133 1
 -5 15 -2 2643 117 1
 -5 15 -2 2522 135 1
 -6 -15 -2 308 65 1
 6 -15 2 328 58 1
 -6 -15 -2 246 43 1
 6 15 2 194 43 1
 -6 15 -2 262 49 1
 -6 15 -2 253 36 1
 7 -15 2 79 44 1
 -7 -15 -2 80 50 1
 -7 -15 -2 48 33 1
 -7 15 -2 51 31 1
 7 15 2 0 32 1
 -7 15 -2 37 34 1
 -8 -15 -2 582 82 1
 8 -15 2 435 61 1
 -8 -15 -2 536 63 1
 -8 15 -2 357 55 1
 8 15 2 379 53 1
 -9 -15 -2 426 76 1
 -9 -15 -2 567 66 1
 9 -15 2 722 76 1
 9 15 2 559 63 1
 -9 15 -2 481 67 1
 -10 -15 -2 48 40 1
 -10 -15 -2 16 52 1
 10 -15 2 57 42 1
 -10 15 -2 40 38 1
 -11 -15 -2 2562 151 1
 -11 -15 -2 2772 179 1
 -11 15 -2 2938 157 1
 -12 -15 -2 2135 137 1
 -12 -15 -2 2228 164 1
 -12 15 -2 2229 140 1
 -13 -15 -2 438 97 1
 -13 -15 -2 596 86 1
 -13 15 -2 575 82 1
 -14 15 -2 427 71 1
 -14 -16 2 2249 157 1
 -14 -16 2 2243 165 1
 -14 16 2 2115 145 1
 -13 -16 2 3036 201 1
 -13 -16 2 3163 172 1
 -13 16 2 3284 172 1
 -12 -16 2 1329 121 1
 -12 -16 2 1165 131 1
 -12 16 2 1240 106 1
 -11 -16 2 463 81 1
 -11 -16 2 418 69 1
 -11 16 2 442 70 1
 -11 16 2 477 72 1
 -10 -16 2 294 69 1
 -10 -16 2 320 61 1
 -10 16 2 283 60 1
 -10 16 2 159 48 1
 -9 -16 2 4849 230 1
 -9 -16 2 5011 252 1
 -9 16 2 5131 233 1
 -9 16 2 5403 227 1
 -8 -16 2 9110 373 1
 -8 -16 2 9780 404 1
 8 -16 -2 9252 374 1
 -8 16 2 9481 383 1
 -8 16 2 9537 368 1
 7 -16 -2 96 39 1
 -7 -16 2 45 49 1
 -7 -16 2 86 41 1
 7 16 -2 18 30 1
 -7 16 2 129 41 1
 -7 16 2 87 40 1
 6 -16 -2 58 38 1
 -6 -16 2 62 35 1
 -6 -16 2 13 42 1
 6 16 -2 7 29 1
 -6 16 2 44 33 1
 -6 16 2 7 29 1
 -5 -16 2 3234 167 1
 -5 -16 2 3031 152 1
 -5 16 2 2928 143 1
 -5 16 2 3028 152 1
 5 16 -2 3075 148 1
 -4 -16 2 2305 125 1
 -4 16 2 1767 99 1
 -4 16 2 1665 104 1
 4 16 -2 1563 104 1
 -4 16 2 1730 123 1
 -3 -16 2 1737 112 1
 -3 16 2 1730 124 1
 3 16 -2 1956 114 1
 -3 16 2 1843 107 1
 -2 -16 2 3598 163 1
 -2 16 2 3414 159 1
 -2 16 2 3345 179 1
 2 16 -2 3158 167 1
 -1 -16 2 224 40 1
 1 -16 -2 308 49 1
 1 16 -2 106 44 1
 -1 16 2 190 51 1
 0 -16 2 14949 544 1
 0 -16 -2 14396 561 1
 0 16 2 14441 569 1
 0 16 -2 14778 571 1
 -1 -16 -2 4584 202 1
 1 -16 2 4791 210 1
 1 -16 2 4277 173 1
 1 16 2 4138 198 1
 -1 16 -2 4484 206 1
 -2 -16 -2 13446 525 1
 2 -16 2 12981 525 1
 2 16 2 13789 520 1
 -3 -16 -2 14762 598 1
 3 -16 2 16138 603 1
 -3 -16 -2 16535 561 1
 3 16 2 15209 589 1
 4 -16 2 1020 86 1
 -4 -16 -2 973 93 1
 -4 -16 -2 906 69 1
 4 16 2 1061 78 1
 -4 16 -2 1024 55 1
 -5 -16 -2 1371 82 1
 5 -16 2 1458 99 1
 -5 -16 -2 1276 104 1
 5 16 2 1364 88 1
 -5 16 -2 1276 70 1
 -6 -16 -2 1843 133 1
 -6 -16 -2 2018 110 1
 6 -16 2 1875 121 1
 6 16 2 2151 117 1
 -6 16 -2 2051 100 1
 -6 16 -2 2112 117 1
 7 -16 2 706 81 1
 -7 -16 -2 878 80 1
 -7 -16 -2 977 107 1
 7 16 2 826 75 1
 -7 16 -2 949 83 1
 -8 -16 -2 249 66 1
 8 -16 2 303 57 1
 -8 -16 -2 309 53 1
 -8 16 -2 274 55 1
 8 16 2 329 53 1
 9 -16 2 202 49 1
 -9 -16 -2 224 63 1
 -9 -16 -2 352 55 1
 9 16 2 256 47 1
 -9 16 -2 226 53 1
 -10 -16 -2 1 52 1
 10 -16 2 1 40 1
 -10 -16 -2 15 37 1
 -10 16 -2 1 39 1
 -11 -16 -2 7232 327 1
 -11 -16 -2 6428 293 1
 -11 16 -2 6950 294 1
 -12 -16 -2 105 53 1
 -12 -16 -2 89 72 1
 -12 16 -2 227 62 1
 -13 -16 -2 659 89 1
 -13 -16 -2 790 113 1
 -13 16 -2 743 87 1
 -14 16 -2 599 87 1
 -14 -17 2 2780 195 1
 -14 -17 2 2859 168 1
 -14 17 2 2956 168 1
 -13 -17 2 1425 147 1
 -13 -17 2 1408 131 1
 -13 17 2 1609 119 1
 -12 -17 2 197 55 1
 -12 -17 2 436 86 1
 -12 17 2 249 60 1
 -11 -17 2 139 60 1
 -11 -17 2 87 47 1
 -11 17 2 135 50 1
 -11 17 2 69 48 1
 -10 -17 2 321 58 1
 -10 -17 2 276 69 1
 -10 17 2 248 56 1
 -10 17 2 290 57 1
 -9 -17 2 732 77 1
 -9 -17 2 877 100 1
 -9 17 2 882 80 1
 -9 17 2 897 85 1
 -8 -17 2 7768 347 1
 8 -17 -2 8180 322 1
 -8 -17 2 8112 324 1
 -8 17 2 6453 317 1
 -8 17 2 8260 315 1
 -7 -17 2 624 69 1
 7 -17 -2 569 68 1
 -7 -17 2 604 86 1
 7 17 -2 733 64 1
 -7 17 2 667 70 1
 -7 17 2 334 56 1
 -6 -17 2 755 81 1
 -6 -17 2 952 101 1
 6 -17 -2 879 87 1
 -6 17 2 845 74 1
 6 17 -2 771 70 1
 -5 -17 2 3612 188 1
 -5 -17 2 3789 178 1
 -5 17 2 3733 168 1
 -5 17 2 3620 189 1
 5 17 -2 3688 173 1
 -4 -17 2 2806 151 1
 -4 17 2 3189 137 1
 -4 17 2 3301 166 1
 -4 17 2 2815 139 1
 4 17 -2 3185 147 1
 -3 -17 2 1390 96 1
 -3 17 2 1446 108 1
 3 17 -2 1361 93 1
 -3 17 2 1632 93 1
 -2 -17 2 183 41 1
 2 -17 -2 282 45 1
 2 17 -2 366 57 1
 -2 17 2 394 50 1
 -2 17 2 272 61 1
 -1 -17 2 16 26 1
 1 -17 -2 81 33 1
 -1 17 2 2 36 1
 1 17 -2 29 37 1
 0 -17 -2 270 46 1
 0 -17 2 221 35 1
 0 17 2 322 54 1
 0 17 -2 336 57 1
 1 -17 2 1636 85 1
 -1 -17 -2 1645 111 1
 1 17 2 1949 117 1
 -1 17 -2 1971 122 1
 2 -17 2 3181 163 1
 -2 -17 -2 2904 158 1
 2 17 2 3157 158 1
 -3 -17 -2 5945 230 1
 3 -17 2 5693 256 1
 -3 -17 -2 5390 253 1
 3 17 2 5668 247 1
 -4 -17 -2 220 52 1
 -4 -17 -2 188 37 1
 4 -17 2 183 49 1
 -4 17 -2 267 28 1
 4 17 2 223 45 1
 5 -17 2 487 65 1
 -5 -17 -2 556 58 1
 -5 -17 -2 495 70 1
 -5 17 -2 448 41 1
 5 17 2 437 57 1
 -6 -17 -2 1657 119 1
 6 -17 2 1509 111 1
 -6 -17 -2 1805 99 1
 -6 17 -2 1408 86 1
 -6 17 -2 1530 101 1
 6 17 2 1604 101 1
 7 -17 2 275 55 1
 -7 -17 -2 319 50 1
 -7 -17 -2 327 71 1
 7 17 2 327 54 1
 -7 17 -2 455 61 1
 -8 -17 -2 60 53 1
 8 -17 2 58 40 1
 -8 -17 -2 95 38 1
 -8 17 -2 34 34 1
 8 17 2 2 34 1
 -9 -17 -2 4462 233 1
 -9 -17 -2 4497 206 1
 9 -17 2 4430 213 1
 9 17 2 4608 206 1
 -9 17 -2 4155 206 1
 -10 -17 -2 237 74 1
 -10 -17 -2 287 57 1
 10 -17 2 247 57 1
 -10 17 -2 337 62 1
 -11 -17 -2 1132 100 1
 -11 -17 -2 978 114 1
 -11 17 -2 1349 105 1
 -12 -17 -2 2040 136 1
 -12 -17 -2 2123 161 1
 -12 17 -2 1817 132 1
 -13 -17 -2 597 98 1
 -13 -17 -2 574 84 1
 -13 17 -2 806 92 1
 -14 -17 -2 351 74 1
 -14 -17 -2 262 85 1
 -14 17 -2 317 77 1
 -14 -18 2 642 98 1
 -14 -18 2 691 110 1
 -14 18 2 824 94 1
 -13 -18 2 103 60 1
 -13 -18 2 145 77 1
 -13 18 2 222 61 1
 -12 -18 2 46 62 1
 -12 -18 2 22 49 1
 -12 18 2 7 46 1
 -11 -18 2 1087 115 1
 -11 -18 2 1261 111 1
 -11 18 2 1177 94 1
 -10 -18 2 359 64 1
 -10 -18 2 275 69 1
 -10 18 2 67 36 1
 -10 18 2 264 51 1
 -9 -18 2 3387 177 1
 -9 -18 2 3467 197 1
 -9 18 2 3314 167 1
 -8 -18 2 1087 99 1
 8 -18 -2 1015 85 1
 -8 -18 2 1212 115 1
 -8 18 2 821 82 1
 7 -18 -2 152 45 1
 -7 -18 2 74 49 1
 -7 -18 2 184 43 1
 7 18 -2 116 38 1
 -7 18 2 14 20 1
 -7 18 2 120 40 1
 -6 -18 2 2391 132 1
 -6 -18 2 2315 142 1
 6 -18 -2 2353 134 1
 6 18 -2 2268 120 1
 -6 18 2 2099 119 1
 -5 -18 2 4378 210 1
 -5 -18 2 4530 203 1
 -5 18 2 4239 212 1
 -5 18 2 4331 188 1
 5 18 -2 4454 197 1
 -4 -18 2 746 74 1
 -4 18 2 439 67 1
 4 18 -2 628 66 1
 -4 18 2 614 56 1
 -3 -18 2 289 52 1
 3 18 -2 343 56 1
 -3 18 2 304 63 1
 -3 18 2 240 44 1
 -2 -18 2 138 37 1
 2 -18 -2 192 41 1
 2 18 -2 139 44 1
 -2 18 2 88 48 1
 -1 -18 2 2162 113 1
 1 -18 -2 2068 117 1
 1 18 -2 2181 129 1
 -1 18 2 2243 135 1
 0 -18 2 5740 229 1
 0 -18 -2 5430 243 1
 0 18 -2 5431 255 1
 0 18 2 5299 252 1
 -1 -18 -2 14682 566 1
 1 -18 2 14412 537 1
 -1 18 -2 14396 575 1
 1 18 2 14831 569 1
 2 -18 2 130 50 1
 2 -18 2 134 25 1
 -2 -18 -2 209 50 1
 2 18 2 159 47 1
 3 -18 2 5113 235 1
 -3 -18 -2 4937 232 1
 3 18 2 5090 228 1
 4 -18 2 3095 163 1
 -4 -18 -2 3135 143 1
 -4 -18 -2 2915 161 1
 -4 18 -2 3045 125 1
 4 18 2 3063 154 1
 -5 -18 -2 1358 110 1
 -5 -18 -2 1384 86 1
 5 -18 2 1235 100 1
 5 18 2 1478 96 1
 -5 18 -2 1445 73 1
 6 -18 2 1354 104 1
 -6 -18 -2 1485 91 1
 -6 -18 -2 1385 114 1
 6 18 2 1549 97 1
 -7 -18 -2 361 67 1
 7 -18 2 395 67 1
 -7 -18 -2 397 56 1
 7 18 2 504 62 1
 -7 18 -2 386 60 1
 8 -18 2 1044 92 1
 -8 -18 -2 993 103 1
 -8 -18 -2 1222 88 1
 -8 18 -2 1247 96 1
 8 18 2 1211 86 1
 -9 -18 -2 95 40 1
 -9 -18 -2 140 63 1
 9 -18 2 37 42 1
 9 18 2 144 44 1
 -9 18 -2 149 46 1
 -10 -18 -2 112 43 1
 -10 -18 -2 97 61 1
 -10 18 -2 106 50 1
 11 -18 2 2502 153 1
 -11 -18 -2 2530 178 1
 -11 -18 -2 2346 149 1
 -11 18 -2 2710 154 1
 -12 -18 -2 3283 208 1
 -12 -18 -2 3267 181 1
 -12 18 -2 3678 185 1
 -13 -18 -2 1 66 1
 -13 -18 -2 95 58 1
 -13 18 -2 97 55 1
 -13 -19 2 2923 177 1
 -13 -19 2 2525 183 1
 -13 19 2 2705 159 1
 -12 -19 2 112 69 1
 -12 -19 2 67 53 1
 -12 19 2 228 59 1
 -11 -19 2 347 72 1
 -11 -19 2 259 65 1
 -11 19 2 315 61 1
 -10 -19 2 58 40 1
 -10 -19 2 7 50 1
 -10 19 2 0 27 1
 -10 19 2 0 39 1
 -9 -19 2 4518 232 1
 -9 -19 2 4400 212 1
 -9 19 2 4370 203 1
 8 -19 -2 960 89 1
 -8 -19 2 1172 111 1
 -8 -19 2 928 87 1
 -8 19 2 967 79 1
 -7 -19 2 834 85 1
 -7 -19 2 775 90 1
 7 -19 -2 794 82 1
 7 19 -2 726 70 1
 -7 19 2 712 72 1
 -6 -19 2 4602 229 1
 -6 -19 2 4822 220 1
 6 -19 -2 4658 224 1
 6 19 -2 4818 212 1
 -6 19 2 4859 208 1
 -5 -19 2 7065 285 1
 -5 -19 2 6685 270 1
 5 19 -2 5970 262 1
 -5 19 2 6457 253 1
 -5 19 2 6163 282 1
 -4 -19 2 358 58 1
 -4 19 2 492 72 1
 4 19 -2 548 63 1
 -3 -19 2 2853 146 1
 -3 19 2 2624 134 1
 3 19 -2 2724 147 1
 -3 19 2 2516 159 1
 -2 -19 2 1068 80 1
 2 -19 -2 1085 77 1
 -2 19 2 1110 110 1
 2 19 -2 1006 88 1
 -1 -19 2 99 35 1
 1 -19 -2 46 33 1
 1 19 -2 22 34 1
 -1 19 2 76 43 1
 0 -19 -2 7039 291 1
 0 -19 2 6917 273 1
 0 19 -2 7114 303 1
 0 19 2 6796 301 1
 1 -19 2 12922 464 1
 -1 -19 -2 12583 490 1
 1 19 2 12282 493 1
 -1 19 -2 12080 499 1
 2 -19 2 5358 206 1
 2 -19 2 5363 245 1
 -2 -19 -2 5393 241 1
 2 19 2 5198 237 1
 -3 -19 -2 594 75 1
 3 -19 2 683 83 1
 3 -19 2 658 44 1
 3 19 2 660 75 1
 4 -19 2 614 73 1
 -4 -19 -2 624 74 1
 -4 -19 -2 688 64 1
 4 19 2 693 69 1
 -5 -19 -2 289 64 1
 -5 -19 -2 422 52 1
 5 -19 2 418 62 1
 5 19 2 483 63 1
 -6 -19 -2 141 41 1
 6 -19 2 104 48 1
 -6 -19 -2 80 57 1
 6 19 2 184 46 1
 7 -19 2 3790 199 1
 -7 -19 -2 3918 183 1
 -7 -19 -2 4394 218 1
 7 19 2 4072 189 1
 -7 19 -2 3847 188 1
 8 -19 2 119 45 1
 -8 -19 -2 126 57 1
 -8 -19 -2 147 44 1
 8 19 2 262 51 1
 -8 19 -2 211 51 1
 -9 -19 -2 455 82 1
 -9 -19 -2 522 68 1
 9 -19 2 483 72 1
 -9 19 -2 425 63 1
 9 19 2 414 61 1
 -10 -19 -2 916 110 1
 10 -19 2 939 92 1
 -10 -19 -2 1155 99 1
 -10 19 -2 1087 101 1
 11 -19 2 2745 163 1
 -11 -19 -2 2650 153 1
 -11 -19 -2 2925 185 1
 -11 19 -2 2601 155 1
 -12 -19 -2 2157 167 1
 -12 -19 -2 2384 150 1
 -12 19 -2 2670 153 1
 -13 -19 -2 51 71 1
 -13 -19 -2 70 53 1
 -13 19 -2 24 51 1
 -13 -20 2 1093 110 1
 -13 -20 2 1243 136 1
 -13 20 2 1177 110 1
 -12 -20 2 756 97 1
 -12 -20 2 702 89 1
 -12 20 2 987 98 1
 -11 -20 2 1020 112 1
 -11 -20 2 857 92 1
 -11 20 2 1102 100 1
 -10 -20 2 342 66 1
 -10 -20 2 177 63 1
 -10 20 2 142 45 1
 -9 -20 2 398 77 1
 -9 -20 2 442 68 1
 -9 20 2 360 57 1
 -9 20 2 340 60 1
 -8 -20 2 1854 126 1
 8 -20 -2 2130 128 1
 -8 -20 2 2128 148 1
 -8 20 2 1892 121 1
 -8 20 2 2183 123 1
 -7 -20 2 1088 109 1
 7 -20 -2 969 94 1
 -7 -20 2 1155 94 1
 -7 20 2 1018 83 1
 7 20 -2 1055 83 1
 -7 20 2 1154 85 1
 6 -20 -2 1456 105 1
 -6 -20 2 1452 107 1
 -6 -20 2 1227 95 1
 6 20 -2 1312 92 1
 -6 20 2 1391 88 1
 -6 20 2 1037 83 1
 -5 -20 2 9526 405 1
 -5 -20 2 9878 389 1
 -5 20 2 9646 411 1
 -5 20 2 9426 372 1
 5 20 -2 9944 392 1
 -4 -20 2 2384 141 1
 4 20 -2 2519 136 1
 -4 20 2 2353 151 1
 -3 -20 2 14896 552 1
 -3 20 2 13524 567 1
 3 20 -2 14480 554 1
 2 -20 -2 41789 1551 1
 -2 -20 2 42382 1553 1
 2 20 -2 43691 1568 1
 -2 20 2 45361 1582 1
 1 -20 -2 2171 125 1
 -1 -20 2 2276 122 1
 -1 20 2 2680 152 1
 1 20 -2 2506 144 1
 0 -20 2 662 57 1
 0 -20 -2 841 76 1
 0 20 -2 794 79 1
 0 20 2 669 76 1
 -1 -20 -2 85 40 1
 1 -20 2 128 29 1
 1 20 2 130 50 1
 -1 20 -2 53 44 1
 2 -20 2 1296 69 1
 2 -20 2 1241 100 1
 -2 -20 -2 1255 99 1
 2 20 2 1461 101 1
 -3 -20 -2 1362 105 1
 3 -20 2 1580 110 1
 3 -20 2 1618 73 1
 3 20 2 1305 99 1
 4 -20 2 89 46 1
 -4 -20 -2 48 30 1
 -4 -20 -2 15 38 1
 4 -20 2 46 20 1
 4 20 2 65 33 1
 5 -20 2 820 88 1
 -5 -20 -2 920 73 1
 -5 -20 -2 697 84 1
 5 20 2 745 80 1
 -6 -20 -2 1890 107 1
 6 -20 2 1867 121 1
 -6 -20 -2 1798 133 1
 6 20 2 1679 110 1
 -7 -20 -2 1053 83 1
 -7 -20 -2 1275 121 1
 7 -20 2 1093 104 1
 7 20 2 1471 97 1
 -8 -20 -2 50 38 1
 -8 -20 -2 0 51 1
 8 -20 2 22 39 1
 8 20 2 52 39 1
 -8 20 -2 2 34 1
 9 -20 2 1217 104 1
 -9 -20 -2 1126 117 1
 -9 -20 -2 1263 95 1
 -9 20 -2 1419 105 1
 9 20 2 1467 102 1
 -10 -20 -2 92 43 1
 -10 -20 -2 53 57 1
 10 -20 2 122 53 1
 -10 20 -2 59 46 1
 -11 -20 -2 2318 146 1
 -11 -20 -2 2287 159 1
 11 -20 2 2179 148 1
 -11 20 -2 2423 144 1
 -12 -20 -2 268 60 1
 -12 -20 -2 371 91 1
 -12 20 -2 310 62 1
 -13 -20 -2 123 54 1
 -13 -20 -2 111 78 1
 -13 20 -2 138 54 1
 -13 -21 2 191 75 1
 -13 21 2 342 71 1
 -12 -21 2 247 59 1
 -12 -21 2 253 77 1
 -12 21 2 319 62 1
 -11 -21 2 359 80 1
 -11 -21 2 173 55 1
 -11 21 2 291 60 1
 -10 -21 2 1689 114 1
 -10 -21 2 1613 144 1
 -10 21 2 1370 107 1
 -9 -21 2 1929 125 1
 -9 -21 2 1849 142 1
 -9 21 2 2174 125 1
 -9 21 2 1937 120 1
 -8 -21 2 2463 162 1
 -8 -21 2 2352 140 1
 8 -21 -2 2318 138 1
 -8 21 2 2579 137 1
 -8 21 2 2739 142 1
 -7 -21 2 1744 125 1
 -7 -21 2 1829 116 1
 7 -21 -2 1551 110 1
 -7 21 2 1462 99 1
 -7 21 2 1458 103 1
 7 21 -2 1432 102 1
 6 -21 -2 1592 115 1
 -6 -21 2 1720 119 1
 -6 -21 2 1654 114 1
 -6 21 2 1450 99 1
 -6 21 2 1593 101 1
 6 21 -2 1574 104 1
 -5 -21 2 3763 186 1
 -5 -21 2 3723 193 1
 -5 21 2 3609 174 1
 5 21 -2 3609 180 1
 -5 21 2 3869 201 1
 -4 -21 2 2664 138 1
 -4 21 2 1947 138 1
 4 21 -2 1812 120 1
 -3 -21 2 6714 287 1
 3 21 -2 6838 292 1
 -3 21 2 6375 303 1
 2 -21 -2 6590 276 1
 -2 -21 2 6759 280 1
 2 21 -2 6704 292 1
 -2 21 2 7012 305 1
 1 -21 -2 453 60 1
 -1 -21 2 427 54 1
 -1 21 2 483 71 1
 1 21 -2 540 73 1
 0 -21 -2 1598 104 1
 0 -21 2 1451 87 1
 0 21 2 1776 118 1
 0 21 -2 1512 112 1
 -1 -21 -2 122 39 1
 1 -21 2 101 28 1
 -1 21 -2 142 50 1
 1 21 2 150 50 1
 2 -21 2 1119 62 1
 2 -21 2 984 99 1
 -2 -21 -2 1007 88 1
 2 21 2 935 85 1
 3 -21 2 5482 206 1
 -3 -21 -2 5404 246 1
 3 -21 2 5221 249 1
 3 21 2 5622 243 1
 -4 -21 -2 977 72 1
 4 -21 2 877 91 1
 4 -21 2 868 53 1
 -4 -21 -2 1004 100 1
 4 21 2 847 83 1
 5 -21 2 690 82 1
 -5 -21 -2 551 82 1
 -5 -21 -2 747 67 1
 5 21 2 548 68 1
 6 -21 2 1265 103 1
 -6 -21 -2 1240 115 1
 -6 -21 -2 1143 82 1
 6 21 2 1078 88 1
 -7 -21 -2 2695 163 1
 -7 -21 -2 2514 133 1
 7 -21 2 2638 152 1
 7 21 2 2650 142 1
 8 -21 2 741 86 1
 -8 -21 -2 595 87 1
 -8 -21 -2 683 72 1
 8 21 2 659 73 1
 9 -21 2 325 69 1
 -9 -21 -2 354 58 1
 -9 -21 -2 557 88 1
 -9 21 -2 476 71 1
 9 21 2 372 59 1
 -10 -21 -2 437 87 1
 10 -21 2 567 78 1
 -10 -21 -2 514 73 1
 -10 21 -2 496 74 1
 -11 -21 -2 1475 139 1
 -11 -21 -2 1567 117 1
 -11 21 -2 1608 117 1
 -12 -21 -2 848 113 1
 -12 -21 -2 649 87 1
 -12 21 -2 577 85 1
 -13 -21 -2 867 96 1
 -13 -21 -2 884 116 1
 -13 21 -2 793 97 1
 -13 -22 2 456 94 1
 -13 -22 2 497 86 1
 -13 22 2 462 71 1
 -12 -22 2 307 86 1
 -12 -22 2 321 69 1
 -12 22 2 480 73 1
 -11 -22 2 1669 133 1
 -11 -22 2 1821 146 1
 -11 22 2 1732 114 1
 -10 -22 2 179 68 1
 -10 -22 2 94 51 1
 -10 22 2 99 49 1
 -9 -22 2 255 72 1
 -9 -22 2 121 52 1
 -9 22 2 246 56 1
 -9 22 2 172 45 1
 -8 -22 2 285 62 1
 8 -22 -2 223 56 1
 -8 -22 2 345 73 1
 -8 22 2 308 55 1
 -8 22 2 360 58 1
 -7 -22 2 3111 176 1
 7 -22 -2 2766 161 1
 -7 -22 2 2813 159 1
 -7 22 2 3109 154 1
 -7 22 2 3042 151 1
 -6 -22 2 644 82 1
 -6 -22 2 834 82 1
 6 -22 -2 876 91 1
 -6 22 2 502 62 1
 6 22 -2 632 70 1
 -6 22 2 560 67 1
 -6 22 2 602 81 1
 -5 -22 2 98 50 1
 5 22 -2 54 39 1
 -5 22 2 89 38 1
 -5 22 2 26 46 1
 -4 -22 2 3189 173 1
 -4 22 2 3158 187 1
 4 22 -2 3436 172 1
 3 -22 -2 1066 81 1
 -3 -22 2 736 82 1
 -3 22 2 999 109 1
 3 22 -2 826 88 1
 -2 -22 2 762 75 1
 2 -22 -2 816 71 1
 2 22 -2 1088 98 1
 -2 22 2 832 94 1
 -1 -22 2 17591 644 1
 1 -22 -2 16472 649 1
 1 22 -2 17554 668 1
 -1 22 2 16785 671 1
 0 -22 2 452 52 1
 0 -22 -2 530 63 1
 0 22 2 457 69 1
 0 22 -2 397 68 1
 1 -22 2 1205 71 1
 -1 -22 -2 1118 90 1
 1 22 2 1106 97 1
 -1 22 -2 1172 98 1
 2 -22 2 791 87 1
 2 -22 2 880 54 1
 -2 -22 -2 837 81 1
 2 22 2 830 85 1
 -2 22 -2 972 97 1
 3 -22 2 1526 116 1
 3 -22 2 1460 74 1
 -3 -22 -2 1520 111 1
 3 22 2 1500 103 1
 -4 -22 -2 3131 152 1
 -4 -22 -2 3084 174 1
 4 -22 2 3292 179 1
 4 22 2 3124 165 1
 -5 -22 -2 1088 79 1
 -5 -22 -2 1114 113 1
 5 -22 2 1160 107 1
 5 22 2 1115 90 1
 6 -22 2 582 78 1
 -6 -22 -2 568 66 1
 -6 -22 -2 552 86 1
 6 22 2 618 71 1
 7 -22 2 156 51 1
 -7 -22 -2 132 58 1
 -7 -22 -2 187 45 1
 7 22 2 94 40 1
 -8 -22 -2 2477 132 1
 8 -22 2 2146 140 1
 -8 -22 -2 2371 156 1
 8 22 2 2412 134 1
 -9 -22 -2 78 43 1
 -9 -22 -2 120 55 1
 9 -22 2 146 55 1
 -9 22 -2 121 49 1
 9 22 2 69 42 1
 -10 -22 -2 397 77 1
 10 -22 2 675 82 1
 -10 -22 -2 581 73 1
 -10 22 -2 609 79 1
 -11 -22 -2 1654 153 1
 11 -22 2 1330 123 1
 -11 -22 -2 1292 109 1
 -11 22 -2 1390 121 1
 -12 -22 -2 2236 147 1
 -12 -22 -2 2139 166 1
 -12 22 -2 2380 148 1
 -13 -22 -2 776 117 1
 -13 22 -2 765 98 1
 -13 -23 2 3145 209 1
 -13 -23 2 3152 192 1
 -13 23 2 3284 172 1
 -12 -23 2 234 66 1
 -12 -23 2 69 70 1
 -12 23 2 161 55 1
 -11 -23 2 176 67 1
 -11 -23 2 270 68 1
 -11 23 2 219 58 1
 -10 -23 2 1727 130 1
 -10 -23 2 1628 132 1
 -10 23 2 1502 109 1
 -9 -23 2 1736 118 1
 -9 -23 2 1415 120 1
 -9 23 2 1434 105 1
 -8 -23 2 849 92 1
 -8 -23 2 751 95 1
 8 -23 -2 794 87 1
 -8 23 2 640 77 1
 -8 23 2 620 74 1
 -7 -23 2 774 88 1
 -7 -23 2 896 102 1
 7 -23 -2 961 96 1
 -7 23 2 739 77 1
 -7 23 2 719 77 1
 -6 -23 2 1989 126 1
 -6 -23 2 1740 128 1
 6 -23 -2 1712 125 1
 6 23 -2 1680 113 1
 -6 23 2 1793 111 1
 -6 23 2 1713 129 1
 -5 -23 2 1030 103 1
 -5 23 2 1374 116 1
 5 23 -2 1194 95 1
 -5 23 2 1335 88 1
 -4 -23 2 3838 186 1
 4 23 -2 3683 184 1
 -4 23 2 3711 202 1
 -4 23 2 3435 166 1
 -3 -23 2 1993 124 1
 3 -23 -2 2111 120 1
 -3 23 2 2344 147 1
 3 23 -2 2371 136 1
 2 -23 -2 6571 276 1
 -2 -23 2 6536 279 1
 -2 23 2 6210 300 1
 2 23 -2 6679 294 1
 -1 -23 2 481 59 1
 1 -23 -2 567 63 1
 -1 23 2 772 90 1
 1 23 -2 578 76 1
 0 -23 2 1479 87 1
 0 -23 -2 1485 100 1
 0 23 -2 1332 105 1
 0 23 2 1394 113 1
 -1 -23 -2 3726 187 1
 1 -23 2 3771 163 1
 1 23 2 3881 196 1
 -1 23 -2 3792 201 1
 -2 -23 -2 1236 94 1
 2 -23 2 1287 101 1
 2 -23 2 1305 67 1
 -2 23 -2 1115 103 1
 2 23 2 1401 100 1
 -3 -23 -2 1522 112 1
 3 -23 2 1563 77 1
 3 -23 2 1585 118 1
 3 23 2 1381 107 1
 -4 -23 -2 3665 168 1
 4 -23 2 3550 192 1
 -4 -23 -2 3480 187 1
 4 23 2 3596 181 1
 -5 -23 -2 1654 122 1
 5 -23 2 1489 110 1
 -5 -23 -2 1629 99 1
 5 23 2 1425 102 1
 -6 -23 -2 183 62 1
 -6 -23 -2 181 43 1
 6 -23 2 238 60 1
 6 23 2 190 47 1
 7 -23 2 1843 130 1
 -7 -23 -2 1974 115 1
 -7 -23 -2 1855 139 1
 7 23 2 1966 119 1
 -8 -23 -2 2010 120 1
 -8 -23 -2 1675 137 1
 8 -23 2 1661 125 1
 8 23 2 1897 120 1
 -9 -23 -2 127 63 1
 9 -23 2 155 56 1
 -9 -23 -2 106 43 1
 9 23 2 213 52 1
 -10 -23 -2 541 92 1
 -10 -23 -2 485 71 1
 10 -23 2 546 76 1
 -10 23 -2 496 74 1
 -11 -23 -2 610 84 1
 -11 -23 -2 532 95 1
 -11 23 -2 598 83 1
 -12 -23 -2 328 92 1
 -12 -23 -2 420 74 1
 -12 23 -2 451 75 1
 -13 -23 -2 518 84 1
 -13 23 -2 504 81 1
 -13 -24 2 2203 154 1
 -13 -24 2 2151 168 1
 -13 24 2 2296 137 1
 -12 -24 2 4344 238 1
 -12 -24 2 3715 211 1
 -12 24 2 4050 203 1
 -11 -24 2 83 66 1
 -11 -24 2 69 51 1
 -11 24 2 38 45 1
 -10 -24 2 3189 182 1
 -10 -24 2 3052 193 1
 -10 24 2 3320 169 1
 -9 -24 2 8858 381 1
 -9 -24 2 8334 353 1
 9 -24 -2 8293 359 1
 -9 24 2 8000 337 1
 8 -24 -2 1157 98 1
 -8 -24 2 1134 94 1
 -8 -24 2 1006 106 1
 -8 24 2 1133 91 1
 -8 24 2 1118 99 1
 -7 -24 2 284 63 1
 -7 -24 2 337 63 1
 7 -24 -2 251 59 1
 -7 24 2 216 47 1
 -7 24 2 217 49 1
 -6 -24 2 1399 103 1
 -6 -24 2 1389 111 1
 6 24 -2 1137 91 1
 -6 24 2 1018 87 1
 -6 24 2 1058 109 1
 -5 -24 2 2847 160 1
 -5 24 2 2526 166 1
 5 24 -2 2589 149 1
 -5 24 2 2563 138 1
 -4 -24 2 193 50 1
 -4 24 2 259 67 1
 -4 24 2 271 46 1
 4 24 -2 307 60 1
 -3 -24 2 5561 258 1
 3 -24 -2 5925 251 1
 -3 24 2 5983 286 1
 3 24 -2 5959 268 1
 -2 -24 2 23709 889 1
 2 -24 -2 23271 884 1
 -2 24 2 24559 917 1
 2 24 -2 24094 905 1
 -1 -24 2 195 43 1
 1 -24 -2 263 48 1
 -1 24 2 366 67 1
 1 24 -2 308 60 1
 0 -24 2 97 34 1
 0 -24 -2 18 35 1
 0 24 2 12 52 1
 0 24 -2 135 51 1
 -1 -24 -2 10132 412 1
 1 -24 2 10191 385 1
 1 24 2 9924 421 1
 -1 24 -2 9570 423 1
 2 -24 2 3124 138 1
 2 -24 2 3244 182 1
 -2 -24 -2 3000 168 1
 -2 24 -2 3253 183 1
 2 24 2 3089 172 1
 3 -24 2 713 52 1
 -3 -24 -2 791 89 1
 3 -24 2 528 76 1
 3 24 2 645 77 1
 -4 -24 -2 1732 123 1
 -4 -24 -2 1693 105 1
 4 -24 2 1612 125 1
 4 24 2 1792 117 1
 5 -24 2 1523 120 1
 -5 -24 -2 1534 100 1
 -5 -24 -2 1409 121 1
 5 24 2 1716 115 1
 -6 -24 -2 6 45 1
 -6 -24 -2 28 33 1
 6 -24 2 70 47 1
 6 24 2 0 36 1
 -7 -24 -2 1585 128 1
 7 -24 2 1747 125 1
 -7 -24 -2 1617 105 1
 7 24 2 1711 112 1
 8 -24 2 334 69 1
 -8 -24 -2 499 83 1
 -8 -24 -2 331 59 1
 8 24 2 394 62 1
 -9 -24 -2 594 75 1
 9 -24 2 678 82 1
 -9 -24 -2 520 81 1
 9 24 2 492 70 1
 -10 -24 -2 35 41 1
 10 -24 2 81 54 1
 -10 -24 -2 152 61 1
 -11 -24 -2 186 58 1
 -11 -24 -2 172 75 1
 11 -24 2 151 58 1
 -12 -24 -2 1989 141 1
 -12 -24 -2 2328 163 1
 -12 24 -2 2509 151 1
 -13 -24 -2 145 62 1
 -13 -24 -2 55 74 1
 -13 24 -2 204 58 1
 -13 -25 2 578 104 1
 -13 25 2 496 73 1
 -12 -25 2 2097 151 1
 -12 -25 2 2220 167 1
 -12 25 2 2189 134 1
 -11 -25 2 88 52 1
 -11 -25 2 197 73 1
 -11 25 2 216 59 1
 -10 -25 2 2720 161 1
 -10 -25 2 2397 173 1
 -10 25 2 2695 152 1
 9 -25 -2 3661 193 1
 -9 -25 2 3860 216 1
 -9 -25 2 3809 199 1
 -9 25 2 3977 189 1
 -8 -25 2 305 64 1
 8 -25 -2 474 73 1
 -8 -25 2 470 82 1
 -8 25 2 266 52 1
 -7 -25 2 310 59 1
 7 -25 -2 305 66 1
 -7 -25 2 355 71 1
 -7 25 2 431 60 1
 -6 -25 2 526 81 1
 -6 -25 2 607 82 1
 -6 25 2 421 78 1
 6 25 -2 465 69 1
 -6 25 2 490 66 1
 -5 -25 2 595 81 1
 -5 25 2 733 98 1
 5 25 -2 658 80 1
 -5 25 2 675 71 1
 4 -25 -2 910 78 1
 -4 -25 2 865 90 1
 -4 25 2 1067 114 1
 4 25 -2 1002 96 1
 -4 25 2 990 73 1
 3 -25 -2 5058 219 1
 -3 -25 2 4804 228 1
 3 25 -2 4799 235 1
 -3 25 2 5091 251 1
 2 -25 -2 7263 306 1
 -2 -25 2 7291 309 1
 2 25 -2 7575 327 1
 -2 25 2 7581 339 1
 -1 -25 2 1791 108 1
 1 -25 -2 1770 113 1
 -1 25 2 1762 130 1
 1 25 -2 1807 125 1
 0 -25 -2 902 86 1
 0 -25 2 904 70 1
 0 25 2 781 92 1
 0 25 -2 1006 104 1
 -1 -25 -2 5118 249 1
 1 -25 2 5189 224 1
 1 25 2 5572 262 1
 -1 25 -2 5719 269 1
 -2 -25 -2 449 68 1
 2 -25 2 526 78 1
 2 -25 2 537 49 1
 2 25 2 467 69 1
 -2 25 -2 488 80 1
 -3 -25 -2 268 56 1
 3 -25 2 237 58 1
 3 25 2 260 56 1
 4 -25 2 337 69 1
 -4 -25 -2 244 55 1
 4 25 2 372 63 1
 -5 -25 -2 0 46 1
 -5 -25 -2 57 37 1
 5 -25 2 0 40 1
 5 25 2 5 38 1
 -6 -25 -2 876 80 1
 -6 -25 -2 890 101 1
 6 -25 2 676 85 1
 6 25 2 781 83 1
 7 -25 2 1057 103 1
 -7 -25 -2 891 84 1
 -7 -25 -2 865 100 1
 7 25 2 911 87 1
 -8 -25 -2 487 85 1
 8 -25 2 408 74 1
 -8 -25 -2 405 61 1
 8 25 2 386 62 1
 -9 -25 -2 648 98 1
 -9 -25 -2 495 70 1
 9 -25 2 775 92 1
 9 25 2 590 74 1
 -10 -25 -2 315 62 1
 -10 -25 -2 441 89 1
 10 -25 2 293 67 1
 -11 -25 -2 226 75 1
 -11 -25 -2 211 58 1
 11 -25 2 216 65 1
 -12 -25 -2 3629 219 1
 -12 -25 -2 3473 196 1
 -13 -25 -2 620 112 1
 -13 -26 2 190 82 1
 -13 26 2 136 61 1
 -12 -26 2 455 88 1
 -12 -26 2 402 80 1
 -12 26 2 476 71 1
 -11 -26 2 11 43 1
 -11 -26 2 57 57 1
 -11 26 2 62 48 1
 -10 -26 2 2101 142 1
 -10 -26 2 1994 150 1
 -10 26 2 2118 132 1
 9 -26 -2 581 80 1
 -9 -26 2 423 78 1
 -9 -26 2 533 79 1
 -8 -26 2 703 85 1
 8 -26 -2 726 89 1
 -8 -26 2 659 91 1
 -8 26 2 719 80 1
 7 -26 -2 2786 159 1
 -7 -26 2 2868 167 1
 -7 -26 2 2504 147 1
 -7 26 2 2280 137 1
 -6 -26 2 1554 118 1
 -6 -26 2 1394 119 1
 6 26 -2 1574 110 1
 -6 26 2 1526 126 1
 -6 26 2 1584 103 1
 -5 -26 2 512 76 1
 5 26 -2 446 67 1
 -5 26 2 410 80 1
 -5 26 2 467 60 1
 4 -26 -2 1090 85 1
 -4 -26 2 1035 93 1
 -4 26 2 943 113 1
 4 26 -2 844 94 1
 3 -26 -2 4209 189 1
 -3 -26 2 3998 197 1
 -3 26 2 4071 222 1
 3 26 -2 3924 204 1
 -2 -26 2 167 47 1
 2 -26 -2 218 45 1
 2 26 -2 375 64 1
 -2 26 2 186 62 1
 -1 -26 2 8022 330 1
 1 -26 -2 8398 338 1
 -1 26 2 8322 364 1
 1 26 -2 7982 355 1
 0 -26 -2 147 44 1
 0 -26 2 177 39 1
 0 26 2 149 56 1
 0 26 -2 249 59 1
 1 -26 2 8293 321 1
 -1 -26 -2 8295 345 1
 -1 26 -2 7730 360 1
 1 26 2 7790 355 1
 2 -26 2 888 61 1
 -2 -26 -2 781 83 1
 -2 26 -2 868 99 1
 2 26 2 782 87 1
 3 -26 2 113 53 1
 -3 -26 -2 127 52 1
 3 26 2 78 49 1
 -4 -26 -2 154 56 1
 4 -26 2 160 59 1
 4 26 2 208 60 1
 -5 -26 -2 894 82 1
 5 -26 2 935 101 1
 -5 -26 -2 990 102 1
 5 26 2 804 89 1
 -6 -26 -2 471 63 1
 6 -26 2 510 78 1
 -6 -26 -2 642 89 1
 6 26 2 520 73 1
 -7 -26 -2 367 62 1
 7 -26 2 461 74 1
 -7 -26 -2 380 79 1
 7 26 2 524 71 1
 -8 -26 -2 394 62 1
 8 -26 2 363 69 1
 -8 -26 -2 351 72 1
 8 26 2 440 69 1
 -9 -26 -2 65 59 1
 9 -26 2 213 60 1
 -9 -26 -2 129 48 1
 9 26 2 179 55 1
 -10 -26 -2 1759 121 1
 -10 -26 -2 1855 151 1
 10 -26 2 2038 133 1
 -11 -26 -2 113 56 1
 11 -26 2 182 64 1
 -11 -26 -2 157 77 1
 -12 -26 -2 2107 146 1
 -12 -26 -2 2170 173 1
 -12 -27 2 240 70 1
 -12 -27 2 151 78 1
 -12 27 2 157 53 1
 -11 -27 2 32 69 1
 -11 -27 2 0 42 1
 -11 27 2 51 46 1
 -10 -27 2 2135 146 1
 -10 -27 2 2246 161 1
 -10 27 2 2161 136 1
 9 -27 -2 1519 122 1
 -9 -27 2 1578 125 1
 -9 -27 2 1447 142 1
 -9 27 2 1593 113 1
 8 -27 -2 272 65 1
 -8 -27 2 263 69 1
 -8 -27 2 249 64 1
 -7 -27 2 1403 104 1
 -7 -27 2 1110 109 1
 7 -27 -2 1128 109 1
 -7 27 2 1311 93 1
 -6 -27 2 225 62 1
 -6 -27 2 306 66 1
 -6 27 2 159 45 1
 6 27 -2 207 53 1
 -6 27 2 253 67 1
 -5 -27 2 1416 109 1
 5 27 -2 1282 101 1
 -5 27 2 1561 95 1
 -5 27 2 1210 120 1
 4 -27 -2 4017 194 1
 -4 -27 2 4022 206 1
 4 27 -2 4616 215 1
 -4 27 2 3806 221 1
 3 -27 -2 824 74 1
 -3 -27 2 706 79 1
 -3 27 2 690 94 1
 3 27 -2 952 99 1
 2 -27 -2 4127 196 1
 -2 -27 2 4104 199 1
 2 27 -2 4238 215 1
 -2 27 2 4284 229 1
 1 -27 -2 8218 333 1
 -1 -27 2 7762 323 1
 1 27 -2 8118 351 1
 -1 27 2 8355 358 1
 0 -27 2 185 41 1
 0 -27 -2 133 43 1
 0 27 -2 103 50 1
 0 27 2 93 48 1
 -1 -27 -2 374 65 1
 1 -27 2 289 43 1
 -1 27 -2 206 60 1
 1 27 2 312 63 1
 -2 -27 -2 13754 542 1
 2 -27 2 13736 509 1
 2 27 2 13284 547 1
 -2 27 -2 13634 558 1
 3 -27 2 99 46 1
 -3 -27 -2 137 53 1
 -4 -27 -2 714 92 1
 4 -27 2 726 92 1
 4 27 2 772 88 1
 5 -27 2 283 65 1
 -5 -27 -2 357 72 1
 -5 -27 -2 395 61 1
 5 27 2 390 62 1
 -6 -27 -2 216 51 1
 6 -27 2 279 62 1
 -6 -27 -2 249 70 1
 6 27 2 150 49 1
 -7 -27 -2 613 73 1
 7 -27 2 428 77 1
 -7 -27 -2 584 92 1
 7 27 2 562 75 1
 -8 -27 -2 0 44 1
 -8 -27 -2 19 39 1
 8 -27 2 0 43 1
 8 27 2 35 42 1
 -9 -27 -2 443 70 1
 9 -27 2 471 76 1
 -9 -27 -2 453 81 1
 9 27 2 609 77 1
 -10 -27 -2 88 49 1
 10 -27 2 65 54 1
 -10 -27 -2 98 64 1
 -11 -27 -2 183 59 1
 -11 -27 -2 74 70 1
 -12 -27 -2 122 60 1
 -12 -27 -2 60 72 1
 -12 -28 2 1564 133 1
 -12 -28 2 1791 147 1
 -12 28 2 1537 126 1
 -11 -28 2 104 61 1
 -11 -28 2 33 50 1
 -11 28 2 36 47 1
 -10 -28 2 150 63 1
 -10 -28 2 197 61 1
 -10 28 2 134 53 1
 9 -28 -2 6364 294 1
 -9 -28 2 6665 311 1
 -9 -28 2 6468 296 1
 8 -28 -2 493 78 1
 -8 -28 2 585 88 1
 -8 -28 2 569 82 1
 -7 -28 2 493 82 1
 -7 -28 2 318 64 1
 7 -28 -2 372 73 1
 -6 -28 2 1265 118 1
 -6 -28 2 1180 116 1
 -6 28 2 1404 99 1
 -6 28 2 1099 118 1
 6 28 -2 1373 106 1
 -5 -28 2 479 76 1
 5 -28 -2 602 68 1
 -5 28 2 480 58 1
 -5 28 2 515 83 1
 5 28 -2 632 78 1
 -4 -28 2 495 71 1
 4 -28 -2 433 61 1
 -4 28 2 374 78 1
 4 28 -2 448 73 1
 3 -28 -2 353 54 1
 -3 -28 2 311 60 1
 -3 28 2 405 81 1
 3 28 -2 333 66 1
 2 -28 -2 1440 105 1
 -2 -28 2 1427 107 1
 -2 28 2 1548 133 1
 2 28 -2 1543 121 1
 -1 -28 2 1684 105 1
 1 -28 -2 1627 110 1
 1 28 -2 1667 125 1
 -1 28 2 1539 129 1
 0 -28 -2 49 38 1
 0 28 2 94 56 1
 0 28 -2 232 59 1
 -1 -28 -2 20417 776 1
 1 -28 2 20248 751 1
 -1 28 -2 20772 796 1
 1 28 2 20218 791 1
 -2 -28 -2 21474 829 1
 -2 28 -2 21869 849 1
 2 28 2 21884 839 1
 3 -28 2 1385 127 1
 -3 -28 -2 1297 109 1
 3 28 2 1322 108 1
 4 -28 2 643 92 1
 -4 -28 -2 740 91 1
 4 28 2 605 80 1
 -5 -28 -2 795 80 1
 -5 -28 -2 759 96 1
 5 -28 2 826 93 1
 5 28 2 791 86 1
 -6 -28 -2 163 65 1
 6 -28 2 171 55 1
 -6 -28 -2 171 47 1
 6 28 2 204 56 1
 7 -28 2 0 42 1
 -7 -28 -2 95 62 1
 -7 -28 -2 15 35 1
 7 28 2 0 40 1
 -8 -28 -2 512 88 1
 -8 -28 -2 459 70 1
 8 -28 2 659 89 1
 8 28 2 520 76 1
 9 -28 2 0 46 1
 -9 -28 -2 21 56 1
 -9 -28 -2 0 36 1
 10 -28 2 53 51 1
 -10 -28 -2 0 42 1
 -10 -28 -2 105 68 1
 -11 -28 -2 560 79 1
 -11 -28 -2 475 89 1
 -12 -28 -2 308 89 1
 -12 -28 -2 315 71 1
 -12 -29 2 1086 117 1
 -12 -29 2 1347 147 1
 -12 29 2 1299 116 1
 -11 -29 2 615 105 1
 -11 -29 2 667 92 1
 -11 29 2 640 77 1
 -10 -29 2 692 104 1
 -10 -29 2 705 91 1
 -9 -29 2 1637 147 1
 -9 -29 2 1494 124 1
 9 -29 -2 1492 123 1
 -8 -29 2 2015 144 1
 8 -29 -2 2187 149 1
 -8 -29 2 2079 153 1
 -7 -29 2 711 95 1
 7 -29 -2 933 99 1
 -7 -29 2 647 82 1
 -6 -29 2 2659 161 1
 -6 -29 2 2516 156 1
 -6 29 2 2578 169 1
 -6 29 2 2495 137 1
 6 29 -2 2526 147 1
 5 -29 -2 264 54 1
 -5 -29 2 333 70 1
 5 29 -2 483 76 1
 -5 29 2 258 74 1
 -4 -29 2 1727 118 1
 4 -29 -2 1616 106 1
 4 29 -2 1573 117 1
 -4 29 2 1844 140 1
 -3 -29 2 1411 106 1
 3 -29 -2 1450 101 1
 3 29 -2 1236 112 1
 -3 29 2 1422 139 1
 2 -29 -2 5395 242 1
 -2 -29 2 5456 246 1
 2 29 -2 5347 262 1
 -2 29 2 5861 279 1
 1 -29 -2 407 60 1
 -1 -29 2 330 54 1
 1 29 -2 331 66 1
 -1 29 2 373 77 1
 0 -29 2 138 41 1
 0 -29 -2 60 40 1
 0 29 2 60 53 1
 0 29 -2 138 52 1
 -1 -29 -2 8929 379 1
 1 -29 2 9061 355 1
 -1 29 -2 8949 397 1
 1 29 2 9736 399 1
 -2 -29 -2 4088 188 1
 2 29 2 3645 193 1
 -2 29 -2 3016 190 1
 -3 -29 -2 892 94 1
 3 -29 2 781 95 1
 3 29 2 1142 110 1
 -4 -29 -2 2185 137 1
 4 -29 2 2160 148 1
 4 29 2 2264 134 1
 -5 -29 -2 1466 106 1
 5 -29 2 1742 130 1
 -5 -29 -2 1526 126 1
 5 29 2 1587 118 1
 -6 -29 -2 2482 164 1
 6 -29 2 2548 161 1
 -6 -29 -2 2334 138 1
 6 29 2 2396 148 1
 -7 -29 -2 588 90 1
 7 -29 2 617 82 1
 -7 -29 -2 706 75 1
 7 29 2 697 81 1
 8 -29 2 1072 113 1
 -8 -29 -2 1097 124 1
 -8 -29 -2 1059 100 1
 8 29 2 1012 102 1
 -9 -29 -2 81 48 1
 -9 -29 -2 107 64 1
 9 -29 2 58 53 1
 9 29 2 118 54 1
 -10 -29 -2 1617 144 1
 10 -29 2 1767 136 1
 -10 -29 -2 1571 122 1
 -11 -29 -2 346 87 1
 11 -29 2 352 78 1
 -11 -29 -2 507 77 1
 -12 -29 -2 1603 143 1
 -12 -29 -2 1669 127 1
 -12 -30 2 184 66 1
 -12 -30 2 147 74 1
 -11 -30 2 603 99 1
 -11 -30 2 534 89 1
 -10 -30 2 388 89 1
 -10 -30 2 468 82 1
 -9 -30 2 137 57 1
 9 -30 -2 169 59 1
 -9 -30 2 169 68 1
 -8 -30 2 611 87 1
 -8 -30 2 773 93 1
 8 -30 -2 718 96 1
 7 -30 -2 868 103 1
 -7 -30 2 738 98 1
 -7 -30 2 789 96 1
 -6 -30 2 1366 125 1
 -6 -30 2 981 104 1
 6 30 -2 1294 104 1
 -6 30 2 1102 122 1
 5 -30 -2 1033 85 1
 -5 -30 2 835 95 1
 -5 30 2 884 112 1
 5 30 -2 986 100 1
 -4 -30 2 2246 140 1
 4 -30 -2 2262 127 1
 4 30 -2 2144 143 1
 -4 30 2 2301 163 1
 -3 -30 2 4417 215 1
 3 -30 -2 4374 206 1
 3 30 -2 4364 226 1
 -3 30 2 4135 239 1
 -2 -30 2 1272 100 1
 2 -30 -2 1237 99 1
 -2 30 2 965 114 1
 2 30 -2 1250 113 1
 -1 -30 2 937 82 1
 1 -30 -2 1088 97 1
 -1 30 2 794 104 1
 1 30 -2 864 102 1
 0 -30 2 1975 106 1
 0 -30 -2 1540 110 1
 0 30 2 1675 128 1
 0 30 -2 1943 132 1
 1 -30 2 20770 776 1
 -1 -30 -2 21558 803 1
 1 30 2 21261 820 1
 -1 30 -2 20948 822 1
 -2 -30 -2 2349 146 1
 2 30 2 2366 157 1
 -2 30 -2 2555 161 1
 -3 -30 -2 472 76 1
 3 -30 2 412 78 1
 3 30 2 454 74 1
 -4 -30 -2 5605 267 1
 4 -30 2 5684 275 1
 4 30 2 5595 263 1
 -5 -30 -2 936 88 1
 -5 -30 -2 1027 109 1
 5 -30 2 1144 116 1
 5 30 2 1140 108 1
 -6 -30 -2 1871 140 1
 6 -30 2 1556 129 1
 -6 -30 -2 1495 112 1
 6 30 2 2010 129 1
 -7 -30 -2 2400 140 1
 -7 -30 -2 2341 164 1
 7 -30 2 2602 163 1
 7 30 2 2654 153 1
 8 -30 2 3304 194 1
 -8 -30 -2 3246 200 1
 -8 -30 -2 3305 175 1
 8 30 2 3473 194 1
 -9 -30 -2 0 55 1
 9 -30 2 66 58 1
 -9 -30 -2 94 51 1
 9 30 2 131 52 1
 -10 -30 -2 1333 113 1
 10 -30 2 1371 136 1
 -10 -30 -2 1264 131 1
 -11 -30 -2 434 98 1
 11 -30 2 520 86 1
 -11 -30 -2 482 77 1
 -12 -30 -2 105 56 1
 -12 -30 -2 8 74 1
 -12 -31 2 75 62 1
 -12 -31 2 273 85 1
 -11 -31 2 14 54 1
 -11 -31 2 71 70 1
 -10 -31 2 380 89 1
 -10 -31 2 432 82 1
 -9 -31 2 331 66 1
 -9 -31 2 342 82 1
 9 -31 -2 417 75 1
 8 -31 -2 446 79 1
 -8 -31 2 486 74 1
 -8 -31 2 860 107 1
 -7 -31 2 1466 133 1
 7 -31 -2 1063 118 1
 -7 -31 2 1262 121 1
 -6 -31 2 594 82 1
 -6 -31 2 755 92 1
 -6 31 2 521 92 1
 6 31 -2 569 82 1
 5 -31 -2 390 59 1
 -5 -31 2 380 71 1
 -5 31 2 280 77 1
 5 31 -2 314 65 1
 4 -31 -2 1050 87 1
 -4 -31 2 826 88 1
 -4 31 2 777 104 1
 4 31 -2 801 92 1
 -3 -31 2 1139 97 1
 3 -31 -2 990 87 1
 3 31 -2 1165 114 1
 -3 31 2 1140 123 1
 2 -31 -2 172 45 1
 -2 -31 2 99 44 1
 2 31 -2 70 50 1
 -2 31 2 121 56 1
 -1 -31 2 5970 265 1
 1 -31 -2 5850 271 1
 1 31 -2 6156 291 1
 -1 31 2 6235 299 1
 0 -31 2 1531 99 1
 0 -31 -2 1574 108 1
 0 31 2 1506 126 1
 0 31 -2 1605 126 1
 -1 31 -2 383 72 1
 1 31 2 576 84 1
 -2 -31 -2 4811 232 1
 -2 31 -2 5355 254 1
 2 31 2 4930 241 1
 3 -31 2 888 104 1
 -3 -31 -2 474 74 1
 3 31 2 729 88 1
 4 -31 2 1283 126 1
 -4 -31 -2 1600 121 1
 4 31 2 1388 112 1
 -5 -31 -2 328 67 1
 5 -31 2 415 76 1
 -5 -31 -2 298 58 1
 5 31 2 264 64 1
 6 -31 2 1193 120 1
 -6 -31 -2 1274 122 1
 -6 -31 -2 1059 92 1
 6 31 2 1069 106 1
 -7 -31 -2 57 58 1
 7 -31 2 0 50 1
 -7 -31 -2 32 40 1
 7 31 2 22 46 1
 -8 -31 -2 951 94 1
 8 -31 2 799 99 1
 -8 -31 -2 834 113 1
 8 31 2 751 92 1
 -9 -31 -2 2657 181 1
 9 -31 2 2934 176 1
 -9 -31 -2 2747 156 1
 10 -31 2 113 62 1
 -10 -31 -2 122 54 1
 -10 -31 -2 131 72 1
 -11 -31 -2 56 52 1
 -11 -31 -2 48 69 1
 -12 -31 -2 58 76 1
 -12 -31 -2 88 59 1
 -12 -32 2 53 75 1
 -11 -32 2 296 89 1
 -11 -32 2 299 77 1
 -10 -32 2 151 61 1
 -10 -32 2 204 78 1
 -9 -32 2 1686 132 1
 -9 -32 2 1700 144 1
 9 -32 -2 1591 130 1
 -8 -32 2 155 66 1
 8 -32 -2 106 58 1
 -8 -32 2 121 58 1
 7 -32 -2 171 59 1
 -7 -32 2 208 66 1
 -7 -32 2 277 66 1
 -6 -32 2 1126 117 1
 -6 -32 2 1088 112 1
 6 32 -2 1217 112 1
 -6 32 2 1342 138 1
 -5 -32 2 1444 116 1
 5 -32 -2 1225 97 1
 -5 32 2 1417 139 1
 5 32 -2 1302 109 1
 4 -32 -2 92 40 1
 -4 -32 2 55 46 1
 -4 32 2 61 58 1
 4 32 -2 3 43 1
 3 -32 -2 1768 115 1
 -3 -32 2 1949 128 1
 -3 32 2 1809 143 1
 3 32 -2 2030 138 1
 -2 -32 2 109 45 1
 2 -32 -2 57 40 1
 2 32 -2 151 58 1
 -2 32 2 124 63 1
 -1 -32 2 246 52 1
 1 -32 -2 255 53 1
 1 32 -2 277 68 1
 -1 32 2 184 61 1
 0 -32 2 1449 100 1
 0 -32 -2 1265 106 1
 0 32 2 1388 136 1
 0 32 -2 1360 121 1
 -1 -32 -2 4039 197 1
 -1 32 -2 3531 203 1
 1 32 2 3713 207 1
 -2 -32 -2 3851 195 1
 2 32 2 3665 203 1
 -2 32 -2 3390 202 1
 -3 -32 -2 1662 122 1
 3 -32 2 1350 121 1
 3 32 2 1498 120 1
 -4 -32 -2 719 90 1
 4 -32 2 830 101 1
 4 32 2 625 83 1
 5 -32 2 444 81 1
 -5 -32 -2 424 79 1
 -5 -32 -2 464 67 1
 5 32 2 283 68 1
 -6 -32 -2 314 62 1
 6 -32 2 367 75 1
 -6 -32 -2 210 64 1
 6 32 2 402 70 1
 -7 -32 -2 586 95 1
 -7 -32 -2 603 79 1
 7 -32 2 797 103 1
 7 32 2 748 89 1
 -8 -32 -2 1545 143 1
 -8 -32 -2 1695 122 1
 8 -32 2 1619 132 1
 8 32 2 1811 124 1
 9 -32 2 47 56 1
 -9 -32 -2 52 62 1
 -9 -32 -2 0 43 1
 -10 -32 -2 912 122 1
 10 -32 2 1070 116 1
 -10 -32 -2 879 99 1
 -11 -32 -2 23 51 1
 -11 -32 -2 33 63 1
 11 -32 2 31 58 1
 -11 -33 2 41 67 1
 -11 -33 2 4 47 1
 -10 -33 2 132 71 1
 -10 -33 2 70 53 1
 -9 -33 2 173 64 1
 9 -33 -2 317 72 1
 -9 -33 2 303 76 1
 -8 -33 2 21 52 1
 -8 -33 2 0 49 1
 8 -33 -2 9 50 1
 -7 -33 2 275 69 1
 -7 -33 2 167 58 1
 7 -33 -2 235 66 1
 -6 -33 2 555 78 1
 -6 -33 2 651 92 1
 6 33 -2 683 85 1
 -6 33 2 717 117 1
 -5 -33 2 3664 207 1
 -5 33 2 3859 229 1
 5 33 -2 4042 211 1
 4 -33 -2 168 48 1
 -4 -33 2 124 54 1
 -4 33 2 142 60 1
 4 33 -2 157 60 1
 3 -33 -2 5605 255 1
 -3 -33 2 5865 264 1
 -3 33 2 5720 291 1
 3 33 -2 5832 276 1
 2 -33 -2 4428 213 1
 -2 -33 2 4400 213 1
 -2 33 2 4679 248 1
 2 33 -2 4220 228 1
 1 -33 -2 538 69 1
 -1 -33 2 489 64 1
 -1 33 2 446 79 1
 1 33 -2 462 78 1
 0 -33 -2 1195 98 1
 0 -33 2 1282 95 1
 0 33 -2 1451 118 1
 0 33 2 1259 124 1
 -1 -33 -2 2939 175 1
 -1 33 -2 3475 200 1
 1 33 2 3317 198 1
 -2 -33 -2 1659 120 1
 -2 33 -2 1839 135 1
 2 33 2 1551 124 1
 3 -33 2 2600 162 1
 -3 -33 -2 2643 155 1
 3 33 2 2477 158 1
 -4 -33 -2 1194 115 1
 4 -33 2 1187 119 1
 4 33 2 918 105 1
 5 -33 2 1505 128 1
 -5 -33 -2 1518 126 1
 -5 -33 -2 1349 103 1
 5 33 2 1538 121 1
 6 -33 2 1784 140 1
 -6 -33 -2 1743 142 1
 -6 -33 -2 1850 121 1
 6 33 2 1901 131 1
 -7 -33 -2 640 84 1
 7 -33 2 624 91 1
 -7 -33 -2 744 104 1
 7 33 2 856 96 1
 8 -33 2 2222 160 1
 -8 -33 -2 2306 145 1
 -8 -33 -2 2362 168 1
 8 33 2 2527 159 1
 -9 -33 -2 173 55 1
 9 -33 2 204 68 1
 -9 -33 -2 183 70 1
 10 -33 2 173 69 1
 -10 -33 -2 104 53 1
 -10 -33 -2 155 76 1
 -11 -33 -2 54 70 1
 -11 -33 -2 210 65 1
 -11 -34 2 1229 136 1
 -11 -34 2 1112 128 1
 -10 -34 2 270 80 1
 -10 -34 2 311 75 1
 -9 -34 2 346 79 1
 9 -34 -2 230 69 1
 -9 -34 2 344 74 1
 -8 -34 2 0 55 1
 8 -34 -2 0 47 1
 -8 -34 2 0 47 1
 -7 -34 2 649 95 1
 7 -34 -2 644 95 1
 -7 -34 2 778 100 1
 -6 -34 2 1474 131 1
 -6 34 2 1320 140 1
 6 34 -2 1064 109 1
 -5 -34 2 2149 142 1
 5 34 -2 1979 140 1
 -5 34 2 1891 153 1
 -4 -34 2 202 58 1
 4 -34 -2 219 53 1
 -4 34 2 266 78 1
 4 34 -2 253 65 1
 3 -34 -2 3066 168 1
 -3 -34 2 3077 173 1
 3 34 -2 3308 188 1
 -3 34 2 3113 201 1
 2 -34 -2 2582 151 1
 -2 -34 2 2467 151 1
 -2 34 2 2902 187 1
 2 34 -2 2605 169 1
 -1 -34 2 50 45 1
 1 -34 -2 43 41 1
 -1 34 2 11 51 1
 1 34 -2 78 56 1
 0 -34 -2 682 80 1
 0 34 -2 771 98 1
 0 34 2 559 85 1
 -1 -34 -2 102 51 1
 -1 34 -2 101 58 1
 1 34 2 96 60 1
 -2 -34 -2 867 97 1
 2 34 2 908 105 1
 -2 34 -2 756 98 1
 3 -34 2 262 64 1
 -3 -34 -2 299 61 1
 3 34 2 366 72 1
 -4 -34 -2 177 58 1
 4 -34 2 211 65 1
 4 34 2 396 73 1
 -5 -34 -2 4517 230 1
 -5 -34 -2 4424 215 1
 5 -34 2 4460 236 1
 5 34 2 4561 229 1
 -6 -34 -2 1286 125 1
 6 -34 2 1073 112 1
 -6 -34 -2 1001 99 1
 6 34 2 998 111 1
 -7 -34 -2 234 60 1
 -7 -34 -2 465 88 1
 7 -34 2 219 71 1
 7 34 2 370 70 1
 -8 -34 -2 11151 485 1
 -8 -34 -2 10654 447 1
 8 -34 2 11978 488 1
 8 34 2 11495 466 1
 9 -34 2 2520 167 1
 -9 -34 -2 2442 158 1
 -9 -34 -2 2386 168 1
 -10 -34 -2 17 69 1
 10 -34 2 0 54 1
 -10 -34 -2 69 51 1
 11 -34 2 340 80 1
 -11 -34 -2 537 103 1
 -11 -35 2 74 65 1
 -11 -35 2 156 79 1
 -10 -35 2 109 72 1
 -10 -35 2 2 57 1
 -9 -35 2 307 82 1
 -9 -35 2 223 68 1
 9 -35 -2 332 77 1
 8 -35 -2 2 53 1
 -8 -35 2 122 58 1
 -8 -35 2 115 65 1
 -7 -35 2 1093 118 1
 7 -35 -2 995 115 1
 -7 -35 2 946 102 1
 -6 -35 2 1538 138 1
 -6 35 2 1676 156 1
 6 35 -2 1518 121 1
 -5 -35 2 341 72 1
 -5 35 2 371 81 1
 5 35 -2 336 72 1
 -4 -35 2 2277 142 1
 4 35 -2 2150 147 1
 -4 35 2 2015 156 1
 -3 -35 2 933 96 1
 3 -35 -2 857 93 1
 -3 35 2 924 112 1
 3 35 -2 1241 123 1
 2 -35 -2 2901 164 1
 -2 -35 2 2741 161 1
 -2 35 2 2943 193 1
 2 35 -2 2831 178 1
 -1 -35 2 1815 121 1
 1 -35 -2 1823 127 1
 1 35 -2 1892 144 1
 -1 35 2 2051 150 1
 0 -35 -2 1524 114 1
 0 35 -2 1644 132 1
 0 35 2 1730 137 1
 -1 -35 -2 42 45 1
 -1 35 -2 47 53 1
 1 35 2 30 47 1
 -2 -35 -2 371 71 1
 -2 35 -2 356 74 1
 2 35 2 386 77 1
 3 -35 2 2479 171 1
 -3 -35 -2 2881 164 1
 3 35 2 2786 168 1
 4 -35 2 44 57 1
 -4 -35 -2 110 56 1
 4 35 2 112 58 1
 -5 -35 -2 1807 126 1
 -5 -35 -2 1925 146 1
 5 -35 2 1678 142 1
 5 35 2 2214 145 1
 6 -35 2 1512 133 1
 -6 -35 -2 1446 112 1
 -6 -35 -2 1801 142 1
 6 35 2 1730 131 1
 -7 -35 -2 1070 119 1
 7 -35 2 587 94 1
 -7 -35 -2 757 89 1
 7 35 2 804 103 1
 -8 -35 -2 989 121 1
 8 -35 2 937 112 1
 -8 -35 -2 949 100 1
 8 35 2 979 103 1
 -9 -35 -2 1959 137 1
 -9 -35 -2 2204 160 1
 9 -35 2 1803 148 1
 10 -35 2 61 63 1
 -10 -35 -2 48 71 1
 -10 -35 -2 47 53 1
 -11 -35 -2 26 73 1
 11 -35 2 25 64 1
 -11 -36 2 1249 140 1
 -11 -36 2 1197 122 1
 -10 -36 2 1023 126 1
 -10 -36 2 730 98 1
 -9 -36 2 481 86 1
 9 -36 -2 321 77 1
 -9 -36 2 375 88 1
 -8 -36 2 4 61 1
 -8 -36 2 76 55 1
 8 -36 -2 91 60 1
 -7 -36 2 99 59 1
 -7 -36 2 172 70 1
 7 -36 -2 232 68 1
 -6 -36 2 1549 129 1
 6 36 -2 1465 129 1
 -6 36 2 1703 154 1
 -5 -36 2 2335 159 1
 5 36 -2 2587 165 1
 -5 36 2 2477 180 1
 -4 -36 2 645 83 1
 4 36 -2 598 88 1
 -4 36 2 554 98 1
 -3 -36 2 4637 225 1
 3 -36 -2 4401 217 1
 -3 36 2 4334 248 1
 3 36 -2 4756 239 1
 2 -36 -2 972 92 1
 -2 -36 2 788 85 1
 2 36 -2 765 93 1
 -2 36 2 999 115 1
 1 -36 -2 596 79 1
 -1 -36 2 617 78 1
 1 36 -2 706 97 1
 -1 36 2 676 94 1
 0 -36 -2 187 54 1
 0 36 -2 96 50 1
 0 36 2 186 66 1
 -1 -36 -2 1 43 1
 -1 36 -2 33 47 1
 1 36 2 43 55 1
 -2 -36 -2 71 53 1
 -2 36 -2 64 52 1
 2 36 2 2 53 1
 -3 -36 -2 1218 114 1
 3 -36 2 932 110 1
 3 36 2 1143 120 1
 4 -36 2 555 94 1
 -4 -36 -2 389 77 1
 4 36 2 373 79 1
 -5 -36 -2 456 69 1
 5 -36 2 361 80 1
 -5 -36 -2 366 80 1
 5 36 2 475 76 1
 -6 -36 -2 3579 197 1
 -6 -36 -2 3883 214 1
 6 -36 2 4150 226 1
 6 36 2 4005 222 1
 7 -36 2 2148 154 1
 -7 -36 -2 2079 156 1
 -7 -36 -2 1947 136 1
 7 36 2 1916 145 1
 -8 -36 -2 183 75 1
 8 -36 2 150 68 1
 -8 -36 -2 105 54 1
 8 36 2 157 65 1
 -9 -36 -2 203 63 1
 -9 -36 -2 186 75 1
 9 -36 2 238 73 1
 -10 -36 -2 285 86 1
 -10 -37 2 0 65 1
 -10 -37 2 24 59 1
 -9 -37 2 122 72 1
 -9 -37 2 63 61 1
 9 -37 -2 25 59 1
 8 -37 -2 868 108 1
 -8 -37 2 1163 124 1
 -8 -37 2 1054 115 1
 7 -37 -2 530 86 1
 -7 -37 2 405 83 1
 -7 -37 2 326 68 1
 -6 -37 2 59 57 1
 6 37 -2 0 49 1
 -6 37 2 34 60 1
 -5 -37 2 3445 194 1
 5 37 -2 3398 195 1
 -5 37 2 3377 213 1
 -4 -37 2 286 65 1
 4 37 -2 205 63 1
 -4 37 2 103 63 1
 -3 -37 2 7724 351 1
 3 -37 -2 7456 344 1
 -3 37 2 8574 387 1
 3 37 -2 9043 373 1
 2 -37 -2 2619 155 1
 -2 -37 2 2750 160 1
 2 37 -2 2711 174 1
 -2 37 2 2873 185 1
 1 -37 -2 186 59 1
 1 37 -2 166 66 1
 -1 37 2 236 72 1
 0 -37 -2 2060 137 1
 0 37 -2 2247 155 1
 0 37 2 2025 161 1
 -1 -37 -2 382 69 1
 -1 37 -2 349 77 1
 1 37 2 381 80 1
 -2 -37 -2 296 65 1
 -2 37 -2 225 70 1
 2 37 2 293 69 1
 -3 -37 -2 636 86 1
 3 -37 2 465 87 1
 3 37 2 487 81 1
 -4 -37 -2 168 62 1
 4 -37 2 106 62 1
 4 37 2 223 65 1
 -5 -37 -2 3873 198 1
 -5 -37 -2 4210 220 1
 5 -37 2 3834 218 1
 5 37 2 4052 216 1
 -6 -37 -2 9032 390 1
 -6 -37 -2 7721 354 1
 6 -37 2 8181 382 1
 6 37 2 8948 386 1
 -7 -37 -2 425 76 1
 -7 -37 -2 457 88 1
 7 -37 2 456 80 1
 7 37 2 594 88 1
 -8 -37 -2 1067 125 1
 8 -37 2 1113 120 1
 -8 -37 -2 1088 108 1
 -9 -37 -2 803 107 1
 9 -37 2 896 117 1
 -10 -37 -2 1 69 1
 10 -37 2 0 59 1
 -10 -38 2 95 74 1
 -10 -38 2 41 62 1
 -9 -38 2 2302 160 1
 -9 -38 2 2368 172 1
 9 -38 -2 2485 162 1
 -8 -38 2 2261 156 1
 8 -38 -2 1797 150 1
 -8 -38 2 1923 155 1
 -7 -38 2 1375 137 1
 7 -38 -2 1306 134 1
 -7 -38 2 1405 131 1
 -6 -38 2 84 61 1
 6 38 -2 32 53 1
 -6 38 2 40 61 1
 -5 -38 2 1450 127 1
 -5 38 2 968 122 1
 5 38 -2 1108 112 1
 -4 -38 2 949 102 1
 -4 38 2 1098 132 1
 4 38 -2 998 113 1
 -3 -38 2 8026 346 1
 3 38 -2 8136 360 1
 -3 38 2 7991 372 1
 2 -38 -2 2594 162 1
 -2 -38 2 2531 156 1
 -2 38 2 2757 183 1
 2 38 -2 2616 174 1
 1 -38 -2 669 84 1
 1 38 -2 965 113 1
 -1 38 2 627 95 1
 0 -38 -2 3131 173 1
 0 38 -2 3247 196 1
 0 38 2 3016 194 1
 -1 -38 -2 5857 275 1
 1 38 2 5565 287 1
 -1 38 -2 5748 295 1
 -2 -38 -2 2733 172 1
 2 38 2 2903 183 1
 -2 38 -2 2546 180 1
 -3 -38 -2 1310 112 1
 3 -38 2 981 112 1
 3 38 2 1364 142 1
 -4 -38 -2 1484 129 1
 4 -38 2 1556 137 1
 4 38 2 1663 136 1
 5 -38 2 5209 272 1
 -5 -38 -2 5170 253 1
 -5 -38 -2 5253 268 1
 5 38 2 5983 275 1
 -6 -38 -2 2063 137 1
 -6 -38 -2 2308 162 1
 6 -38 2 2000 157 1
 -7 -38 -2 55 65 1
 7 -38 2 113 63 1
 -7 -38 -2 62 49 1
 7 38 2 34 54 1
 -8 -38 -2 4996 264 1
 8 -38 2 5377 271 1
 9 -38 2 39 59 1
 -9 -38 -2 205 77 1
 -10 -38 -2 200 83 1
 10 -38 2 315 81 1
 -10 -39 2 253 81 1
 -10 -39 2 245 83 1
 9 -39 -2 880 110 1
 -9 -39 2 762 103 1
 -9 -39 2 1131 126 1
 -8 -39 2 613 93 1
 8 -39 -2 542 92 1
 -8 -39 2 595 100 1
 -7 -39 2 639 96 1
 7 -39 -2 492 89 1
 -7 -39 2 453 81 1
 -6 -39 2 147 65 1
 6 39 -2 15 53 1
 -6 39 2 10 61 1
 -5 -39 2 824 102 1
 -5 39 2 946 123 1
 5 39 -2 792 100 1
 -4 -39 2 1221 113 1
 -4 39 2 1186 129 1
 4 39 -2 1293 124 1
 -3 -39 2 1992 137 1
 -3 39 2 2234 167 1
 3 39 -2 1995 146 1
 2 -39 -2 2516 153 1
 2 39 -2 2691 172 1
 -2 39 2 2639 189 1
 1 -39 -2 473 76 1
 -1 39 2 441 87 1
 1 39 -2 510 84 1
 0 -39 -2 1136 108 1
 0 39 -2 1322 129 1
 0 39 2 1081 119 1
 -1 -39 -2 496 79 1
 -1 39 -2 548 89 1
 1 39 2 636 94 1
 -2 -39 -2 953 104 1
 2 39 2 907 108 1
 -2 39 -2 1078 124 1
 -3 -39 -2 758 96 1
 3 -39 2 414 80 1
 3 39 2 822 101 1
 -4 -39 -2 2694 172 1
 4 -39 2 2709 180 1
 4 39 2 2812 176 1
 -5 -39 -2 1932 149 1
 5 -39 2 2096 153 1
 -5 -39 -2 1604 125 1
 5 39 2 1957 149 1
 -6 -39 -2 460 87 1
 -6 -39 -2 479 74 1
 6 -39 2 543 96 1
 6 39 2 499 91 1
 -7 -39 -2 394 88 1
 7 -39 2 244 75 1
 -8 -39 -2 161 71 1
 8 -39 2 187 74 1
 8 39 2 185 69 1
 -9 -39 -2 70 72 1
 9 -39 2 5 62 1
 -10 -39 -2 316 91 1
 10 -39 2 247 80 1
 -10 -40 2 52 73 1
 -10 -40 2 65 55 1
 -9 -40 2 488 94 1
 -9 -40 2 358 84 1
 9 -40 -2 214 72 1
 -8 -40 2 131 66 1
 -8 -40 2 139 73 1
 8 -40 -2 5 55 1
 -7 -40 2 211 74 1
 -7 -40 2 264 68 1
 7 -40 -2 233 71 1
 -6 -40 2 338 79 1
 6 40 -2 247 75 1
 -6 40 2 320 88 1
 -5 -40 2 2643 167 1
 5 40 -2 2587 166 1
 -5 40 2 2409 177 1
 -4 -40 2 618 87 1
 -4 40 2 576 105 1
 4 40 -2 559 89 1
 -3 -40 2 1970 136 1
 -3 40 2 1934 174 1
 3 40 -2 1807 140 1
 -2 40 2 1630 161 1
 2 40 -2 1383 134 1
 1 -40 -2 60 52 1
 -1 40 2 59 59 1
 1 40 -2 84 61 1
 0 -40 -2 67 48 1
 0 40 2 182 62 1
 0 40 -2 282 72 1
 -1 -40 -2 1336 111 1
 1 40 2 1139 128 1
 -1 40 -2 1306 128 1
 -2 -40 -2 519 82 1
 2 40 2 573 94 1
 -2 40 -2 550 89 1
 3 -40 2 163 65 1
 -3 -40 -2 179 63 1
 3 40 2 226 73 1
 4 -40 2 1073 126 1
 -4 -40 -2 979 115 1
 4 40 2 988 119 1
 5 -40 2 407 86 1
 -5 -40 -2 473 89 1
 5 40 2 512 86 1
 -6 -40 -2 2429 174 1
 6 -40 2 2377 172 1
 6 40 2 2418 175 1
 7 -40 2 264 75 1
 -7 -40 -2 236 71 1
 7 40 2 221 70 1
 8 -40 2 167 64 1
 -8 -40 -2 180 77 1
 -9 -40 -2 547 102 1
 9 -40 2 337 84 1
 9 -41 -2 143 72 1
 -9 -41 2 134 71 1
 -9 -41 2 75 74 1
 -8 -41 2 351 81 1
 8 -41 -2 334 79 1
 -8 -41 2 402 91 1
 7 -41 -2 1832 148 1
 -7 -41 2 1997 152 1
 -7 -41 2 1889 153 1
 -6 -41 2 156 65 1
 -6 41 2 170 74 1
 6 41 -2 65 60 1
 -5 -41 2 1062 114 1
 -5 41 2 1032 129 1
 5 41 -2 1045 111 1
 -4 -41 2 137 62 1
 4 41 -2 303 73 1
 -4 41 2 277 75 1
 -3 -41 2 777 93 1
 -3 41 2 701 103 1
 3 41 -2 845 101 1
 -2 41 2 578 105 1
 2 41 -2 689 100 1
 1 -41 -2 510 80 1
 1 41 -2 542 91 1
 -1 41 2 500 90 1
 0 -41 -2 1867 135 1
 0 41 2 1787 155 1
 0 41 -2 2038 151 1
 -1 -41 -2 334 71 1
 -1 41 -2 213 72 1
 1 41 2 311 81 1
 -2 -41 -2 311 71 1
 2 41 2 349 83 1
 -2 41 -2 260 75 1
 -3 -41 -2 414 80 1
 3 -41 2 319 81 1
 3 41 2 370 78 1
 -4 -41 -2 554 91 1
 4 -41 2 606 98 1
 4 41 2 566 88 1
 5 -41 2 869 113 1
 -5 -41 -2 590 98 1
 5 41 2 889 112 1
 -6 -41 -2 2748 181 1
 6 -41 2 2501 176 1
 7 -41 2 391 84 1
 -7 -41 -2 353 88 1
 8 -41 2 439 87 1
 -8 -41 -2 477 97 1
 8 41 2 320 77 1
 9 -41 2 91 67 1
 -9 -41 -2 60 72 1
 -9 -42 2 1855 158 1
 -9 -42 2 1775 158 1
 9 -42 -2 1943 155 1
 -8 -42 2 2366 164 1
 8 -42 -2 1722 144 1
 -8 -42 2 1862 148 1
 7 -42 -2 2639 178 1
 -7 -42 2 2769 186 1
 -7 -42 2 2501 174 1
 -6 -42 2 835 104 1
 -6 42 2 714 109 1
 -5 -42 2 475 84 1
 -5 42 2 448 96 1
 5 42 -2 527 89 1
 -4 -42 2 760 96 1
 4 42 -2 781 98 1
 -4 42 2 971 132 1
 -3 42 2 156 71 1
 3 42 -2 128 56 1
 2 42 -2 104 56 1
 -2 42 2 157 70 1
 1 -42 -2 336 67 1
 -1 42 2 307 77 1
 1 42 -2 364 79 1
 0 -42 -2 205 59 1
 0 42 -2 215 70 1
 0 42 2 154 71 1
 -1 -42 -2 456 77 1
 -1 42 -2 380 77 1
 1 42 2 453 84 1
 -2 -42 -2 852 103 1
 2 42 2 751 104 1
 -2 42 -2 871 119 1
 -3 -42 -2 68 60 1
 3 -42 2 66 66 1
 -4 -42 -2 3462 203 1
 4 -42 2 3292 203 1
 5 -42 2 1155 127 1
 -5 -42 -2 1212 128 1
 5 42 2 1010 115 1
 -6 -42 -2 0 65 1
 6 -42 2 171 70 1
 7 -42 2 92 66 1
 -7 -42 -2 153 77 1
 8 -42 2 595 101 1
 -8 -42 -2 621 99 1
 9 -42 2 197 81 1
 -9 -42 -2 98 70 1
 9 -43 -2 107 69 1
 -9 -43 2 79 77 1
 -9 -43 2 130 72 1
 8 -43 -2 299 80 1
 -8 -43 2 376 89 1
 -8 -43 2 439 91 1
 7 -43 -2 1611 137 1
 -7 -43 2 1289 132 1
 -7 -43 2 1424 137 1
 -6 -43 2 1939 149 1
 -6 43 2 1982 165 1
 -5 -43 2 558 89 1
 5 43 -2 384 78 1
 -5 43 2 344 84 1
 -4 -43 2 315 73 1
 -4 43 2 327 88 1
 4 43 -2 292 72 1
 -3 43 2 147 75 1
 3 43 -2 154 60 1
 2 43 -2 0 52 1
 -2 43 2 32 60 1
 -1 43 2 556 93 1
 1 43 -2 627 97 1
 0 -43 -2 224 64 1
 0 43 -2 142 67 1
 -1 -43 -2 952 106 1
 -1 43 -2 982 120 1
 1 43 2 917 112 1
 -2 -43 -2 478 79 1
 2 -43 2 419 80 1
 -2 43 -2 214 75 1
 2 43 2 326 83 1
 3 -43 2 360 85 1
 -3 -43 -2 381 77 1
 3 43 2 505 96 1
 4 -43 2 2452 176 1
 -4 -43 -2 2676 175 1
 4 43 2 3057 192 1
 -5 -43 -2 128 77 1
 5 -43 2 98 66 1
 5 43 2 133 70 1
 -6 -43 -2 1307 137 1
 6 -43 2 1110 126 1
 6 43 2 1301 135 1
 -7 -43 -2 609 102 1
 7 -43 2 781 113 1
 -8 -43 -2 116 74 1
 8 -43 2 91 69 1
 -8 -44 2 510 98 1
 -8 -44 2 462 89 1
 8 -44 -2 488 91 1
 -7 -44 2 240 75 1
 -7 -44 2 206 75 1
 7 -44 -2 190 74 1
 -6 -44 2 1816 142 1
 6 -44 -2 1693 140 1
 6 44 -2 1358 136 1
 -6 44 2 1709 165 1
 -5 -44 2 543 89 1
 -5 44 2 669 109 1
 5 44 -2 569 89 1
 -4 44 2 37 70 1
 4 44 -2 13 53 1
 -3 44 2 982 126 1
 3 44 -2 939 112 1
 -2 44 2 709 102 1
 2 44 -2 616 97 1
 1 44 -2 1604 133 1
 -1 44 2 1628 141 1
 0 -44 -2 1057 106 1
 0 44 -2 966 118 1
 -1 -44 -2 140 62 1
 -1 44 -2 54 63 1
 1 44 2 25 65 1
 -2 -44 -2 23 54 1
 2 -44 2 37 65 1
 -2 44 -2 57 64 1
 -3 -44 -2 2013 145 1
 3 -44 2 2123 150 1
 3 44 2 2032 159 1
 -4 -44 -2 1150 125 1
 4 -44 2 1012 121 1
 4 44 2 1182 135 1
 5 -44 2 615 100 1
 -5 -44 -2 570 99 1
 5 44 2 672 106 1
 6 -44 2 950 113 1
 -6 -44 -2 992 121 1
 -7 -44 -2 90 76 1
 7 -44 2 183 75 1
 7 44 2 123 71 1
 8 -44 2 58 66 1
 -8 -44 -2 134 78 1
 8 44 2 123 69 1
 8 -45 -2 309 80 1
 -8 -45 2 275 78 1
 -8 -45 2 291 86 1
 -7 -45 2 5369 275 1
 7 -45 -2 5394 275 1
 -7 -45 2 4915 268 1
 -6 -45 2 242 75 1
 6 -45 -2 150 70 1
 -6 45 2 262 86 1
 -5 -45 2 166 72 1
 5 45 -2 44 63 1
 -5 45 2 132 72 1
 -4 45 2 962 134 1
 4 45 -2 844 103 1
 -3 45 2 186 71 1
 3 45 -2 60 58 1
 -2 45 2 1135 131 1
 2 45 -2 1318 133 1
 1 45 -2 136 66 1
 -1 45 2 237 73 1
 0 45 -2 958 117 1
 -1 -45 -2 442 81 1
 -1 45 -2 518 92 1
 -2 -45 -2 931 105 1
 2 -45 2 796 113 1
 -2 45 -2 735 112 1
 2 45 2 874 124 1
 3 -45 2 1982 151 1
 -3 -45 -2 1997 145 1
 3 45 2 1852 150 1
 -4 -45 -2 952 117 1
 4 -45 2 820 110 1
 4 45 2 996 119 1
 -5 -45 -2 229 83 1
 5 -45 2 105 64 1
 5 45 2 193 72 1
 -6 -45 -2 352 88 1
 6 -45 2 344 84 1
 7 -45 2 12 66 1
 -7 -45 -2 35 71 1
 7 45 2 27 64 1
 -8 -45 -2 59 70 1
 8 -45 2 16 62 1
 -7 -46 2 3177 205 1
 7 -46 -2 3721 217 1
 -7 -46 2 3551 213 1
 -6 -46 2 641 102 1
 6 -46 -2 512 92 1
 -6 46 2 800 119 1
 -5 46 2 1169 140 1
 5 46 -2 983 113 1
 4 46 -2 5038 256 1
 -4 46 2 4737 272 1
 3 46 -2 862 110 1
 -3 46 2 880 125 1
 2 46 -2 167 71 1
 -2 46 2 242 85 1
 -1 46 2 68 61 1
 1 46 -2 12 58 1
 0 46 -2 10 50 1
 -1 -46 -2 200 67 1
 -1 46 -2 82 66 1
 -2 -46 -2 895 103 1
 2 -46 2 630 98 1
 2 46 2 808 106 1
 -2 46 -2 848 111 1
 -3 -46 -2 603 96 1
 3 -46 2 758 112 1
 3 46 2 639 102 1
 4 -46 2 1497 145 1
 -4 -46 -2 1526 140 1
 4 46 2 1475 143 1
 -5 -46 -2 0 67 1
 5 -46 2 64 60 1
 6 -46 2 645 103 1
 -6 -46 -2 622 108 1
 6 46 2 683 105 1
 7 -46 2 664 106 1
 -7 -47 2 2710 187 1
 7 -47 -2 2352 173 1
 -7 -47 2 2251 168 1
 6 -47 -2 1664 152 1
 -6 -47 2 1815 159 1
 -6 47 2 1520 161 1
 -5 47 2 2505 189 1
 4 47 -2 2924 184 1
 -4 47 2 2929 207 1
 -3 47 2 193 86 1
 3 47 -2 61 57 1
 2 47 -2 54 61 1
 -2 47 2 68 73 1
 -1 47 2 134 66 1
 1 47 -2 0 48 1
 0 47 2 0 64 1
 0 47 -2 2 57 1
 -1 47 -2 378 89 1
 1 47 2 392 94 1
 -2 -47 -2 138 63 1
 2 -47 2 120 73 1
 2 47 2 299 85 1
 -2 47 -2 111 69 1
 -3 -47 -2 23 62 1
 3 -47 2 34 56 1
 3 47 2 0 59 1
 -4 -47 -2 1351 141 1
 4 -47 2 1392 148 1
 4 47 2 1500 160 1
 -5 -47 -2 519 98 1
 5 -47 2 526 96 1
 6 -47 2 427 90 1
 -7 -47 -2 1229 138 1
 7 -47 2 1476 149 1
 7 47 2 1225 136 1
 6 -48 -2 709 110 1
 -6 48 2 664 116 1
 -5 48 2 2203 184 1
 5 48 -2 2100 160 1
 4 48 -2 427 85 1
 -4 48 2 304 91 1
 3 48 -2 11 58 1
 -3 48 2 95 77 1
 2 48 -2 1702 146 1
 -2 48 2 1720 177 1
 -1 48 2 1467 145 1
 1 48 -2 1804 147 1
 0 48 -2 2145 165 1
 0 48 2 1950 170 1
 -1 48 -2 627 101 1
 1 48 2 349 85 1
 2 -48 2 45 57 1
 -2 48 -2 108 66 1
 3 -48 2 1304 136 1
 4 -48 2 1439 145 1
 4 48 2 1173 138 1
 5 -48 2 407 93 1
 -5 -48 -2 414 91 1
 -6 -48 -2 893 127 1
 6 -48 2 909 120 1
 6 48 2 595 108 1
 6 -49 -2 78 67 1
 5 49 -2 419 87 1
 -5 49 2 568 109 1
 4 49 -2 1357 136 1
 -4 49 2 1077 129 1
 -3 49 2 61 65 1
 3 49 -2 35 64 1
 1 49 -2 15 59 1
 -1 49 2 23 56 1
 0 49 2 568 105 1
 0 49 -2 611 99 1
 1 49 2 516 95 1
 2 -49 2 332 87 1
 2 49 2 444 98 1
 3 -49 2 531 98 1
 3 49 2 682 112 1
 4 -49 2 859 112 1
 4 49 2 959 123 1
 -5 -49 -2 212 85 1
 5 -49 2 226 81 1
 5 49 2 202 78 1
 -6 -49 -2 76 75 1
 6 -49 2 292 86 1
 6 49 2 165 76 1
 -5 50 2 388 92 1
 -4 50 2 3653 230 1
 4 50 -2 3196 202 1
 -3 50 2 17 71 1
 -2 50 2 444 97 1
 2 50 -2 503 95 1
 -1 50 2 32 67 1
 1 50 -2 0 53 1
 0 50 2 0 70 1
 0 50 -2 122 67 1
 1 50 2 313 91 1
 -1 50 -2 413 85 1
 2 -50 2 241 77 1
 2 50 2 320 89 1
 3 -50 2 1083 121 1
 3 50 2 1027 117 1
 4 -50 2 646 109 1
 -4 -50 -2 722 110 1
 5 -50 2 132 73 1
 4 51 -2 1965 154 1
 -3 51 2 67 76 1
 2 51 -2 276 80 1
 -2 51 2 298 81 1
 1 51 -2 0 53 1
 -1 51 2 16 64 1
 0 51 -2 411 85 1
 0 51 2 308 86 1
 -1 51 -2 161 80 1
 2 -51 2 829 115 1
 2 51 2 531 102 1
 3 51 2 444 99 1
 4 -51 2 218 79 1
 4 52 -2 198 76 1
 -4 52 2 201 81 1
 3 52 -2 638 100 1
 -2 52 2 127 68 1
 1 52 -2 880 121 1
 -1 52 2 670 123 1
 0 52 2 20 59 1
 1 -52 2 1445 150 1
 -1 52 -2 1580 140 1
 2 -52 2 2046 161 1
 3 -52 2 1063 126 1
 3 52 2 1087 144 1
 2 53 -2 106 70 1
 -1 53 2 221 89 1
 0 53 2 94 65 1
 0 53 -2 88 69 1
 1 -53 2 36 67 1
 -1 53 -2 26 64 1
 2 -53 2 265 82 1
 0 54 -2 285 77 1
 0 54 2 351 85 1
 -14 0 3 0 58 1
 -14 0 3 68 48 1
 -13 0 3 455 74 1
 -13 0 3 369 78 1
 -12 0 3 25 51 1
 -12 0 3 1 39 1
 -11 0 3 6 34 1
 -11 0 3 101 56 1
 -10 0 3 300 54 1
 -10 0 3 383 72 1
 -9 0 3 3193 160 1
 -9 0 3 3054 176 1
 -8 0 3 12156 490 1
 -8 0 3 12240 462 1
 -7 0 3 24545 948 1
 -7 0 3 25518 902 1
 -6 0 3 7523 316 1
 -6 0 3 7722 295 1
 -5 0 3 55 30 1
 -5 0 3 49 38 1
 -4 0 3 579 55 1
 -4 0 3 758 82 1
 -3 0 3 64 35 1
 -3 0 3 46 25 1
 -2 0 3 42 24 1
 -2 0 3 73 36 1
 -1 0 3 422 27 1
 -1 0 3 358 36 1
 0 0 3 143 33 1
 0 0 3 166 39 1
 -2 0 -3 253 38 1
 -3 0 -3 53947 1873 1
 3 0 3 52441 1953 1
 -3 0 -3 53425 1953 1
 -4 0 -3 25730 858 1
 4 0 3 24876 895 1
 -5 0 -3 179 37 1
 5 0 3 132 38 1
 -6 0 -3 1483 91 1
 6 0 3 1427 92 1
 -7 0 -3 740 75 1
 -7 0 -3 808 70 1
 7 0 3 773 74 1
 8 0 3 1533 92 1
 -8 0 -3 1511 91 1
 -8 0 -3 1467 101 1
 9 0 3 1910 109 1
 -9 0 -3 1735 122 1
 -9 0 -3 1836 109 1
 10 0 3 115 40 1
 -10 0 -3 151 47 1
 -10 0 -3 173 57 1
 -11 0 -3 808 93 1
 -11 0 -3 727 75 1
 -12 0 -3 1887 133 1
 -12 0 -3 1767 114 1
 -13 0 -3 113 50 1
 -14 0 -3 1196 116 1
 -14 -1 3 22 54 1
 -14 -1 3 72 54 1
 -14 1 3 133 65 1
 -13 -1 3 162 66 1
 -13 -1 3 134 56 1
 -13 1 3 117 46 1
 -12 -1 3 82 58 1
 -12 -1 3 124 51 1
 -12 1 3 128 52 1
 -12 1 3 183 61 1
 -11 -1 3 629 70 1
 -11 -1 3 719 92 1
 -11 1 3 503 64 1
 -11 1 3 655 87 1
 -10 -1 3 1086 90 1
 -10 -1 3 1161 112 1
 -10 1 3 1121 90 1
 -10 1 3 938 101 1
 -9 -1 3 271 57 1
 -9 -1 3 299 70 1
 -9 1 3 340 60 1
 -9 1 3 363 66 1
 -8 -1 3 11763 456 1
 -8 -1 3 12188 489 1
 -8 1 3 12054 458 1
 -8 1 3 12000 486 1
 -7 -1 3 4098 206 1
 -7 -1 3 4023 186 1
 -7 1 3 4054 203 1
 -7 1 3 4560 191 1
 -6 -1 3 2704 144 1
 -6 -1 3 2610 129 1
 -6 1 3 2550 127 1
 -6 1 3 2721 146 1
 -5 -1 3 1195 86 1
 -5 -1 3 1263 100 1
 -5 1 3 1657 108 1
 -5 1 3 1790 97 1
 -4 -1 3 322 53 1
 -4 -1 3 405 46 1
 -4 1 3 242 37 1
 -4 1 3 192 46 1
 -3 -1 3 220 40 1
 -3 -1 3 269 35 1
 -3 1 3 142 28 1
 -3 1 3 54 34 1
 -2 -1 3 1601 94 1
 -2 -1 3 1839 80 1
 -2 1 3 1647 93 1
 -2 1 3 1732 77 1
 -1 -1 3 2015 92 1
 -1 -1 3 2133 79 1
 -1 1 3 2226 96 1
 -1 1 3 2229 76 1
 -1 1 3 2258 81 1
 0 -1 3 22051 796 1
 0 -1 3 22105 791 1
 0 1 3 22403 792 1
 0 1 3 21618 798 1
 -1 -1 -3 5049 218 1
 1 -1 3 5462 219 1
 1 1 3 5281 216 1
 -1 1 -3 5437 216 1
 2 -1 3 12212 480 1
 -2 -1 -3 12663 451 1
 -2 1 -3 12253 454 1
 -2 1 -3 12487 477 1
 2 1 3 12744 480 1
 -3 -1 -3 84030 2888 1
 3 -1 3 84740 3011 1
 3 1 3 84162 3009 1
 -3 1 -3 84166 3007 1
 -3 1 -3 84024 2889 1
 -4 -1 -3 14537 526 1
 4 -1 3 14473 552 1
 -4 1 -3 14643 527 1
 4 1 3 13904 550 1
 -4 1 -3 15091 551 1
 5 -1 3 4517 200 1
 -5 -1 -3 4474 190 1
 -5 -1 -3 4582 203 1
 5 1 3 4716 201 1
 -5 1 -3 4688 192 1
 -5 1 -3 4457 199 1
 -6 -1 -3 2338 118 1
 6 -1 3 2517 124 1
 -6 -1 -3 2411 130 1
 6 1 3 2314 121 1
 -6 1 -3 2486 121 1
 7 -1 3 273 47 1
 -7 -1 -3 372 51 1
 -7 -1 -3 415 57 1
 -7 1 -3 292 49 1
 7 1 3 321 49 1
 8 -1 3 1437 95 1
 -8 -1 -3 1502 103 1
 -8 -1 -3 1491 95 1
 8 1 3 1479 95 1
 -8 1 -3 1428 99 1
 -8 1 -3 1460 95 1
 -9 -1 -3 484 70 1
 -9 -1 -3 384 58 1
 9 -1 3 423 57 1
 -9 1 -3 393 58 1
 9 1 3 358 54 1
 -9 1 -3 353 61 1
 -10 -1 -3 172 55 1
 -10 -1 -3 207 49 1
 10 -1 3 155 43 1
 -10 1 -3 159 49 1
 -10 1 -3 177 55 1
 10 1 3 164 42 1
 -11 -1 -3 652 75 1
 -11 -1 -3 662 91 1
 -11 1 -3 743 92 1
 -11 1 -3 732 78 1
 -12 -1 -3 1133 100 1
 -12 -1 -3 1041 112 1
 -12 1 -3 863 91 1
 -12 1 -3 1156 114 1
 -13 -1 -3 1138 104 1
 -13 1 -3 879 92 1
 -14 -1 -3 707 83 1
 -14 1 -3 786 89 1
 -14 -2 3 33 52 1
 -14 2 3 35 54 1
 -14 2 3 71 62 1
 -13 -2 3 450 81 1
 -13 -2 3 646 82 1
 -13 2 3 789 106 1
 -13 2 3 591 73 1
 -12 -2 3 220 67 1
 -12 -2 3 206 52 1
 -12 2 3 171 54 1
 -12 2 3 244 64 1
 -11 -2 3 915 105 1
 -11 -2 3 912 90 1
 -11 2 3 851 97 1
 -11 2 3 848 85 1
 -10 -2 3 399 63 1
 -10 -2 3 335 69 1
 -10 2 3 469 63 1
 -10 2 3 408 69 1
 -9 -2 3 1069 87 1
 -9 -2 3 1341 109 1
 -9 2 3 1226 93 1
 -9 2 3 1296 107 1
 -8 -2 3 4233 195 1
 -8 -2 3 4173 216 1
 -8 2 3 4411 196 1
 -8 2 3 4371 216 1
 -7 -2 3 255 45 1
 -7 -2 3 227 53 1
 -7 2 3 269 45 1
 -6 -2 3 627 65 1
 -6 -2 3 559 72 1
 -6 2 3 700 61 1
 -6 2 3 803 84 1
 -5 -2 3 7828 331 1
 -5 -2 3 8319 309 1
 -5 2 3 7682 329 1
 -5 2 3 8030 306 1
 -4 -2 3 1145 71 1
 -4 -2 3 1038 83 1
 -4 2 3 1124 81 1
 -4 2 3 1051 67 1
 -3 -2 3 1895 89 1
 -3 -2 3 1843 103 1
 -3 2 3 1603 83 1
 -3 2 3 1736 102 1
 -2 -2 3 7122 274 1
 -2 -2 3 7127 296 1
 -2 2 3 7175 297 1
 -2 2 3 7232 269 1
 -1 -2 3 11007 412 1
 -1 -2 3 10804 426 1
 -1 2 3 11304 430 1
 -1 2 3 11520 415 1
 0 -2 3 921 52 1
 0 -2 3 875 50 1
 0 2 3 928 50 1
 0 2 3 904 57 1
 -1 -2 -3 10119 373 1
 1 -2 3 10070 369 1
 -1 2 -3 9224 363 1
 1 2 3 9134 366 1
 -2 -2 -3 48487 1654 1
 -2 -2 -3 46756 1736 1
 2 -2 3 48495 1733 1
 -2 2 -3 46819 1728 1
 -2 2 -3 47169 1660 1
 2 2 3 47683 1732 1
 -3 -2 -3 25092 882 1
 3 -2 3 24634 881 1
 -3 -2 -3 25105 838 1
 -3 2 -3 24844 842 1
 3 2 3 23048 878 1
 -3 2 -3 23912 873 1
 -4 -2 -3 450 42 1
 -4 -2 -3 604 55 1
 4 -2 3 346 46 1
 4 2 3 418 45 1
 -4 2 -3 560 46 1
 -4 2 -3 771 57 1
 5 -2 3 5023 220 1
 -5 -2 -3 5061 224 1
 -5 -2 -3 5269 209 1
 -5 2 -3 5539 220 1
 -5 2 -3 5392 212 1
 5 2 3 5252 220 1
 6 -2 3 2592 134 1
 -6 -2 -3 2668 130 1
 -6 -2 -3 2606 141 1
 6 2 3 2923 137 1
 -6 2 -3 2902 133 1
 -6 2 -3 2521 134 1
 7 -2 3 50 33 1
 -7 -2 -3 167 46 1
 -7 2 -3 5 28 1
 7 2 3 128 36 1
 -7 2 -3 63 35 1
 -8 -2 -3 938 79 1
 -8 -2 -3 808 85 1
 8 -2 3 850 74 1
 8 2 3 921 73 1
 -8 2 -3 965 79 1
 9 -2 3 696 69 1
 -9 -2 -3 532 63 1
 -9 -2 -3 508 68 1
 9 2 3 560 61 1
 -9 2 -3 592 68 1
 10 -2 3 61 40 1
 -10 -2 -3 129 41 1
 -10 -2 -3 44 49 1
 -10 2 -3 75 46 1
 -10 2 -3 51 40 1
 10 2 3 125 40 1
 -11 -2 -3 325 70 1
 -11 -2 -3 176 50 1
 -11 2 -3 254 51 1
 -11 2 -3 424 73 1
 -12 -2 -3 669 90 1
 -12 -2 -3 711 84 1
 -12 2 -3 644 80 1
 -13 -2 -3 697 86 1
 -13 2 -3 827 91 1
 -14 -2 -3 236 68 1
 -14 2 -3 152 58 1
 -14 -3 3 139 64 1
 -14 -3 3 96 48 1
 -14 3 3 116 69 1
 -14 3 3 108 48 1
 -13 -3 3 89 45 1
 -13 -3 3 21 57 1
 -13 3 3 52 46 1
 -13 3 3 169 68 1
 -12 -3 3 64 42 1
 -12 -3 3 150 60 1
 -12 3 3 195 63 1
 -12 3 3 250 58 1
 -11 -3 3 0 38 1
 -11 -3 3 45 52 1
 -11 3 3 1 40 1
 -11 3 3 93 52 1
 -10 -3 3 341 60 1
 -10 -3 3 215 61 1
 -10 3 3 182 60 1
 -10 3 3 175 50 1
 -9 -3 3 74 43 1
 -9 -3 3 105 52 1
 -9 3 3 103 49 1
 -9 3 3 25 32 1
 -8 -3 3 26756 922 1
 -8 -3 3 25583 967 1
 -8 3 3 26106 966 1
 -8 3 3 25978 917 1
 -7 -3 3 3541 167 1
 -7 -3 3 3682 187 1
 -7 3 3 3277 162 1
 -7 3 3 3477 181 1
 6 -3 -3 4041 149 1
 -6 -3 3 3843 192 1
 -6 -3 3 4107 174 1
 -6 3 3 3862 190 1
 -6 3 3 3718 170 1
 -5 -3 3 7515 296 1
 -5 -3 3 7314 318 1
 -5 3 3 6656 288 1
 -5 3 3 7540 319 1
 -4 -3 3 4068 194 1
 -4 -3 3 4332 179 1
 -4 3 3 4718 199 1
 -4 3 3 4718 177 1
 -3 -3 3 5239 219 1
 -3 -3 3 4863 200 1
 -3 3 3 4828 195 1
 -3 3 3 4987 219 1
 -2 -3 3 8974 323 1
 -2 -3 3 8693 342 1
 -2 3 3 8683 346 1
 -2 3 3 8425 325 1
 -2 3 3 8732 315 1
 -1 -3 3 2800 108 1
 -1 -3 3 2900 97 1
 -1 3 3 2239 94 1
 -1 3 3 2688 111 1
 0 -3 3 5825 210 1
 0 -3 3 6242 212 1
 0 3 3 5840 217 1
 0 3 3 5844 210 1
 1 -3 3 1373 74 1
 -1 -3 -3 1442 80 1
 1 3 3 1543 75 1
 -1 3 -3 1554 71 1
 -2 -3 -3 3653 158 1
 -2 -3 -3 3483 135 1
 2 -3 3 3885 157 1
 2 3 3 3686 153 1
 -2 3 -3 3836 146 1
 3 -3 3 23535 885 1
 -3 -3 -3 24121 840 1
 -3 -3 -3 23591 887 1
 -3 3 -3 23539 874 1
 -3 3 -3 23629 846 1
 3 3 3 23868 884 1
 -4 -3 -3 3939 160 1
 -4 -3 -3 4179 179 1
 4 -3 3 3903 174 1
 4 3 3 4143 174 1
 -4 3 -3 4252 166 1
 -4 3 -3 4173 168 1
 -5 -3 -3 5958 223 1
 5 -3 3 5929 236 1
 -5 -3 -3 6062 245 1
 5 3 3 5159 229 1
 -5 3 -3 5629 224 1
 -5 3 -3 5580 230 1
 -6 -3 -3 977 83 1
 6 -3 3 934 72 1
 -6 -3 -3 907 67 1
 6 3 3 981 71 1
 -6 3 -3 1018 71 1
 -6 3 -3 942 72 1
 -7 -3 -3 279 45 1
 -7 -3 -3 319 56 1
 7 -3 3 188 41 1
 -7 3 -3 159 40 1
 7 3 3 159 38 1
 -7 3 -3 189 44 1
 -8 -3 -3 1074 90 1
 -8 -3 -3 1019 78 1
 8 -3 3 1056 78 1
 8 3 3 1067 77 1
 -8 3 -3 1227 80 1
 -8 3 -3 1183 86 1
 -9 -3 -3 40 45 1
 -9 -3 -3 8 32 1
 9 -3 3 95 39 1
 9 3 3 81 37 1
 -9 3 -3 28 29 1
 -9 3 -3 50 35 1
 10 -3 3 73 39 1
 -10 -3 -3 120 41 1
 -10 -3 -3 85 50 1
 -10 3 -3 16 36 1
 -10 3 -3 3 26 1
 10 3 3 83 38 1
 11 -3 3 606 75 1
 -11 -3 -3 635 85 1
 -11 -3 -3 563 71 1
 -11 3 -3 558 69 1
 -12 -3 -3 523 88 1
 -12 -3 -3 894 92 1
 -12 3 -3 889 92 1
 -13 -3 -3 737 90 1
 -13 3 -3 850 90 1
 -14 -3 -3 457 67 1
 -14 3 -3 528 78 1
 -14 -4 3 63 55 1
 -14 4 3 76 54 1
 -14 4 3 90 69 1
 -13 -4 3 458 84 1
 -13 -4 3 394 72 1
 -13 4 3 325 75 1
 -13 4 3 356 72 1
 -12 -4 3 189 51 1
 -12 -4 3 211 70 1
 -12 4 3 160 63 1
 -12 4 3 291 61 1
 -11 -4 3 40 43 1
 -11 -4 3 63 53 1
 -11 4 3 82 54 1
 -11 4 3 84 46 1
 -10 -4 3 2733 148 1
 -10 -4 3 3106 174 1
 -10 4 3 2833 167 1
 -10 4 3 2777 148 1
 -9 -4 3 666 89 1
 -9 -4 3 643 74 1
 -9 4 3 560 78 1
 -9 4 3 721 77 1
 -8 -4 3 7591 350 1
 -8 -4 3 7745 329 1
 -8 4 3 8857 331 1
 -8 4 3 9109 359 1
 -7 -4 3 9542 390 1
 7 -4 -3 9912 346 1
 -7 -4 3 9370 364 1
 -7 4 3 9333 361 1
 -7 4 3 9556 389 1
 -6 -4 3 2105 131 1
 -6 -4 3 2036 114 1
 6 -4 -3 1867 88 1
 -6 4 3 2079 111 1
 -6 4 3 2041 125 1
 5 -4 -3 1612 70 1
 -5 -4 3 1477 101 1
 -5 -4 3 1483 89 1
 -5 4 3 1403 98 1
 -5 4 3 1363 83 1
 -4 -4 3 7642 317 1
 -4 -4 3 7760 295 1
 -4 4 3 7743 318 1
 -4 4 3 7748 290 1
 -4 4 3 7810 292 1
 -3 -4 3 10643 368 1
 -3 -4 3 10343 390 1
 -3 4 3 10204 361 1
 -3 4 3 9750 390 1
 -3 4 3 9481 371 1
 -2 -4 3 245 43 1
 -2 4 3 131 25 1
 -2 4 3 115 38 1
 -2 4 3 66 24 1
 -1 -4 3 21919 764 1
 -1 -4 3 22285 754 1
 -1 4 3 21916 769 1
 0 -4 3 1211 76 1
 0 -4 3 1218 75 1
 0 4 3 1163 83 1
 0 4 3 1198 76 1
 -1 -4 -3 2657 126 1
 1 -4 3 2490 122 1
 1 4 3 2390 119 1
 -2 -4 -3 552 33 1
 -2 -4 -3 532 54 1
 2 -4 3 499 50 1
 2 4 3 304 41 1
 -2 4 -3 332 33 1
 -3 -4 -3 15549 552 1
 3 -4 3 15328 588 1
 -3 -4 -3 15799 592 1
 -3 4 -3 15132 559 1
 3 4 3 15689 585 1
 -3 4 -3 15929 574 1
 -4 -4 -3 1091 64 1
 4 -4 3 957 70 1
 -4 -4 -3 1092 79 1
 4 4 3 1133 74 1
 -4 4 -3 1119 68 1
 -4 4 -3 1242 69 1
 -5 -4 -3 482 50 1
 -5 -4 -3 538 62 1
 5 -4 3 484 56 1
 5 4 3 845 62 1
 -5 4 -3 835 59 1
 -6 -4 -3 654 69 1
 -6 -4 -3 638 58 1
 6 -4 3 556 58 1
 6 4 3 530 54 1
 -6 4 -3 669 63 1
 -6 4 -3 642 61 1
 7 -4 3 3265 154 1
 -7 -4 -3 3502 167 1
 -7 -4 -3 3164 148 1
 7 4 3 3167 151 1
 -7 4 -3 3345 152 1
 -7 4 -3 3069 152 1
 -8 -4 -3 1664 103 1
 -8 -4 -3 1839 119 1
 8 -4 3 1744 105 1
 -8 4 -3 1740 106 1
 -8 4 -3 1709 109 1
 8 4 3 1737 103 1
 -9 -4 -3 380 55 1
 -9 -4 -3 253 58 1
 9 -4 3 384 55 1
 -9 4 -3 278 53 1
 -9 4 -3 377 61 1
 9 4 3 344 51 1
 -10 -4 -3 120 41 1
 10 -4 3 134 43 1
 -10 -4 -3 57 50 1
 -10 4 -3 67 39 1
 -10 4 -3 111 48 1
 10 4 3 141 41 1
 11 -4 3 2108 124 1
 -11 -4 -3 2031 124 1
 -11 -4 -3 1970 140 1
 -11 4 -3 1880 118 1
 -12 -4 -3 36 56 1
 -12 -4 -3 89 46 1
 -12 4 -3 168 54 1
 -13 -4 -3 209 73 1
 -13 -4 -3 175 60 1
 -13 4 -3 160 49 1
 -14 -4 -3 1848 136 1
 -14 4 -3 1889 135 1
 -14 -5 3 167 68 1
 -14 -5 3 205 55 1
 -14 5 3 119 66 1
 -14 5 3 235 64 1
 -13 -5 3 853 99 1
 -13 -5 3 995 121 1
 -13 5 3 796 106 1
 -13 5 3 1266 111 1
 -12 -5 3 569 89 1
 -12 -5 3 525 77 1
 -12 5 3 410 69 1
 -12 5 3 382 80 1
 -11 -5 3 232 72 1
 -11 -5 3 281 61 1
 -11 5 3 324 60 1
 -11 5 3 297 72 1
 -10 -5 3 1816 116 1
 -10 -5 3 2146 142 1
 -10 5 3 1995 117 1
 -10 5 3 1986 135 1
 -9 -5 3 104 54 1
 -9 -5 3 121 44 1
 -9 5 3 91 49 1
 -9 5 3 73 39 1
 -8 -5 3 90 50 1
 -8 -5 3 50 35 1
 -8 5 3 165 51 1
 -8 5 3 135 41 1
 -7 -5 3 1208 103 1
 -7 -5 3 1278 90 1
 7 -5 -3 1345 67 1
 -7 5 3 1339 104 1
 -7 5 3 1503 90 1
 -6 -5 3 208 49 1
 6 -5 -3 282 30 1
 -6 -5 3 226 44 1
 -6 5 3 252 51 1
 -6 5 3 188 38 1
 -5 -5 3 1953 115 1
 5 -5 -3 2094 88 1
 -5 -5 3 2108 106 1
 -5 5 3 2066 101 1
 -5 5 3 2115 118 1
 -4 -5 3 5112 199 1
 -4 -5 3 4828 214 1
 -4 5 3 4943 193 1
 -4 5 3 5295 194 1
 -4 5 3 5121 214 1
 -3 -5 3 1599 101 1
 -3 -5 3 1783 96 1
 -3 5 3 1692 86 1
 -3 5 3 1724 107 1
 -3 5 3 1561 92 1
 -2 -5 3 108 33 1
 -2 5 3 2 21 1
 -2 5 3 34 29 1
 -2 5 3 35 19 1
 -1 -5 3 2815 129 1
 -1 -5 3 2814 120 1
 -1 5 3 3042 135 1
 0 -5 3 3802 146 1
 0 -5 3 3838 150 1
 0 5 3 3895 157 1
 0 5 3 3661 150 1
 1 -5 3 8562 359 1
 -1 -5 -3 8872 364 1
 1 5 3 9084 359 1
 -2 -5 -3 786 41 1
 2 -5 3 814 58 1
 -2 -5 -3 839 71 1
 2 5 3 663 56 1
 -3 -5 -3 11643 420 1
 3 -5 3 11320 449 1
 -3 -5 -3 11604 455 1
 -3 5 -3 11885 430 1
 -3 5 -3 11691 434 1
 3 5 3 11769 448 1
 4 -5 3 50 28 1
 -4 -5 -3 92 35 1
 -4 -5 -3 57 24 1
 4 5 3 99 32 1
 -4 5 -3 63 28 1
 -4 5 -3 61 26 1
 5 -5 3 450 53 1
 -5 -5 -3 504 50 1
 -5 -5 -3 608 66 1
 5 5 3 758 64 1
 -5 5 -3 783 57 1
 -5 5 -3 683 60 1
 6 -5 3 1249 87 1
 -6 -5 -3 1227 97 1
 -6 -5 -3 1162 80 1
 -6 5 -3 1298 84 1
 6 5 3 1206 84 1
 -6 5 -3 1255 84 1
 -7 -5 -3 5451 226 1
 -7 -5 -3 5684 249 1
 7 -5 3 5489 237 1
 7 5 3 5115 230 1
 -7 5 -3 5345 229 1
 -7 5 -3 5131 230 1
 -8 -5 -3 471 69 1
 8 -5 3 371 54 1
 -8 -5 -3 414 56 1
 -8 5 -3 542 64 1
 8 5 3 486 58 1
 -8 5 -3 566 66 1
 -9 -5 -3 10 42 1
 9 -5 3 27 35 1
 -9 -5 -3 67 33 1
 9 5 3 9 31 1
 -9 5 -3 64 43 1
 -9 5 -3 12 31 1
 10 -5 3 2607 137 1
 -10 -5 -3 2642 140 1
 -10 -5 -3 2427 155 1
 10 5 3 2769 139 1
 -10 5 -3 2829 151 1
 -10 5 -3 2523 141 1
 -11 -5 -3 133 48 1
 11 -5 3 131 46 1
 -11 -5 -3 93 56 1
 -11 5 -3 120 43 1
 -12 -5 -3 381 79 1
 -12 -5 -3 369 64 1
 -12 5 -3 347 63 1
 -13 -5 -3 498 94 1
 -13 -5 -3 419 73 1
 -13 5 -3 534 81 1
 -14 -5 -3 1326 115 1
 -14 5 -3 1536 122 1
 -14 -6 3 595 87 1
 -14 6 3 540 81 1
 -13 -6 3 947 109 1
 -13 -6 3 940 93 1
 -13 6 3 1267 110 1
 -13 6 3 1054 112 1
 -12 -6 3 280 67 1
 -12 -6 3 324 80 1
 -12 6 3 330 64 1
 -12 6 3 283 73 1
 -11 -6 3 1585 132 1
 -11 -6 3 1501 109 1
 -11 6 3 1552 106 1
 -11 6 3 1622 126 1
 -10 -6 3 1487 103 1
 -10 -6 3 1491 134 1
 -10 6 3 1569 105 1
 -10 6 3 1440 117 1
 -9 -6 3 156 48 1
 -9 -6 3 169 56 1
 -9 6 3 142 51 1
 -9 6 3 129 40 1
 -8 -6 3 2115 127 1
 -8 -6 3 2062 143 1
 -8 6 3 2650 145 1
 -8 6 3 2383 127 1
 7 -6 -3 317 34 1
 -7 -6 3 256 45 1
 -7 -6 3 417 66 1
 -7 6 3 355 49 1
 -7 6 3 459 65 1
 -6 -6 3 2001 128 1
 -6 -6 3 2118 114 1
 6 -6 -3 2078 95 1
 -6 6 3 2301 128 1
 -6 6 3 2491 113 1
 -5 -6 3 2355 128 1
 -5 -6 3 2427 145 1
 5 -6 -3 2518 118 1
 -5 6 3 2615 127 1
 -5 6 3 2754 147 1
 -4 -6 3 7323 326 1
 -4 -6 3 7331 306 1
 -4 6 3 7992 329 1
 -4 6 3 7684 308 1
 -4 6 3 8037 302 1
 -3 -6 3 3144 156 1
 -3 -6 3 3219 146 1
 -3 6 3 3185 147 1
 -3 6 3 3362 137 1
 -3 6 3 3422 160 1
 -2 -6 3 2287 100 1
 -2 -6 3 2363 117 1
 -2 6 3 2467 122 1
 -2 6 3 2468 98 1
 -2 6 3 2322 109 1
 -1 -6 3 2157 103 1
 -1 -6 3 2166 96 1
 -1 6 3 2080 98 1
 -1 6 3 2082 108 1
 0 -6 -3 1549 96 1
 0 -6 3 1491 81 1
 0 -6 3 1419 84 1
 0 6 3 1699 89 1
 1 -6 3 8408 351 1
 -1 -6 -3 8900 359 1
 1 6 3 8749 351 1
 -2 -6 -3 862 72 1
 -2 -6 -3 765 47 1
 2 -6 3 841 64 1
 2 6 3 1015 68 1
 3 -6 3 1234 82 1
 -3 -6 -3 1318 65 1
 -3 -6 -3 1237 85 1
 -3 6 -3 1218 63 1
 -3 6 -3 1250 75 1
 3 6 3 1157 74 1
 -4 -6 -3 1272 88 1
 4 -6 3 1128 78 1
 -4 -6 -3 1235 68 1
 4 6 3 978 74 1
 -4 6 -3 987 65 1
 -4 6 -3 933 69 1
 -5 -6 -3 3117 149 1
 -5 -6 -3 2917 127 1
 5 -6 3 2995 141 1
 -5 6 -3 2965 127 1
 -5 6 -3 2978 134 1
 5 6 3 2935 136 1
 -6 -6 -3 2 34 1
 6 -6 3 20 29 1
 -6 -6 -3 15 26 1
 -6 6 -3 32 29 1
 -6 6 -3 19 27 1
 6 6 3 83 31 1
 -7 -6 -3 3387 170 1
 7 -6 3 3275 155 1
 -7 -6 -3 3339 149 1
 7 6 3 3169 153 1
 -7 6 -3 3158 152 1
 -7 6 -3 3053 150 1
 -8 -6 -3 371 53 1
 -8 -6 -3 452 72 1
 8 -6 3 419 57 1
 -8 6 -3 199 47 1
 -8 6 -3 295 50 1
 8 6 3 319 51 1
 9 -6 3 5413 228 1
 -9 -6 -3 4989 242 1
 -9 -6 -3 5086 221 1
 -9 6 -3 4999 223 1
 -9 6 -3 5072 228 1
 9 6 3 5350 224 1
 -10 -6 -3 317 56 1
 10 -6 3 325 53 1
 -10 -6 -3 222 62 1
 -10 6 -3 161 48 1
 10 6 3 152 43 1
 -10 6 -3 220 56 1
 -11 -6 -3 14 49 1
 11 -6 3 18 39 1
 -11 -6 -3 37 41 1
 -11 6 -3 9 35 1
 -12 -6 -3 121 51 1
 -12 6 -3 87 43 1
 -13 -6 -3 828 99 1
 -13 -6 -3 734 105 1
 -13 6 -3 893 97 1
 -14 -6 -3 197 80 1
 -14 -6 -3 294 72 1
 -14 6 -3 334 64 1
 -14 -7 3 107 50 1
 -14 -7 3 107 71 1
 -14 7 3 99 47 1
 -14 7 3 145 67 1
 -13 -7 3 481 89 1
 -13 -7 3 352 71 1
 -13 7 3 515 83 1
 -13 7 3 390 70 1
 -12 -7 3 2982 190 1
 -12 -7 3 2892 167 1
 -12 7 3 3299 185 1
 -12 7 3 3117 166 1
 -11 -7 3 77 43 1
 -11 -7 3 18 55 1
 -11 7 3 65 53 1
 -11 7 3 65 45 1
 -10 -7 3 28 46 1
 -10 -7 3 26 40 1
 -10 7 3 1 32 1
 -10 7 3 35 47 1
 -9 -7 3 2156 127 1
 -9 -7 3 2216 145 1
 -9 7 3 1923 120 1
 -9 7 3 1987 135 1
 -8 -7 3 2385 154 1
 -8 -7 3 2445 136 1
 -8 7 3 2572 134 1
 -8 7 3 2664 154 1
 -7 -7 3 3209 155 1
 7 -7 -3 3244 135 1
 -7 -7 3 3198 170 1
 -7 7 3 3094 151 1
 -7 7 3 3348 170 1
 6 -7 -3 3937 160 1
 -6 -7 3 3825 174 1
 -6 -7 3 4029 193 1
 -6 7 3 3717 188 1
 -6 7 3 3769 168 1
 -5 -7 3 3638 180 1
 5 -7 -3 3881 171 1
 -5 -7 3 3848 197 1
 -5 7 3 4325 199 1
 -5 7 3 4444 179 1
 -4 -7 3 6304 278 1
 -4 -7 3 6408 260 1
 -4 7 3 6566 253 1
 -4 7 3 6398 277 1
 -4 7 3 6719 264 1
 -3 -7 3 4123 161 1
 -3 -7 3 4022 171 1
 -3 7 3 3326 164 1
 -3 7 3 3383 145 1
 -3 7 3 3198 157 1
 -2 -7 3 16597 614 1
 -2 -7 3 16719 631 1
 -2 7 3 16247 590 1
 -2 7 3 17046 636 1
 -2 7 3 16311 625 1
 -1 -7 3 43995 1483 1
 -1 -7 3 38589 1476 1
 -1 7 3 45516 1494 1
 -1 7 3 43525 1482 1
 0 -7 3 100 30 1
 0 -7 3 111 25 1
 0 -7 -3 98 35 1
 0 7 3 99 30 1
 1 -7 3 1080 72 1
 -1 -7 -3 1082 79 1
 1 7 3 1044 72 1
 -2 -7 -3 1175 74 1
 -2 -7 -3 1134 50 1
 2 -7 3 1241 73 1
 2 7 3 1311 70 1
 3 -7 3 391 54 1
 -3 -7 -3 333 54 1
 -3 -7 -3 299 34 1
 3 7 3 262 40 1
 -4 -7 -3 1254 90 1
 -4 -7 -3 1342 73 1
 4 -7 3 1278 86 1
 4 7 3 1427 84 1
 -4 7 -3 1269 77 1
 -4 7 -3 1393 70 1
 -5 -7 -3 5689 256 1
 5 -7 3 5497 245 1
 -5 -7 -3 5894 230 1
 5 7 3 5832 243 1
 -5 7 -3 5744 236 1
 -5 7 -3 5959 233 1
 6 -7 3 1264 83 1
 -6 -7 -3 1336 98 1
 -6 -7 -3 1463 81 1
 -6 7 -3 1274 78 1
 -6 7 -3 1266 83 1
 6 7 3 1404 83 1
 7 -7 3 1611 105 1
 -7 -7 -3 2053 126 1
 -7 -7 -3 1726 101 1
 -7 7 -3 1701 105 1
 -7 7 -3 1642 101 1
 7 7 3 1741 103 1
 8 -7 3 313 51 1
 -8 -7 -3 330 51 1
 -8 -7 -3 267 60 1
 8 7 3 164 42 1
 -8 7 -3 260 51 1
 -8 7 -3 232 48 1
 9 -7 3 427 59 1
 -9 -7 -3 272 63 1
 -9 -7 -3 301 52 1
 9 7 3 433 55 1
 -9 7 -3 362 61 1
 -9 7 -3 492 65 1
 10 -7 3 415 59 1
 -10 -7 -3 454 79 1
 -10 -7 -3 423 63 1
 10 7 3 485 61 1
 -10 7 -3 344 62 1
 -11 -7 -3 73 41 1
 11 -7 3 135 47 1
 -11 -7 -3 216 67 1
 -11 7 -3 89 40 1
 -12 -7 -3 191 71 1
 -12 -7 -3 190 53 1
 -12 7 -3 122 50 1
 -13 -7 -3 199 58 1
 -13 7 -3 224 53 1
 -14 -7 -3 91 68 1
 -14 -7 -3 18 50 1
 -14 7 -3 24 52 1
 -14 -8 3 76 69 1
 -14 -8 3 209 66 1
 -14 8 3 105 55 1
 -14 8 3 166 68 1
 -13 -8 3 126 69 1
 -13 -8 3 46 44 1
 -13 8 3 28 55 1
 -13 8 3 15 47 1
 -12 -8 3 4407 246 1
 -12 -8 3 4403 210 1
 -12 8 3 4454 206 1
 -12 8 3 4528 238 1
 -11 -8 3 1632 108 1
 -11 -8 3 1447 135 1
 -11 8 3 1346 117 1
 -11 8 3 1494 108 1
 -10 -8 3 1136 100 1
 -10 -8 3 1168 115 1
 -10 8 3 1088 104 1
 -10 8 3 1100 91 1
 -9 -8 3 947 99 1
 -9 -8 3 1082 85 1
 -9 8 3 1209 109 1
 -9 8 3 1014 85 1
 -8 -8 3 94 48 1
 -8 -8 3 171 49 1
 -8 8 3 218 44 1
 -8 8 3 190 55 1
 -7 -8 3 965 84 1
 -7 -8 3 666 80 1
 7 -8 -3 880 56 1
 -7 8 3 688 68 1
 -7 8 3 576 75 1
 6 -8 -3 1180 67 1
 -6 -8 3 1113 94 1
 -6 -8 3 1099 79 1
 -6 8 3 830 87 1
 -6 8 3 989 71 1
 -5 -8 3 4792 209 1
 -5 -8 3 4772 191 1
 -5 8 3 3864 179 1
 -5 8 3 4156 180 1
 -5 8 3 3932 197 1
 -4 -8 3 1146 74 1
 -4 -8 3 1236 89 1
 -4 8 3 815 62 1
 -4 8 3 777 70 1
 -4 8 3 789 74 1
 -3 -8 3 5410 246 1
 -3 -8 3 5739 226 1
 -3 8 3 5641 245 1
 -3 8 3 5737 251 1
 -3 8 3 6105 225 1
 -1 -8 3 24505 911 1
 -1 8 3 25238 915 1
 -1 8 3 26445 924 1
 0 -8 -3 1993 112 1
 0 -8 3 2185 108 1
 0 -8 3 1954 95 1
 0 8 3 2162 108 1
 1 -8 3 6670 264 1
 -1 -8 -3 6373 269 1
 1 8 3 6761 262 1
 -2 -8 -3 393 31 1
 2 -8 3 390 49 1
 -2 -8 -3 372 54 1
 2 8 3 493 51 1
 -3 -8 -3 2877 112 1
 3 -8 3 2610 130 1
 -3 -8 -3 2758 137 1
 3 8 3 2472 125 1
 4 -8 3 609 66 1
 -4 -8 -3 664 53 1
 -4 -8 -3 614 73 1
 -4 8 -3 788 51 1
 -4 8 -3 710 62 1
 4 8 3 667 61 1
 5 -8 3 3177 149 1
 -5 -8 -3 3109 133 1
 -5 -8 -3 3135 157 1
 5 8 3 2817 140 1
 -5 8 -3 3023 130 1
 -5 8 -3 3117 141 1
 6 -8 3 265 46 1
 -6 -8 -3 205 53 1
 -6 -8 -3 220 39 1
 6 8 3 320 47 1
 -6 8 -3 341 44 1
 -6 8 -3 279 47 1
 7 -8 3 10084 399 1
 -7 -8 -3 10176 381 1
 -7 -8 -3 10742 418 1
 -7 8 -3 9646 388 1
 7 8 3 9843 393 1
 -7 8 -3 9694 385 1
 -8 -8 -3 16545 632 1
 8 -8 3 16616 615 1
 -8 -8 -3 16845 593 1
 -8 8 -3 15568 594 1
 8 8 3 16194 609 1
 -8 8 -3 15953 608 1
 9 -8 3 336 57 1
 -9 -8 -3 337 52 1
 -9 -8 -3 428 77 1
 -9 8 -3 213 48 1
 9 8 3 255 50 1
 -9 8 -3 178 52 1
 -10 -8 -3 29 38 1
 -10 -8 -3 2 44 1
 10 -8 3 84 42 1
 -10 8 -3 157 51 1
 10 8 3 116 42 1
 -11 -8 -3 1675 109 1
 11 -8 3 1791 115 1
 -11 -8 -3 1569 127 1
 -11 8 -3 1631 108 1
 -12 -8 -3 1905 159 1
 -12 -8 -3 2047 131 1
 -12 8 -3 2032 134 1
 -13 -8 -3 3092 200 1
 -13 8 -3 3345 180 1
 -14 8 -3 411 76 1
 -14 -9 3 329 82 1
 -14 -9 3 407 70 1
 -14 9 3 641 86 1
 -14 9 3 378 87 1
 -13 -9 3 807 105 1
 -13 -9 3 933 103 1
 -13 9 3 1104 103 1
 -13 9 3 1170 116 1
 -12 -9 3 397 73 1
 -12 -9 3 274 75 1
 -12 9 3 318 72 1
 -12 9 3 250 56 1
 -11 -9 3 1122 119 1
 -11 -9 3 1083 99 1
 -11 9 3 1027 108 1
 -11 9 3 804 85 1
 -10 -9 3 188 47 1
 -10 -9 3 219 64 1
 -10 9 3 143 44 1
 -10 9 3 247 62 1
 -9 -9 3 1345 97 1
 -9 -9 3 1412 117 1
 -9 9 3 1206 95 1
 -9 9 3 1414 111 1
 -8 -9 3 101 44 1
 -8 -9 3 84 45 1
 -8 9 3 72 47 1
 -8 9 3 89 35 1
 -7 -9 3 6430 280 1
 7 -9 -3 6812 268 1
 -7 -9 3 6154 298 1
 -7 9 3 7131 278 1
 -7 9 3 6972 300 1
 -6 -9 3 6898 300 1
 -6 -9 3 7047 279 1
 6 -9 -3 7206 271 1
 6 9 -3 6493 258 1
 -6 9 3 6842 295 1
 -6 9 3 6768 270 1
 -5 -9 3 2640 149 1
 -5 -9 3 2765 136 1
 -5 9 3 2690 146 1
 -5 9 3 2750 132 1
 5 9 -3 2705 116 1
 -5 9 3 2649 128 1
 -4 -9 3 185 49 1
 -4 -9 3 144 39 1
 -4 9 3 168 41 1
 -4 9 3 116 40 1
 4 9 -3 133 27 1
 -4 9 3 147 32 1
 -3 -9 3 4701 201 1
 3 9 -3 4718 181 1
 -3 9 3 4378 199 1
 -3 9 3 4428 197 1
 -3 9 3 4594 177 1
 -2 -9 3 1336 84 1
 -2 -9 3 1271 74 1
 -2 9 3 1336 89 1
 -2 9 3 1250 66 1
 -1 -9 3 24245 883 1
 -1 9 3 23937 887 1
 -1 9 3 25489 895 1
 -1 9 3 25312 837 1
 0 -9 -3 3528 165 1
 0 -9 3 3556 160 1
 0 -9 3 3379 145 1
 0 9 3 3306 159 1
 -1 -9 -3 3228 153 1
 1 -9 3 3231 147 1
 1 9 3 2685 140 1
 -2 -9 -3 2107 117 1
 2 -9 3 1975 110 1
 -2 -9 -3 2120 85 1
 2 9 3 1950 106 1
 3 -9 3 1951 104 1
 -3 -9 -3 1928 82 1
 -3 -9 -3 1804 108 1
 3 9 3 1568 92 1
 -4 -9 -3 4010 178 1
 4 -9 3 3903 168 1
 -4 -9 -3 3982 149 1
 4 9 3 3335 159 1
 -4 9 -3 3269 142 1
 -4 9 -3 3211 154 1
 -5 -9 -3 622 54 1
 -5 -9 -3 596 67 1
 5 -9 3 665 69 1
 -5 9 -3 466 54 1
 -5 9 -3 581 48 1
 5 9 3 617 58 1
 -6 -9 -3 1699 92 1
 6 -9 3 1600 102 1
 -6 -9 -3 1745 117 1
 6 9 3 1591 96 1
 -6 9 -3 1912 103 1
 -6 9 -3 1748 90 1
 -7 -9 -3 19165 706 1
 -7 -9 -3 19393 752 1
 7 -9 3 19285 738 1
 -7 9 -3 20322 715 1
 7 9 3 19742 732 1
 -7 9 -3 19474 725 1
 -8 -9 -3 522 61 1
 8 -9 3 523 65 1
 -8 -9 -3 560 80 1
 -8 9 -3 501 60 1
 -8 9 -3 676 73 1
 8 9 3 631 66 1
 -9 -9 -3 280 62 1
 9 -9 3 414 61 1
 -9 -9 -3 321 52 1
 9 9 3 227 47 1
 -9 9 -3 275 54 1
 -10 -9 -3 955 104 1
 -10 -9 -3 666 75 1
 10 -9 3 860 85 1
 10 9 3 750 74 1
 -10 9 -3 666 79 1
 -11 -9 -3 216 64 1
 11 -9 3 178 47 1
 -11 -9 -3 132 45 1
 -11 9 -3 174 48 1
 -12 -9 -3 917 113 1
 -12 -9 -3 693 83 1
 -12 9 -3 999 99 1
 -13 -9 -3 4309 233 1
 -13 -9 -3 4391 213 1
 -13 9 -3 4337 214 1
 -14 9 -3 533 84 1
 -14 -10 3 279 82 1
 -14 -10 3 330 77 1
 -14 10 3 237 75 1
 -14 10 3 352 72 1
 -13 -10 3 812 93 1
 -13 -10 3 818 113 1
 -13 10 3 997 112 1
 -13 10 3 823 89 1
 -12 -10 3 1268 108 1
 -12 -10 3 1395 134 1
 -12 10 3 1368 126 1
 -12 10 3 1181 98 1
 -11 -10 3 504 75 1
 -11 -10 3 480 78 1
 -11 10 3 489 79 1
 -11 10 3 452 67 1
 -10 -10 3 2507 143 1
 -10 -10 3 2464 164 1
 -10 10 3 2548 140 1
 -10 10 3 2501 154 1
 -9 -10 3 1390 116 1
 -9 -10 3 1576 105 1
 -9 10 3 1497 117 1
 -9 10 3 1533 98 1
 -8 -10 3 460 63 1
 -8 -10 3 622 84 1
 -8 10 3 369 67 1
 -8 10 3 527 63 1
 -7 -10 3 9964 418 1
 -7 -10 3 10214 393 1
 7 -10 -3 10010 384 1
 -7 10 3 10067 411 1
 -7 10 3 10061 385 1
 -6 -10 3 5675 259 1
 6 -10 -3 5905 233 1
 -6 -10 3 5892 241 1
 6 10 -3 5318 218 1
 -6 10 3 5705 231 1
 -6 10 3 5585 251 1
 -5 -10 3 1499 103 1
 -5 -10 3 1495 94 1
 -5 10 3 1634 91 1
 5 10 -3 1559 75 1
 -5 10 3 1788 105 1
 -5 10 3 1506 85 1
 -4 -10 3 716 69 1
 -4 -10 3 908 72 1
 4 10 -3 944 55 1
 -4 10 3 1038 60 1
 -4 10 3 1098 79 1
 -4 10 3 977 72 1
 -3 -10 3 99 33 1
 -3 10 3 37 32 1
 -3 10 3 62 23 1
 -3 10 3 92 37 1
 3 10 -3 57 24 1
 -2 -10 3 8303 311 1
 -2 -10 3 8381 303 1
 -2 10 3 6503 306 1
 -2 10 3 7752 283 1
 -2 10 3 7674 312 1
 -1 -10 3 159 29 1
 -1 10 3 169 37 1
 -1 10 3 189 36 1
 0 -10 3 1131 69 1
 0 -10 -3 1099 88 1
 0 -10 3 1213 84 1
 0 10 3 1063 84 1
 1 -10 3 115 37 1
 -1 -10 -3 130 38 1
 1 10 3 47 27 1
 2 -10 3 5500 239 1
 -2 -10 -3 5843 209 1
 -2 -10 -3 5513 244 1
 2 10 3 5767 236 1
 -3 -10 -3 2038 127 1
 -3 -10 -3 2349 102 1
 3 -10 3 2301 125 1
 3 10 3 2698 123 1
 -4 -10 -3 955 87 1
 -4 -10 -3 918 64 1
 4 -10 3 779 79 1
 4 10 3 1454 84 1
 -4 10 -3 1488 84 1
 -4 10 -3 1310 61 1
 -5 -10 -3 748 80 1
 5 -10 3 859 71 1
 -5 -10 -3 784 60 1
 -5 10 -3 889 67 1
 5 10 3 792 71 1
 -5 10 -3 847 55 1
 6 -10 3 4925 221 1
 -6 -10 -3 4644 229 1
 -6 -10 -3 5222 204 1
 6 10 3 4739 211 1
 -6 10 -3 4941 212 1
 -6 10 -3 4777 200 1
 -7 -10 -3 12778 464 1
 7 -10 3 12736 486 1
 -7 -10 -3 12395 505 1
 -7 10 -3 11953 470 1
 7 10 3 12075 478 1
 -7 10 -3 12278 470 1
 -8 -10 -3 62 50 1
 -8 -10 -3 0 32 1
 8 -10 3 69 39 1
 -8 10 -3 97 38 1
 8 10 3 77 36 1
 -8 10 -3 103 37 1
 9 -10 3 840 82 1
 -9 -10 -3 898 83 1
 -9 -10 -3 861 97 1
 -9 10 -3 987 92 1
 9 10 3 946 82 1
 -10 -10 -3 1589 128 1
 -10 -10 -3 1399 104 1
 10 -10 3 1690 111 1
 10 10 3 1450 103 1
 -10 10 -3 1501 108 1
 -11 -10 -3 401 58 1
 11 -10 3 549 66 1
 -11 -10 -3 452 82 1
 -11 10 -3 460 64 1
 -12 -10 -3 170 52 1
 -12 -10 -3 205 74 1
 -12 10 -3 193 55 1
 -13 -10 -3 2313 147 1
 -13 -10 -3 2657 185 1
 -13 10 -3 2486 150 1
 -14 -10 -3 548 100 1
 -14 -10 -3 592 83 1
 -14 10 -3 522 85 1
 -14 -11 3 129 60 1
 -14 11 3 246 68 1
 -13 -11 3 853 100 1
 -13 -11 3 637 109 1
 -13 11 3 783 103 1
 -13 11 3 757 89 1
 -12 -11 3 3416 186 1
 -12 -11 3 3318 211 1
 -12 11 3 3544 197 1
 -12 11 3 3484 179 1
 -11 -11 3 197 69 1
 -11 -11 3 167 53 1
 -11 11 3 131 51 1
 -11 11 3 175 60 1
 -10 -11 3 1 32 1
 -10 -11 3 24 45 1
 -10 11 3 37 46 1
 -10 11 3 22 33 1
 -9 -11 3 1629 111 1
 -9 -11 3 1582 126 1
 -9 11 3 1766 105 1
 -9 11 3 1879 123 1
 -8 -11 3 1625 103 1
 -8 -11 3 1559 119 1
 -8 11 3 1701 102 1
 -8 11 3 1415 109 1
 -7 -11 3 13666 539 1
 7 -11 -3 14033 541 1
 -7 -11 3 14124 574 1
 -7 11 3 14489 535 1
 -7 11 3 14603 567 1
 6 -11 -3 1677 94 1
 -6 -11 3 1420 110 1
 -6 -11 3 1559 99 1
 -6 11 3 1877 113 1
 -6 11 3 1836 96 1
 6 11 -3 1591 82 1
 -5 -11 3 1177 92 1
 -5 -11 3 1071 81 1
 5 11 -3 935 62 1
 -5 11 3 1024 84 1
 -5 11 3 967 77 1
 -5 11 3 924 68 1
 -4 -11 3 603 72 1
 -4 -11 3 625 65 1
 4 11 -3 504 48 1
 -4 11 3 515 65 1
 -4 11 3 501 53 1
 -4 11 3 523 67 1
 -3 -11 3 3503 185 1
 3 11 -3 4382 175 1
 -3 11 3 4264 190 1
 -3 11 3 4136 192 1
 -3 11 3 4233 167 1
 -2 -11 3 1475 84 1
 -2 -11 3 1447 90 1
 -2 11 3 1442 94 1
 -2 11 3 1346 91 1
 2 11 -3 1365 83 1
 -2 11 3 1473 73 1
 -1 -11 3 6773 262 1
 -1 -11 3 6482 265 1
 -1 11 3 6708 272 1
 -1 11 3 6955 274 1
 0 -11 3 1638 78 1
 0 -11 -3 1636 96 1
 0 -11 3 1645 95 1
 0 11 3 1594 93 1
 -1 -11 -3 2572 134 1
 1 -11 3 2576 130 1
 1 11 3 2300 124 1
 -2 -11 -3 8410 299 1
 -2 -11 -3 8286 342 1
 2 -11 3 7891 333 1
 2 11 3 7985 329 1
 3 -11 3 1217 81 1
 -3 -11 -3 1189 60 1
 -3 -11 -3 1133 82 1
 3 11 3 1081 72 1
 -4 -11 -3 899 81 1
 -4 -11 -3 948 59 1
 4 -11 3 982 75 1
 4 11 3 1090 72 1
 -4 11 -3 1078 51 1
 5 -11 3 1692 111 1
 -5 -11 -3 1850 97 1
 -5 -11 -3 1628 115 1
 5 11 3 1617 103 1
 -5 11 -3 1542 100 1
 -5 11 -3 1800 89 1
 -6 -11 -3 1947 101 1
 -6 -11 -3 1775 122 1
 6 -11 3 1776 108 1
 -6 11 -3 2024 107 1
 -6 11 -3 1808 92 1
 6 11 3 2020 106 1
 7 -11 3 5412 238 1
 -7 -11 -3 5077 249 1
 -7 -11 -3 5401 223 1
 -7 11 -3 5372 221 1
 7 11 3 5306 229 1
 -7 11 -3 5277 228 1
 8 -11 3 423 61 1
 -8 -11 -3 437 72 1
 -8 -11 -3 444 56 1
 -8 11 -3 528 69 1
 8 11 3 485 58 1
 -9 -11 -3 392 55 1
 -9 -11 -3 344 68 1
 9 -11 3 285 53 1
 -9 11 -3 348 55 1
 9 11 3 333 51 1
 -10 -11 -3 426 77 1
 10 -11 3 383 62 1
 -10 -11 -3 515 67 1
 10 11 3 564 64 1
 -10 11 -3 490 67 1
 -11 -11 -3 106 63 1
 -11 -11 -3 139 48 1
 11 -11 3 149 50 1
 -11 11 -3 163 51 1
 -12 -11 -3 472 87 1
 -12 -11 -3 355 60 1
 -12 11 -3 405 67 1
 -13 -11 -3 309 64 1
 -13 11 -3 325 63 1
 -14 -11 -3 258 66 1
 -14 11 -3 203 56 1
 -14 -12 3 179 80 1
 -14 -12 3 275 69 1
 -14 12 3 216 62 1
 -13 -12 3 677 87 1
 -13 -12 3 645 105 1
 -13 12 3 545 86 1
 -13 12 3 676 82 1
 -12 -12 3 9809 440 1
 -12 -12 3 9908 412 1
 -12 12 3 9988 398 1
 -12 12 3 9759 431 1
 -11 -12 3 4824 249 1
 -11 -12 3 4741 221 1
 -11 12 3 4920 219 1
 -11 12 3 4661 238 1
 -10 -12 3 748 98 1
 -10 -12 3 602 74 1
 -10 12 3 598 81 1
 -10 12 3 534 71 1
 -9 -12 3 375 71 1
 -9 -12 3 271 51 1
 -9 12 3 264 58 1
 -9 12 3 240 50 1
 -8 -12 3 4466 217 1
 -8 -12 3 4665 234 1
 -8 12 3 5000 213 1
 -8 12 3 5094 232 1
 7 -12 -3 5050 215 1
 -7 -12 3 5189 246 1
 -7 -12 3 5453 229 1
 -7 12 3 5430 239 1
 -7 12 3 5088 219 1
 -6 -12 3 841 87 1
 -6 -12 3 848 80 1
 6 -12 -3 816 67 1
 6 12 -3 866 59 1
 -6 12 3 917 68 1
 -6 12 3 920 89 1
 -5 -12 3 350 62 1
 -5 -12 3 312 49 1
 -5 12 3 314 45 1
 5 12 -3 345 42 1
 -5 12 3 400 59 1
 -5 12 3 340 59 1
 -4 -12 3 371 57 1
 -4 -12 3 281 46 1
 -4 12 3 226 36 1
 -4 12 3 357 57 1
 -4 12 3 236 46 1
 4 12 -3 285 39 1
 -3 -12 3 252 48 1
 -3 12 3 333 40 1
 3 12 -3 365 46 1
 -3 12 3 325 53 1
 -2 -12 3 540 58 1
 -2 12 3 653 45 1
 -2 12 3 528 61 1
 2 12 -3 678 59 1
 -2 12 3 710 66 1
 -1 -12 3 1418 92 1
 -1 -12 3 1385 86 1
 -1 12 3 1428 96 1
 -1 12 3 1654 97 1
 0 -12 -3 336 50 1
 0 -12 3 319 33 1
 0 -12 3 256 41 1
 0 12 3 161 40 1
 1 -12 3 146 40 1
 -1 -12 -3 114 40 1
 1 12 3 95 34 1
 2 -12 3 4642 213 1
 -2 -12 -3 5147 184 1
 -2 -12 -3 5155 220 1
 2 12 3 4665 209 1
 3 -12 3 185 42 1
 -3 -12 -3 200 48 1
 -3 -12 -3 303 34 1
 3 12 3 398 50 1
 -4 -12 -3 1290 99 1
 4 -12 3 1563 97 1
 -4 -12 -3 1540 78 1
 4 12 3 1286 86 1
 -5 -12 -3 3009 138 1
 5 -12 3 3369 161 1
 -5 -12 -3 3143 164 1
 -5 12 -3 3048 148 1
 5 12 3 3130 151 1
 -5 12 -3 3082 130 1
 6 -12 3 1687 101 1
 -6 -12 -3 1439 112 1
 -6 -12 -3 1495 87 1
 -6 12 -3 1656 97 1
 6 12 3 1552 96 1
 -6 12 -3 1601 82 1
 7 -12 3 526 68 1
 -7 -12 -3 530 75 1
 -7 -12 -3 612 64 1
 -7 12 -3 544 68 1
 7 12 3 665 69 1
 -7 12 -3 581 57 1
 8 -12 3 5769 249 1
 -8 -12 -3 6041 271 1
 -8 -12 -3 5642 237 1
 8 12 3 5477 242 1
 -8 12 -3 5364 240 1
 9 -12 3 764 77 1
 -9 -12 -3 736 72 1
 -9 -12 -3 871 97 1
 9 12 3 600 68 1
 -9 12 -3 601 70 1
 -10 -12 -3 0 47 1
 10 -12 3 14 37 1
 -10 -12 -3 0 34 1
 10 12 3 29 35 1
 -10 12 -3 0 34 1
 11 -12 3 185 51 1
 -11 -12 -3 113 62 1
 -11 -12 -3 285 56 1
 -11 12 -3 209 54 1
 -12 -12 -3 1139 101 1
 -12 -12 -3 1120 115 1
 -12 12 -3 1117 99 1
 -13 -12 -3 1744 128 1
 -13 -12 -3 1961 155 1
 -13 12 -3 1954 135 1
 -14 -12 -3 52 52 1
 -14 -12 -3 84 71 1
 -14 12 -3 174 63 1
 -14 -13 3 615 93 1
 -14 -13 3 727 112 1
 -14 13 3 713 81 1
 -13 -13 3 0 58 1
 -13 -13 3 0 50 1
 -13 13 3 22 46 1
 -12 -13 3 1287 108 1
 -12 -13 3 1178 126 1
 -12 13 3 1567 123 1
 -12 13 3 1679 114 1
 -11 -13 3 2273 147 1
 -11 -13 3 2426 164 1
 -11 13 3 2646 139 1
 -11 13 3 2746 157 1
 -10 -13 3 1152 97 1
 -10 -13 3 1135 113 1
 -10 13 3 1193 89 1
 -10 13 3 1236 105 1
 -9 -13 3 2237 154 1
 -9 -13 3 2314 134 1
 -9 13 3 2561 146 1
 -9 13 3 2459 132 1
 -8 -13 3 502 76 1
 -8 -13 3 382 61 1
 -8 13 3 577 64 1
 -8 13 3 468 66 1
 -7 -13 3 6659 271 1
 -7 -13 3 6264 286 1
 7 -13 -3 6579 262 1
 -7 13 3 6284 278 1
 -7 13 3 6112 257 1
 6 -13 -3 6837 272 1
 -6 -13 3 7042 275 1
 -6 -13 3 6849 295 1
 6 13 -3 6299 256 1
 -6 13 3 6201 259 1
 -6 13 3 6325 279 1
 -5 -13 3 1901 112 1
 -5 -13 3 1956 123 1
 -5 13 3 1669 97 1
 -5 13 3 1998 117 1
 5 13 -3 1759 95 1
 -5 13 3 1765 112 1
 -4 -13 3 847 84 1
 -4 13 3 785 58 1
 -4 13 3 623 68 1
 -4 13 3 718 78 1
 4 13 -3 750 59 1
 3 13 -3 1545 84 1
 -2 -13 3 269 44 1
 -2 13 3 223 43 1
 -2 13 3 214 48 1
 -2 13 3 229 32 1
 2 13 -3 196 40 1
 -1 -13 3 48 31 1
 1 -13 -3 38 32 1
 -1 -13 3 35 26 1
 -1 13 3 1 32 1
 -1 13 3 34 27 1
 0 -13 3 0 28 1
 0 -13 -3 29 28 1
 0 -13 3 15 21 1
 0 13 3 48 32 1
 -1 -13 -3 848 80 1
 1 -13 3 749 71 1
 1 13 3 770 65 1
 2 -13 3 9766 381 1
 -2 -13 -3 9379 342 1
 -2 -13 -3 10150 388 1
 2 13 3 9723 376 1
 -3 -13 -3 925 59 1
 3 -13 3 883 76 1
 -3 -13 -3 813 87 1
 3 13 3 933 72 1
 4 -13 3 1498 97 1
 -4 -13 -3 1447 74 1
 -4 -13 -3 1415 98 1
 4 13 3 1336 85 1
 -5 -13 -3 2120 103 1
 -5 -13 -3 2292 133 1
 5 -13 3 2009 120 1
 5 13 3 2097 114 1
 -5 13 -3 1891 92 1
 -5 13 -3 2124 114 1
 6 -13 3 1350 99 1
 -6 -13 -3 1327 84 1
 -6 -13 -3 1413 113 1
 6 13 3 1481 94 1
 -6 13 -3 1500 99 1
 -6 13 -3 1346 77 1
 -7 -13 -3 12412 507 1
 -7 -13 -3 12593 466 1
 7 -13 3 12601 493 1
 7 13 3 12459 482 1
 -7 13 -3 12594 474 1
 8 -13 3 1660 107 1
 -8 -13 -3 1553 116 1
 -8 -13 -3 1599 98 1
 8 13 3 1491 98 1
 -8 13 -3 1632 105 1
 -9 -13 -3 415 73 1
 9 -13 3 407 62 1
 -9 -13 -3 473 58 1
 -9 13 -3 405 62 1
 9 13 3 422 56 1
 -10 -13 -3 41 52 1
 10 -13 3 0 37 1
 -10 -13 -3 0 33 1
 10 13 3 0 33 1
 -10 13 -3 0 38 1
 11 -13 3 280 60 1
 -11 -13 -3 245 54 1
 -11 -13 -3 374 78 1
 -11 13 -3 267 60 1
 -12 -13 -3 557 74 1
 -12 -13 -3 668 97 1
 -12 13 -3 697 87 1
 -13 -13 -3 2971 179 1
 -13 -13 -3 3208 203 1
 -13 13 -3 3204 180 1
 -14 -13 -3 240 82 1
 -14 -13 -3 326 69 1
 -14 13 -3 322 73 1
 -14 14 3 689 89 1
 -13 -14 3 1148 106 1
 -13 -14 3 1172 127 1
 -13 14 3 1137 95 1
 -13 14 3 1117 113 1
 -12 -14 3 159 57 1
 -12 -14 3 28 59 1
 -12 14 3 160 54 1
 -12 14 3 114 60 1
 -11 -14 3 58 52 1
 -11 -14 3 60 43 1
 -11 14 3 133 56 1
 -11 14 3 76 46 1
 -10 -14 3 1690 125 1
 -10 -14 3 1642 113 1
 -10 14 3 1503 105 1
 -10 14 3 1643 122 1
 -9 -14 3 1059 88 1
 -9 -14 3 995 102 1
 -9 14 3 996 85 1
 -9 14 3 1178 99 1
 -8 -14 3 703 81 1
 -8 -14 3 720 91 1
 -8 14 3 859 88 1
 -8 14 3 854 80 1
 7 -14 -3 6732 273 1
 -7 -14 3 6245 297 1
 -7 -14 3 6759 281 1
 -7 14 3 6445 266 1
 -7 14 3 6520 286 1
 6 -14 -3 1790 107 1
 -6 -14 3 1772 108 1
 -6 -14 3 1628 119 1
 -6 14 3 1906 116 1
 -6 14 3 1886 101 1
 6 14 -3 1763 94 1
 -5 -14 3 1473 95 1
 -5 -14 3 1479 106 1
 -5 14 3 1687 88 1
 5 14 -3 1464 85 1
 -5 14 3 1450 99 1
 -5 14 3 1411 100 1
 -4 -14 3 1195 95 1
 -4 14 3 1174 89 1
 4 14 -3 1228 80 1
 -4 14 3 1176 97 1
 -4 14 3 1160 75 1
 -3 -14 3 2879 132 1
 -3 14 3 1978 127 1
 -3 14 3 2086 104 1
 3 14 -3 2217 115 1
 -3 14 3 2263 123 1
 -2 14 3 374 60 1
 2 14 -3 440 55 1
 -2 14 3 350 51 1
 1 -14 -3 260 49 1
 -1 -14 3 161 44 1
 -1 -14 3 243 40 1
 -1 14 3 157 45 1
 0 -14 3 959 74 1
 0 -14 3 972 58 1
 0 -14 -3 1064 80 1
 0 14 3 983 76 1
 1 -14 3 213 45 1
 -1 -14 -3 112 38 1
 1 14 3 172 39 1
 -2 -14 -3 3131 131 1
 2 -14 3 3260 161 1
 -2 -14 -3 3100 163 1
 2 14 3 2979 151 1
 -3 -14 -3 1167 94 1
 -3 -14 -3 1270 67 1
 3 -14 3 1128 86 1
 3 14 3 1003 80 1
 4 -14 3 5440 244 1
 -4 -14 -3 5301 213 1
 -4 -14 -3 5226 248 1
 4 14 3 5208 232 1
 -5 -14 -3 280 40 1
 5 -14 3 256 52 1
 -5 -14 -3 242 58 1
 5 14 3 325 51 1
 -5 14 -3 271 31 1
 -6 -14 -3 720 88 1
 6 -14 3 614 71 1
 -6 -14 -3 608 58 1
 -6 14 -3 614 50 1
 6 14 3 628 64 1
 -6 14 -3 735 74 1
 -7 -14 -3 827 98 1
 -7 -14 -3 988 75 1
 7 -14 3 1034 89 1
 7 14 3 1134 83 1
 -7 14 -3 1140 85 1
 -8 -14 -3 309 51 1
 -8 -14 -3 200 58 1
 8 -14 3 264 54 1
 8 14 3 255 48 1
 -8 14 -3 237 50 1
 -9 -14 -3 2067 147 1
 9 -14 3 1994 126 1
 -9 -14 -3 2328 127 1
 9 14 3 2119 124 1
 -9 14 -3 2041 128 1
 -10 -14 -3 423 61 1
 10 -14 3 373 62 1
 -10 -14 -3 271 72 1
 10 14 3 365 56 1
 -10 14 -3 349 64 1
 -11 -14 -3 439 83 1
 11 -14 3 565 76 1
 -11 -14 -3 543 73 1
 -11 14 -3 618 79 1
 -12 -14 -3 348 68 1
 -12 -14 -3 345 79 1
 -12 14 -3 399 71 1
 -13 -14 -3 1362 117 1
 -13 -14 -3 1653 155 1
 -13 14 -3 1592 116 1
 -14 -14 -3 463 80 1
 -14 14 -3 318 74 1
 -14 -15 3 1640 125 1
 -14 -15 3 1440 153 1
 -14 15 3 1646 123 1
 -13 -15 3 782 97 1
 -13 -15 3 661 104 1
 -13 15 3 641 78 1
 -12 -15 3 211 65 1
 -12 -15 3 228 62 1
 -12 15 3 249 64 1
 -12 15 3 284 59 1
 -11 -15 3 129 54 1
 -11 -15 3 119 60 1
 -11 15 3 212 58 1
 -11 15 3 140 49 1
 -10 -15 3 529 70 1
 -10 -15 3 505 83 1
 -10 15 3 419 59 1
 -10 15 3 555 76 1
 -9 -15 3 140 50 1
 -9 -15 3 165 61 1
 -9 15 3 5 31 1
 -9 15 3 106 50 1
 -8 -15 3 471 64 1
 -8 -15 3 536 80 1
 -8 15 3 548 72 1
 -8 15 3 494 63 1
 -7 -15 3 6930 309 1
 7 -15 -3 7031 288 1
 -7 -15 3 6931 291 1
 -7 15 3 6886 297 1
 -7 15 3 6822 278 1
 -6 -15 3 95 46 1
 -6 -15 3 46 35 1
 6 15 -3 57 33 1
 -6 15 3 59 42 1
 -6 15 3 35 31 1
 -6 15 3 50 37 1
 -5 -15 3 581 69 1
 -5 -15 3 641 82 1
 -5 15 3 620 71 1
 -5 15 3 782 84 1
 -5 15 3 695 65 1
 5 15 -3 696 64 1
 -4 -15 3 1292 94 1
 -4 15 3 1128 73 1
 -4 15 3 1213 86 1
 4 15 -3 1237 80 1
 -3 15 3 598 50 1
 -3 15 3 670 70 1
 -3 15 3 659 75 1
 3 15 -3 664 64 1
 -2 -15 3 1893 112 1
 -2 15 3 2379 121 1
 2 15 -3 2209 117 1
 -2 15 3 2284 128 1
 -1 -15 3 5240 228 1
 1 -15 -3 5335 229 1
 -1 -15 3 5241 216 1
 -1 15 3 5185 233 1
 1 15 -3 5394 230 1
 0 -15 -3 3416 172 1
 0 -15 3 3267 170 1
 0 -15 3 3256 148 1
 0 15 3 3903 174 1
 -1 -15 -3 188 49 1
 1 -15 3 174 41 1
 1 15 3 133 42 1
 -2 -15 -3 1937 114 1
 2 -15 3 1999 112 1
 2 15 3 1931 106 1
 3 -15 3 260 53 1
 -3 -15 -3 173 45 1
 -3 -15 -3 239 34 1
 3 15 3 409 55 1
 4 -15 3 3365 167 1
 -4 -15 -3 3200 139 1
 -4 -15 -3 2902 167 1
 4 15 3 3252 155 1
 -5 -15 -3 141 35 1
 5 -15 3 139 44 1
 -5 -15 -3 171 51 1
 5 15 3 209 46 1
 -5 15 -3 188 27 1
 -6 -15 -3 434 51 1
 6 -15 3 448 65 1
 -6 -15 -3 499 77 1
 6 15 3 404 57 1
 -6 15 -3 351 54 1
 -7 -15 -3 1259 116 1
 7 -15 3 1110 94 1
 -7 -15 -3 1218 83 1
 7 15 3 1215 88 1
 -7 15 -3 1115 91 1
 -8 -15 -3 65 51 1
 8 -15 3 58 41 1
 -8 -15 -3 29 34 1
 -8 15 -3 0 31 1
 8 15 3 37 37 1
 9 -15 3 862 84 1
 -9 -15 -3 858 80 1
 -9 -15 -3 828 98 1
 9 15 3 738 75 1
 -9 15 -3 829 82 1
 -10 -15 -3 10 47 1
 10 -15 3 9 38 1
 -10 -15 -3 25 37 1
 -10 15 -3 0 40 1
 10 15 3 12 38 1
 11 -15 3 2488 143 1
 -11 -15 -3 2373 165 1
 -11 -15 -3 2263 139 1
 -11 15 -3 2325 144 1
 -12 -15 -3 170 70 1
 -12 -15 -3 241 58 1
 -12 15 -3 226 62 1
 -13 -15 -3 726 88 1
 -13 -15 -3 656 107 1
 -13 15 -3 806 93 1
 -14 -15 -3 98 73 1
 -14 -15 -3 0 47 1
 -14 15 -3 115 60 1
 -14 -16 3 1204 120 1
 -14 16 3 1262 112 1
 -13 -16 3 62 55 1
 -13 -16 3 111 70 1
 -13 16 3 120 50 1
 -12 -16 3 965 103 1
 -12 -16 3 983 109 1
 -12 16 3 1213 100 1
 -12 16 3 1114 115 1
 -11 -16 3 2408 145 1
 -11 -16 3 2526 169 1
 -11 16 3 2571 152 1
 -11 16 3 2520 139 1
 -10 -16 3 1759 123 1
 -10 -16 3 1800 138 1
 -10 16 3 1788 114 1
 -10 16 3 1855 124 1
 -9 -16 3 214 67 1
 -9 -16 3 210 56 1
 -9 16 3 310 53 1
 -9 16 3 268 59 1
 8 -16 -3 155 43 1
 -8 -16 3 68 39 1
 -8 -16 3 105 57 1
 -8 16 3 178 46 1
 -8 16 3 96 49 1
 -7 -16 3 837 98 1
 -7 -16 3 789 84 1
 7 -16 -3 1045 83 1
 -6 -16 3 503 73 1
 -6 -16 3 415 56 1
 -6 16 3 536 69 1
 -6 16 3 525 67 1
 -6 16 3 367 48 1
 6 16 -3 563 57 1
 -5 -16 3 3726 177 1
 -5 -16 3 3688 168 1
 5 16 -3 3125 154 1
 -5 16 3 3308 175 1
 -5 16 3 3204 150 1
 -5 16 3 3187 165 1
 -4 -16 3 110 43 1
 -4 16 3 98 41 1
 -4 16 3 122 31 1
 4 16 -3 162 40 1
 -4 16 3 53 38 1
 -3 -16 3 2810 144 1
 3 16 -3 2674 138 1
 -3 16 3 2469 138 1
 -3 16 3 2543 152 1
 -3 16 3 2508 122 1
 -2 16 3 256 54 1
 -2 16 3 299 47 1
 2 16 -3 290 47 1
 1 -16 -3 5352 233 1
 -1 -16 3 5399 221 1
 -1 16 3 5563 242 1
 1 16 -3 5379 235 1
 0 -16 -3 337 52 1
 0 -16 3 355 38 1
 0 -16 3 413 57 1
 0 16 3 237 46 1
 1 -16 3 311 53 1
 -1 -16 -3 234 49 1
 1 16 3 245 46 1
 2 -16 3 1389 100 1
 -2 -16 -3 1423 101 1
 2 16 3 1703 99 1
 3 -16 3 1072 87 1
 -3 -16 -3 1096 91 1
 -3 -16 -3 1211 69 1
 3 16 3 1117 83 1
 -4 -16 -3 6084 274 1
 4 -16 3 6135 269 1
 -4 -16 -3 6275 239 1
 4 16 3 6281 262 1
 -5 -16 -3 1558 117 1
 5 -16 3 1634 111 1
 -5 -16 -3 1737 92 1
 5 16 3 1619 99 1
 6 -16 3 1585 112 1
 -6 -16 -3 1704 95 1
 -6 -16 -3 1656 123 1
 6 16 3 1613 103 1
 -7 -16 -3 363 50 1
 7 -16 3 424 63 1
 -7 -16 -3 370 73 1
 -7 16 -3 437 59 1
 7 16 3 384 54 1
 8 -16 3 203 50 1
 -8 -16 -3 262 67 1
 -8 -16 -3 231 47 1
 -8 16 -3 167 47 1
 8 16 3 280 50 1
 -9 -16 -3 3006 184 1
 -9 -16 -3 3234 158 1
 9 -16 3 2931 161 1
 9 16 3 3084 155 1
 -9 16 -3 2938 155 1
 -10 -16 -3 92 57 1
 -10 -16 -3 11 37 1
 10 -16 3 45 43 1
 10 16 3 1 36 1
 -10 16 -3 12 42 1
 -11 -16 -3 575 78 1
 -11 -16 -3 799 108 1
 11 -16 3 1007 96 1
 -11 16 -3 991 99 1
 -12 -16 -3 68 46 1
 -12 -16 -3 74 65 1
 -12 16 -3 146 57 1
 -13 -16 -3 149 52 1
 -13 16 -3 118 60 1
 -14 -17 3 662 109 1
 -14 17 3 505 80 1
 -13 -17 3 481 96 1
 -13 -17 3 482 76 1
 -13 17 3 481 73 1
 -12 -17 3 210 64 1
 -12 -17 3 169 64 1
 -12 17 3 193 51 1
 -12 17 3 108 53 1
 -11 -17 3 573 92 1
 -11 -17 3 752 91 1
 -11 17 3 636 83 1
 -11 17 3 763 82 1
 -10 -17 3 118 45 1
 -10 -17 3 61 53 1
 -10 17 3 94 47 1
 -10 17 3 112 41 1
 -9 -17 3 370 60 1
 -9 -17 3 349 73 1
 -9 17 3 334 56 1
 -9 17 3 286 60 1
 -8 -17 3 147 60 1
 -8 -17 3 234 53 1
 8 -17 -3 159 44 1
 -8 17 3 283 52 1
 -8 17 3 161 51 1
 -7 -17 3 1225 94 1
 7 -17 -3 1147 89 1
 -7 -17 3 1137 109 1
 -7 17 3 1111 82 1
 -7 17 3 1139 92 1
 -6 -17 3 157 53 1
 -6 -17 3 124 43 1
 -6 17 3 106 45 1
 -6 17 3 211 51 1
 -6 17 3 143 40 1
 6 17 -3 144 41 1
 -5 -17 3 7097 304 1
 -5 -17 3 7247 292 1
 5 17 -3 6864 281 1
 -5 17 3 5335 291 1
 -5 17 3 7063 272 1
 -5 17 3 6808 290 1
 -4 -17 3 19 40 1
 -4 17 3 26 44 1
 -4 17 3 3 35 1
 4 17 -3 60 36 1
 -4 17 3 12 25 1
 -3 -17 3 1102 84 1
 -3 17 3 1039 98 1
 -3 17 3 1004 81 1
 3 17 -3 1050 79 1
 -2 -17 3 1221 77 1
 -2 17 3 905 73 1
 2 17 -3 855 78 1
 -2 17 3 983 96 1
 -1 -17 3 379 45 1
 1 -17 -3 392 51 1
 1 17 -3 405 55 1
 -1 17 3 381 53 1
 0 -17 3 88 40 1
 0 -17 3 53 24 1
 0 -17 -3 117 40 1
 0 17 3 122 40 1
 -1 -17 -3 90 37 1
 1 -17 3 61 39 1
 1 17 3 1 30 1
 -2 -17 -3 6857 287 1
 2 -17 3 6985 287 1
 2 17 3 5854 272 1
 3 -17 3 2616 151 1
 -3 -17 -3 2787 158 1
 -3 -17 -3 2895 129 1
 3 17 3 2907 149 1
 4 -17 3 3472 178 1
 -4 -17 -3 3493 151 1
 -4 -17 -3 3360 180 1
 4 17 3 3394 168 1
 5 -17 3 3178 176 1
 -5 -17 -3 3534 187 1
 -5 -17 -3 3611 154 1
 5 17 3 3160 167 1
 -6 -17 -3 4386 220 1
 6 -17 3 4104 205 1
 -6 -17 -3 4284 185 1
 6 17 3 4193 197 1
 -7 -17 -3 37 48 1
 -7 -17 -3 0 28 1
 7 -17 3 0 33 1
 7 17 3 54 35 1
 -7 17 -3 43 35 1
 -8 -17 -3 8135 318 1
 -8 -17 -3 7949 353 1
 8 -17 3 7585 334 1
 8 17 3 8014 326 1
 -8 17 -3 7767 323 1
 -9 -17 -3 3853 213 1
 9 -17 3 3996 194 1
 -9 -17 -3 3429 175 1
 -9 17 -3 3797 184 1
 9 17 3 3737 181 1
 -10 -17 -3 95 45 1
 10 -17 3 74 47 1
 -10 -17 -3 66 62 1
 -10 17 -3 88 49 1
 10 17 3 89 44 1
 -11 -17 -3 277 82 1
 -11 -17 -3 182 52 1
 11 -17 3 132 51 1
 -11 17 -3 237 59 1
 -12 -17 -3 660 82 1
 -12 -17 -3 765 107 1
 -12 17 -3 697 84 1
 -13 -17 -3 369 69 1
 -13 -17 -3 277 85 1
 -13 17 -3 396 71 1
 -13 -18 3 1519 152 1
 -13 -18 3 1670 134 1
 -13 18 3 1750 126 1
 -12 -18 3 125 59 1
 -12 -18 3 193 71 1
 -12 18 3 168 53 1
 -11 -18 3 161 67 1
 -11 -18 3 182 53 1
 -11 18 3 185 54 1
 -11 18 3 202 61 1
 -10 -18 3 603 93 1
 -10 -18 3 632 81 1
 -10 18 3 603 80 1
 -10 18 3 619 75 1
 -9 -18 3 1236 112 1
 -9 -18 3 1285 122 1
 -9 18 3 1095 87 1
 -9 18 3 1171 100 1
 -8 -18 3 59 43 1
 -8 -18 3 33 46 1
 8 -18 -3 73 40 1
 -8 18 3 119 42 1
 -8 18 3 40 43 1
 -7 -18 3 486 66 1
 7 -18 -3 535 67 1
 -7 -18 3 498 73 1
 -7 18 3 511 70 1
 -7 18 3 505 63 1
 -6 -18 3 612 77 1
 -6 -18 3 828 81 1
 6 18 -3 643 64 1
 -6 18 3 525 70 1
 -6 18 3 653 64 1
 -6 18 3 643 70 1
 -5 -18 3 4089 202 1
 -5 -18 3 3740 193 1
 5 18 -3 3965 184 1
 -5 18 3 4119 176 1
 -5 18 3 4174 191 1
 -4 -18 3 283 55 1
 -4 18 3 419 49 1
 -4 18 3 434 62 1
 4 18 -3 342 52 1
 -4 18 3 448 70 1
 -3 -18 3 13629 546 1
 -3 18 3 14942 566 1
 3 18 -3 14838 547 1
 -3 18 3 14339 545 1
 -2 -18 3 16544 625 1
 2 -18 -3 16902 632 1
 2 18 -3 16393 634 1
 -2 18 3 16529 646 1
 -2 18 3 16542 629 1
 -1 -18 3 1535 89 1
 1 -18 -3 1518 100 1
 -1 18 3 1579 107 1
 1 18 -3 1610 104 1
 0 -18 -3 1319 96 1
 0 -18 3 1276 76 1
 0 -18 3 1385 101 1
 0 18 3 1340 101 1
 -1 -18 -3 2018 125 1
 1 -18 3 1921 121 1
 1 -18 3 1798 88 1
 1 18 3 2026 121 1
 2 -18 3 1148 97 1
 -2 -18 -3 1192 93 1
 2 18 3 1198 91 1
 3 -18 3 583 73 1
 -3 -18 -3 571 51 1
 -3 -18 -3 616 79 1
 3 18 3 360 55 1
 -4 -18 -3 850 91 1
 4 -18 3 1075 91 1
 -4 -18 -3 1276 73 1
 4 18 3 1515 94 1
 -5 -18 -3 1160 74 1
 -5 -18 -3 1119 97 1
 5 -18 3 1055 90 1
 5 18 3 1204 88 1
 -6 -18 -3 2841 133 1
 6 -18 3 2848 152 1
 -6 -18 -3 2755 161 1
 6 18 3 2570 143 1
 7 -18 3 557 73 1
 -7 -18 -3 443 83 1
 -7 -18 -3 654 64 1
 7 18 3 426 63 1
 -8 -18 -3 133 55 1
 -8 -18 -3 183 42 1
 8 -18 3 170 51 1
 -8 18 -3 122 44 1
 8 18 3 174 46 1
 -9 -18 -3 10385 408 1
 -9 -18 -3 10472 444 1
 9 -18 3 10261 434 1
 -9 18 -3 10533 414 1
 9 18 3 10443 416 1
 -10 -18 -3 1030 120 1
 10 -18 3 1055 97 1
 -10 -18 -3 1405 96 1
 -10 18 -3 1139 103 1
 10 18 3 949 89 1
 -11 -18 -3 1676 149 1
 -11 -18 -3 1451 107 1
 11 -18 3 1530 113 1
 -11 18 -3 1635 118 1
 -12 -18 -3 863 89 1
 -12 -18 -3 791 113 1
 -12 18 -3 630 80 1
 -13 -18 -3 147 55 1
 -13 -18 -3 262 81 1
 -13 18 -3 131 53 1
 -13 -19 3 589 103 1
 -13 19 3 586 81 1
 -12 -19 3 357 85 1
 -12 -19 3 406 68 1
 -12 19 3 435 67 1
 -11 -19 3 117 65 1
 -11 -19 3 146 55 1
 -11 19 3 52 40 1
 -11 19 3 15 47 1
 -10 -19 3 206 53 1
 -10 -19 3 204 68 1
 -10 19 3 93 51 1
 -10 19 3 181 46 1
 -9 -19 3 118 44 1
 -9 -19 3 74 58 1
 -9 19 3 142 52 1
 -9 19 3 141 45 1
 8 -19 -3 6 38 1
 -8 -19 3 128 44 1
 -8 -19 3 0 42 1
 -8 19 3 87 44 1
 -8 19 3 62 37 1
 7 -19 -3 366 61 1
 -7 -19 3 427 72 1
 -7 -19 3 355 63 1
 -7 19 3 466 66 1
 -7 19 3 442 57 1
 -6 -19 3 2042 125 1
 -6 -19 3 2273 142 1
 6 19 -3 2237 119 1
 -6 19 3 2107 136 1
 -6 19 3 2281 127 1
 -6 19 3 2145 116 1
 -5 -19 3 370 68 1
 -5 -19 3 274 53 1
 -5 19 3 242 46 1
 -5 19 3 222 57 1
 5 19 -3 267 50 1
 -5 19 3 300 54 1
 -4 -19 3 2622 145 1
 -4 19 3 2329 136 1
 -4 19 3 2423 122 1
 -4 19 3 2302 153 1
 4 19 -3 2383 134 1
 -3 -19 3 53845 1953 1
 -3 19 3 54296 1950 1
 3 19 -3 54466 1951 1
 -3 19 3 53854 1970 1
 -2 -19 3 7277 290 1
 2 -19 -3 7137 295 1
 -2 19 3 7085 310 1
 2 19 -3 6675 297 1
 -1 -19 3 484 51 1
 1 -19 -3 495 57 1
 1 19 -3 473 62 1
 -1 19 3 391 61 1
 0 -19 3 12724 500 1
 0 -19 -3 12994 496 1
 0 -19 3 13060 472 1
 0 19 -3 12902 503 1
 0 19 3 12200 497 1
 -1 -19 -3 4703 216 1
 1 -19 3 4501 179 1
 1 -19 3 4465 217 1
 1 19 3 4502 211 1
 -2 -19 -3 2121 127 1
 2 -19 3 2196 132 1
 2 19 3 2182 126 1
 -3 -19 -3 529 69 1
 -3 -19 -3 513 52 1
 3 -19 3 481 66 1
 3 19 3 427 60 1
 -4 -19 -3 823 61 1
 4 -19 3 797 84 1
 -4 -19 -3 708 82 1
 4 19 3 922 76 1
 5 -19 3 84 45 1
 -5 -19 -3 47 30 1
 -5 -19 -3 90 49 1
 5 19 3 32 34 1
 -6 -19 -3 2076 113 1
 6 -19 3 2127 134 1
 -6 -19 -3 2327 147 1
 6 19 3 2063 123 1
 7 -19 3 405 64 1
 -7 -19 -3 512 59 1
 -7 -19 -3 490 78 1
 7 19 3 558 69 1
 8 -19 3 294 60 1
 -8 -19 -3 323 73 1
 -8 -19 -3 255 47 1
 8 19 3 429 63 1
 -8 19 -3 299 54 1
 -9 -19 -3 1504 129 1
 9 -19 3 1345 108 1
 -9 -19 -3 1199 95 1
 -9 19 -3 1285 104 1
 9 19 3 1232 97 1
 10 -19 3 399 72 1
 -10 -19 -3 364 84 1
 -10 -19 -3 260 54 1
 10 19 3 293 60 1
 -10 19 -3 394 68 1
 11 -19 3 1593 119 1
 -11 -19 -3 1266 126 1
 -11 -19 -3 1387 109 1
 -11 19 -3 1308 110 1
 -12 -19 -3 84 50 1
 -12 -19 -3 46 69 1
 -12 19 -3 135 59 1
 -13 -19 -3 210 85 1
 -13 19 -3 323 77 1
 -13 -20 3 230 68 1
 -13 -20 3 123 75 1
 -13 20 3 225 62 1
 -12 -20 3 651 103 1
 -12 -20 3 709 101 1
 -12 20 3 868 94 1
 -11 -20 3 258 66 1
 -11 -20 3 162 61 1
 -11 20 3 288 59 1
 -11 20 3 161 62 1
 -10 -20 3 215 73 1
 -10 -20 3 306 64 1
 -10 20 3 222 56 1
 -10 20 3 229 59 1
 -9 -20 3 447 82 1
 -9 -20 3 369 69 1
 -9 20 3 464 71 1
 -9 20 3 527 67 1
 -8 -20 3 630 85 1
 8 -20 -3 721 80 1
 -8 -20 3 776 90 1
 -8 20 3 761 84 1
 -8 20 3 744 75 1
 -7 -20 3 1410 113 1
 -7 -20 3 1121 93 1
 7 -20 -3 1137 97 1
 -7 20 3 1105 85 1
 -7 20 3 1009 91 1
 -6 -20 3 893 99 1
 -6 -20 3 1066 97 1
 6 20 -3 901 79 1
 -6 20 3 925 75 1
 -6 20 3 980 82 1
 -5 -20 3 771 84 1
 -5 20 3 701 63 1
 5 20 -3 775 73 1
 -5 20 3 739 87 1
 -5 20 3 797 77 1
 -4 -20 3 6737 298 1
 4 20 -3 6901 292 1
 -4 20 3 6987 290 1
 -4 20 3 6828 311 1
 -3 -20 3 10122 419 1
 3 20 -3 10292 421 1
 -3 20 3 11031 420 1
 -3 20 3 11192 444 1
 2 -20 -3 12122 495 1
 -2 -20 3 12320 491 1
 2 20 -3 13159 505 1
 -2 20 3 13763 521 1
 -1 -20 3 1489 93 1
 1 -20 -3 1470 101 1
 1 20 -3 1497 107 1
 -1 20 3 1490 111 1
 0 -20 3 1490 83 1
 0 -20 -3 1408 100 1
 0 -20 3 1447 106 1
 0 20 -3 1719 111 1
 0 20 3 1710 112 1
 1 -20 3 1350 104 1
 1 -20 3 1415 75 1
 -1 -20 -3 1442 104 1
 1 20 3 1854 113 1
 -2 -20 -3 475 68 1
 2 -20 3 346 62 1
 2 20 3 505 67 1
 -3 -20 -3 310 41 1
 3 -20 3 263 57 1
 -3 -20 -3 307 59 1
 3 20 3 162 43 1
 4 -20 3 900 95 1
 -4 -20 -3 674 81 1
 -4 -20 -3 870 64 1
 4 20 3 790 80 1
 -5 -20 -3 764 66 1
 5 -20 3 682 89 1
 -5 -20 -3 954 101 1
 5 20 3 944 81 1
 6 -20 3 5569 261 1
 -6 -20 -3 5695 272 1
 -6 -20 -3 5629 233 1
 6 20 3 6067 252 1
 -7 -20 -3 136 39 1
 7 -20 3 115 45 1
 -7 -20 -3 149 64 1
 7 20 3 111 43 1
 -8 -20 -3 5955 257 1
 8 -20 3 6425 281 1
 -8 -20 -3 6119 293 1
 8 20 3 6074 266 1
 -9 -20 -3 329 59 1
 9 -20 3 492 74 1
 -9 -20 -3 542 92 1
 9 20 3 428 64 1
 -9 20 -3 438 66 1
 -10 -20 -3 842 89 1
 10 -20 3 778 87 1
 -10 -20 -3 828 103 1
 -10 20 -3 870 92 1
 10 20 3 741 79 1
 -11 -20 -3 578 76 1
 11 -20 3 817 90 1
 -11 -20 -3 685 100 1
 -11 20 -3 586 79 1
 -12 -20 -3 277 81 1
 -12 -20 -3 245 60 1
 -12 20 -3 280 67 1
 -13 -20 -3 79 74 1
 -13 -20 -3 37 51 1
 -13 20 -3 18 53 1
 -13 -21 3 1664 142 1
 -13 -21 3 1362 133 1
 -13 21 3 1313 120 1
 -12 -21 3 143 62 1
 -12 -21 3 190 76 1
 -12 21 3 177 55 1
 -11 -21 3 1923 134 1
 -11 -21 3 1906 148 1
 -11 21 3 1831 122 1
 -10 -21 3 0 52 1
 -10 -21 3 1 46 1
 -10 21 3 0 35 1
 -10 21 3 0 43 1
 -9 -21 3 77 57 1
 -9 -21 3 101 44 1
 -9 21 3 60 36 1
 -9 21 3 47 47 1
 -8 -21 3 1518 112 1
 -8 -21 3 1416 118 1
 8 -21 -3 1494 109 1
 -8 21 3 1543 100 1
 -8 21 3 1672 114 1
 -7 -21 3 140 50 1
 -7 -21 3 135 54 1
 7 -21 -3 58 45 1
 -7 21 3 31 33 1
 -7 21 3 135 45 1
 -6 -21 3 413 63 1
 -6 -21 3 440 76 1
 -6 21 3 379 56 1
 6 21 -3 373 58 1
 -6 21 3 486 64 1
 -5 -21 3 792 88 1
 5 21 -3 871 84 1
 -5 21 3 845 82 1
 -5 21 3 813 74 1
 -5 21 3 1039 109 1
 -4 -21 3 3625 187 1
 4 21 -3 3785 183 1
 -4 21 3 3912 182 1
 -4 21 3 3562 200 1
 -3 -21 3 6424 274 1
 -3 21 3 6379 294 1
 -3 21 3 6524 271 1
 3 21 -3 6226 275 1
 2 -21 -3 12208 489 1
 -2 -21 3 12757 488 1
 2 21 -3 12398 499 1
 -2 21 3 12336 510 1
 -1 -21 3 5865 235 1
 1 -21 -3 5739 247 1
 1 21 -3 5450 253 1
 -1 21 3 5328 256 1
 0 -21 3 4061 169 1
 0 -21 -3 3856 189 1
 0 21 3 3813 196 1
 0 21 -3 3921 196 1
 1 -21 3 5908 258 1
 1 -21 3 5692 215 1
 -1 -21 -3 5431 248 1
 1 21 3 4919 246 1
 2 -21 3 1358 103 1
 -2 -21 -3 1272 102 1
 2 21 3 1270 95 1
 3 -21 3 412 67 1
 -3 -21 -3 488 73 1
 3 21 3 348 58 1
 -4 -21 -3 149 37 1
 4 -21 3 65 42 1
 -4 -21 -3 89 45 1
 4 21 3 161 47 1
 5 -21 3 3222 172 1
 -5 -21 -3 2947 140 1
 -5 -21 -3 2919 170 1
 5 21 3 2844 156 1
 6 -21 3 2414 146 1
 -6 -21 -3 2314 122 1
 -6 -21 -3 2348 153 1
 6 21 3 2161 130 1
 -7 -21 -3 2312 152 1
 7 -21 3 2506 148 1
 -7 -21 -3 2363 129 1
 7 21 3 2411 135 1
 -8 -21 -3 12702 521 1
 -8 -21 -3 12113 471 1
 8 -21 3 12502 503 1
 8 21 3 12297 488 1
 -9 -21 -3 7797 354 1
 -9 -21 -3 7596 317 1
 9 -21 3 7699 335 1
 9 21 3 7392 324 1
 -10 -21 -3 756 109 1
 -10 -21 -3 742 82 1
 10 -21 3 813 93 1
 -10 21 -3 711 88 1
 -11 -21 -3 113 51 1
 -11 -21 -3 162 75 1
 11 -21 3 184 58 1
 -11 21 -3 176 52 1
 -12 -21 -3 244 62 1
 -12 -21 -3 154 79 1
 -12 21 -3 284 68 1
 -13 -21 -3 69 52 1
 -13 -21 -3 119 73 1
 -13 21 -3 152 57 1
 -13 -22 3 340 78 1
 -13 -22 3 399 93 1
 -13 22 3 394 70 1
 -12 -22 3 1181 115 1
 -12 -22 3 893 118 1
 -12 22 3 945 94 1
 -11 -22 3 328 81 1
 -11 -22 3 326 63 1
 -11 22 3 320 62 1
 -10 -22 3 984 110 1
 -10 -22 3 1047 106 1
 -10 22 3 1214 102 1
 -10 22 3 1193 102 1
 -9 -22 3 178 66 1
 -9 -22 3 208 54 1
 -9 22 3 389 59 1
 -9 22 3 202 54 1
 -8 -22 3 156 61 1
 8 -22 -3 223 54 1
 -8 -22 3 201 51 1
 -8 22 3 167 51 1
 -8 22 3 156 44 1
 -7 -22 3 15 38 1
 -7 -22 3 2 46 1
 7 -22 -3 34 43 1
 -7 22 3 1 34 1
 -7 22 3 1 31 1
 -6 -22 3 1652 127 1
 -6 -22 3 1446 116 1
 -6 22 3 1865 108 1
 6 22 -3 2003 118 1
 -6 22 3 1937 133 1
 -6 22 3 2059 121 1
 -5 -22 3 2318 137 1
 -5 22 3 1984 141 1
 -5 22 3 2330 125 1
 5 22 -3 2207 125 1
 -4 -22 3 999 87 1
 -4 22 3 476 81 1
 -4 22 3 632 72 1
 4 22 -3 631 74 1
 -3 -22 3 13989 551 1
 -3 22 3 14471 574 1
 3 22 -3 14172 554 1
 -3 22 3 13883 544 1
 2 -22 -3 71079 2560 1
 -2 -22 3 71995 2557 1
 -2 22 3 72373 2584 1
 2 22 -3 69720 2569 1
 -1 -22 3 6019 252 1
 1 -22 -3 5924 264 1
 -1 22 3 6249 282 1
 1 22 -3 5903 273 1
 0 -22 -3 28 34 1
 0 -22 3 42 27 1
 0 22 3 35 41 1
 0 22 -3 58 41 1
 1 -22 3 762 55 1
 -1 -22 -3 902 91 1
 1 -22 3 845 92 1
 1 22 3 914 91 1
 2 -22 3 4685 182 1
 -2 -22 -3 4685 223 1
 2 -22 3 5033 231 1
 2 22 3 4751 220 1
 -3 -22 -3 1561 114 1
 3 -22 3 1307 111 1
 3 22 3 1446 101 1
 -4 -22 -3 1581 121 1
 -4 -22 -3 1551 92 1
 4 -22 3 1605 119 1
 4 22 3 1750 109 1
 -5 -22 -3 2756 134 1
 5 -22 3 2702 161 1
 -5 -22 -3 2498 160 1
 5 22 3 2842 153 1
 -6 -22 -3 369 69 1
 6 -22 3 531 72 1
 -6 -22 -3 558 60 1
 6 22 3 586 70 1
 7 -22 3 192 57 1
 -7 -22 -3 285 51 1
 -7 -22 -3 320 73 1
 7 22 3 230 52 1
 -8 -22 -3 4955 252 1
 8 -22 3 4709 238 1
 -8 -22 -3 4689 217 1
 8 22 3 5240 230 1
 -9 -22 -3 1923 118 1
 9 -22 3 2087 144 1
 -9 -22 -3 1927 149 1
 9 22 3 2006 124 1
 10 -22 3 266 64 1
 -10 -22 -3 185 71 1
 -10 -22 -3 257 59 1
 11 -22 3 41 49 1
 -11 -22 -3 1 43 1
 -11 -22 -3 0 58 1
 -11 22 -3 15 43 1
 -12 -22 -3 51 71 1
 -12 -22 -3 93 54 1
 -12 22 -3 261 60 1
 -13 -22 -3 0 71 1
 -13 -22 -3 38 51 1
 -13 22 -3 37 56 1
 -13 -23 3 266 88 1
 -13 -23 3 357 79 1
 -13 23 3 416 74 1
 -12 -23 3 58 56 1
 -12 -23 3 38 62 1
 -12 23 3 111 49 1
 -11 -23 3 227 76 1
 -11 -23 3 201 62 1
 -11 23 3 272 55 1
 -10 -23 3 1221 126 1
 -10 -23 3 1477 114 1
 -10 23 3 1561 108 1
 -9 -23 3 1014 117 1
 -9 -23 3 1026 106 1
 -9 23 3 1072 94 1
 -8 -23 3 41 45 1
 8 -23 -3 8 43 1
 -8 -23 3 57 54 1
 -8 23 3 33 37 1
 -8 23 3 37 39 1
 7 -23 -3 500 71 1
 -7 -23 3 496 75 1
 -7 -23 3 523 69 1
 -7 23 3 538 67 1
 -7 23 3 447 59 1
 -6 -23 3 925 92 1
 -6 -23 3 1033 102 1
 6 23 -3 699 76 1
 -6 23 3 656 71 1
 -6 23 3 759 95 1
 -6 23 3 805 81 1
 -5 -23 3 941 95 1
 5 23 -3 1185 91 1
 -5 23 3 1166 89 1
 -5 23 3 1038 111 1
 -4 -23 3 1511 113 1
 -4 23 3 1598 107 1
 4 23 -3 1881 117 1
 -4 23 3 1826 135 1
 3 -23 -3 32183 1238 1
 -3 -23 3 33508 1241 1
 -3 23 3 34578 1266 1
 3 23 -3 33733 1244 1
 -2 -23 3 1226 92 1
 -1 -23 3 8595 338 1
 1 -23 -3 8326 349 1
 1 23 -3 8377 359 1
 -1 23 3 8797 370 1
 0 -23 3 3669 165 1
 0 -23 -3 3967 191 1
 0 23 3 3870 198 1
 0 23 -3 3839 195 1
 1 -23 3 605 77 1
 1 -23 3 629 50 1
 -1 -23 -3 598 73 1
 1 23 3 551 70 1
 2 -23 3 3437 186 1
 2 -23 3 3336 137 1
 -2 -23 -3 3589 181 1
 2 23 3 3565 180 1
 3 -23 3 5960 273 1
 -3 -23 -3 5648 268 1
 3 23 3 5808 265 1
 4 -23 3 2784 159 1
 -4 -23 -3 2788 165 1
 -4 -23 -3 3066 138 1
 4 23 3 3139 157 1
 -5 -23 -3 1468 118 1
 -5 -23 -3 1410 89 1
 5 -23 3 1620 120 1
 5 23 3 1602 104 1
 -6 -23 -3 731 71 1
 -6 -23 -3 879 99 1
 6 -23 3 844 95 1
 6 23 3 869 86 1
 7 -23 3 2156 137 1
 -7 -23 -3 1887 115 1
 -7 -23 -3 1813 144 1
 7 23 3 2134 125 1
 8 -23 3 4840 229 1
 -8 -23 -3 4302 204 1
 -8 -23 -3 4446 237 1
 8 23 3 4693 218 1
 9 -23 3 2027 138 1
 -9 -23 -3 2026 124 1
 -9 -23 -3 2178 157 1
 9 23 3 2274 131 1
 -10 -23 -3 0 41 1
 -10 -23 -3 1 56 1
 10 -23 3 19 50 1
 -11 -23 -3 448 94 1
 -11 -23 -3 326 65 1
 11 -23 3 435 79 1
 -12 -23 -3 30 44 1
 -12 -23 -3 3 72 1
 -13 -23 -3 91 76 1
 -13 -23 -3 50 51 1
 -13 -24 3 1117 120 1
 -13 -24 3 942 118 1
 -13 24 3 1241 111 1
 -12 -24 3 80 57 1
 -12 -24 3 35 68 1
 -12 24 3 105 48 1
 -11 -24 3 649 95 1
 -11 -24 3 740 99 1
 -11 24 3 694 82 1
 -10 -24 3 25 63 1
 -10 -24 3 74 50 1
 -10 24 3 53 44 1
 -9 -24 3 355 72 1
 -9 -24 3 333 68 1
 -9 24 3 286 56 1
 8 -24 -3 19 43 1
 -8 -24 3 13 50 1
 -8 -24 3 11 44 1
 -8 24 3 0 24 1
 -8 24 3 15 39 1
 7 -24 -3 1404 112 1
 -7 -24 3 1317 109 1
 -7 -24 3 1445 121 1
 -7 24 3 1276 94 1
 -6 -24 3 2 43 1
 -6 -24 3 1 36 1
 6 24 -3 16 39 1
 -6 24 3 30 34 1
 -6 24 3 38 50 1
 -5 -24 3 809 87 1
 5 24 -3 886 86 1
 -5 24 3 935 82 1
 -5 24 3 917 103 1
 -4 -24 3 3060 172 1
 4 24 -3 3362 173 1
 -4 24 3 3232 192 1
 -4 24 3 3531 167 1
 3 -24 -3 3633 183 1
 -3 -24 3 3935 188 1
 3 24 -3 3666 189 1
 -3 24 3 3908 209 1
 -2 -24 3 5287 245 1
 2 -24 -3 5598 251 1
 -2 24 3 5268 268 1
 2 24 -3 5643 262 1
 -1 -24 3 2827 142 1
 1 -24 -3 2840 152 1
 -1 24 3 2805 165 1
 1 24 -3 2858 162 1
 0 -24 -3 114 44 1
 0 -24 3 164 35 1
 0 24 -3 377 64 1
 0 24 3 278 62 1
 1 -24 3 8804 362 1
 -1 -24 -3 8283 352 1
 1 -24 3 8577 321 1
 1 24 3 8683 359 1
 -2 -24 -3 629 76 1
 2 -24 3 829 94 1
 2 24 3 717 84 1
 3 -24 3 3942 197 1
 -3 -24 -3 3895 196 1
 3 24 3 3552 186 1
 -4 -24 -3 2595 159 1
 -4 -24 -3 2745 136 1
 4 -24 3 2606 157 1
 4 24 3 2894 157 1
 -5 -24 -3 543 83 1
 5 -24 3 662 88 1
 -5 -24 -3 476 58 1
 5 24 3 464 67 1
 -6 -24 -3 397 75 1
 6 -24 3 419 70 1
 -6 -24 -3 342 52 1
 6 24 3 385 59 1
 7 -24 3 1966 134 1
 -7 -24 -3 1673 137 1
 -7 -24 -3 2047 116 1
 7 24 3 1849 119 1
 -8 -24 -3 6744 290 1
 -8 -24 -3 6635 325 1
 8 -24 3 7166 315 1
 8 24 3 7168 304 1
 -9 -24 -3 154 63 1
 9 -24 3 213 59 1
 -9 -24 -3 126 45 1
 9 24 3 161 51 1
 -10 -24 -3 960 112 1
 -10 -24 -3 1035 98 1
 10 -24 3 1059 108 1
 -11 -24 -3 883 115 1
 -11 -24 -3 1151 107 1
 11 -24 3 876 105 1
 -12 -24 -3 433 97 1
 -12 -24 -3 414 76 1
 -13 -24 -3 53 50 1
 -13 -24 -3 93 81 1
 -13 -25 3 1289 138 1
 -13 -25 3 1631 133 1
 -13 25 3 1610 124 1
 -12 -25 3 106 71 1
 -12 -25 3 166 61 1
 -12 25 3 156 53 1
 -11 -25 3 205 74 1
 -11 -25 3 422 78 1
 -11 25 3 383 67 1
 -10 -25 3 1641 129 1
 -10 -25 3 1560 146 1
 -10 25 3 1665 115 1
 -9 -25 3 638 89 1
 -9 -25 3 709 101 1
 -9 25 3 886 88 1
 8 -25 -3 229 58 1
 -8 -25 3 128 53 1
 -8 -25 3 110 58 1
 -8 25 3 212 49 1
 -8 25 3 9 26 1
 -7 -25 3 1159 111 1
 7 -25 -3 1045 106 1
 -7 -25 3 1211 120 1
 -7 25 3 1048 87 1
 -6 -25 3 1352 103 1
 -6 -25 3 1259 109 1
 -6 25 3 1274 121 1
 6 25 -3 1065 93 1
 -5 -25 3 2467 149 1
 5 25 -3 2388 139 1
 -5 25 3 2180 155 1
 -5 25 3 2277 129 1
 -4 -25 3 982 97 1
 -4 25 3 720 102 1
 -4 25 3 675 76 1
 4 25 -3 832 89 1
 -3 -25 3 2205 126 1
 3 -25 -3 1876 116 1
 3 25 -3 1895 127 1
 -3 25 3 1889 141 1
 -2 -25 3 6064 261 1
 2 -25 -3 5765 262 1
 2 25 -3 6009 276 1
 -2 25 3 6655 291 1
 1 -25 -3 6084 276 1
 -1 -25 3 6052 262 1
 1 25 -3 6496 290 1
 -1 25 3 6846 301 1
 0 -25 -3 2817 153 1
 0 -25 3 2789 132 1
 0 25 -3 2666 157 1
 0 25 3 2667 162 1
 1 -25 3 1547 117 1
 1 -25 3 1531 82 1
 -1 -25 -3 1567 109 1
 1 25 3 1286 107 1
 -2 -25 -3 344 61 1
 2 -25 3 437 74 1
 2 25 3 389 63 1
 3 -25 3 1468 120 1
 -3 -25 -3 1519 120 1
 3 25 3 1825 123 1
 -4 -25 -3 1981 108 1
 4 -25 3 1894 133 1
 -4 -25 -3 1905 130 1
 4 25 3 1805 122 1
 5 -25 3 438 75 1
 -5 -25 -3 417 54 1
 -5 -25 -3 370 72 1
 5 25 3 369 63 1
 6 -25 3 1458 116 1
 -6 -25 -3 1329 94 1
 -6 -25 -3 1185 121 1
 6 25 3 1061 103 1
 7 -25 3 4058 218 1
 -7 -25 -3 4039 189 1
 -7 -25 -3 4205 223 1
 7 25 3 4069 204 1
 8 -25 3 1315 110 1
 -8 -25 -3 974 107 1
 -8 -25 -3 1085 86 1
 8 25 3 1170 95 1
 -9 -25 -3 1539 144 1
 9 -25 3 1460 116 1
 -9 -25 -3 1410 101 1
 9 25 3 1463 108 1
 -10 -25 -3 1167 98 1
 -10 -25 -3 1325 133 1
 -11 -25 -3 22 44 1
 -11 -25 -3 46 67 1
 11 -25 3 22 51 1
 -12 -25 -3 78 80 1
 -12 -25 -3 53 50 1
 -12 -26 3 1111 116 1
 -12 -26 3 1178 129 1
 -12 26 3 1120 104 1
 -11 -26 3 0 61 1
 -11 -26 3 47 53 1
 -11 26 3 0 41 1
 -10 -26 3 36 60 1
 -10 -26 3 60 54 1
 -10 26 3 60 46 1
 -9 -26 3 2804 167 1
 -9 -26 3 2582 174 1
 -9 26 3 2531 145 1
 -8 -26 3 583 87 1
 -8 -26 3 580 81 1
 8 -26 -3 661 84 1
 -8 26 3 537 69 1
 -8 26 3 334 60 1
 7 -26 -3 84 51 1
 -7 -26 3 96 53 1
 -7 -26 3 109 61 1
 -7 26 3 1 25 1
 -6 -26 3 2627 159 1
 -6 -26 3 2483 149 1
 6 26 -3 2782 148 1
 -6 26 3 2594 166 1
 -5 -26 3 1900 128 1
 5 26 -3 1904 119 1
 -5 26 3 1752 110 1
 -5 26 3 1859 142 1
 -4 -26 3 95 48 1
 4 -26 -3 88 41 1
 -4 26 3 71 58 1
 -4 26 3 67 37 1
 4 26 -3 67 44 1
 -3 -26 3 847 87 1
 3 -26 -3 819 85 1
 3 26 -3 707 85 1
 -3 26 3 670 98 1
 2 -26 -3 20420 782 1
 -2 -26 3 20311 779 1
 2 26 -3 20877 797 1
 -2 26 3 21505 811 1
 1 -26 -3 218 52 1
 -1 -26 3 248 46 1
 -1 26 3 249 60 1
 1 26 -3 220 56 1
 0 -26 -3 999 91 1
 0 -26 3 990 74 1
 0 26 -3 1112 112 1
 0 26 3 1123 99 1
 -1 -26 -3 1061 94 1
 1 -26 3 958 69 1
 1 -26 3 1104 109 1
 1 26 3 1118 101 1
 -2 -26 -3 1751 122 1
 2 -26 3 1735 124 1
 2 26 3 1524 116 1
 -3 -26 -3 287 67 1
 3 -26 3 275 68 1
 3 26 3 315 63 1
 -4 -26 -3 1557 103 1
 4 -26 3 1754 131 1
 -4 -26 -3 1697 128 1
 4 26 3 1974 127 1
 5 -26 3 5014 252 1
 -5 -26 -3 5021 251 1
 -5 -26 -3 4981 221 1
 5 26 3 5278 241 1
 -6 -26 -3 150 44 1
 -6 -26 -3 95 63 1
 6 -26 3 186 61 1
 6 26 3 169 49 1
 7 -26 3 522 81 1
 -7 -26 -3 496 80 1
 -7 -26 -3 520 66 1
 7 26 3 409 66 1
 -8 -26 -3 1298 98 1
 -8 -26 -3 1195 122 1
 8 -26 3 1090 112 1
 8 26 3 1346 102 1
 -9 -26 -3 104 64 1
 9 -26 3 227 61 1
 -9 -26 -3 191 51 1
 9 26 3 197 58 1
 10 -26 3 201 63 1
 -10 -26 -3 138 72 1
 -10 -26 -3 163 54 1
 -11 -26 -3 0 65 1
 -11 -26 -3 54 51 1
 -12 -26 -3 191 62 1
 -12 -26 -3 254 81 1
 -12 -27 3 697 112 1
 -12 -27 3 766 100 1
 -12 27 3 818 92 1
 -11 -27 3 425 91 1
 -11 -27 3 564 89 1
 -11 27 3 544 70 1
 -10 -27 3 39 54 1
 -10 -27 3 37 63 1
 -10 27 3 65 47 1
 -9 -27 3 412 75 1
 -9 -27 3 302 74 1
 -9 27 3 455 66 1
 -8 -27 3 2592 162 1
 -8 -27 3 2694 172 1
 8 -27 -3 2806 162 1
 -8 27 3 2833 154 1
 -7 -27 3 494 79 1
 -7 -27 3 750 92 1
 7 -27 -3 645 87 1
 -7 27 3 484 85 1
 -7 27 3 463 67 1
 -6 -27 3 1701 124 1
 -6 -27 3 1770 129 1
 6 27 -3 1586 115 1
 -6 27 3 1608 132 1
 -5 -27 3 197 59 1
 -5 27 3 278 74 1
 5 27 -3 275 62 1
 -4 -27 3 1735 122 1
 4 -27 -3 1943 120 1
 4 27 -3 1970 128 1
 -4 27 3 2046 148 1
 3 -27 -3 1949 122 1
 -3 -27 3 2051 126 1
 3 27 -3 2131 133 1
 -3 27 3 2207 149 1
 2 -27 -3 1493 107 1
 -2 -27 3 1457 106 1
 -2 27 3 1797 138 1
 2 27 -3 1751 124 1
 1 -27 -3 1827 116 1
 -1 -27 3 1814 105 1
 1 27 -3 1625 123 1
 -1 27 3 1814 133 1
 0 -27 3 297 44 1
 0 -27 -3 309 60 1
 0 27 -3 244 60 1
 0 27 3 187 56 1
 -1 -27 -3 12534 511 1
 1 -27 3 12734 523 1
 1 -27 3 12163 478 1
 -1 27 -3 13215 527 1
 1 27 3 12673 517 1
 2 -27 3 12008 496 1
 -2 -27 -3 11930 488 1
 2 27 3 11955 490 1
 -3 -27 -3 121 47 1
 3 -27 3 179 59 1
 3 27 3 42 41 1
 4 -27 3 1979 139 1
 -4 -27 -3 2126 120 1
 -4 -27 -3 2371 148 1
 4 27 3 1767 130 1
 -5 -27 -3 5260 223 1
 -5 -27 -3 4931 250 1
 5 -27 3 5163 255 1
 5 27 3 4985 241 1
 -6 -27 -3 548 67 1
 6 -27 3 575 89 1
 -6 -27 -3 530 90 1
 6 27 3 516 75 1
 7 -27 3 612 84 1
 -7 -27 -3 797 99 1
 -7 -27 -3 699 75 1
 7 27 3 653 83 1
 8 -27 3 2265 154 1
 -8 -27 -3 2294 163 1
 -8 -27 -3 2368 134 1
 8 27 3 2469 155 1
 -9 -27 -3 31 54 1
 -9 -27 -3 18 42 1
 9 -27 3 15 49 1
 9 27 3 92 50 1
 -10 -27 -3 92 49 1
 -10 -27 -3 130 65 1
 10 -27 3 24 53 1
 -11 -27 -3 50 61 1
 -11 -27 -3 9 47 1
 -12 -27 -3 1333 150 1
 -12 -28 3 559 90 1
 -12 -28 3 642 104 1
 -12 28 3 718 87 1
 -11 -28 3 1734 159 1
 -11 28 3 1559 118 1
 -10 -28 3 38 59 1
 -10 -28 3 1 48 1
 -10 28 3 5 44 1
 -9 -28 3 480 90 1
 -9 -28 3 577 83 1
 -9 28 3 579 73 1
 8 -28 -3 842 93 1
 -8 -28 3 931 100 1
 -8 -28 3 982 104 1
 -7 -28 3 3337 184 1
 -7 -28 3 2880 171 1
 7 -28 -3 2894 170 1
 -7 28 3 2743 154 1
 -7 28 3 2775 183 1
 -6 -28 3 279 65 1
 -6 -28 3 252 63 1
 -6 28 3 129 39 1
 6 28 -3 176 54 1
 -6 28 3 160 64 1
 -5 -28 3 485 76 1
 5 28 -3 668 82 1
 -5 28 3 638 96 1
 4 -28 -3 2201 131 1
 -4 -28 3 2354 141 1
 -4 28 3 2554 165 1
 4 28 -3 2464 142 1
 3 -28 -3 257 49 1
 -3 -28 3 328 57 1
 3 28 -3 290 59 1
 -3 28 3 264 65 1
 2 -28 -3 1732 114 1
 -2 -28 3 1707 109 1
 2 28 -3 1606 120 1
 -2 28 3 1521 131 1
 1 -28 -3 337 60 1
 -1 -28 3 208 45 1
 1 28 -3 542 79 1
 -1 28 3 420 77 1
 0 -28 3 1903 105 1
 0 -28 -3 1718 120 1
 0 28 -3 1895 131 1
 0 28 3 1991 139 1
 1 -28 3 14923 610 1
 -1 -28 -3 15304 603 1
 1 28 3 15245 610 1
 -1 28 -3 15201 618 1
 2 -28 3 1370 118 1
 -2 -28 -3 1447 112 1
 2 28 3 1309 111 1
 -3 -28 -3 591 82 1
 3 -28 3 506 76 1
 3 28 3 734 87 1
 -4 -28 -3 5016 256 1
 -4 -28 -3 5199 227 1
 4 -28 3 5183 258 1
 4 28 3 5652 250 1
 5 -28 3 2625 164 1
 -5 -28 -3 2697 166 1
 -5 -28 -3 2566 138 1
 5 28 3 2640 155 1
 -6 -28 -3 71 60 1
 6 -28 3 45 53 1
 -6 -28 -3 3 33 1
 6 28 3 76 46 1
 7 -28 3 380 71 1
 -7 -28 -3 390 59 1
 -7 -28 -3 395 82 1
 7 28 3 360 64 1
 -8 -28 -3 514 68 1
 -8 -28 -3 512 93 1
 8 -28 3 519 86 1
 8 28 3 539 76 1
 -9 -28 -3 205 74 1
 9 -28 3 294 67 1
 -9 -28 -3 159 49 1
 9 28 3 117 54 1
 10 -28 3 3111 177 1
 -10 -28 -3 3030 189 1
 -10 -28 -3 2640 157 1
 -11 -28 -3 267 64 1
 -11 -28 -3 398 96 1
 11 -28 3 295 78 1
 -12 -28 -3 148 80 1
 -12 -29 3 670 110 1
 -12 -29 3 847 111 1
 -12 29 3 824 94 1
 -11 -29 3 101 67 1
 -11 -29 3 84 58 1
 -11 29 3 112 52 1
 -10 -29 3 485 92 1
 -10 -29 3 434 75 1
 -10 29 3 366 64 1
 -9 -29 3 225 66 1
 -9 -29 3 280 73 1
 -8 -29 3 1709 144 1
 8 -29 -3 1467 127 1
 -8 -29 3 1470 129 1
 -7 -29 3 3594 201 1
 7 -29 -3 3644 198 1
 -7 -29 3 3453 193 1
 -7 29 3 3552 207 1
 -7 29 3 3658 181 1
 -6 -29 3 8494 367 1
 -6 -29 3 8323 357 1
 -6 29 3 8156 378 1
 6 29 -3 8598 355 1
 -6 29 3 8344 344 1
 5 -29 -3 710 76 1
 -5 -29 3 383 71 1
 -5 29 3 613 92 1
 5 29 -3 578 75 1
 -4 -29 3 4725 237 1
 4 -29 -3 4925 230 1
 -4 29 3 5079 263 1
 4 29 -3 4694 237 1
 3 -29 -3 634 75 1
 -3 -29 3 617 77 1
 3 29 -3 800 90 1
 -3 29 3 859 109 1
 2 -29 -3 332 57 1
 -2 -29 3 274 55 1
 2 29 -3 318 65 1
 -2 29 3 574 89 1
 -1 -29 3 1006 83 1
 1 -29 -3 1013 98 1
 1 29 -3 1083 111 1
 -1 29 3 1132 114 1
 0 -29 -3 106 47 1
 0 -29 3 74 35 1
 0 29 3 106 52 1
 0 29 -3 126 54 1
 -1 -29 -3 2683 157 1
 1 -29 3 2637 166 1
 1 29 3 2501 158 1
 -1 29 -3 2861 171 1
 -2 -29 -3 2762 161 1
 2 -29 3 2869 172 1
 2 29 3 2798 165 1
 3 -29 3 958 107 1
 -3 -29 -3 1163 111 1
 3 29 3 1144 111 1
 4 -29 3 4994 255 1
 -4 -29 -3 4872 222 1
 -4 -29 -3 5062 250 1
 4 29 3 5044 244 1
 5 -29 3 553 86 1
 -5 -29 -3 452 81 1
 -5 -29 -3 437 61 1
 5 29 3 373 67 1
 6 -29 3 1120 111 1
 -6 -29 -3 976 103 1
 -6 -29 -3 1105 88 1
 6 29 3 1118 101 1
 7 -29 3 355 73 1
 -7 -29 -3 293 57 1
 -7 -29 -3 413 82 1
 7 29 3 404 70 1
 8 -29 3 111 59 1
 -8 -29 -3 124 48 1
 -8 -29 -3 199 71 1
 8 29 3 107 50 1
 -9 -29 -3 10 42 1
 -9 -29 -3 61 66 1
 9 -29 3 0 48 1
 -10 -29 -3 347 65 1
 -10 -29 -3 211 76 1
 -11 -29 -3 600 104 1
 -12 -29 -3 95 70 1
 -12 -30 3 96 66 1
 -12 -30 3 225 82 1
 -12 30 3 204 60 1
 -11 -30 3 90 54 1
 -11 -30 3 46 70 1
 -10 -30 3 223 61 1
 -10 -30 3 206 70 1
 -9 -30 3 4034 227 1
 -9 -30 3 3941 218 1
 8 -30 -3 1 49 1
 -8 -30 3 77 56 1
 -8 -30 3 149 63 1
 -7 -30 3 1232 123 1
 7 -30 -3 1099 113 1
 -7 -30 3 920 99 1
 -7 30 3 1194 128 1
 -6 -30 3 13810 552 1
 -6 -30 3 13302 535 1
 -6 30 3 13404 568 1
 6 30 -3 13375 540 1
 -6 30 3 13797 532 1
 5 -30 -3 1569 108 1
 -5 -30 3 1507 117 1
 5 30 -3 1197 110 1
 -5 30 3 1434 144 1
 4 -30 -3 1939 120 1
 -4 -30 3 1861 128 1
 4 30 -3 1880 130 1
 -4 30 3 1914 150 1
 3 -30 -3 139 47 1
 -3 -30 3 208 56 1
 3 30 -3 114 54 1
 -3 30 3 75 65 1
 -2 -30 3 292 57 1
 2 -30 -3 428 67 1
 2 30 -3 402 72 1
 -2 30 3 329 78 1
 -1 -30 3 732 72 1
 1 -30 -3 672 79 1
 1 30 -3 961 104 1
 -1 30 3 872 107 1
 0 -30 -3 352 61 1
 0 -30 3 291 47 1
 0 30 -3 344 73 1
 0 30 3 312 69 1
 1 -30 3 272 68 1
 -1 -30 -3 594 78 1
 1 30 3 550 84 1
 -1 30 -3 487 75 1
 -2 -30 -3 8303 360 1
 2 -30 3 7911 366 1
 2 30 3 8438 365 1
 3 -30 3 1595 126 1
 -3 -30 -3 1638 116 1
 3 30 3 1447 126 1
 -4 -30 -3 1139 110 1
 4 -30 3 1328 124 1
 4 30 3 1278 117 1
 5 -30 3 2284 154 1
 -5 -30 -3 2234 127 1
 -5 -30 -3 2266 152 1
 5 30 3 1978 136 1
 -6 -30 -3 355 60 1
 -6 -30 -3 268 68 1
 6 -30 3 292 69 1
 6 30 3 276 64 1
 7 -30 3 441 78 1
 -7 -30 -3 496 86 1
 -7 -30 -3 564 70 1
 7 30 3 649 85 1
 -8 -30 -3 607 73 1
 -8 -30 -3 724 103 1
 8 -30 3 965 109 1
 8 30 3 762 92 1
 9 -30 3 1043 115 1
 -9 -30 -3 1037 122 1
 -9 -30 -3 1153 102 1
 9 30 3 1037 108 1
 -10 -30 -3 1710 155 1
 -11 -30 -3 195 81 1
 -12 -30 -3 1762 168 1
 -12 -31 3 668 99 1
 -12 -31 3 711 113 1
 -11 -31 3 95 63 1
 -11 -31 3 63 70 1
 -10 -31 3 25 52 1
 -10 -31 3 5 66 1
 -9 -31 3 374 77 1
 -9 -31 3 280 77 1
 -8 -31 3 424 79 1
 -8 -31 3 429 83 1
 8 -31 -3 515 84 1
 -7 -31 3 305 69 1
 -7 -31 3 319 71 1
 7 -31 -3 285 71 1
 -7 31 3 337 78 1
 -6 -31 3 6270 300 1
 -6 31 3 6024 309 1
 6 31 -3 6179 285 1
 -6 31 3 6491 277 1
 5 -31 -3 2485 144 1
 -5 -31 3 2506 158 1
 -5 31 3 2661 177 1
 5 31 -3 2530 154 1
 4 -31 -3 845 86 1
 -4 -31 3 900 93 1
 4 31 -3 813 90 1
 -4 31 3 976 114 1
 3 -31 -3 82 42 1
 -3 -31 3 89 48 1
 -3 31 3 74 62 1
 3 31 -3 101 52 1
 -2 -31 3 1105 89 1
 2 -31 -3 1085 90 1
 -2 31 3 1102 117 1
 2 31 -3 1094 106 1
 -1 -31 3 4214 199 1
 1 -31 -3 4169 215 1
 -1 31 3 4494 237 1
 1 31 -3 4644 230 1
 0 -31 -3 2755 158 1
 0 31 3 2774 173 1
 0 31 -3 2590 168 1
 1 -31 3 3282 185 1
 -1 -31 -3 3142 175 1
 -1 31 -3 2912 180 1
 1 31 3 2881 181 1
 2 -31 3 8904 396 1
 -2 -31 -3 9354 387 1
 2 31 3 9103 391 1
 3 -31 3 1922 144 1
 -3 -31 -3 1927 138 1
 3 31 3 2002 139 1
 -4 -31 -3 268 69 1
 4 -31 3 228 64 1
 4 31 3 223 64 1
 -5 -31 -3 1253 97 1
 5 -31 3 1322 115 1
 -5 -31 -3 1343 119 1
 5 31 3 1467 115 1
 -6 -31 -3 623 89 1
 6 -31 3 576 82 1
 -6 -31 -3 547 68 1
 6 31 3 669 85 1
 -7 -31 -3 1218 96 1
 -7 -31 -3 1241 123 1
 7 -31 3 1195 122 1
 7 31 3 1414 115 1
 -8 -31 -3 2097 161 1
 -8 -31 -3 2214 136 1
 8 -31 3 2406 158 1
 8 31 3 2369 146 1
 -9 -31 -3 9 43 1
 -9 -31 -3 50 66 1
 9 -31 3 103 60 1
 9 31 3 40 51 1
 -10 -31 -3 36 68 1
 10 -31 3 0 54 1
 -11 -31 -3 58 65 1
 -11 -32 3 691 100 1
 -11 -32 3 519 97 1
 -10 -32 3 118 70 1
 -10 -32 3 126 66 1
 -9 -32 3 361 71 1
 -9 -32 3 289 79 1
 -8 -32 3 425 74 1
 -8 -32 3 437 85 1
 8 -32 -3 443 79 1
 -7 -32 3 2023 147 1
 7 -32 -3 1775 137 1
 -7 -32 3 1776 138 1
 -7 32 3 1800 153 1
 -6 -32 3 338 71 1
 6 -32 -3 374 65 1
 -6 32 3 330 79 1
 6 32 -3 408 71 1
 5 -32 -3 1403 107 1
 -5 -32 3 1373 116 1
 -5 32 3 1694 142 1
 5 32 -3 1376 112 1
 4 -32 -3 403 64 1
 -4 -32 3 368 68 1
 -4 32 3 320 73 1
 4 32 -3 511 77 1
 3 -32 -3 33 38 1
 -3 -32 3 18 44 1
 -3 32 3 74 63 1
 3 32 -3 1 40 1
 -2 -32 3 519 69 1
 2 -32 -3 556 72 1
 -2 32 3 499 86 1
 2 32 -3 577 84 1
 1 -32 -3 259 54 1
 -1 -32 3 251 50 1
 -1 32 3 194 59 1
 1 32 -3 239 60 1
 0 -32 -3 2373 148 1
 0 32 -3 2631 167 1
 0 32 3 2661 170 1
 -1 -32 -3 12147 480 1
 1 -32 3 11891 490 1
 1 32 3 11680 489 1
 -1 32 -3 11880 496 1
 2 -32 3 367 75 1
 -2 -32 -3 334 68 1
 2 32 3 413 75 1
 3 -32 3 576 91 1
 -3 -32 -3 841 102 1
 3 32 3 740 95 1
 -4 -32 -3 1608 128 1
 4 -32 3 1418 129 1
 4 32 3 1574 126 1
 -5 -32 -3 9 55 1
 -5 -32 -3 9 40 1
 5 -32 3 15 51 1
 5 32 3 53 49 1
 -6 -32 -3 390 62 1
 6 -32 3 460 85 1
 -6 -32 -3 475 88 1
 6 32 3 376 73 1
 -7 -32 -3 1826 149 1
 7 -32 3 2210 154 1
 -7 -32 -3 2093 128 1
 7 32 3 2117 151 1
 -8 -32 -3 3880 201 1
 -8 -32 -3 4514 237 1
 8 -32 3 4327 229 1
 8 32 3 4350 214 1
 9 -32 3 820 105 1
 -9 -32 -3 903 115 1
 9 32 3 816 100 1
 10 -32 3 156 65 1
 -10 -32 -3 112 71 1
 11 -32 3 1372 137 1
 -11 -32 -3 1036 129 1
 -11 -33 3 241 84 1
 -11 -33 3 54 62 1
 -10 -33 3 13 57 1
 -10 -33 3 0 57 1
 -9 -33 3 502 90 1
 -9 -33 3 463 82 1
 -8 -33 3 164 66 1
 -8 -33 3 218 69 1
 8 -33 -3 192 65 1
 -7 -33 3 4551 230 1
 -7 -33 3 4513 239 1
 7 -33 -3 4350 235 1
 -7 33 3 4487 253 1
 -6 -33 3 3419 195 1
 -6 33 3 3372 210 1
 6 33 -3 3279 186 1
 -5 -33 3 130 59 1
 5 -33 -3 144 50 1
 -5 33 3 71 66 1
 5 33 -3 102 52 1
 -4 -33 3 813 93 1
 4 -33 -3 911 88 1
 -4 33 3 1010 123 1
 4 33 -3 837 94 1
 3 -33 -3 239 55 1
 -3 -33 3 298 62 1
 -3 33 3 258 71 1
 3 33 -3 262 64 1
 -2 -33 3 2268 130 1
 2 -33 -3 2045 130 1
 2 33 -3 2336 148 1
 -2 33 3 2136 153 1
 -1 -33 3 2512 138 1
 1 -33 -3 2728 152 1
 -1 33 3 2545 170 1
 1 33 -3 2400 156 1
 0 -33 -3 1200 107 1
 0 33 3 883 103 1
 0 33 -3 997 110 1
 -1 -33 -3 786 91 1
 1 -33 3 868 104 1
 1 33 3 1076 113 1
 -1 33 -3 943 110 1
 -2 -33 -3 384 72 1
 2 -33 3 254 66 1
 2 33 3 407 78 1
 3 -33 3 1457 140 1
 -3 -33 -3 1613 124 1
 3 33 3 1438 119 1
 4 -33 3 1163 119 1
 -4 -33 -3 1380 126 1
 4 33 3 1298 115 1
 5 -33 3 797 99 1
 -5 -33 -3 794 85 1
 -5 -33 -3 745 94 1
 5 33 3 961 102 1
 -6 -33 -3 657 76 1
 6 -33 3 545 87 1
 -6 -33 -3 795 100 1
 6 33 3 548 82 1
 -7 -33 -3 1930 151 1
 -7 -33 -3 1871 122 1
 7 -33 3 2041 146 1
 7 33 3 1805 132 1
 -8 -33 -3 495 94 1
 8 -33 3 395 82 1
 8 33 3 495 78 1
 9 -33 3 41 55 1
 -9 -33 -3 0 65 1
 10 -33 3 109 63 1
 -10 -33 -3 238 81 1
 -11 -33 -3 1201 138 1
 11 -33 3 1460 145 1
 -11 -34 3 0 49 1
 -11 -34 3 127 77 1
 -10 -34 3 16 50 1
 -10 -34 3 54 68 1
 -9 -34 3 148 69 1
 -9 -34 3 404 82 1
 8 -34 -3 426 80 1
 -8 -34 3 427 85 1
 -8 -34 3 497 85 1
 7 -34 -3 856 105 1
 -7 -34 3 942 109 1
 -7 -34 3 714 95 1
 -7 34 3 543 96 1
 -6 -34 3 3466 202 1
 -6 34 3 4018 227 1
 6 34 -3 3942 201 1
 5 -34 -3 578 74 1
 -5 -34 3 575 83 1
 5 34 -3 705 84 1
 -5 34 3 531 92 1
 4 -34 -3 482 68 1
 -4 -34 3 451 75 1
 4 34 -3 453 76 1
 -4 34 3 518 90 1
 3 -34 -3 95 48 1
 -3 -34 3 94 53 1
 3 34 -3 232 61 1
 -3 34 3 85 59 1
 -2 -34 3 1470 107 1
 2 -34 -3 1412 108 1
 -2 34 3 1510 130 1
 2 34 -3 1574 123 1
 1 -34 -3 71 46 1
 -1 34 3 64 58 1
 1 34 -3 47 46 1
 0 -34 -3 410 67 1
 0 34 3 381 80 1
 0 34 -3 307 69 1
 -1 -34 -3 555 76 1
 1 -34 3 607 89 1
 -1 34 -3 484 86 1
 1 34 3 441 77 1
 2 -34 3 692 91 1
 -2 -34 -3 693 87 1
 2 34 3 383 77 1
 -3 -34 -3 753 91 1
 3 -34 3 625 92 1
 3 34 3 748 89 1
 -4 -34 -3 515 85 1
 4 -34 3 521 88 1
 4 34 3 632 90 1
 -5 -34 -3 598 93 1
 -5 -34 -3 494 67 1
 5 -34 3 608 94 1
 5 34 3 562 88 1
 -6 -34 -3 64 58 1
 6 -34 3 55 56 1
 -6 -34 -3 55 42 1
 6 34 3 121 57 1
 7 -34 3 222 65 1
 -7 -34 -3 473 91 1
 7 34 3 347 72 1
 8 -34 3 2143 161 1
 -8 -34 -3 2180 163 1
 8 34 3 2179 149 1
 9 -34 3 1063 118 1
 -9 -34 -3 1012 124 1
 -10 -34 -3 1280 133 1
 -11 -34 -3 110 80 1
 11 -34 3 170 73 1
 -11 -35 3 994 123 1
[truncated: 1,461,631 more chars]
